# **Statistics of eigenvalue dispersion indices: quantifying the magnitude of phenotypic integration**

Junya Watanabe

Department of Earth Sciences, University of Cambridge, Downing Street, Cambridge, CB2

3EQ, United Kingdom

[jw2098@cam.ac.uk](mailto:jw2098@cam.ac.uk)

<https://orcid.org/0000-0002-9810-5286>

## 1 **Abstract**

2 Quantification of the magnitude of covariation plays a major role in the studies of phenotypic  
3 integration, for which statistics based on dispersion of eigenvalues of a covariance or  
4 correlation matrix—eigenvalue dispersion indices—are commonly used. However, their use  
5 has been hindered by a lack of clear understandings on their statistical meaning and sampling  
6 properties such as the magnitude of sampling bias and error. This study remedies these issues  
7 by investigating properties of these statistics with both analytic and simulation-based  
8 approaches. The relative eigenvalue variance of a covariance matrix is known in the  
9 statistical literature as a test statistic for sphericity, thus is an appropriate measure of  
10 eccentricity of variation. The same of a correlation matrix is exactly equal to the average  
11 squared correlation, thus is a clear measure of overall integration. Exact and approximate  
12 expressions for the mean and variance of these statistics are analytically derived for the null  
13 and arbitrary conditions under multivariate normality, clarifying the effects of sample size  $N$ ,  
14 number of variables  $p$ , and parameters on the sampling bias and error. Accuracy of the  
15 approximate expressions are evaluated with simulations, confirming that most of them work  
16 reasonably well with a moderate sample size ( $N \geq 16-64$ ). Importantly, sampling properties  
17 of these indices are not adversely affected by high  $p:N$  ratio, promising their utility in high-  
18 dimensional phenotypic analyses. These statistics can potentially be applied to shape  
19 variables and phylogenetically structured data, for which necessary assumptions and  
20 modifications are presented.

21 **Keywords:** covariance matrix; evolutionary constraint; morphometrics; phenotypic  
22 integration; quantitative genetics; Wishart distribution.

23

## 24 **Introduction**

25 Analysis of trait covariation plays a central role in investigations into evolution of  
26 quantitative traits. The well-known quantitative genetic theory of correlated traits predicts  
27 that evolutionary response in a population under selection is dictated by the additive genetic  
28 covariance matrix  $\mathbf{G}$  as well as the selection gradient (Lande, 1979; Lande & Arnold, 1983).  
29 Short-term evolutionary changes of a population are expected to be concentrated in major  
30 axes of the  $\mathbf{G}$  matrix (Schluter, 1996). Arguably, the structure of the  $\mathbf{G}$  matrix can be  
31 approximated by that of the phenotypic covariance matrix for certain types of traits  
32 (Cheverud, 1988, 1996; Roff, 1995; Dochtermann, 2011; Sodini et al., 2018), so the latter  
33 could potentially be analyzed when accurate estimation of the  $\mathbf{G}$  matrix is not feasible. These  
34 theories and conjectures spurred extensive theoretical and empirical explorations on character  
35 covariation as an evolutionary constraint (e.g., Steppan et al., 2002; Chenoweth et al., 2010;  
36 Hansen et al., 2019 and references therein). Partly fueled by these developments, the study of  
37 phenotypic integration has developed as an active field of research, where various aspects of  
38 character covariation are investigated with diverse motivations and scopes (e.g., Olson &  
39 Miller, 1958; Cheverud, 1982; Goswami, 2006; Hallgrímsson et al., 2009; Armbruster et al.,  
40 2014; Felice et al., 2018). In the latter context, many different levels of organismal variation  
41 can be subjects of research, such as static, ontogenetic, and evolutionary levels (Klingenberg,  
42 2014). For example, relationships between within-population integration and evolutionary  
43 rate and/or trajectories have attained much attention as potential links between micro- and  
44 macroevolutionary phenomena (e.g., Klingenberg et al., 2012; Renaud & Auffray, 2013;  
45 Goswami et al., 2015; Haber, 2015, 2016).

46 An obvious target of investigation in these contexts is quantitative analysis of  
47 magnitude of constraint or integration entailed in covariance structures. In particular, this  
48 paper concerns methodology for quantifying the overall magnitude of covariation within a set

49 of traits. Quantification of relative (in)dependence between multiple sets of traits—the  
50 modularity–integration spectrum—is another major way of studying integration which has  
51 separate methodological frameworks (e.g., Goswami & Polly, 2010; Adams, 2016; Goswami  
52 & Finarelli, 2016; Adams & Collyer, 2019a). Demonstrating the presence of integration with  
53 a statistically justified measure can be the scope of an empirical analysis, sometimes as a part  
54 of testing combined hypotheses (e.g., Brommer, 2014; Watanabe, 2018). A univariate  
55 summary statistic for magnitude of integration can conveniently be used in comparative  
56 analyses across developmental stages, populations, or phylogeny (e.g., Marroig et al., 2009;  
57 Porto et al., 2009; Haber, 2016). A plethora of statistics have been proposed for such  
58 purposes from various standpoints (e.g., Van Valen, 1974, 2005; Cheverud et al., 1983, 1989;  
59 Wagner, 1984; Cane, 1993; Hansen & Houle, 2008; Agrawal & Stinchcombe, 2009;  
60 Kirkpatrick, 2009; Pavlicev et al., 2009; Armbruster et al., 2009, 2014; Haber, 2011; Pitchers  
61 et al., 2014). One of the most popular class of such statistics is based on the dispersion of  
62 eigenvalues of a covariance or correlation matrix. These statistics have the forms

$$70 \quad V = \frac{1}{p} \sum_{i=1}^p (\lambda_i - \bar{\lambda})^2,$$

$$71 \quad V_{\text{rel}} = \frac{\sum_{i=1}^p (\lambda_i - \bar{\lambda})^2}{p(p-1) \bar{\lambda}^2},$$

63 where  $p$  is the number of variables (traits),  $\lambda_i$  is the  $i$ th eigenvalue of the covariance or  
64 correlation matrix under analysis, and  $\bar{\lambda}$  is the average of the eigenvalues. Here,  $V$  is the most  
65 naïve form of eigenvalue dispersion, and  $V_{\text{rel}}$  is a scaled version which ranges between 0 and  
66 1. Formal definitions are given below with distinction between population and sample  
67 quantities. Some authors use square root or a constant multiple of these forms, but such  
68 variants essentially bear identical information when calculated from the same matrix.  
69 Alternative terms for this class of statistics include the tightness (for  $V_{\text{rel}}$ ; Van Valen, 1974;

72 later used for  $\sqrt{V_{\text{rel}}}$  by Van Valen, 2005), integration coefficient of variation (for  
73  $\sqrt{(p-1)V_{\text{rel}}}$ ; Shirai & Marroig, 2010), and phenotypic integration index (for  $V$ ; Torices &  
74 Muñoz-Pajares, 2015). In this paper,  $V$  and  $V_{\text{rel}}$  are called the eigenvalue variance and  
75 relative eigenvalue variance, respectively, to take a balance between brevity and  
76 descriptiveness. These quantities are not to be confused with the sampling variance  
77 associated with eigenvalues in a sample (see below).

78         Since eigenvalues of a covariance or correlation matrix correspond to the variance  
79 along the corresponding eigenvectors (principal components), these statistics are supposed to  
80 represent eccentricity of variation across directions in a trait space (Fig. 1; Wagner, 1984).  
81 Cheverud et al. (1983) and Wagner (1984) were the first to propose using  $V$  of a correlation  
82 matrix for quantifying magnitude of integration. Pavlicev et al. (2009) devised  $V_{\text{rel}}$  of a  
83 correlation matrix, and explored its relationships to correlation structures in certain  
84 biologically relevant conditions. Haber (2011) pointed out similarity between these indices  
85 and Van Valen's (1974) tightness index for a covariance matrix, and proposed that these  
86 indices can be applied to either covariance or correlation matrices with slightly different  
87 interpretations. Eigenvalue dispersion indices are frequently used in empirical analyses of  
88 phenotypic integration at various levels of organismal variation, from phenotypic covariance  
89 at the population level to evolutionary covariance at the interspecific level (e.g., Ordano et  
90 al., 2008; Torices & Mendez, 2014; Haber, 2016; Haber & Dworkin, 2017; Watanabe, 2018;  
91 Arlegi et al., 2020). However, use of these indices has been criticized for a lack of clear  
92 statistical justifications; it has not been known—or not widely appreciated by biologists—  
93 exactly what they are designed to measure, beyond the intuitive allusion to eccentricity  
94 mentioned above (Hansen & Houle, 2008; Hansen et al., 2019).

95         Another fundamental issue over the eigenvalue dispersion indices is a virtual lack of  
96 systematic understanding of their sampling properties. In empirical analyses, eigenvalue

97 dispersion indices are calculated from sample covariance or correlation matrices, but interests  
98 will be in making inferences for the underlying populations. For example, interest may be in  
99 detecting the presence of bias in a population, i.e., testing the null hypothesis of sphericity  
100 (no eccentricity). As detailed below, however, sample eigenvalues are always estimated with  
101 error, so that  $V$  and  $V_{rel}$  calculated from them take a positive value, even if the corresponding  
102 population values are 0. In other words, empirical eigenvalue dispersion indices are biased  
103 estimators of the corresponding population values under the null hypothesis. For statistically  
104 justified inferences, it is crucial to capture essential aspects of their sampling distributions,  
105 e.g., expectation and variance.

106         The presence of estimation or sampling bias in eigenvalue dispersion indices has been  
107 well known in the literature (Wagner, 1984; Cheverud et al., 1989; Grabowski & Porto, 2017;  
108 see also Marroig et al., 2012). Simulation-based approaches have been taken to sketch  
109 sampling distributions of eigenvalue dispersion indices and related statistics (Haber, 2011;  
110 Grabowski & Porto, 2017; Machado et al., 2019; Jung et al. 2020). However, these  
111 approaches hardly give any systematic insight beyond the specific conditions considered.  
112 Analytic results should preferably be sought to comprehend the sampling bias and error. In  
113 this regard, it is notable that Wagner (1984) derived the first two moments of eigenvalues of  
114 sample covariance and correlation matrices under the null conditions, proposing to use the  
115 variance of sample eigenvalues obtained from these moments as an estimate of sampling bias  
116 in these conditions. Strictly speaking, however, the variance of a sample eigenvalue is  
117 fundamentally different from the expectation of the eigenvalue variance  $V$ . These quantities  
118 are identical for correlation matrices under the null hypothesis, but this is not the case for  
119 covariance matrices where the covariances between sample eigenvalues cannot be ignored  
120 (see below). Furthermore, Wagner's (1984) results have a few restrictive conditions:  
121 variables to have the means of 0, or equivalently, to be centered at the population mean rather

122 than the sample mean as is done in most empirical analyses (although this was probably  
123 appropriate in the strict context of his theoretical model); and the sample size  $N$  to be equal to  
124 or larger than the number of variables  $p$ , so their applicability to  $p > N$  conditions has not  
125 been demonstrated.

126 In addition to the naïve null condition of no integration, moments under arbitrary  
127 conditions are also desired. Such would be useful in testing hypotheses about the magnitude  
128 (rather than the mere presence/absence) of integration (Harder, 2009; Fornoni et al., 2009)  
129 and comparing the magnitudes between different samples (Cheverud et al., 1989). Also, the  
130 assumption of no covariation is intrinsically inappropriate as a null hypothesis for shape  
131 variables where raw data are transformed in such a way that individual “variables” are  
132 necessarily dependent on one another (e.g., Mitteroecker et al., 2012). For this type of data, a  
133 covariance matrix with an appropriate structure needs to be specified as the null model  
134 representing the intrinsic covariation.

135 This paper addresses the issues over the eigenvalue dispersion indices mentioned  
136 above. It first gives a theoretical overview of these statistics to clarify their statistical  
137 justifications, particularly in connection to the sphericity test in multivariate analysis. Then  
138 exact and approximate expressions are analytically derived for the expectation and variance  
139 of  $V$  and  $V_{\text{rel}}$  of sample covariance and correlation matrices under the null and arbitrary  
140 conditions, assuming the multivariate normality of original variables. These expressions are  
141 derived without any assumption on  $p$  or  $N$ , except for the variance of  $V$  and  $V_{\text{rel}}$  of a  
142 correlation matrix under arbitrary conditions, which is based on a strict large-sample  
143 asymptotic theory. Simulations were subsequently conducted to obtain systematic insights  
144 into sampling properties and to evaluate the accuracy of the approximate expressions.  
145 Potential extensions into shape variables and phylogenetically structured data are briefly  
146 discussed.

147

## 148 **Theory**

### 149 **Preliminaries**

150 For the purpose here, the distinction between population and sample quantities is essential.

151 Corresponding Greek and Latin letters are used as symbols for the former and latter,

152 respectively. Let  $\Sigma$  be the  $p \times p$  population covariance matrix, whose  $(i, j)$ -th component  $\sigma_{ij}$

153 is the population variance ( $i = j$ ) or covariance ( $i \neq j$ ). It is a symmetric, nonnegative

154 definite matrix with the eigendecomposition

$$155 \quad \Sigma = \mathbf{Y}\mathbf{\Lambda}\mathbf{Y}^T, \quad (1)$$

156 where the superscript  $T$  denotes matrix transposition,  $\mathbf{Y}$  is an orthogonal matrix of

157 eigenvectors ( $\mathbf{Y}\mathbf{Y}^T = \mathbf{Y}^T\mathbf{Y} = \mathbf{I}_p$  where  $\mathbf{I}_p$  is the  $p \times p$  identity matrix), and  $\mathbf{\Lambda}$  is a diagonal

158 matrix whose diagonal elements are the eigenvalues  $\lambda_1, \lambda_2, \dots, \lambda_p$  of  $\Sigma$  (population

159 eigenvalues). For convenience, the eigenvalues are arranged in the non-increasing order:

160  $\lambda_1 \geq \lambda_2 \geq \dots \geq \lambda_p \geq 0$ . Let  $\boldsymbol{\mu}$  be the  $p \times 1$  population mean vector.

161 Let  $\mathbf{X}$  be an  $N \times p$  observation matrix consisting of  $p$ -variate observations, which are

162 individually denoted as  $\mathbf{x}_i$  ( $p \times 1$  vector; transposed in the rows of  $\mathbf{X}$ ). (No strict notational

163 distinction is made between a random variable and its realization.) At this point,  $N$

164 observations are assumed to be identically and independently distributed (i.i.d.). The sample

165 covariance matrix  $\mathbf{S}$  and cross-product matrix  $\mathbf{A}$  are defined as

$$166 \quad \mathbf{S} = \frac{1}{n_*} \mathbf{A} = \frac{1}{n_*} (\mathbf{X} - \mathbf{1}_N \bar{\mathbf{x}}^T)^T (\mathbf{X} - \mathbf{1}_N \bar{\mathbf{x}}^T), \quad (2)$$

167 where  $\mathbf{1}_N$  is a  $N \times 1$  column vector of 1's,  $\bar{\mathbf{x}} = \sum_{i=1}^N \mathbf{x}_i / N$  is the sample mean vector, and  $n_*$

168 denotes an appropriate divisor; e.g.,  $n_* = N - 1$  for the ordinary unbiased estimator, and

169  $n_* = N$  for the maximum likelihood estimator under the normal distribution. The  $(i, j)$ -th

170 component of  $\mathbf{S}$ , denoted  $s_{ij}$ , is the sample variance or covariance. The eigendecomposition



171 of  $\mathbf{S}$  is constructed in the same way as above:

$$172 \quad \mathbf{S} = \mathbf{ULU}^T, \quad (3)$$

173 where  $\mathbf{U}$  is an orthogonal matrix of sample eigenvectors and  $\mathbf{L}$  is a diagonal matrix whose  
174 elements are the sample eigenvalues  $l_1, l_2, \dots, l_p$ .

175 In what follows, the following identity entailed by the orthogonality of  $\mathbf{U}$  is frequently  
176 utilized:

$$177 \quad \sum_{i=1}^p s_{ii}^r = \text{tr}(\mathbf{S}^r) = \text{tr}(\mathbf{ULU}^T \mathbf{ULU}^T \dots \mathbf{ULU}^T) = \text{tr}(\mathbf{L}^r) = \sum_{i=1}^p l_i^r, \quad r = 1, 2, \dots, \quad (4)$$

178 where  $\text{tr}(\cdot)$  denotes the matrix trace operator, i.e., summation of the diagonal elements; the  
179 parentheses are omitted for visual clarity when little ambiguity exists. The sum of variances  
180  $\text{tr} \mathbf{S} = \text{tr} \mathbf{L}$  is called total variance. Note that equation 4 holds even when  $n < p$ , in which  
181 case  $l_i = 0$  for some  $i$ . In other words, when  $n < p$ , the sample total variance is in a way  
182 concentrated in a subspace with fewer dimensions than the full space.

183 The population and sample correlation matrices  $\mathbf{P}$  and  $\mathbf{R}$ , whose  $(i, j)$ -th components  
184 are the population and sample correlation coefficients  $\rho_{ij}$  and  $r_{ij}$ , respectively, are obtained  
185 by standardizing  $\mathbf{\Sigma}$  and  $\mathbf{S}$ :

$$186 \quad \mathbf{P} = \text{diag}(\sigma_{ii}^{-1/2}) \mathbf{\Sigma} \text{diag}(\sigma_{ii}^{-1/2}),$$
$$187 \quad \mathbf{R} = \text{diag}(s_{ii}^{-1/2}) \mathbf{S} \text{diag}(s_{ii}^{-1/2}), \quad (5)$$

188 where  $\text{diag}(\cdot)$  stands for the  $p \times p$  diagonal matrix with the designated  $i$ th elements. Their  
189 eigendecomposition is defined as for covariance matrices, and the eigenvalues are denoted  
190 with the same symbols here. For any  $i$ ,  $\rho_{ii} = r_{ii} = 1$ , and hence, for correlation matrices

$$191 \quad \text{tr} \mathbf{P} = \text{tr} \mathbf{\Lambda} = \text{tr} \mathbf{R} = \text{tr} \mathbf{L} = p. \quad (6)$$

192 In what follows, the notations  $E(\cdot)$ ,  $\text{Var}(\cdot)$ , and  $\text{Cov}(\cdot, \cdot)$  are used for the expectation (mean),  
193 variance, and covariance of random variables, respectively.

194

## 195 **Eigenvalue dispersion**

196 The eigenvalue variance  $V$  is defined as:

$$197 \quad V(\mathbf{\Sigma}) = \frac{1}{p} \sum_{i=1}^p (\lambda_i - \bar{\lambda})^2,$$
$$198 \quad V(\mathbf{S}) = \frac{1}{p} \sum_{i=1}^p (l_i - \bar{l})^2, \quad (7)$$

199 where  $\bar{\lambda}$  and  $\bar{l}$  are the averages of the population and sample eigenvalues, respectively ( $\bar{\lambda} =$   
200  $\sum_{i=1}^p \lambda_i / p = \text{tr } \mathbf{\Lambda} / p$ ,  $\bar{l} = \sum_{i=1}^p l_i / p = \text{tr } \mathbf{L} / p$ ). Note that  $V(\mathbf{\Sigma})$  is a quantity pertaining to the  
201 population, whereas  $V(\mathbf{S})$  is a sample statistic. The definition here follows the convention in  
202 the literature that  $p$ , rather than  $p - 1$ , is used as the divisor (e.g., Cheverud et al., 1983;  
203 Pavlicev et al., 2009; Haber, 2011). The latter might be more suitable for  $V(\mathbf{S})$  because the  
204 sum of squares is taken around the average sample eigenvalue which is a random variable.  
205 After all, however, the choice of  $p - 1$  is not so useful because  $V(\mathbf{S})$  cannot be an unbiased  
206 estimator of  $V(\mathbf{\Sigma})$  even with that choice (below).

207 Note that the average and sum of squares are taken across all  $p$  eigenvalues, even if  
208 some eigenvalues are zero due to the condition  $n < p$ . This is reasonable given that sums of  
209 moments across all  $p$  sample eigenvalues are comparable in magnitude to those of population  
210 eigenvalues (see below). One could alternatively use eigenvalue standard deviation  $\sqrt{V}$   
211 (Pavlicev et al., 2009; Haber, 2011), but this study concentrates on  $V$  rather than  $\sqrt{V}$ , because  
212 the former is much more tractable for the purposes of characterizing distributions.

213 It is obvious that  $V(\mathbf{\Sigma})$  takes a single minimum of 0 at  $(\lambda_1, \lambda_2, \dots, \lambda_p) = (\bar{\lambda}, \bar{\lambda}, \dots, \bar{\lambda})$ .  
214 On the other hand, for a fixed  $\bar{\lambda}$ , it takes a single maximum of  $(p - 1)\bar{\lambda}^2$  at  $(p\bar{\lambda}, 0, \dots, 0)$  (e.g.,  
215 Van Valen, 1974; Machado et al., 2019). Hence, not only is  $V(\mathbf{\Sigma})$  scale-variant, but also its  
216 range depends on  $p - 1$ . Therefore, it is often useful to standardize  $V$  by division with this  
217 maximum to obtain the relative eigenvalue variance  $V_{\text{rel}}$ :

$$\begin{aligned} 218 \quad V_{\text{rel}}(\mathbf{\Sigma}) &= \frac{\sum_{i=1}^p (\lambda_i - \bar{\lambda})^2}{p(p-1) \bar{\lambda}^2}, \\ 219 \quad V_{\text{rel}}(\mathbf{S}) &= \frac{\sum_{i=1}^p (l_i - \bar{l})^2}{p(p-1) \bar{l}^2}. \end{aligned} \quad (8)$$

220 Because of the standardization,  $V_{\text{rel}}$  ranges between 0 and 1. This is a heuristic introduction  
221 of  $V_{\text{rel}}$  from  $V$ , but it will be seen below that  $V_{\text{rel}}(\mathbf{S})$  has a clearer theoretical justification.

222 These indices are similarly defined for correlation matrices. By noting  $\bar{\lambda} = \bar{l} = 1$  (eq.  
223 6), these are

$$\begin{aligned} 224 \quad V(\mathbf{P}) &= \frac{1}{p} \sum_{i=1}^p (\lambda_i - 1)^2, \\ 225 \quad V(\mathbf{R}) &= \frac{1}{p} \sum_{i=1}^p (l_i - 1)^2. \\ 226 \quad V_{\text{rel}}(\mathbf{P}) &= \frac{\sum_{i=1}^p (\lambda_i - 1)^2}{p(p-1)}, \\ 227 \quad V_{\text{rel}}(\mathbf{R}) &= \frac{\sum_{i=1}^p (l_i - 1)^2}{p(p-1)}. \end{aligned} \quad (9)$$

228 In most of the following discussions, we will concentrate on  $V_{\text{rel}}$  for correlation matrices,  
229 because  $V(\mathbf{R})$  and  $V_{\text{rel}}(\mathbf{R})$  are proportional to each other by the factor  $p - 1$ , and hence their  
230 distributions are identical up to this scaling. This is in contrast to those of covariance  
231 matrices, where  $\bar{l}$  in the denominator in  $V_{\text{rel}}(\mathbf{S})$  is a random variable and affects sampling  
232 properties.

233 Importantly, a single value of  $V_{\text{rel}}$  in general corresponds to multiple combinations of  
234 eigenvalues even if the average eigenvalue is fixed, except when  $p = 2$  or under the extreme  
235 conditions  $V_{\text{rel}} = 0$  and  $V_{\text{rel}} = 1$  (Fig. 1). As such, it is not always straightforward to discern  
236 how intermediate values of  $V_{\text{rel}}$  are translated into actual covariance structures when  $p > 2$ .  
237 Nevertheless, it is possible to show that  $V_{\text{rel}} > 0.5$  cannot happen when multiple leading  
238 eigenvalues are of the same magnitude (Appendix A); in other words, such a large value  
239 indicates dominance of the first principal component.

240 As would be obvious from the definition,  $V$  and  $V_{\text{rel}}$  of covariance matrices only  
241 describe the (relative) magnitudes of eigenvalues—proportions of the axes of variation—and  
242 do not reflect any information of eigenvectors—directions of the axes. A large eigenvalue of  
243 a covariance matrix can represent, e.g., strong covariation between equally varying traits or  
244 large variation of a single trait uncorrelated with others; either of these cases describes  
245 eccentricity of variation in the multivariate space. By contrast, a large eigenvalue of a  
246 correlation matrix can only happen in the presence of correlation. Therefore, a large  
247 eigenvalue dispersion in a correlation matrix constrains conformation of eigenvectors to a  
248 certain extent. The correlations can nevertheless be realized in various ways depending on  
249 eigenvectors, whose conformation does influence the sampling distribution of  $V_{\text{rel}}(\mathbf{R})$  (see  
250 below).

251 For covariance matrices,  $V_{\text{rel}}(\mathbf{S})$  has a natural relation to the test of sphericity, i.e., test  
252 of the null hypothesis that  $\mathbf{\Sigma} = \sigma^2 \mathbf{I}_p$  for an arbitrary positive constant  $\sigma^2$ . Simple  
253 transformations from equation 8 lead to

$$253 \quad V_{\text{rel}}(\mathbf{S}) = \frac{1}{p-1} \left( p \frac{\sum l_i^2}{(\sum l_i)^2} - 1 \right). \quad (10)$$

255 By noting  $\sum l_i^2 / (\sum l_i)^2 = \text{tr}(\mathbf{S}^2) / (\text{tr} \mathbf{S})^2 = \text{tr}(\mathbf{A}^2) / (\text{tr} \mathbf{A})^2$  (see eqs. 2 and 4),  $V_{\text{rel}}(\mathbf{S})$  in the  
256 form of equation 10 is exactly John's (1972)  $T$  statistic for the test of sphericity (see also  
257 Ledoit & Wolf, 2002). Beyond the intuition that it measures eccentricity of variation along  
258 principal components, this statistic (and its linear functions) can be justified as the most  
259 powerful test statistic in the proximity of the null hypothesis under multivariate normality,  
260 among the class of such statistics that are invariant against translation by a constant vector,  
261 uniform scaling, and orthogonal rotation (John, 1971, 1972; Sugiura, 1972; Nagao, 1973). On  
262 the other hand,  $V(\mathbf{S})$  does not seem to have as much theoretical justification, but rather has a

264 practical advantage in the tractability of its moments and ease of correcting sampling bias  
265 (see below).

266 For a correlation matrix,  $V_{\text{rel}}$  is a measure of association between variables. Following  
267 similar transformations, it is straightforward to see

$$\begin{aligned} 274 \quad V_{\text{rel}}(\mathbf{R}) &= \frac{\text{tr}(\mathbf{R}^2) - p}{p(p-1)} \\ 275 \quad &= \frac{2}{p(p-1)} \sum_{i < j}^p r_{ij}^2, \end{aligned} \tag{11}$$

269 because  $r_{ii}^2 = 1$  for all  $i$ . This relationship has been known in the statistical literature (e.g.,  
270 Gleason & Staelin, 1975; Durand & Le Roux, 2017), and empirically confirmed by Haber  
271 (2011). This statistic is used as a measure of overall association between variables (e.g.,  
272 Schott, 2005; Durand & Le Roux, 2017), with the corresponding null hypothesis being  $\mathbf{P} =$   
273  $\mathbf{I}_p$ .

276

### 277 **Sampling properties of eigenvalues**

278 The distribution of eigenvalues of  $\mathbf{S}$ , or equivalently those of  $\mathbf{A}$  (which are  $n_*$  times those of  
279  $\mathbf{S}$ ), has been extensively investigated in the literature of multivariate analysis (see, e.g.,  
280 Jolliffe, 2002; Anderson, 2003). Unfortunately, however, most of such results are of limited  
281 value for the present purposes. On the one hand, forms of the exact joint distribution of the  
282 eigenvalues of  $\mathbf{A}$  are known under certain assumptions on the population eigenvalues (e.g.,  
283 Muirhead, 1982: pp. 107, 388), but they do not allow for much intuitive interpretation (let  
284 alone direct evaluation of moments), apart from the following points: 1) sample eigenvalues  
285 are *not* stochastically independent from one another; and 2) the distribution of sample  
286 eigenvalues are only dependent on the population eigenvalues, but not on the population

287 eigenvectors. On the other hand, a substantial body of results is available for large-sample  
288 asymptotic distributions of sample eigenvalues (assuming  $n \rightarrow \infty$ ,  $p$  being constant; e.g.,  
289 Anderson, 1963, 2003), but their accuracy under finite  $n$  conditions is questionable. For  
290 example, a well-known result under a certain simple condition states that  $l_i \sim N(\lambda_i, 2\lambda_i^2/n)$   
291 and  $\text{Cov}(l_i, l_j) \approx 0$  for  $i \neq j$ , assuming all population eigenvalues to be distinct and  $n_* = n$   
292 (Girshick, 1939; Anderson, 1963; Srivastava & Khatri, 1979). However, these expressions  
293 ignore terms of order  $O(n^{-1})$ —that is, all terms with  $n$  or its higher power in the  
294 denominator—whose magnitude can be substantial for a finite  $n$ . Indeed, with further  
295 evaluation of higher-order terms, it becomes evident that sample eigenvalues are biased  
296 estimators of the population equivalents, where large eigenvalues are prone to overestimation  
297 and small ones are prone to underestimation, and that  $\text{Cov}(l_i, l_j) = 2\lambda_i\lambda_j/[(\lambda_i - \lambda_j)n]^2 +$   
298  $O(n^{-3})$  for  $i \neq j$  (Lawley, 1956; Srivastava & Khatri, 1979). An important insight is that  
299 covariance between sample eigenvalues is nonzero. When all population eigenvalues are  
300 equal, then  $\text{Cov}(l_i, l_j) = -\sigma^4/n$  (Girshick, 1939).

301       Much less is known about eigenvalues of a sample correlation matrix  $\mathbf{R}$  (Jolliffe,  
302 2002). Their distribution seems intractable except under certain special conditions (Anderson,  
303 1963). Asymptotic results indicate that the limiting distribution ( $n \rightarrow \infty$ ) of an eigenvalue of  
304  $\mathbf{R}$  is normal with the mean coinciding with the corresponding population eigenvalue, but that  
305 its variance depends on population eigenvectors (Anderson, 1963; Konishi, 1979), unlike that  
306 of a covariance matrix where the distribution does not depend on population eigenvectors  
307 (above).

308       It is often of practical interest to detect the presence of eccentricity or integration, i.e.,  
309 to test the null hypothesis of sphericity  $\mathbf{\Sigma} = \sigma^2\mathbf{I}_p$  or no correlation  $\mathbf{P} = \mathbf{I}_p$ . These hypotheses  
310 are equivalent to  $V(\mathbf{\Sigma}) = V_{\text{rel}}(\mathbf{\Sigma}) = 0$  and  $V_{\text{rel}}(\mathbf{P}) = 0$ , respectively. Even under these  
311 conditions, nonzero sampling variance in sample eigenvalues renders  $V(\mathbf{S}) > 0$ ,  $V_{\text{rel}}(\mathbf{S}) > 0$ ,

312 and  $V_{\text{rel}}(\mathbf{R}) > 0$  with probability 1, because these statistics are calculated from sum of  
 313 squares. The primary aim here is to derive explicit expressions for this sampling bias  
 314 (expectation), as well as sampling variance.

315 It should be remembered that the expectation of the eigenvalue variance  $E[V(\mathbf{S})]$  is  
 316 fundamentally different from the variance of eigenvalues  $\text{Var}(l_i)$ . This point will be clarified  
 317 by the following transformation:

$$\begin{aligned}
 326 \quad E[V(\mathbf{S})] &= \frac{1}{p} E\left(\sum_{i=1}^p l_i^2\right) - \frac{1}{p^2} E\left[\left(\sum_{i=1}^p l_i\right)^2\right] \\
 327 \quad &= \frac{p-1}{p^2} \sum_{i=1}^p E(l_i^2) - \frac{1}{p^2} \sum_{i \neq j}^p [E(l_i)E(l_j) + \text{Cov}(l_i, l_j)].
 \end{aligned}$$

318 (12)

319 Under the null hypothesis, the moments are equal across all  $i$ , and the above simplifies into

$$320 \quad \frac{p-1}{p} [\text{Var}(l_i) - \text{Cov}(l_i, l_j)], i \neq j. \tag{13}$$

321 If  $\text{Cov}(l_i, l_j)$  were zero, the expectation would coincide with  $(p-1)\text{Var}(l_i)/p$ , which can be  
 322 evaluated from, e.g., Wagner's (1984) results. As already mentioned, however, this  
 323 covariance is nonzero and hence cannot be ignored for covariance matrices. This is unlike the  
 324 case for correlation matrices, where  $E[V(\mathbf{R})] = \text{Var}(l_i)$  holds under the null hypothesis,  
 325 because  $\bar{l}$  is a constant and equals  $E(l_i) = 1$ .

328 In the following discussions on moments of eigenvalue dispersion indices,  
 329 observations are assumed to be i.i.d. multivariate normal variables. If the  $N \times p$  matrix  $\mathbf{X}$   
 330 consists of  $N$  i.i.d.  $p$ -variate normal variables  $\mathbf{x}_i \sim N_p(\boldsymbol{\mu}, \boldsymbol{\Sigma})$ , then the distribution of the  
 331 sample-mean-centered cross product matrix  $\mathbf{A}$  (eq. 2) is said to be the (central) Wishart  
 332 distribution  $W_p(\boldsymbol{\Sigma}, n)$ , where  $n = N - 1$  is the degree of freedom. It is well known that this is  
 333 identical to the distribution of  $\mathbf{Z}^T \mathbf{Z}$ , where the  $n \times p$  matrix  $\mathbf{Z}$  consists of  $n$  i.i.d.  $p$ -variate

334 normal variables  $\mathbf{z}_i \sim N_p(\mathbf{0}_p, \mathbf{\Sigma})$  with  $\mathbf{0}_p$  being the  $p \times 1$  column vector of 0's (e.g., Anderson,  
 335 2003). Therefore, for analyzing statistics associated with sample covariance or correlation  
 336 matrices, we can conveniently consider

$$337 \quad \mathbf{S} = \frac{1}{n_*} \mathbf{Z}^T \mathbf{Z}. \quad (14)$$

338 without loss of generality, by bearing in mind the distinction between the degree of freedom  
 339  $n$  and sample size  $N$ . From elementary moments of the normal distribution, the following  
 340 general relationships can be easily confirmed

$$341 \quad E(s_{ij}) = \frac{1}{n_*} \sum_{k=1}^n E(z_{ki} z_{kj}) = \frac{n}{n_*} \sigma_{ij},$$

$$342 \quad E(s_{ij} s_{km}) = \frac{n^2}{n_*^2} \left[ \sigma_{ij} \sigma_{km} + \frac{1}{n} (\sigma_{ik} \sigma_{jm} + \sigma_{im} \sigma_{jk}) \right]. \quad (15)$$

343 where  $z_{ij}$ ,  $s_{ij}$ ,  $\sigma_{ij}$  and the like are the  $(i, j)$ -th elements of  $\mathbf{Z}$ ,  $\mathbf{S}$ , and  $\mathbf{\Sigma}$ , respectively.

344

### 345 **Moments under null hypotheses**

#### 346 *Covariance matrix*

347 Before proceeding to arbitrary covariance structures, let us consider the null hypothesis of  
 348 sphericity:  $\mathbf{\Sigma} = \sigma^2 \mathbf{I}_p$ , where  $\sigma^2$  is the population variance of arbitrary magnitude. For the  
 349 expectation of  $V(\mathbf{S})$ , we need  $\text{Var}(l_i)$  and  $\text{Cov}(l_i, l_j)$ , or equivalently  $E(\sum_{i=1}^p l_i^2)$  and

350  $E\left[\left(\sum_{i=1}^p l_i\right)^2\right]$  (see eqs. 12 and 13); we will proceed with the latter here. By use of equations 4

351 and 15, we have

$$352 \quad E\left(\sum_{i=1}^p l_i^2\right) = E\left(\sum_{i,j=1}^p s_{ij}^2\right)$$

$$353 \quad = E\left(\sum_{i=1}^p s_{ii}^2 + \sum_{i \neq j}^p s_{ij}^2\right)$$

$$354 \quad = [pE(s_{ii}^2) + p(p-1)E(s_{ij}^2)]$$



$$\begin{aligned}
 362 \quad &= \frac{pn}{n_*^2} (p + n + 1) \sigma^4, \\
 365 \quad & \hspace{15em} (16)
 \end{aligned}$$

356 and similarly

$$\begin{aligned}
 363 \quad & \mathbb{E} \left[ \left( \sum_{i=1}^p l_i \right)^2 \right] = \mathbb{E} \left[ \left( \sum_{i=1}^p s_{ii} \right)^2 \right] \\
 364 \quad &= \mathbb{E} \left[ \sum_{i=1}^p s_{ii}^2 + \sum_{i \neq j}^p s_{ii} s_{jj} \right] \\
 365 \quad &= [p \mathbb{E}(s_{ii}^2) + p(p-1) \mathbb{E}(s_{ii} s_{jj})] \\
 366 \quad &= \frac{pn}{n_*^2} (pn + 2) \sigma^4. \\
 367 \quad & \hspace{15em} (17)
 \end{aligned}$$

358 Then, inserting these results into equation 12,

$$\begin{aligned}
 367 \quad & \mathbb{E}[V(\mathbf{S})] = \frac{n}{pn_*^2} (p-1)(p+2) \sigma^4. \\
 359 \quad & \hspace{15em} (18)
 \end{aligned}$$

360 Alternatively, it could be seen that  $\text{Var}(l_i) = n(p+1)\sigma^2/n_*^2$  and  $\text{Cov}(l_i, l_j) = -n\sigma^4/n_*^2$   
 361 for  $i \neq j$ , with which equation 13 yields the identical result.

368 The variance of  $V(\mathbf{S})$  is, by equation 12,

$$\begin{aligned}
 373 \quad & \text{Var}[V(\mathbf{S})] = \frac{1}{p^2} \text{Var} \left[ \sum_{i=1}^p l_i^2 \right] + \frac{1}{p^4} \text{Var} \left[ \left( \sum_{i=1}^p l_i \right)^2 \right] - 2 \frac{1}{p^3} \text{Cov} \left[ \sum_{i=1}^p l_i^2, \left( \sum_{i=1}^p l_i \right)^2 \right]. \\
 369 \quad & \hspace{15em} (19)
 \end{aligned}$$

370 The relevant moments can most conveniently be found as a special case of general  
 371 expressions under arbitrary  $\Sigma$  (see below and Appendix B), although direct derivation using  
 372 normal moments is possible:

$$\begin{aligned}
 377 \quad E \left[ \left( \sum l_i^2 \right)^2 \right] &= \frac{pn}{n_*^4} (p^3n + pn^3 + 2p^2n^2 + 2p^2n + 2pn^2 + 8p^2 + 8n^2 + 21pn \\
 378 \quad &\quad + 20p + 20n + 20)\sigma^8; \\
 379 \quad E \left[ \left( \sum l_i \right)^4 \right] &= \frac{pn}{n_*^4} (pn + 2)(pn + 4)(pn + 6)\sigma^8; \\
 380 \quad E \left[ \left( \sum l_i^2 \right) \cdot \left( \sum l_i \right)^2 \right] &= \frac{pn}{n_*^4} (pn + 2)(pn + 4)(p + n + 1)\sigma^8; \\
 381 \quad \text{Var} \left[ \sum l_i^2 \right] &= \frac{4pn}{n_*^4} (2p^2 + 2n^2 + 5pn + 5p + 5n + 5)\sigma^8; \\
 382 \quad \text{Var} \left[ \left( \sum l_i \right)^2 \right] &= \frac{8pn}{n_*^4} (pn + 2)(pn + 3)\sigma^8; \\
 383 \quad \text{Cov} \left[ \sum l_i^2, \left( \sum l_i \right)^2 \right] &= \frac{8pn}{n_*^4} (p + n + 1)(pn + 3)\sigma^8. \\
 374 \quad &\hspace{20em} (20)
 \end{aligned}$$

375 Inserting these into equation 19 yields

$$376 \quad \text{Var}[V(\mathbf{S})] = \frac{4n}{p^3n_*^4} (p - 1)(p + 2)(2p^2 + pn + 3p - 6)\sigma^8. \quad (21)$$

384 Next, consider the first two moments of  $V_{\text{rel}}(\mathbf{S})$  under the null hypothesis (which have  
 385 previously been derived by John [1972]). Recalling the form of equation 10,

$$\begin{aligned}
 386 \quad E[V_{\text{rel}}(\mathbf{S})] &= \frac{1}{p-1} \left( p E \left[ \frac{\sum l_i^2}{(\sum l_i)^2} \right] - 1 \right), \\
 387 \quad \text{and} \quad \text{Var}[V_{\text{rel}}(\mathbf{S})] &= \left( \frac{p}{p-1} \right)^2 \text{Var} \left[ \frac{\sum l_i^2}{(\sum l_i)^2} \right]. \quad (22)
 \end{aligned}$$

388 In general, moments of the ratio  $\sum l_i^2 / (\sum l_i)^2$  do not coincide with the ratio of the moments  
 389 of the numerator and denominator. Specifically under the null hypothesis, however,

$$\begin{aligned}
 390 \quad E \left[ \frac{\sum l_i^2}{(\sum l_i)^2} \right] &= \frac{E[\sum l_i^2]}{E[(\sum l_i)^2]} \\
 391 \quad \text{and} \quad E \left[ \frac{(\sum l_i^2)^2}{(\sum l_i)^4} \right] &= \frac{E[(\sum l_i^2)^2]}{E[(\sum l_i)^4]} \quad (23)
 \end{aligned}$$

392 hold because of the stochastic independence between  $\sum l_i^2 / (\sum l_i)^2$  and  $\sum l_i$  in this special

393 condition (this point requires inspection of the density; John, 1972). Therefore, by use of  
 394 equations 16, 17, and 20,

$$\begin{aligned}
 400 \quad E[V_{\text{rel}}(\mathbf{S})] &= \frac{1}{p-1} \left( p \frac{E[\sum l_i^2]}{E[(\sum l_i)^2]} - 1 \right) \\
 401 \quad &= \frac{p+2}{pn+2},
 \end{aligned}
 \tag{24}$$

396 and

$$\begin{aligned}
 402 \quad \text{Var}[V_{\text{rel}}(\mathbf{S})] &= \left( \frac{p}{p-1} \right)^2 \left( \frac{E[(\sum l_i^2)^2]}{E[(\sum l_i)^4]} - \left\{ \frac{E[\sum l_i^2]}{E[(\sum l_i)^2]} \right\}^2 \right) \\
 403 \quad &= \frac{4(p-1)(p+2)(n-1)(n+2)}{(pn+2)^2(pn+4)(pn+6)}.
 \end{aligned}
 \tag{25}$$

398 These results are non-asymptotic (valid across any  $p$  and  $n$ ) and exact under multivariate  
 399 normality.

404

#### 405 *Correlation matrix*

406 Consider the null hypothesis  $\mathbf{P} = \mathbf{I}_p$  or  $\rho_{ij} = 0$  for  $i \neq j$ . The moments can conveniently be

407 obtained from the form of average squared correlation (eq. 11). It is well known that, under

408 the assumptions of normality and  $\rho_{ij} = 0$  for  $i \neq j$ ,  $r_{ij}^2$  is distributed as

409 Beta( $1/2, (n-1)/2$ ), where  $n$  is the degree of freedom (e.g., Anderson, 2003). Therefore,

410 under the null hypothesis,

$$\begin{aligned}
 411 \quad E(r_{ij}^2) &= \frac{1}{n}, \quad i \neq j, \\
 412 \quad \text{Var}(r_{ij}^2) &= \frac{2(n-1)}{n^2(n+2)}, \quad i \neq j.
 \end{aligned}
 \tag{26}$$

413 The expectation of  $V_{\text{rel}}(\mathbf{R})$  is simply the average:

420 
$$E[V_{\text{rel}}(\mathbf{R})] = \frac{1}{n}.$$

414 (27)

415 This expression is identical to  $(p - 1)^{-1}\text{Var}(l_i)$  obtainable from Wagner's (1984) results,  
 416 except for having the degree of freedom  $n$  rather than the sample size  $N$  in the denominator.  
 417 This is because Wagner (1984) considered  $N$  uncentered observations with mean 0 without  
 418 explicitly distinguishing  $n$  and  $N$ . Most practical analyses would concern data centered at the  
 419 sample mean, thus should use  $n$  rather than  $N$ .

421 Derivation of the variance is more complicated than it may seem, because, in  
 422 principle,

429 
$$\text{Var}[V_{\text{rel}}(\mathbf{R})] = \frac{4}{p^2(p-1)^2} \left[ \sum_{i < j} \text{Var}(r_{ij}^2) + \sum_{\substack{i < j, k < l, \\ (i,j) \neq (k,l)}} 2\text{Cov}(r_{ij}^2, r_{kl}^2) \right].$$

423 (28)

424 However, it is possible to show  $\text{Cov}(r_{ij}^2, r_{kl}^2) = 0$  under the null hypothesis (Appendix C).  
 425 Therefore, from equations 26 and 28,

426 
$$\text{Var}[V_{\text{rel}}(\mathbf{R})] = \frac{4(n-1)}{p(p-1)n^2(n+2)}.$$

427 (29)

427 These expressions are non-asymptotic and exact for any  $p$  and  $n$ . Schott (2005) proposed a  
 428 test for independence between sets of normal variables based on these moments.

430

### 431 **Moments under arbitrary conditions**

#### 432 *Covariance matrix*

433 This section considers moments of eigenvalue dispersion indices under arbitrary  
 434 covariance/correlation structures and multivariate normality. It is straightforward to obtain  
 435 the first two moments of  $V(\mathbf{S})$  under arbitrary  $\Sigma$ , provided that the expectations of relevant  
 436 terms in equation 12 are available. The results are

$$\begin{aligned}
 444 \quad E[V(\mathbf{S})] &= \frac{n}{p^2 n_*^2} [(p-n)(\text{tr } \mathbf{\Lambda})^2 + (pn+p-2) \text{tr}(\mathbf{\Lambda}^2)] \\
 445 \quad &= \frac{n}{pn_*^2} [(pn+p-2)V(\mathbf{\Sigma}) + (p-1)(p+2)(\text{tr } \mathbf{\Lambda})^2/p^2], \\
 446 \quad \text{Var}[V(\mathbf{S})] &= \frac{4n}{p^4 n_*^4} \{2(p-n)^2 \text{tr}(\mathbf{\Lambda}^2) (\text{tr } \mathbf{\Lambda})^2 + (p^2 n + p^2 - 4p + 2n)[\text{tr}(\mathbf{\Lambda}^2)]^2 \\
 447 \quad &\quad + 4(p-n)(pn+p-2) \text{tr}(\mathbf{\Lambda}^3) \text{tr } \mathbf{\Lambda} \\
 448 \quad &\quad + (2p^2 n^2 + 5p^2 n + 5p^2 - 12pn - 12p + 12) \text{tr}(\mathbf{\Lambda}^4)\}. \\
 437 \quad & \tag{30}
 \end{aligned}$$

438 The derivations are given in Appendix B. The second expression for the expectation comes  
 439 from the fact  $V(\mathbf{\Sigma}) = [p \text{tr}(\mathbf{\Lambda}^2) - (\text{tr } \mathbf{\Lambda})^2]/p^2$ , and clarifies that the expectation is a linear  
 440 function of  $V(\mathbf{\Sigma})$ . These results are exact, and it can be easily verified that they reduce to  
 441 equations 18 and 19 under the null hypothesis. Profiles of  $E[V(\mathbf{S})]$  across a range of  $V(\mathbf{\Sigma})$  are  
 442 shown in Figure 2 (top row), under single large eigenvalue conditions with varying  $p$  and  $N$   
 443 and a fixed  $\text{tr } \mathbf{\Sigma}$  (details are described under simulation settings below).

449 Moments of  $V_{\text{rel}}(\mathbf{S})$  are more difficult to obtain, as moments of the ratio  $\sum l_i^2 / (\sum l_i)^2$   
 450 do not coincide with the ratio of moments under arbitrary  $\mathbf{\Sigma}$ . Here we utilize the following  
 451 approximations based on the delta method (e.g., Stuart & Ord, 1994: chapter 10):

$$\begin{aligned}
 452 \quad E\left(\frac{X}{Y}\right) &\approx \frac{E(X)}{E(Y)} - \frac{\text{Cov}(X,Y)}{E(Y)^2} + \frac{E(X) \text{Var}(Y)}{E(Y)^3}, \\
 453 \quad \text{and} \quad \text{Var}\left(\frac{X}{Y}\right) &\approx \frac{E(X)^2}{E(Y)^2} \left[ \frac{\text{Var}(X)}{E(X)^2} + \frac{\text{Var}(Y)}{E(Y)^2} - 2 \frac{\text{Cov}(X,Y)}{E(X)E(Y)} \right]. \tag{32}
 \end{aligned}$$

454 The approximate moments are (Appendix B):

$$\begin{aligned}
 455 \quad E\left[\frac{\sum l_i^2}{(\sum l_i)^2}\right] &\approx \frac{(\text{tr } \mathbf{\Lambda})^2 + (n+1) \text{tr}(\mathbf{\Lambda}^2)}{n(\text{tr } \mathbf{\Lambda})^2 + 2 \text{tr}(\mathbf{\Lambda}^2)} - \frac{8(n-1)(n+2)}{n[n(\text{tr } \mathbf{\Lambda})^2 + 2 \text{tr}(\mathbf{\Lambda}^2)]^3} \\
 456 \quad &\times \{n(\text{tr } \mathbf{\Lambda})^3 \text{tr}(\mathbf{\Lambda}^3) - n(\text{tr } \mathbf{\Lambda})^2 [\text{tr}(\mathbf{\Lambda}^2)]^2 - 2[\text{tr}(\mathbf{\Lambda}^2)]^3 - 2 \text{tr } \mathbf{\Lambda} \text{tr}(\mathbf{\Lambda}^2) \text{tr}(\mathbf{\Lambda}^3) \\
 457 \quad &\quad + 3(\text{tr } \mathbf{\Lambda})^2 \text{tr}(\mathbf{\Lambda}^4)\};
 \end{aligned}$$

$$\begin{aligned}
 466 \quad \text{Var} \left[ \frac{\sum l_i^2}{(\sum l_i)^2} \right] &\approx \frac{4(n-1)(n+2)}{n[n(\text{tr } \mathbf{\Lambda})^2 + 2 \text{tr}(\mathbf{\Lambda}^2)]^4} \\
 467 \quad &\times \{n(\text{tr } \mathbf{\Lambda})^4 [\text{tr}(\mathbf{\Lambda}^2)]^2 + 2n(n+1)(\text{tr } \mathbf{\Lambda})^2 [\text{tr}(\mathbf{\Lambda}^2)]^3 + 2(n+1)[\text{tr}(\mathbf{\Lambda}^2)]^4 \\
 468 \quad &- 4(n-1)(n+2)(\text{tr } \mathbf{\Lambda})^3 \text{tr}(\mathbf{\Lambda}^2) \text{tr}(\mathbf{\Lambda}^3) + (2n^2 + 3n - 6)(\text{tr } \mathbf{\Lambda})^4 \text{tr}(\mathbf{\Lambda}^4) \\
 469 \quad &- 4n(\text{tr } \mathbf{\Lambda})^2 \text{tr}(\mathbf{\Lambda}^2) \text{tr}(\mathbf{\Lambda}^4) - 4(\text{tr } \mathbf{\Lambda})^4 [\text{tr}(\mathbf{\Lambda}^2)]^2\}. \\
 458 \quad & \tag{33}
 \end{aligned}$$

459 Inserting these into equation 22 yields the desired moments. The approximate expectation  
 460 reduces to equation 24 under the null hypothesis, as the higher-order terms cancel out,  
 461 whereas this is not the case for the approximate variance. Because these expressions are  
 462 specified only by the population eigenvalues regardless of eigenvectors, they are invariant  
 463 with respect to orthogonal rotations, as expected from theoretical considerations above. Also,  
 464 it is easily discerned that these expressions are invariant with respect to uniform scaling of  
 465 the variables. The accuracy of these approximations will be examined in simulations below.

470 Profiles of the approximation of  $E[V_{\text{rel}}(\mathbf{S})]$  across a range of  $V_{\text{rel}}(\mathbf{\Sigma})$  are shown in  
 471 Figure 2 (middle row) for the same conditions as explained above. The profiles are nonlinear;  
 472  $V_{\text{rel}}(\mathbf{S})$  tends to overestimate  $V_{\text{rel}}(\mathbf{\Sigma})$  when the latter is small, but tends to slightly  
 473 underestimate when the latter is large. The initial decrease of  $E[V_{\text{rel}}(\mathbf{S})]$  observed in some  
 474 profiles appears to be an artifact of the approximation.

475  
 476 *Correlation matrix*

477 The expectation of  $V_{\text{rel}}(\mathbf{R})$  under arbitrary conditions can be obtained from the expression of  
 478 equation 11 with  $r_{ij}^2$  replaced by its expectations, which is known to be (e.g., Ghosh, 1966;  
 479 Muirhead, 1982)

$$480 \quad E(r_{ij}^2) = 1 - \frac{(n-1)(1-\rho_{ij}^2)}{n} {}_2F_1 \left( 1, 1; \frac{n+2}{2}; \rho_{ij}^2 \right), \quad i \neq j, \tag{34}$$

481 where

482 
$${}_2F_1(a, b; c; z) = \sum_{k=0}^{\infty} \frac{(a)_k (b)_k}{(c)_k} \frac{z^k}{k!} \quad (35)$$

483 is the hypergeometric function, with  $(x)_k = x(x+1) \dots (x+k-1)$  denoting rising factorial  
 484 (defined to be 1 when  $k=0$ ). Taking the average of equation 34 gives the desired  
 485 expectation. This result is non-asymptotic and exact. It is easily seen that equation 34 reduces  
 486 to equation 26 under the null hypothesis.

487 When  $p=2$ , the exact variance of  $V_{\text{rel}}(\mathbf{R})$  is equal to that of the single squared  
 488 correlation coefficient, thus can be obtained from known results (Ghosh, 1966) as follows:

489 
$$\text{Var}[V_{\text{rel}}(\mathbf{R})] = \text{Var}(r^2) = \frac{(n-1)(n+1)(1-\rho^2)}{2n} \left[ F - nF' - \frac{2(n-1)(1-\rho^2)}{n(n+1)} F^2 \right], \quad (36)$$

490 where  $F = {}_2F_1(1, 1; (n+2)/2; \rho^2)$  and  $F' = (F-1)/2\rho^2 = {}_2F_1(1, 2; (n+4)/2; \rho^2)/(n+2)$ ;  
 491 this last form is preferred to avoid numerical instability when  $\rho^2$  is close to 0. This  
 492 expression reduces to equation 26 under the null hypothesis. When  $p > 2$ , we cannot ignore  
 493 the covariance between squared correlation coefficients (see eq. 28), which appears to be  
 494 nonzero. Unfortunately, no exact expression seems available for this in the literature, so we  
 495 resort to asymptotic results. The following asymptotic expression based on Konishi's (1979)  
 496 theory may potentially be used (see Appendix D for derivation):

504 
$$\text{Var}[V_{\text{rel}}(\mathbf{R})] \approx \frac{8}{p^2(p-1)^2n} \sum_{\alpha, \beta=1}^p \lambda_{\alpha}^2 \lambda_{\beta}^2 \left[ \delta_{\alpha\beta} - (\lambda_{\alpha} + \lambda_{\beta}) \sum_{i=1}^p v_{i\alpha}^2 v_{i\beta}^2 + \sum_{i,j=1}^p \rho_{ij}^2 v_{i\alpha}^2 v_{j\beta}^2 \right],$$

497 (37)

498 where  $\delta_{ij}$  is the Kronecker delta (equals 1 for  $i=j$  and 0 otherwise) and  $v_{i\alpha}$  is the  $(i, \alpha)$ -th  
 499 element of the population eigenvector matrix  $\mathbf{Y}$ . For  $p=2$ , the accuracy of this expression  
 500 can be compared with the exact expression (Fig. 3); visual inspection of the profiles suggest  
 501 that the accuracy is satisfactory past  $N=32-64$ , except around  $V_{\text{rel}}(\mathbf{P})=0$  where the  
 502 asymptotic expression diminishes to 0. For  $p > 2$ , the accuracy is to be evaluated with  
 503 simulations below.

505 Importantly, the expectation of  $V_{\text{rel}}(\mathbf{R})$  is functions of  $\rho^2$ 's rather than  $\mathbf{\Lambda}$ , and cannot

506 be specified by the latter alone in general. For instance, consider  $\begin{pmatrix} 1 & 0.9 & 0 \\ 0.9 & 1 & 0 \\ 0 & 0 & 1 \end{pmatrix}$  and

507  $\begin{pmatrix} 1 & 0.9/\sqrt{2} & 0 \\ 0.9/\sqrt{2} & 1 & 0.9/\sqrt{2} \\ 0 & 0.9/\sqrt{2} & 1 \end{pmatrix}$ , both of which are valid correlation matrices. These matrices

508 have identical eigenvalues  $\mathbf{\Lambda} = \text{diag}(1.9, 1.0, 0.1)$  and hence an identical value of  $V_{\text{rel}}(\mathbf{P}) (=$

509 0.27), but  $E[V_{\text{rel}}(\mathbf{R})]$  with  $n = 10$  are 0.3326 and 0.3156, respectively. Although the

510 difference in the expectations decreases as  $n$  increases, this example highlights that the

511 distribution of  $V_{\text{rel}}(\mathbf{R})$  is also dependent on population eigenvectors.

512 Profiles of  $E[V_{\text{rel}}(\mathbf{R})]$  across a range of  $V_{\text{rel}}(\mathbf{P})$  are shown in Figure 2 (bottom row),

513 under the same conditions as above. These conditions with single large eigenvalues are

514 special cases in which  $E[V_{\text{rel}}(\mathbf{R})]$  can be specified by  $V_{\text{rel}}(\mathbf{P})$  regardless of eigenvectors

515 (detailed in Appendix A). Indeed, the profiles of the expectations are invariant across  $p$  in

516 these special conditions. In some way similar to  $V_{\text{rel}}(\mathbf{S})$ ,  $V_{\text{rel}}(\mathbf{R})$  tends to overestimate and

517 underestimate small and large values of  $V_{\text{rel}}(\mathbf{P})$ , respectively.

518

### 519 **Bias correction**

520 Some authors (Cheverud et al., 1989; Torices & Muñoz-Pajares, 2015) have suggested

521 correcting the sampling bias in eigenvalue dispersion indices by means of subtracting

522 Wagner's (1984) null expectation from empirical values (but see also Armbruster et al.,

523 2009). This method could potentially be used for  $V$  and  $V_{\text{rel}}$  with the correct null expectations

524 derived above, to obtain estimators that is unbiased under the null hypothesis. For  $V_{\text{rel}}(\mathbf{S})$  and

525  $V_{\text{rel}}(\mathbf{R})$ , however, the subtraction truncates the upper end of the range, potentially

526 compromising interpretability. To avoid this, it might be desirable to scale these indices in a

527 way analogous to the adjusted coefficient of determination in regression analysis (e.g.,



528 Cramer, 1987):

$$\begin{aligned}
 529 \quad \bar{V}_{\text{rel}}(\mathbf{S}) &= 1 - \frac{1 - V_{\text{rel}}(\mathbf{S})}{1 - E_{\text{null}}[V_{\text{rel}}(\mathbf{S})]} = \frac{pn+2}{p(n-1)} V_{\text{rel}}(\mathbf{S}) - \frac{p+2}{p(n-1)}, \\
 530 \quad \bar{V}_{\text{rel}}(\mathbf{R}) &= 1 - \frac{1 - V_{\text{rel}}(\mathbf{R})}{1 - E_{\text{null}}[V_{\text{rel}}(\mathbf{R})]} = \frac{n}{n-1} V_{\text{rel}}(\mathbf{R}) - \frac{1}{n-1}, \quad (38)
 \end{aligned}$$

531 where  $E_{\text{null}}(\cdot)$  denotes expectation under the appropriate null hypothesis (eqs. 24 and 27).  
 532 This adjustment inflates the variance by the factor of  $1/[1 - E_{\text{null}}(V_{\text{rel}})]^2$ . Furthermore,  
 533 these adjusted indices are unbiased only under the null hypothesis (and trivially the case of  
 534 complete integration), and uniformly underestimate the corresponding population values  
 535 otherwise (Fig. S2). As the population value gets away from 0, the adjusted index is  
 536 outperformed by the unadjusted one in both precision and bias (Fig. S3). It should also be  
 537 borne in mind that the profiles of expectations are nonlinear and dependent on  $N$  (Fig. 2). As  
 538 the adjusted indices will be increasingly conservative for small  $N$ , it is questionable whether  
 539 they can be used for comparing samples with different  $N$ , as originally intended by Cheverud  
 540 et al. (1989). For these reasons, use of this adjustment would be restricted to estimation of the  
 541 population value near 0 (up to 0.1–0.2, depending on  $p$  and  $N$ ).

542 On the other hand, a global unbiased estimator of  $V(\boldsymbol{\Sigma})$  can be derived from above  
 543 results:

$$\begin{aligned}
 547 \quad \tilde{V}(\mathbf{S}) &= \frac{n_*^2}{n(pn + p - 2)} \left( pV(\mathbf{S}) - \frac{(p-1)(p+2)}{p^2(n-1)(n+2)} [(n+1)(\text{tr } \mathbf{S})^2 - 2 \text{tr}(\mathbf{S}^2)] \right) \\
 548 \quad &= \frac{1}{p^2 n(n-1)(n+2)} [(pn+2)(\text{tr } \mathbf{A})^2 - (p+n+1) \text{tr}(\mathbf{A}^2)].
 \end{aligned} \quad (39)$$

545 The unbiasedness  $E[\tilde{V}(\mathbf{S})] = V(\boldsymbol{\Sigma})$  can be easily confirmed. Its variance can be similarly  
 546 obtained:

$$\begin{aligned}
 556 \quad \text{Var}[\tilde{V}(\mathbf{S})] &= \frac{4}{p^4 n(n-1)(n+2)} \{2(n-1)(n+2) \text{tr}(\mathbf{\Lambda}^2) (\text{tr} \mathbf{\Lambda})^2 \\
 557 &\quad + (p^2 n + 4p + 2n + 2) [\text{tr}(\mathbf{\Lambda}^2)]^2 - 4p(n-1)(n+2) \text{tr}(\mathbf{\Lambda}^3) \text{tr} \mathbf{\Lambda} \\
 558 &\quad + (2p^2 n^2 + 3p^2 n - 6p^2 - 4pn - 4) \text{tr}(\mathbf{\Lambda}^4)\}, \\
 549 &\hspace{20em} (40)
 \end{aligned}$$

550 which reduces to  $4(p-1)(p+2)\sigma^8/p^3 n(n-1)(n+2)$  under the null hypothesis.

551 Comparison with equations 21 and 30 suggests that this variance is smaller than that of  $V(\mathbf{S})$ ,  
 552 especially under the null hypothesis. Therefore,  $\tilde{V}(\mathbf{S})$  seems superior in both precision and  
 553 bias and can be used when estimation of  $V(\mathbf{\Sigma})$  is desired. It can be used to compare multiple  
 554 samples, provided that its sensitivity to overall scaling is not of concern, e.g., comparison  
 555 between closely related taxa.

559

## 560 **Simulation**

### 561 **Methods**

562 Simulations were conducted under various conditions in order to understand sampling  
 563 properties of the eigenvalue dispersion indices. All simulations were done assuming  
 564 multivariate normality, with varying population covariance matrix  $\mathbf{\Sigma}$ , number of variables  $p$   
 565 ( $= 2, 4, 8, 16, 32, 64, 128, 256, \text{ and } 1024$ ), and sample size  $N$  ( $= 4, 8, 16, 32, 64, 128, \text{ and}$   
 566  $256$ ).

567 For every  $p$ , the following population eigenvalue conformations were considered: 1)  
 568 the null condition, 2)  $q$ -large  $\lambda$  conditions, 3) a linearly decreasing  $\lambda$  condition, and 4) a  
 569 quadratically decreasing  $\lambda$  condition (see Fig. 4 for examples). The null condition is where all  
 570 population eigenvalues are equal in magnitude ( $\lambda_1 = \lambda_2 = \dots = \lambda_p = \bar{\lambda}$ ;  $V_{\text{rel}}(\mathbf{\Sigma}) = 0$ ),  
 571 corresponding to the null hypothesis of sphericity (Fig. 4A). The  $q$ -large  $\lambda$  conditions are  
 572 where the first  $q$  ( $= 1, 2, \text{ and } 4, \text{ provided } p > q$ ) population eigenvalues are equally large and

573 the remaining  $p - q$  ones are equally small ( $\lambda_1 = \dots = \lambda_q > \lambda_{q+1} = \dots = \lambda_p$ ), with varying  
574  $V_{\text{rel}}(\mathbf{\Sigma})$  ( $= 0.1, 0.2, 0.4, 0.6, \text{ and } 0.8$ ; Fig. 4B–G). The necessary condition  $\lambda_p \geq 0$  constrains  
575 possible combinations of  $q$  and  $V_{\text{rel}}(\mathbf{\Sigma})$ : the possible choices of  $V_{\text{rel}}(\mathbf{\Sigma})$  are 0.1–0.8, 0.1–0.4,  
576 and 0.1–0.2 for  $q = 1, 2, \text{ and } 4$ , respectively (Appendix A). These conditions are intended to  
577 represent hypothetical situations where only a few components of meaningful signals are  
578 present in the covariance structure. Individual eigenvalues were calculated for each  
579 combination of  $p, q, \text{ and } V_{\text{rel}}(\mathbf{\Sigma})$  as described in Appendix A. The linearly and quadratically  
580 decreasing  $\lambda$  conditions are where the population eigenvalues are linearly and quadratically,  
581 respectively, decreasing in magnitude (Fig. 4H; Appendix A), in which cases the value of  
582  $V_{\text{rel}}(\mathbf{\Sigma})$  is fixed for a given  $p$ . These conditions are intended to represent covariance  
583 structures with gradually decreasing signals. One might claim that some of these situations,  
584 especially  $q$ -large  $\lambda$  conditions, are too simplistic and biologically unrealistic, but these  
585 simple settings enable us to clarify systematic relationships between parameters and sampling  
586 properties. The primary aim here is to explore sampling properties across a wide range of  
587 parameters, rather than confined to a biologically “realistic” region (which would depend on  
588 specific organismal systems). It should also be recalled that sampling error alone can yield  
589 gradually decreasing patterns of sample eigenvalues typically observed in empirical datasets  
590 (see above and below).

591 For sake of simplicity, all population covariance matrices were scaled to ensure  
592  $V(\mathbf{\Sigma}) = V_{\text{rel}}(\mathbf{\Sigma})$ ; that is,  $\text{tr } \mathbf{\Sigma} = p(p - 1)^{-1/2}$ . This scaling also makes the magnitude of  $V(\mathbf{\Sigma})$   
593 comparable across varying  $p$ . In addition, a population covariance matrix  $\mathbf{\Sigma}$  was constructed  
594 from a predefined set of eigenvalues such that its diagonal elements are equal:  $\sigma_{ii} = \bar{\lambda} =$   
595  $(p - 1)^{-1/2}$  for all  $i$ , thereby enforcing  $\mathbf{\Sigma} = (p - 1)^{-1/2} \mathbf{P}$ . This construction allows for  
596 examining both covariance and correlation matrices with the same population  $V_{\text{rel}}$  from a  
597 single simulated dataset, saving computational resources.  $\mathbf{\Sigma}$  was constructed from  $\mathbf{\Lambda}$  by the

598 iterative Givens rotation algorithm of Davies & Higham (2000), which is guaranteed to  
599 converge within  $p - 1$  iterations. This algorithm was implemented as coded by Waller  
600 (2020), but with the following modifications for reproducibility: no random orthogonal  
601 rotation was involved in the initial stage, and rotation axes were chosen in a fixed order. It  
602 should be noted that the rotations involved—choice of eigenvectors—would in general  
603 influence distributions of  $V_{\text{rel}}(\mathbf{R})$ , except for certain special cases including the 1-large  $\lambda$   
604 condition (see Appendix A). It is impractical to exhaustively examine numerous possible  
605 conformations of eigenvectors, so only the single conformation generated by this algorithm  
606 was used for each combination of parameters.

607         The eigenvalues of a sample covariance matrix were obtained from singular value  
608 decomposition of the data matrix, as the singular values squared and then divided by  $n_*$  (see,  
609 e.g., Jolliffe, 2002). When  $p > N - 1$ , 0's were appended to this vector so that  $p$  sample  
610 eigenvalues were present. Data were centered at the sample mean before the decomposition,  
611 therefore  $n = N - 1$ . It was chosen that  $n_* = n$ . The eigenvalues for a sample correlation  
612 matrix were obtained similarly from the sample-mean-centered data matrix scaled with the  
613 sample standard deviation for each variable.

614         To summarize, each set of simulations consists of the following steps: 1) define a  
615 desired set of eigenvalues  $\Lambda$ ; 2) construct the population covariance matrix  $\Sigma$  with the  
616 rotation algorithm explained above; 3) generate  $N$  i.i.d. normal observations from  $N_p(\mathbf{0}, \Sigma)$ ;  
617 4) eigenvalues of sample covariance and correlation matrices were obtained from singular  
618 value decomposition of the sample-mean-centered data; 5)  $V(\mathbf{S})$ ,  $V_{\text{rel}}(\mathbf{S})$ , and  $V_{\text{rel}}(\mathbf{R})$  were  
619 calculated from the eigenvalues; 6) the steps 3–5 were iterated for 5,000 times in total with  
620 the same  $N$  and  $\Sigma$ . The simulations were conducted on the R environment version 3.5.3 (R  
621 Core Team, 2019). The function “genhypergeo” of the package “hypergeo” was used to

622 evaluate the hypergeometric function in the moments of  $V_{\text{rel}}(\mathbf{R})$ . The codes are provided as  
623 Supplementary Material.

624

## 625 **Results**

626 Examined individually, sample eigenvalues were biased estimators of population  
627 eigenvalues, as expected. Examples of eigenvalue distribution of sample covariance and  
628 correlation matrices are shown in Figures 4 and S1, respectively. Typically, the first few  
629 eigenvalues were overestimated, with the rest being underestimated. Note that gradually  
630 decreasing scree-like profiles of sample eigenvalues typical of empirical datasets can arise  
631 even when most population eigenvalues are identical in magnitude. The sampling biases  
632 decreased as  $N$  increases. These overall trends were similarly observed for correlation  
633 matrices, although the upper tail of the largest eigenvalue tended to be truncated for  
634 correlation matrices because of the constraint  $\text{tr } \mathbf{R} = p$ , effectively cancelling the tendency of  
635 overestimation in this eigenvalue (Fig. S1).

636 Sampling distributions of  $V(\mathbf{S})$  are shown in Figures 5 and S4–S6, and their summary  
637 statistics are shown in Tables 1 and S1. Distributions were unimodal but highly skewed with  
638 long upper tails, especially when  $N$  or  $p$  is small. As expected, sampling dispersion decreases  
639 consistently with increasing  $N$ , with skewness decreasing at the same time. Interestingly, the  
640 shape of distribution does not visibly change with increasing  $p$ , at least with moderately large  
641  $N$  ( $\geq 32$ , say). In all conditions,  $V(\mathbf{S})$  tended to overestimate the population value  $V(\mathbf{\Sigma})$ .  
642 Increasing  $V(\mathbf{\Sigma})$  drastically increased sampling dispersion and skewness, whereas increasing  
643  $q$  with a fixed  $V(\mathbf{\Sigma})$  decreased sampling dispersion without affecting the mean as much.  
644 Sampling distributions of  $V(\mathbf{S})$  under linearly and quadratically decreasing  $\lambda$  conditions look  
645 similar to those under  $q$ -large  $\lambda$  conditions with similar  $V(\mathbf{\Sigma})$  values for the respective  $p$ . The  
646 expressions of the expectation and variance of  $V(\mathbf{S})$  almost always coincided with the

647 sampling mean and variance within a reasonable range of random fluctuations (as expected,  
648 since those results are exact).

649 Results for  $V_{\text{rel}}(\mathbf{S})$  are summarized in Figures 6 and S6–S8 and Tables 2 and S2.  
650 Distributions were unimodal within the range (0, 1), except when  $N = 4$  and  $p = 2$  where the  
651 distribution was essentially uniform. As was the case for  $V(\mathbf{S})$ , the sampling dispersion of  
652  $V_{\text{rel}}(\mathbf{S})$  decreased drastically with increasing  $N$ , and to some extent with increasing  $p$ , and the  
653 shape of distribution does not seem to change drastically with increasing  $p$  past certain  $N$ .  
654  $V_{\text{rel}}(\mathbf{S})$  tended to overestimate the population value  $V_{\text{rel}}(\mathbf{\Sigma})$ , except when the latter is rather  
655 large (= 0.8) where slight underestimation was observed. With increasing  $q$  for a fixed  
656  $V_{\text{rel}}(\mathbf{\Sigma})$ , the distributions tended to shrink, but the sampling bias remained virtually  
657 unchanged or slightly increased. In the null conditions, the exact expressions of the  
658 expectation and variance performed perfectly (as expected). The approximate expectation for  
659 arbitrary conditions derived above yielded substantially smaller values than the empirical  
660 means when  $N$  is small; however, the approximation worked satisfactorily with moderate  $N$   
661 ( $\geq 16$ – $32$ ), with the deviations from empirical means mostly falling within 2 standard error  
662 units. In addition, the approximate expectation worked rather well, even with small  $N$ , under  
663 either A) the  $q$ -large  $\lambda$  conditions with  $q = 2$  and  $V_{\text{rel}}(\mathbf{\Sigma}) = 0.4$ , B) same with  $q = 4$ , or C)  
664 linearly and quadratically decreasing  $\lambda$  conditions with moderately large  $p$  ( $\geq 16$ ). Other  
665 conditions held constant, the accuracy of the approximate expectation in absolute scale  
666 tended to slightly improve with increasing  $p$ , effectively balancing with the decreasing  
667 sampling dispersion, so that the relative bias in standard error unit remains almost invariant  
668 across varying  $p$ . The approximate variance for arbitrary conditions derived above yielded  
669 substantially larger values than the empirical variance, except under the  $q$ -large  $\lambda$  conditions  
670 with  $q = 1$  and  $V_{\text{rel}}(\mathbf{\Sigma}) = 0.8$  where it yielded smaller values. Even with the moderately  
671 large  $N$  of 64, the expression yielded values inaccurate by  $\sim 5\%$  in the scale of standard

672 deviation (SD scale hereafter), except under the linearly and quadratically decreasing  $\lambda$   
673 conditions with moderately large  $p$  ( $\geq 16$ ), where it worked largely satisfactorily.

674 Results for  $V_{\text{rel}}(\mathbf{R})$  are summarized in Figures 7, S6, S9, and S10 and Tables 3 and  
675 S3. Distributions were unimodal within the range (0, 1), except when  $p = 2$  and  $N \leq 8$   
676 where an additional peak is usually present near 0. The overall response to varying  $p$  and  $N$  is  
677 largely similar to that of  $V_{\text{rel}}(\mathbf{S})$ , although the shape of distribution was substantially different  
678 for small  $N$ . As expected from the theoretical expectations noted above,  $V_{\text{rel}}(\mathbf{R})$  tends to  
679 overestimate the population value  $V_{\text{rel}}(\mathbf{P})$  when the latter is small but tends to underestimate  
680 it when  $V_{\text{rel}}(\mathbf{P}) = 0.8$ . The expressions of expectation for the null and arbitrary conditions  
681 and variance for the null condition derived above showed almost perfect match with the  
682 empirical means and variances (as expected). The asymptotic variance for arbitrary  
683 conditions with  $p > 2$  derived above behaved somewhat idiosyncratically. It yielded larger  
684 values than the empirical variances under A) the  $q$ -large  $\lambda$  conditions with  $q = 1$  and  
685  $V_{\text{rel}}(\mathbf{P}) = 0.1$ –0.6, B) same with  $q = 2$  and  $V_{\text{rel}}(\mathbf{P}) = 0.1$ –0.2 except when  $p = 4$ , and C)  
686 the quadratically decreasing  $\lambda$  conditions with  $p = 4$ ; whereas it yielded smaller values under  
687 a) the  $q$ -large  $\lambda$  conditions with  $q = 1$  and  $V_{\text{rel}}(\mathbf{P}) = 0.8$ , b) same with  $q = 2$  and  $V_{\text{rel}}(\mathbf{P}) =$   
688 0.4, c) same with  $q = 4$ , d) same with  $q = 2$  and  $p = 4$ , e) the linearly decreasing  $\lambda$   
689 conditions, and f) the quadratically decreasing  $\lambda$  conditions except when  $p = 4$ . This latter  
690 underestimation of sampling dispersion seems to happen when the smallest population  
691 eigenvalue is smaller than  $\sim 0.125$ , although this is not true for the case d. In all cases, the  
692 accuracy of the asymptotic expression tends to improve with increasing  $N$ . Relative error  
693 decreases to 3–10% in SD scale with large  $N$  ( $\geq 64$ ) under the  $q$ -large  $\lambda$  conditions with  $q =$   
694 1 (all cases),  $q = 2$  and  $V_{\text{rel}}(\mathbf{P}) = 0.1$ –0.2, or  $q = 4$  and  $V_{\text{rel}}(\mathbf{P}) = 0.1$ . However, in other  
695 conditions, the relative error can be extremely large (10–300% in SD scale with  $N = 256$ ),  
696 especially when the smallest population eigenvalue is small ( $< 0.1$ ).

697

## 698 **Discussion**

699 Eigenvalue dispersion indices can be calculated for covariance or correlation matrices in  
700 similar ways, but implications are rather different. On the one hand, the relative eigenvalue  
701 variance of a sample covariance matrix  $V_{\text{rel}}(\mathbf{S})$  is a test statistic for the sphericity (John,  
702 1972; Sugiura, 1972; Nagao, 1973), and is thus interpreted as a measure of eccentricity of  
703 variation, be it due to large variation of a single trait or covariation between traits.  
704 Interpretation of the unstandardized eigenvalue variance of a sample covariance matrix  $V(\mathbf{S})$   
705 is less straightforward, but it can potentially be useful in comparing eccentricity between  
706 samples when the sensitivity to overall scaling is not of concern, primarily for the presence of  
707 an unbiased estimator of the corresponding population value with a known variance (eq. 39).  
708 On the other hand, the relative eigenvalue variance of a sample correlation matrix  $V_{\text{rel}}(\mathbf{R})$  is  
709 identical to the average of the squared correlation coefficients across all pairs of traits  
710 (Durand & Le Roux, 2017; see above). The average squared correlation is another commonly  
711 used index of phenotypic integration (e.g., Cheverud et al., 1983), but its equivalence to  
712  $V_{\text{rel}}(\mathbf{R})$  seems to have been overlooked, apart from an empirical confirmation by Haber's  
713 (2011) simulations. Obviously, the choice between covariance and correlation should be  
714 made according to the scope of individual analyses (Klingenberg, 1996; Hansen & Houle,  
715 2008; Pavlicev et al., 2009; Goswami & Polly, 2010; see also Machado et al., 2019 for an  
716 interesting discussion). Usual caveats for the choice between covariance and correlation is  
717 also pertinent here (Jolliffe, 2002): covariance between traits have clear interpretability only  
718 if all traits are in the same unit and dimension. These are despite that  $V_{\text{rel}}(\mathbf{S})$  is dimensionless  
719 and independent of the overall scaling of traits.

720       Perhaps the most remarkable finding of this study is that the distributions of  $V_{\text{rel}}(\mathbf{S})$   
721 and  $V_{\text{rel}}(\mathbf{R})$  do not seem to vary much with the number of variables  $p$  itself. The above



722 expressions for the (approximate) mean and variance can be readily calculated for any  $p$ , and  
723 simulation results indicate that their accuracy are not compromised by large  $p$  (Figs. 5–7 and  
724 S2–S8; Tables 1–3 and S1–S3). This finding highlights potential applicability of these  
725 measures to high-dimensional phenotypic data. Nevertheless, it should be remembered that,  
726 when  $p$  exceeds the degree of freedom  $n$ ,  $p - n$  of the sample eigenvalues are 0 and hence  
727 the corresponding population eigenvalues are not estimable. In addition, the first sample  
728 eigenvector tends to be consistently diverged from the first population eigenvector in high-  
729 dimensional settings (Johnstone & Paul, 2018).

730

### 731 **Applications and limitations**

732 The present analytic results assume simple independent sampling from a multivariate normal  
733 population and the Wishart-ness of the cross-product matrix. For some biological datasets,  
734 certain modifications would be required. A simple example is data consisting of multiple  
735 groups with potentially heterogeneous means, e.g., intraspecific variation calculated from  
736 multiple geographic populations or sexes. If uniform  $\Sigma$  across groups can be assumed, cross-  
737 product matrices from the data centered at the respective group's sample mean can be  
738 summed across groups to obtain a pooled cross-product matrix, which is, by the additivity of  
739 Wishart variables, distributed as  $W_p(\Sigma, N - g)$ , where  $N$  is the total sample size and  $g$  is the  
740 number of groups. That is, all above expressions can be applied by simply using the degree of  
741 freedom  $N - g$ . A similar correction is required when eigenvalue dispersion indices are  
742 applied to partial correlation matrices (Torices & Méndez, 2014; Torices & Muñoz-Pajares,  
743 2015). The distribution of sample partial correlation coefficients in  $p_1$  variables  
744 conditionalized on  $p_2$  other variables based on  $N$  observations is the same as that of ordinary  
745 correlation coefficients based on  $N - p_2$  observations with the same corresponding  
746 parameters (e.g., Anderson, 2003: p. 143), so the appropriate degree of freedom is  $n - p_2$ .

747 These procedures are essentially to examine the covariance/correlation matrix of residuals  
748 after conditionalizing on covariates.

749 Present analytical results may not be applicable to those empirical covariance or  
750 correlation matrices that are not based on a Wishart matrix. Primary examples are the  
751 empirical  $\mathbf{G}$  matrices estimated from variance components in MANOVA designs or as  
752 (restricted) maximum likelihood estimators in mixed models (e.g., Lynch & Walsh, 1998).  
753 Mean-standardization, a method recommended for analyzing  $\mathbf{G}$  matrices (e.g., Houle, 1992;  
754 Hereford et al., 2004; Hansen & Houle, 2008; Haber, 2016), can also violate the  
755 distributional assumption if sample means are used in the standardization. If eigenvalue  
756 dispersion indices are to be used with any of these methods, their sampling properties need to  
757 be critically assessed.

758 The assumption of multivariate normality may be intrinsically inappropriate for some  
759 types of data. Examples include meristic (count) data, compositional or proportional data,  
760 angles, and directional data. Application of eigenvalue dispersion indices (or indeed  
761 covariance/correlation itself) to such data types would require special treatments, which are  
762 beyond the scope of this paper. Needless to say, the appropriateness of multivariate normality  
763 should be critically assessed in every empirical dataset when the present analytic results are  
764 to be applied, even if the data type is conformable with normality. Robustness of the above  
765 results against non-normality may deserve some investigations.

766

### 767 **Shape variables**

768 The application to traditional morphometric datasets, in which all variables are typically  
769 measured in the same unit, is rather straightforward, as covariance/correlation in such  
770 variables has full interpretability in the Euclidean trait space. Quite often, component(s) of  
771 little interest, e.g., size, are removed by transforming raw data, inducing covariation in

772 resultant variables that needs to be taken into account in hypothesis tests. The most typical  
773 transformation is the division by an isometric or allometric size variable (Jolicoeur, 1963;  
774 Mosimann, 1970; Mosimann & James, 1979; Darroch & Mosimann, 1985; Klingenberg,  
775 1996, 2016), which can conveniently be done by orthogonal projection in the space of log-  
776 transformed variables. The projection of objects onto the hyperplane orthogonal to a  
777 subspace, say, the column space of  $\mathbf{H}$  ( $p \times k$  full-column-rank matrix; for the isometric size  
778 vector,  $\mathbf{H} = p^{-1/2}\mathbf{1}_p$ ), can be done by right-multiplying the data by the projection matrix  
779 (e.g., Burnaby, 1966):

$$793 \quad \mathbf{I}_p - \mathbf{H}(\mathbf{H}^T\mathbf{H})^{-1}\mathbf{H}^T.$$

780 Therefore, the covariance matrix in the resultant space can be obtained from that in the  
781 original space  $\mathbf{\Sigma}$  as

$$794 \quad [\mathbf{I}_p - \mathbf{H}(\mathbf{H}^T\mathbf{H})^{-1}\mathbf{H}^T]\mathbf{\Sigma}[\mathbf{I}_p - \mathbf{H}(\mathbf{H}^T\mathbf{H})^{-1}\mathbf{H}^T].$$

782 Under the null condition ( $\mathbf{\Sigma} = \sigma^2\mathbf{I}_p$ ) specifically, this becomes

$$795 \quad \sigma^2[\mathbf{I}_p - \mathbf{H}(\mathbf{H}^T\mathbf{H})^{-1}\mathbf{H}^T],$$

783 because the projection matrix is symmetric and idempotent. This transformation renders  $k$   
784 eigenvalues to be 0 by construction. When the focus is on covariance rather than correlation,  
785 these null eigenvalues can optionally be dropped from calculation of eigenvalue mean and  
786 dispersion, so that the resultant dispersion index quantifies eccentricity of variation in the  
787 subspace of interest. Theories derived above can be applied with minimal modifications,  
788 although the asymptotic variance of  $V_{\text{rel}}(\mathbf{R})$  may not work well due to the singularity. These  
789 discussions assume that independence between the raw variables can at least hypothetically  
790 be conceived, e.g., when measurements are taken from non-overlapping parts of an organism.  
791 If measurements are taken from overlapping parts of an organism, then there will be  
792 dependence between variables due to the geometric configuration, which needs to be taken

796 into consideration on case-by-case basis (Mitteroecker et al., 2012). It may even be  
797 inappropriate to assume multivariate normality for this last type of data.

798         Application to landmark-based geometric morphometric data is more complicated,  
799 primarily because the shape space of Procrustes-aligned landmark configurations is (typically  
800 a restricted region of) the surface of a hyper(hemi)sphere. In practice, however, empirical  
801 analyses are usually conducted on a Euclidean tangent space instead of the shape space itself,  
802 assuming that the former gives a satisfactory metric approximation of the latter (e.g., Rohlf,  
803 1999; Marcus et al., 2000; Klingenberg, 2020). It will in principle be possible to obtain an  
804 approximate population covariance matrix of landmark coordinates in this tangent space from  
805 that of raw landmark coordinates before alignment, by using the orthogonal projection  
806 method mentioned above with such an **H** whose columns represent the non-shape  
807 components. Such a set of vectors can be obtained either as a basis of the complement of the  
808 tangent space (see Rohlf & Bookstein, 2003) or directly from the consensus configuration  
809 (Klingenberg, 2020). The stereographic projection might potentially be preferred over the  
810 orthogonal projection in projecting aligned empirical configurations in the shape space to the  
811 tangent space—not to be confused with the projection from the raw space to the tangent  
812 space—for purposes of analysing eccentricity of variation. This is because the stereographic  
813 projection tends to approximately preserve multivariate normality of the raw coordinates into  
814 the resultant tangent space, provided that the variation in the raw coordinates is sufficiently  
815 small and that the mean configuration is taken as the point of tangency (Rohlf, 1999). It  
816 should be noted that Procrustes superimposition changes perceived patterns of variation in  
817 landmark coordinates, often rather drastically (Rohlf & Slice, 1990; Walker, 2000). Such  
818 phenomena are probably to be seen as properties of shape variables, rather than necessarily  
819 nuisance artefacts (Klingenberg, 2021). Whether these can be of concern or not would  
820 depend on the scope of individual analyses (see also Machado et al., 2019).

821

## 822 **Phylogenetic data**

823 So far data were assumed to be i.i.d. multivariate normal variables. Important applications in  
824 evolutionary biology involve non-i.i.d. observations, most notably phylogenetically  
825 structured data in which  $N$  observations (typically species) have covariance due to shared  
826 evolutionary histories. Trait covariation at the interspecific level may have interpretations  
827 under certain microevolutionary models (Felsenstein, 1988; Hansen & Martins, 1996; Revell  
828 & Harmon, 2008; Uyeda & Harmon, 2014; Caetano & Harmon, 2019). Under the assumption  
829 that trait evolution along phylogeny can be described by (potentially a mixture of) linear  
830 invariant Gaussian models, such as the Brownian motion (BM), accelerating–decelerating  
831 (ACDC; or early burst), and Ornstein–Uhlenbeck (OU) processes, the joint distribution of the  
832 observations is known to be multivariate normal (Hansen & Martins, 1996; Manceau et al.,  
833 2017; Mitov et al., 2020). A brief overview is given below for potential applications of the  
834 present analytic results to phylogenetically structured data.

835 For BM and its modifications, including BM with a trend, Pagel’s  $\lambda$ , and ACDC  
836 models, the covariance matrix of the  $N \times p$  dimensional data  $\mathbf{X}$  can be factorized into the  
837 intertrait and interspecific components in the form of Kronecker product:  $\mathbf{\Sigma} \otimes \mathbf{\Psi}$ , where  $\mathbf{\Psi}$  is  
838 the  $N \times N$  interspecific covariance matrix specified by the underlying phylogeny and  
839 parameter(s) specific to the evolutionary model (see Hansen & Martins, 1996; Freckleton et  
840 al., 2002; Blomberg et al., 2003; Clavel et al., 2015; Mitov et al., 2020). In this case the data  
841 can conveniently be considered as a matrix-variate normal variable (see Gupta & Nagar,  
842 1999):  $\mathbf{X} \sim N_{N,p}(\mathbf{M}, \mathbf{\Sigma} \otimes \mathbf{\Psi})$ , where  $\mathbf{M}$  is a  $N \times p$  matrix of means. If  $\mathbf{\Psi}$  is known a priori—  
843 that is, we have an accurate phylogenetic hypothesis and parameters—the change of  
844 variables  $\mathbf{Y} = \mathbf{\Psi}^{-1/2}\mathbf{X}$  leads to  $\mathbf{Y} \sim N_{N,p}(\mathbf{\Psi}^{-1/2}\mathbf{M}, \mathbf{\Sigma} \otimes \mathbf{I}_N)$ , thereby essentially avoiding the  
845 complication of dependence between observations. This procedure is widely recognized as

846 the (phylogenetic) generalized least squares (GLS; e.g., Grafen, 1989; Martins & Hansen,  
847 1997; Rohlf, 2001; Symonds & Blomberg, 2014). If we know the population mean  $\mathbf{M}$  in  
848 addition, then the cross product matrix centered at it,

$$869 \quad (\mathbf{Y} - \Psi^{-1/2}\mathbf{M})^T (\mathbf{Y} - \Psi^{-1/2}\mathbf{M}) = (\mathbf{X} - \mathbf{M})^T \Psi^{-1} (\mathbf{X} - \mathbf{M}),$$

849 is distributed as  $W_p(\Sigma, N)$ . If we don't exactly know  $\mathbf{M}$  yet still assume  $\mathbf{M} = \mathbf{1}_N \boldsymbol{\mu}^T$  with the  
850 unknown but uniform  $p \times 1$  mean vector  $\boldsymbol{\mu}$ , then the GLS estimate of the mean  $\hat{\boldsymbol{\mu}} =$   
851  $(\mathbf{1}_N^T \Psi^{-1} \mathbf{1}_N)^{-1} \mathbf{1}_N^T \Psi^{-1} \mathbf{X}$  (e.g., Martins & Hansen, 1997) can be used to obtain a sample-  
852 mean-centered cross-product matrix

$$870 \quad (\mathbf{Y} - \Psi^{-1/2} \mathbf{1}_N \hat{\boldsymbol{\mu}}^T)^T (\mathbf{Y} - \Psi^{-1/2} \mathbf{1}_N \hat{\boldsymbol{\mu}}^T) = (\mathbf{X} - \mathbf{1}_N \hat{\boldsymbol{\mu}}^T)^T \Psi^{-1} (\mathbf{X} - \mathbf{1}_N \hat{\boldsymbol{\mu}}^T),$$

853 which can be shown to be distributed as  $W_p(\Sigma, N - 1)$ . If there are multiple blocks of species  
854 with different means (regimes), then cross-product matrices calculated separately for each of  
855 these can be summed to obtain a Wishart matrix with a modified degree of freedom as  
856 mentioned above, although it would naturally be asked first whether those regimes share the  
857 same  $\Sigma$  (Revell & Collar, 2009; Caetano & Harmon, 2019). Above analytic results can  
858 directly be applied to these Wishart matrices. Estimation of  $\Sigma$  based on this transformation  
859 has previously been devised (Revell & Harmon, 2008; see also Huelsenbeck & Rannala,  
860 2003, Revell & Harrison, 2008; Adams & Felice, 2014), and has been shown to have superior  
861 accuracy in estimating eigenvalues and eigenvectors over estimation ignoring phylogenetic  
862 structure under model conditions (Revell, 2009). Variants of this method have already been  
863 applied to analyze eccentricity of interspecific covariation (Haber, 2016; Watanabe, 2018). In  
864 practice, however,  $\Psi$  is virtually never known accurately because phylogeny and parameters  
865 of evolutionary models are generally estimated with error, so empirical cross-product  
866 matrices may not be strictly Wishart. This source of error is inherent to any phylogenetic  
867 comparative analysis. Unlike the GLS estimate of the mean, which remains unbiased even  
868 when  $\Psi$  is misspecified, the GLS estimate of trait (co)variance is in general biased in this

871 case (see Rohlf, 2006). Although there are certain ways to incorporate phylogenetic  
872 uncertainty into statistical inferences (e.g., Huelsenbeck & Rannala, 2003; Garamszegi &  
873 Mundry, 2014; Nakagawa & de Villemereuil, 2019), potential consequences of the  
874 uncertainty over the distributions of derived statistics require further investigation (see also  
875 Revell et al., 2018). Nevertheless, the GLS estimation with slightly inaccurate  $\Psi$  is supposed  
876 to yield a better estimate of trait (co)variance than the estimation ignoring phylogenetic  
877 covariation altogether (Rohlf, 2006). It should be noted that uniform scaling of  $\Psi$  translates  
878 to the reciprocal scaling of the cross-product matrix;  $V(\mathbf{S})$  is sensitive to this scaling, whereas  
879  $V_{\text{rel}}(\mathbf{S})$  and  $V_{\text{rel}}(\mathbf{R})$  are not. Therefore, specifically under the BM model, the only major  
880 concern for the latter two indices would be the phylogenetic uncertainty.

881         Unfortunately, the GLS estimation of trait covariance does not seem feasible for  
882 multivariate OU models, where the joint covariance matrix cannot in general be factorized  
883 into intertrait and interspecific components (Bartoszek et al., 2012; Mitov et al., 2020). This  
884 is notably except when the selection strength matrix is spherical and the tree is ultrametric, in  
885 which case a factorization of the form  $\Sigma \otimes \Psi$  is possible (the scalar OU model; Bastide et al.,  
886 2018) and hence the GLS cross-product matrix can in principle be calculated, assuming that  
887 the relevant parameters are known. Otherwise, the random drift/diffusion matrix of the OU  
888 model estimated in one or other criteria can potentially be analyzed, although little is known  
889 about its sampling properties under various implementations, other than that accurate  
890 estimation is notoriously difficult (e.g., Ho & Ané, 2014; Clavel et al., 2015). Further studies  
891 are required on technical aspects of quantifying trait covariation in phylogenetically  
892 structured data under such complex models, as well as its biological implications (e.g.,  
893 Adams & Collyer, 2018, 2019b; Mitov et al., 2019, 2020; Clavel et al., 2019; Clavel &  
894 Morlon, 2020).

895

## 896 **Concluding remarks**

897 Eigenvalue dispersion indices of covariance or correlation matrices are commonly used as  
898 measures of trait covariation, but their statistical implications have not been well appreciated,  
899 against which criticism has reasonably been directed (e.g., Hansen & Houle, 2008; Hansen et  
900 al., 2019). As discussed above,  $V_{\text{rel}}(\mathbf{S})$  and  $V_{\text{rel}}(\mathbf{R})$  have clear statistical justifications as test  
901 statistics for sphericity and no correlation, respectively. However, sample eigenvalue  
902 dispersion indices are biased estimators of the corresponding population values. This paper  
903 derived (or restated) exact and approximate expressions for the expectation and variance of  
904  $V(\mathbf{S})$ ,  $V_{\text{rel}}(\mathbf{S})$ , and  $V_{\text{rel}}(\mathbf{R})$  under the respective null and arbitrary conditions, with which  
905 empirical values can be compared. All null moments derived are exact, as well as both  
906 moments of  $V(\mathbf{S})$  and the expectation of  $V_{\text{rel}}(\mathbf{R})$  under arbitrary conditions. Moments of  
907  $V_{\text{rel}}(\mathbf{S})$  under arbitrary conditions are approximations based on the delta method; the  
908 approximate expectation was shown to work reasonably well with a moderate sample size  
909 ( $N \geq 16-32$ ), whereas the approximate variance requires a larger sample size (e.g.,  $N \geq 64$ ,  
910 depending on other conditions). The variance of  $V_{\text{rel}}(\mathbf{R})$  under arbitrary conditions is  
911 asymptotic, and was seen to work well with a relatively large sample size ( $N \geq 64$ ) in some  
912 conditions, but not so well in others even with an extremely large sample size. Under such  
913 conditions where these expressions work, they can be used for (approximate) statistical  
914 inferences and tests for arbitrary covariance/correlation structures, as well as for  
915 determination of appropriate sample size in empirical analyses, essentially replacing  
916 qualitative thresholds proposed earlier (e.g., Haber, 2011; Jung et al., 2020).

917       There are several conceivable ways for statistical inferences and hypothesis testing for  
918 eigenvalue dispersion indices. When sample size is so large that distributions of the indices  
919 are virtually symmetric ( $N \geq 16-128$ , depending on other conditions), the moments derived  
920 above may potentially be used to construct approximate confidence intervals. If multivariate



921 normality (or any other explicit distribution) can be assumed, then it is straightforward to  
922 obtain empirical distributions under appropriate null or alternative conditions with Monte  
923 Carlo simulations. Critical points of the null distributions and empirical power at  $\alpha = 0.05$   
924 and 0.01 based on the present simulations are presented in Table S1–S3 as a quick guide for  
925 sampling design. Several limiting and approximate distributions have been proposed for  
926 related statistics (e.g., John, 1972; Nagao, 1973; Ledoit & Wolf, 2002; Schott, 2005), which  
927 could be used for simple null hypothesis testing with large  $N$ . Resampling-based tests are  
928 another potential avenue of development. Applicability and performance of these alternative  
929 methods would deserve further investigations.

930

## 931 **Acknowledgements**

932 The author would like to thank Carmelo Fruciano and Christian P. Klingenberg for  
933 encouragements and constructive comments in an early stage of the study. This work was  
934 partly supported by the Newton International Fellowships by the Royal Society  
935 (NIF\R1\180520) and the Overseas Research Fellowships by the Japan Society for the  
936 Promotion of Science.

937

## 938 **References**

939 **Adams DC. 2016.** Evaluating modularity in morphometric data: challenges with the RV  
940 coefficient and a new test measure. *Methods in Ecology and Evolution* **7**: 565–572.  
941 <https://doi.org/10.1111/2041-210X.12511>.

942 **Adams DC, Collyer ML. 2018.** Multivariate phylogenetic comparative methods:  
943 evaluations, comparisons, and recommendations. *Systematic Biology* **67**: 14–31.  
944 <https://doi.org/10.1093/sysbio/syx055>.

945 **Adams DC, Collyer ML. 2019a.** Comparing the strength of modular signal, and evaluating  
946 alternative modular hypotheses, using covariance ratio effect sizes with morphometric  
947 data. *Evolution* **73**: 2352–2367. <https://doi.org/10.1111/evo.13867>.

- 948 **Adams DC, Collyer ML. 2019b.** Phylogenetic comparative methods and the evolution of  
949 multivariate phenotypes. *Annual Review of Ecology, Evolution, and Systematics* **50**: 405–  
950 425. <https://doi.org/10.1146/annurev-ecolsys-110218-024555>.
- 951 **Adams DC, Felice RN. 2014.** Assessing trait covariation and morphological integration on  
952 phylogenies using evolutionary covariance matrices. *PLoS ONE* **9**: e94335.  
953 <https://doi.org/10.1371/journal.pone.0094335>.
- 954 **Agrawal AF, Stinchcombe JR. 2009.** How much do genetic covariances alter the rate of  
955 adaptation? *Proceedings of the Royal Society B: Biological Sciences* **276**: 1183–1191.  
956 <https://doi.org/10.1098/rspb.2008.1671>.
- 957 **Anderson TW. 1963.** Asymptotic theory for principal component analysis. *Annals of*  
958 *Mathematical Statistics* **34**: 122–148. <https://doi.org/10.1214/aoms/1177704248>.
- 959 **Anderson TW. 2003.** *An Introduction to Multivariate Statistical Analysis*, 3rd edn. Hoboken,  
960 New Jersey: John Wiley & Sons.
- 961 **Arlegi M, Veschambre-Couture C, Gómez-Olivencia A. 2020.** Evolutionary selection and  
962 morphological integration in the vertebral column of modern humans. *American Journal*  
963 *of Physical Anthropology* **171**: 17–36. <https://doi.org/10.1002/ajpa.23950>.
- 964 **Armbruster WS, Hansen TF, Pélabon C, Pérez-Barrales R, Maad J. 2009.** The adaptive  
965 accuracy of flowers: measurement and microevolutionary patterns. *Annals of Botany* **103**:  
966 1529–1545. <https://doi.org/10.1093/aob/mcp095>.
- 967 **Armbruster WS, Pélabon C, Bolstad GH, Hansen TF. 2014.** Integrated phenotypes:  
968 understanding trait covariation in plants and animals. *Philosophical Transactions of the*  
969 *Royal Society B: Biological Sciences* **369**: 20130245.  
970 <https://doi.org/10.1098/rstb.2013.0245>.
- 971 **Bartoszek K, Pienaar J, Mostad P, Andersson S, Hansen TF. 2012.** A phylogenetic  
972 comparative method for studying multivariate adaptation. *Journal of Theoretical Biology*  
973 **314**: 204–215. <https://doi.org/10.1016/j.jtbi.2012.08.005>.
- 974 **Bastide P, Ané C, Robin S, Mariadassou M. 2018.** Inference of adaptive shifts for  
975 multivariate correlated traits. *Systematic Biology* **67**: 662–680.  
976 <https://doi.org/10.1093/sysbio/syy005>.

- 977 **Blomberg SP, Garland T Jr, Ives AR. 2003.** Testing for phylogenetic signal in comparative  
978 data: behavioral traits are more labile. *Evolution* **57**: 717–745.  
979 <https://doi.org/10.1111/j.0014-3820.2003.tb00285.x>.
- 980 **Brommer JE. 2014.** Using average autonomy to test whether behavioral syndromes  
981 constrain evolution. *Behavioral Ecology and Sociobiology* **68**: 691–700.  
982 <https://doi.org/10.1007/s00265-014-1699-6>.
- 983 **Burnaby TP. 1966.** Growth-invariant discriminant functions and generalized distances.  
984 *Biometrics* **22**: 96–110. <https://doi.org/10.2307/2528217>.
- 985 **Caetano DS, Harmon LJ. 2019.** Estimating correlated rates of trait evolution with  
986 uncertainty. *Systematic Biology* **68**: 412–429. <https://doi.org/10.1093/sysbio/syy067>.
- 987 **Cane WP. 1993.** The ontogeny of postcranial integration in the common tern, *Sterna*  
988 *hirundo*. *Evolution* **47**: 1138–1151. <https://doi.org/10.1111/j.1558-5646.1993.tb02141.x>.
- 989 **Chenoweth SF, Rundle HD, Blows MW. 2010.** The contribution of selection and genetic  
990 constraints to phenotypic divergence. *American Naturalist* **175**: 186–196.  
991 <https://doi.org/10.1086/649594>.
- 992 **Cheverud JM. 1982.** Phenotypic, genetic, and environmental morphological integration in  
993 the cranium. *Evolution* **36**: 499–516. <https://doi.org/10.1111/j.1558-5646.1982.tb05070.x>.
- 994 **Cheverud JM. 1988.** A comparison of genetic and phenotypic correlations. *Evolution* **42**:  
995 958–968. <https://doi.org/10.1111/j.1558-5646.1988.tb02514.x>.
- 996 **Cheverud JM. 1996.** Quantitative genetic analysis of cranial morphology in the cotton-top  
997 (*Saguinus oedipus*) and saddle-back (*S. fuscicollis*) tamarins. *Journal of Evolutionary*  
998 *Biology* **9**: 5–42. <https://doi.org/10.1046/j.1420-9101.1996.9010005.x>.
- 999 **Cheverud JM, Rutledge JJ, Atchley WR. 1983.** Quantitative genetics of development:  
1000 genetic correlations among age-specific trait values and the evolution of ontogeny.  
1001 *Evolution* **37**: 895–905. <https://doi.org/10.1111/j.1558-5646.1983.tb05619.x>.
- 1002 **Cheverud JM, Wagner GP, Dow MM. 1989.** Methods for the comparative analysis of  
1003 variation patterns. *Systematic Zoology* **38**: 201–213. <https://doi.org/10.2307/2992282>.
- 1004 **Clavel J, Aristide L, Morlon H. 2019.** A penalized likelihood framework for high-  
1005 dimensional phylogenetic comparative methods and an application to New-World

- 1006 monkeys brain evolution. *Systematic Biology* **68**: 93–116.  
1007 <https://doi.org/10.1093/sysbio/syy045>.
- 1008 **Clavel J, Escarguel G, Merceron G. 2015.** mvMORPH: an R package for fitting multivariate  
1009 evolutionary models to morphometric data. *Methods in Ecology and Evolution* **6**: 1311–  
1010 1319. <https://doi.org/10.1111/2041-210X.12420>.
- 1011 **Clavel J, Morlon H. 2020.** Reliable phylogenetic regressions for multivariate comparative  
1012 data: illustration with the MANOVA and application to the effect of diet and mandible  
1013 morphology in phyllostomid bats. *Systematic Biology* **69**: 927–943.  
1014 <https://doi.org/10.1093/sysbio/syaa010>.
- 1015 **Constantine AG. 1963.** Some non-central distribution problems in multivariate analysis.  
1016 *Annals of Mathematical Statistics* **34**: 1270–1285.  
1017 <https://doi.org/10.1214/aoms/1177703863>.
- 1018 **Cramer JS. 1987.** Mean and variance of  $R^2$  in small and moderate samples. *Journal of*  
1019 *Econometrics* **35**: 253–266. [https://doi.org/10.1016/0304-4076\(87\)90027-3](https://doi.org/10.1016/0304-4076(87)90027-3).
- 1020 **Darroch JN, Mosimann JE. 1985.** Canonical and principal components of shape.  
1021 *Biometrika* **72**: 241–252. <https://doi.org/10.1093/biomet/72.2.241>.
- 1022 **Davies PI, Higham NJ. 2000.** Numerically stable generation of correlation matrices and  
1023 their factors. *BIT Numerical Mathematics* **40**: 640–651.  
1024 <https://doi.org/10.1023/A:1022384216930>.
- 1025 **Dochtermann NA. 2011.** Testing Cheverud’s conjecture for behavioral correlations and  
1026 behavioral syndromes. *Evolution* **65**: 1814–1820. <https://doi.org/10.1111/j.1558-5646.2011.01264.x>.
- 1028 **Durand J-L, Le Roux B. 2017.** Linkage index of variables and its relationship with variance  
1029 of eigenvalues in PCA and MCA. *Statistica Applicata – Italian Journal of Applied*  
1030 *Statistics* **29**: 123–135. <https://doi.org/10.26398/IJAS.0029-006>.
- 1031 **Felice RN, Randau M, Goswami A. 2018.** A fly in a tube: macroevolutionary expectations  
1032 for integrated phenotypes. *Evolution* **72**: 2580–2594. <https://doi.org/10.1111/evo.13608>.
- 1033 **Felsenstein J. 1988.** Phylogenies and quantitative characters. *Annual Review of Ecology and*  
1034 *Systematics* **19**: 445–471. <https://doi.org/10.1146/annurev.es.19.110188.002305>.

- 1035 **Fornoni J, Ordano M, Boege K, Domínguez CA. 2009.** Phenotypic integration: between  
1036 zero and how much is too much. *New Phytologist* **183**: 248–250.  
1037 <https://doi.org/10.1111/j.1469-8137.2009.02911.x>.
- 1038 **Freckleton RP, Harvey PH, Pagel M. 2002.** Phylogenetic analysis of comparative data: a  
1039 test and review of evidence. *American Naturalist* **160**: 712–726.  
1040 <https://doi.org/10.1086/343873>.
- 1041 **Garamszegi LZ, Mundry R. 2014.** Multimodel-inference in comparative analyses. In:  
1042 Garamszegi LZ, ed. *Modern Phylogenetic Comparative Methods and Their Applications*  
1043 *in Evolutionary Biology: Concepts and Practice*. Berlin: Springer, 305–331.  
1044 [https://doi.org/10.1007/978-3-662-43550-2\\_12](https://doi.org/10.1007/978-3-662-43550-2_12).
- 1045 **Ghosh BK. 1966.** Asymptotic expansions for the moments of the distribution of correlation  
1046 coefficient. *Biometrika* **53**: 258–262. <https://doi.org/10.2307/2334076>.
- 1047 **Girshick MA. 1939.** On the sampling theory of roots of determinantal equations. *Annals of*  
1048 *Mathematical Statistics* **10**: 203–224. <https://doi.org/10.1214/aoms/1177732180>.
- 1049 **Gleason TC, Staelin R. 1975.** A proposal for handling missing data. *Psychometrika* **40**: 229-  
1050 252. <https://doi.org/10.1007/BF02291569>.
- 1051 **Goswami A. 2006.** Morphological integration in the carnivoran skull. *Evolution* **60**: 169–  
1052 183. <https://doi.org/10.1111/j.0014-3820.2006.tb01091.x>.
- 1053 **Goswami A, Binder WJ, Mearchen J, O’Keefe FR. 2015.** The fossil record of phenotypic  
1054 integration and modularity: a deep-time perspective on developmental and evolutionary  
1055 dynamics. *Proceedings of the National Academy of Sciences of the United States of*  
1056 *America* **112**: 4891–4896. <https://doi.org/10.1073/pnas.1403667112>.
- 1057 **Goswami A, Finnarelli JA. 2016.** EMMLi: a maximum likelihood approach to the analysis  
1058 of modularity. *Evolution* **70**: 1622–1637. <https://doi.org/10.1111/evo.12956>.
- 1059 **Goswami A, Polly PD. 2010.** Methods for studying morphological integration and  
1060 modularity. In: Alroy J, Hunt G, eds. *Quantitative Methods in Paleobiology*.  
1061 *Paleontological Society Papers* **16**: 213–243.  
1062 <https://doi.org/10.1017/S1089332600001881>.
- 1063 **Grabowski M, Porto A. 2017.** How many more? Sample size determination in studies of  
1064 morphological integration and evolvability. *Methods in Ecology and Evolution* **8**: 592–  
1065 603. <https://doi.org/10.1111/2041-210X.12674>.

- 1066 **Grafen A. 1989.** The phylogenetic regression. *Philosophical Transactions of the Royal*  
1067 *Society of London B: Biological Sciences* **326**: 119–157.  
1068 <https://doi.org/10.1098/rstb.1989.0106>.
- 1069 **Gupta AK, Nagar DK. 1999.** *Matrix Variate Distributions*. Boca Raton, Florida: Chapman  
1070 & Hall/CRC.
- 1071 **Haber A. 2011.** A comparative analysis of integration indices. *Evolutionary Biology* **38**:  
1072 476–488. <https://doi.org/10.1007/s11692-011-9137-4>.
- 1073 **Haber A. 2015.** The evolution of morphological integration in the ruminant skull.  
1074 *Evolutionary Biology* **42**: 99–114. <https://doi.org/10.1007/s11692-014-9302-7>.
- 1075 **Haber A. 2016.** Phenotypic covariation and morphological diversification in the ruminant  
1076 skull. *American Naturalist* **187**: 576–591. <https://doi.org/10.1086/685811>.
- 1077 **Haber A, Dworkin I. 2017.** Disintegrating the fly: a mutational perspective on phenotypic  
1078 integration and covariation. *Evolution* **71**: 66–80. <https://doi.org/10.1111/evo.13100>.
- 1079 **Hallgrímsson B, Jamniczky H, Young NM, Rolian C, Parsons TE, Boughner JC,**  
1080 **Marcucio RS. 2009.** Deciphering the palimpsest: studying the relationships between  
1081 morphological integration and phenotypic covariation. *Evolutionary Biology* **36**: 355–  
1082 376. <https://doi.org/10.1007/s11692-009-9076-5>.
- 1083 **Hansen TF, Houle D. 2008.** Measuring and comparing evolvability and constraint in  
1084 multivariate characters. *Journal of Evolutionary Biology* **21**: 1201–1219.  
1085 <https://doi.org/10.1111/j.1420-9101.2008.01573.x>.
- 1086 **Hansen TF, Martins E. 1996.** Translating between microevolutionary process and  
1087 macroevolutionary patterns: the correlation structure of interspecific data. *Evolution* **50**:  
1088 1404–1417. <https://doi.org/10.1111/j.1558-5646.1996.tb03914.x>.
- 1089 **Hansen TF, Solvin TM, Pavlicev M. 2019.** Predicting evolutionary potential: a numerical  
1090 test of evolvability measures. *Evolution* **73**: 689–703. <https://doi.org/10.1111/evo.13705>.
- 1091 **Harder LD. 2009.** Questions about floral (dis)integration. *New Phytologist* **183**: 247–248.  
1092 <https://doi.org/10.1111/j.1469-8137.2009.02881.x>.
- 1093 **Hereford J, Hansen TF, Houle D. 2004.** Comparing strengths of directional selection: how  
1094 strong is strong? *Evolution* **58**: 2133–2143. [https://doi.org/10.1111/j.0014-](https://doi.org/10.1111/j.0014-3820.2004.tb01592.x)  
1095 [3820.2004.tb01592.x](https://doi.org/10.1111/j.0014-3820.2004.tb01592.x).

- 1096 **Ho LST, Ané C. 2014.** Intrinsic inference difficulties for trait evolution with Ornstein–  
1097 Uhlenbeck models. *Methods in Ecology and Evolution* **5**: 1133–1146.  
1098 <https://doi.org/10.1111/2041-210X.12285>.
- 1099 **Houle D. 1992.** Comparing evolvability and variability of quantitative traits. *Genetics* **130**:  
1100 195–204. <https://doi.org/10.1093/genetics/130.1.195>.
- 1101 **Huelsenbeck JP, Rannala B. 2003.** Detecting correlation between characters in a  
1102 comparative analysis with uncertain phylogeny. *Evolution* **57**: 1237–1247.  
1103 <https://doi.org/10.1111/j.0014-3820.2003.tb00332.x>.
- 1104 **John S. 1971.** Some optimal multivariate tests. *Biometrika* **58**: 123–127.  
1105 <https://doi.org/10.1093/biomet/58.1.123>.
- 1106 **John S. 1972.** The distribution of a statistic used for testing sphericity of normal  
1107 distributions. *Biometrika* **59**: 169–173. <https://doi.org/10.1093/biomet/59.1.169>.
- 1108 **Johnstone IM, Paul D. 2018.** PCA in high dimensions: an orientation. *Proceedings of the*  
1109 *IEEE* **106**: 1277–1292. <https://doi.org/10.1109/JPROC.2018.2846730>.
- 1110 **Jolicoeur P. 1963.** The multivariate generalization of the allometry equation. *Biometrics* **19**:  
1111 497–499. <https://doi.org/10.2307/2527939>.
- 1112 **Jolliffe IT. 2002.** *Principal Component Analysis*, 2nd edn. New York: Springer.
- 1113 **Jung H, Conaway MA, von Cramon-Taubadel N. 2020.** Examination of sample size  
1114 determination in integration studies based on the integration coefficient of variation  
1115 (ICV). *Evolutionary Biology* **47**: 293–307. <https://doi.org/10.1007/s11692-020-09514-w>.
- 1116 **Kirkpatrick M. 2009.** Patterns of quantitative genetic variation in multiple dimensions.  
1117 *Genetica* **136**: 271–284. <https://doi.org/10.1007/s10709-008-9302-6>.
- 1118 **Klingenberg CP. 1996.** Multivariate allometry. In: Marcus LF, ed. *Advances in*  
1119 *Morphometrics*. New York: Plenum Press, 23–49. [https://doi.org/10.1007/978-1-4757-](https://doi.org/10.1007/978-1-4757-9083-2_3)  
1120 [9083-2\\_3](https://doi.org/10.1007/978-1-4757-9083-2_3).
- 1121 **Klingenberg CP. 2014.** Studying morphological integration and modularity at multiple  
1122 levels: concepts and analysis. *Philosophical Transactions of the Royal Society B:*  
1123 *Biological Sciences* **369**: 20130249. <https://doi.org/10.1098/rstb.2013.0249>.

- 1124 **Klingenberg CP. 2016.** Size, shape, and form: concepts of allometry in geometric  
1125 morphometrics. *Development Genes and Evolution* **226**: 113–137.  
1126 <https://doi.org/10.1007/s00427-016-0539-2>.
- 1127 **Klingenberg CP. 2020.** Walking on Kendall’s shape space: understanding shape spaces and  
1128 their coordinate systems. *Evolutionary Biology* **47**: 334–352.  
1129 <https://doi.org/10.1007/s11692-020-09513-x>.
- 1130 **Klingenberg CP. 2021.** How exactly did the nose get that long? A critical rethinking of the  
1131 Pinocchio effect and how shape changes relate to landmarks. *Evolutionary Biology* **48**:  
1132 115–127. <https://doi.org/10.1007/s11692-020-09520-y>.
- 1133 **Klingenberg CP, Duttke S, Whelan S, Kim M. 2012.** Developmental plasticity,  
1134 morphological variation and evolvability: a multilevel analysis of morphometric  
1135 integration in the shape of compound leaves. *Journal of Evolutionary Biology* **25**: 115–  
1136 129. <https://doi.org/10.1111/j.1420-9101.2011.02410.x>.
- 1137 **Konishi S. 1979.** Asymptotic expansions for the distributions of statistics based on the  
1138 sample correlation matrix in principal component analysis. *Hiroshima Mathematical*  
1139 *Journal* **9**: 647–700. <https://doi.org/10.32917/hmj/1206134750>.
- 1140 **Lande R. 1979.** Quantitative genetic analysis of multivariate evolution, applied to brain:body  
1141 size allometry. *Evolution* **33**: 402–416. [https://doi.org/10.1111/j.1558-  
1142 5646.1979.tb04694.x](https://doi.org/10.1111/j.1558-5646.1979.tb04694.x).
- 1143 **Lande R, Arnold SJ. 1983.** The measurement of selection on correlated characters.  
1144 *Evolution* **37**: 1210–1226. <https://doi.org/10.1111/j.1558-5646.1983.tb00236.x>.
- 1145 **Lawley DN. 1956.** Tests of significance for the latent roots of covariance and correlation  
1146 matrices. *Biometrika* **43**: 128–136. <https://doi.org/10.2307/2333586>.
- 1147 **Ledoit O, Wolf M. 2002.** Some hypothesis tests for the covariance matrix when the  
1148 dimension is large compared to the sample size. *Annals of Statistics* **30**: 1081–1102.  
1149 <https://doi.org/10.1214/aos/1031689018>.
- 1150 **Lynch M, Walsh B. 1998.** *Genetics and Analysis of Quantitative Traits*. Sunderland,  
1151 Massachusetts: Sinauer Associates.
- 1152 **Machado FA, Hubbe A, Melo D, Porto A, Marroig G. 2019.** Measuring the magnitude of  
1153 morphological integration: the effect of differences in morphometric representations and  
1154 the inclusion of size. *Evolution* **73**: 2518–2528. <https://doi.org/10.1111/evo.13864>.



- 1155 **Manceau M, Lambert A, Morlon H. 2017.** A unifying comparative phylogenetic  
1156 framework including traits coevolving across interacting lineages. *Systematic Biology* **66**:  
1157 551–568. <https://doi.org/10.1093/sysbio/syw115>.
- 1158 **Marcus LF, Hingst-Zaher E, Zaher H. 2000.** Application of landmark morphometrics to  
1159 skulls representing the orders of living mammals. *Hystrix* **11**: 27–47.  
1160 <https://doi.org/10.4404/hystrix-11.1-4135>.
- 1161 **Marroig G, Melo DAR, Garcia G. 2012.** Modularity, noise, and natural selection. *Evolution*  
1162 **66**: 1506–1524. <https://doi.org/10.1111/j.1558-5646.2011.01555.x>.
- 1163 **Marroig G, Shirai LT, Porto A, de Oliveira FB, De Conto V. 2009.** The evolution of  
1164 modularity in the mammalian skull II: evolutionary consequences. *Evolutionary Biology*  
1165 **36**: 136–148. <https://doi.org/10.1007/s11692-009-9051-1>.
- 1166 **Martins E, Hansen TF. 1997.** Phylogenies and the comparative method: a general approach  
1167 to incorporating phylogenetic information into the analysis of interspecific data.  
1168 *American Naturalist* **149**: 646–667. <https://doi.org/10.1086/286013>.
- 1169 **Mitov V, Bartoszek K, Asimomitis G, Stadler T. 2020.** Fast likelihood calculation for  
1170 multivariate Gaussian phylogenetic models with shifts. *Theoretical Population Biology*  
1171 **131**: 66–78. <https://doi.org/10.1016/j.tpb.2019.11.005>.
- 1172 **Mitov V, Bartoszek K, Stadler T. 2019.** Automatic generation of evolutionary hypotheses  
1173 using mixed Gaussian phylogenetic models. *Proceedings of the National Academy of*  
1174 *Sciences of the United States of America* **116**: 16921–16926.  
1175 <https://doi.org/10.1073/pnas.1813823116>.
- 1176 **Mitteroecker P, Gunz P, Neubauer S, Müller G. 2012.** How to explore morphological  
1177 integration in human evolution and development? *Evolutionary Biology* **39**: 536–553.  
1178 <https://doi.org/10.1007/s11692-012-9178-3>.
- 1179 **Mosimann JE. 1970.** Size allometry: size and shape variables with characterizations of the  
1180 lognormal and generalized gamma distributions. *Journal of the American Statistical*  
1181 *Association* **65**: 930–945. <https://doi.org/10.1080/01621459.1970.10481136>.
- 1182 **Mosimann JE, James FC. 1979.** New statistical methods for allometry with application to  
1183 Florida red-winged blackbirds. *Evolution* **33**: 444–459. [https://doi.org/10.1111/j.1558-](https://doi.org/10.1111/j.1558-5646.1979.tb04697.x)  
1184 [5646.1979.tb04697.x](https://doi.org/10.1111/j.1558-5646.1979.tb04697.x).

- 1185 **Muirhead RJ. 1982.** *Aspects of Multivariate Statistical Theory*. Hoboken, New Jersey: John  
1186 Wiley & Sons.
- 1187 **Nagao H. 1973.** On some test criteria for covariance matrix. *Annals of Statistics* **1**: 700–709.  
1188 <https://doi.org/10.1214/aos/1176342464>.
- 1189 **Nakagawa S, de Villemereuil P. 2019.** A general method for simultaneously accounting for  
1190 phylogenetic and species sampling uncertainty via Rubin’s rules in comparative analysis.  
1191 *Systematic Biology* **68**: 632–641. <https://doi.org/10.1093/sysbio/syy089>.
- 1192 **Olson EC, Miller RL. 1958.** *Morphological Integration*. [Chicago]: University of Chicago  
1193 Press.
- 1194 **Ordano M, Fornoni J, Boege K, Domínguez CA. 2008.** The adaptive value of phenotypic  
1195 floral integration. *New Phytologist* **179**: 1183–1192. [https://doi.org/10.1111/j.1469-](https://doi.org/10.1111/j.1469-8137.2008.02523.x)  
1196 [8137.2008.02523.x](https://doi.org/10.1111/j.1469-8137.2008.02523.x).
- 1197 **Pavlicev M, Cheverud JM, Wagner GP. 2009.** Measuring morphological integration using  
1198 eigenvalue variance. *Evolutionary Biology* **36**: 157–170. [https://doi.org/10.1007/s11692-](https://doi.org/10.1007/s11692-008-9042-7)  
1199 [008-9042-7](https://doi.org/10.1007/s11692-008-9042-7).
- 1200 **Pitchers W, Wolf JB, Tregenza T, Hunt J, Dworkin I. 2014.** Evolutionary rates for  
1201 multivariate traits: the role of selection and genetic variation. *Philosophical Transactions*  
1202 *of the Royal Society B: Biological Sciences* **369**: 20130252.  
1203 <https://doi.org/10.1098/rstb.2013.0252>.
- 1204 **Porto A, de Oliveira FB, Shirai LT, De Conto V, Marroig G. 2009.** The evolution of  
1205 modularity in the mammalian skull I: morphological integration patterns and magnitudes.  
1206 *Evolutionary Biology* **36**: 118–135. <https://doi.org/10.1007/s11692-008-9038-3>.
- 1207 **R Core Team. 2019.** *R: a language and environment for statistical computing, Version 3.5.3*.  
1208 Vienna: R Foundation for Statistical Computing. <https://www.R-project.org/>.
- 1209 **Renaud S, Auffray J-C. 2013.** The direction of main phenotypic variance as a channel to  
1210 morphological evolution: case studies in murine rodents. *Hystrix* **24**: 85–93.  
1211 <https://doi.org/10.4404/hystrix-24.1-6296>.
- 1212 **Revell LJ. 2009.** Size-correction and principal components for interspecific comparative  
1213 studies. *Evolution* **63**: 3258–3268. <https://doi.org/10.1111/j.1558-5646.2009.00804.x>.

- 1214 **Revell LJ, Collar DC. 2009.** Phylogenetic analysis of the evolutionary correlation using  
1215 likelihood. *Evolution* **63**: 1090–1100. <https://doi.org/10.1111/j.1558-5646.2009.00616.x>.
- 1216 **Revell LJ, González-Valenzuela LE, Alfonso A, Castellanos-García LA, Guarnizo CE,**  
1217 **Crawford AJ. 2018.** Comparing evolutionary rates between trees, clades and traits.  
1218 *Methods in Ecology and Evolution* **9**: 994–1005. [https://doi.org/10.1111/2041-](https://doi.org/10.1111/2041-210X.12977)  
1219 [210X.12977](https://doi.org/10.1111/2041-210X.12977).
- 1220 **Revell LJ, Harmon LJ. 2008.** Testing quantitative genetic hypotheses about the  
1221 evolutionary rate matrix for continuous characters. *Evolutionary Ecology Research* **10**:  
1222 311–331.
- 1223 **Revell LJ, Harrison AS. 2008.** PCCA: a program for phylogenetic canonical correlation  
1224 analysis. *Bioinformatics* **24**: 1018–1020. <https://doi.org/10.1093/bioinformatics/btn065>.
- 1225 **Roff DA. 1995.** The estimation of genetic correlations from phenotypic correlations: a test of  
1226 Cheverud’s conjecture. *Heredity* **74**: 481–490. <https://doi.org/10.1038/hdy.1995.68>.
- 1227 **Rohlf FJ. 1999.** Shape statistics: Procrustes superimpositions and tangent spaces. *Journal of*  
1228 *Classification* **16**: 197–223. <https://doi.org/10.1007/s003579900054>.
- 1229 **Rohlf FJ. 2001.** Comparative methods for the analysis of continuous variables: geometric  
1230 interpretations. *Evolution* **55**: 2143–2160. [https://doi.org/10.1111/j.0014-](https://doi.org/10.1111/j.0014-3820.2001.tb00731.x)  
1231 [3820.2001.tb00731.x](https://doi.org/10.1111/j.0014-3820.2001.tb00731.x).
- 1232 **Rohlf FJ. 2006.** A comment on phylogenetic correction. *Evolution* **60**: 1509–1515.  
1233 <https://doi.org/10.1111/j.0014-3820.2006.tb01229.x>.
- 1234 **Rohlf FJ, Bookstein FL. 2003.** Computing the uniform component of shape variation.  
1235 *Systematic Biology* **52**: 66–69. <https://doi.org/10.1080/10635150390132759>.
- 1236 **Rohlf FJ, Slice D. 1990.** Extensions of the Procrustes method for the optimal  
1237 superimposition of landmarks. *Systematic Zoology* **39**: 40–59.  
1238 <https://doi.org/10.2307/2992207>.
- 1239 **Schluter D. 1996.** Adaptive radiation along genetic lines of least resistance. *Evolution* **50**:  
1240 1766–1774. <https://doi.org/10.1111/j.1558-5646.1996.tb03563.x>.
- 1241 **Schott JR. 2005.** Testing for complete independence in high dimensions. *Biometrika* **92**:  
1242 951–956. <https://doi.org/10.1093/biomet/92.4.951>.

- 1243 **Shirai LT, Marroig G. 2010.** Skull modularity in Neotropical marsupials and monkeys: size  
1244 variation and evolutionary constraint and flexibility. *Journal of Experimental Zoology,*  
1245 *Part B: Molecular and Developmental Evolution* **314B**: 663–683.  
1246 <https://doi.org/10.1002/jez.b.21367>.
- 1247 **Sodini SM, Kemper KE, Wray NR, Trzaskowski M. 2018.** Comparison of genotypic and  
1248 phenotypic correlations: Cheverud’s conjecture in humans. *Genetics* **209**: 941–948.  
1249 <https://doi.org/10.1534/genetics.117.300630>.
- 1250 **Srivastava MS, Khatri CG. 1979.** *An Introduction to Multivariate Statistics*. New York:  
1251 North Holland.
- 1252 **Srivastava MS, Yanagihara H. 2010.** Testing the equality of several covariance matrices  
1253 with fewer observations than the dimension. *Journal of Multivariate Analysis* **101**: 1319–  
1254 1329. <https://doi.org/10.1016/j.jmva.2009.12.010>.
- 1255 **Steppan SJ, Phillips PC, Houle D. 2002.** Comparative quantitative genetics: evolution of  
1256 the **G** matrix. *Trends in Ecology and Evolution* **17**: 320–327.  
1257 [https://doi.org/10.1016/S0169-5347\(02\)02505-3](https://doi.org/10.1016/S0169-5347(02)02505-3).
- 1258 **Stuart A, Ord JK. 1994.** *Kendall’s Advanced Theory of Statistics*, 6th edn, Vol. 1. London:  
1259 Hodder Education [Reprinted in 2004 by John Wiley & Sons, Chichester].
- 1260 **Sugiura N. 1972.** Locally best invariant test for sphericity and the limiting distributions.  
1261 *Annals of Mathematical Statistics* **43**: 1312–1316.  
1262 <https://doi.org/10.1214/aoms/1177692481>.
- 1263 **Symonds MRE, Blomberg SP. 2014.** A primer on phylogenetic generalized least squares.  
1264 In: Garamszegi LZ, ed. *Modern Phylogenetic Comparative Methods and Their*  
1265 *Application in Evolutionary Biology: Concepts and Practice*. Berlin: Springer, 105–130.  
1266 [https://doi.org/10.1007/978-3-662-43550-2\\_5](https://doi.org/10.1007/978-3-662-43550-2_5).
- 1267 **Torices R, Méndez M. 2014.** Resource allocation to inflorescence components is highly  
1268 integrated despite differences between allocation currencies and sites. *International*  
1269 *Journal of Plant Sciences* **175**: 713–723. <https://doi.org/10.1086/676622>.
- 1270 **Torices R, Muñoz-Pajares AJ. 2015.** PHENIX: an R package to estimate a size-controlled  
1271 phenotypic integration index. *Applications in Plant Sciences* **3**: 1400104.  
1272 <https://doi.org/10.3732/apps.1400104>.

- 1273 **Uyeda JC, Harmon LJ. 2014.** A novel Bayesian method for inferring and interpreting the  
1274 dynamics of adaptive landscapes from phylogenetic comparative data. *Systematic Biology*  
1275 **63:** 902–918. <https://doi.org/10.1093/sysbio/syu057>.
- 1276 **Van Valen L. 1974.** Multivariate structural statistics in natural history. *Journal of*  
1277 *Theoretical Biology* **45:** 235–247. [https://doi.org/10.1016/0022-5193\(74\)90053-8](https://doi.org/10.1016/0022-5193(74)90053-8).
- 1278 **Van Valen L. 2005.** The statistics of variation. In: Hallgrímsson B, Hall BK, eds. *Variation*.  
1279 Amsterdam: Elsevier, 29–47. <https://doi.org/10.1016/B978-012088777-4/50005-3>.
- 1280 **de Waal DJ, Nel DG. 1973.** On some expectations with respect to Wishart matrices. *South*  
1281 *African Statistical Journal* **7:** 61–67.
- 1282 **Wagner GP. 1984.** On the eigenvalue distribution of genetic and phenotypic dispersion  
1283 matrices: evidence for a nonrandom organization of quantitative character variation.  
1284 *Journal of Mathematical Biology* **21:** 77–95. <https://doi.org/10.1007/BF00275224>.
- 1285 **Walker JA. 2000.** Ability of geometric morphometric methods to estimate a known  
1286 covariance matrix. *Systematic Biology* **49:** 686–696.  
1287 <https://doi.org/10.1080/106351500750049770>.
- 1288 **Waller NG. 2020.** Generating correlation matrices with specified eigenvalues using the  
1289 method of alternating projections. *American Statistician* **74:** 21–28.  
1290 <https://doi.org/10.1080/00031305.2017.1401960>.
- 1291 **Watanabe J. 2018.** Clade-specific evolutionary diversification along ontogenetic major axes  
1292 in avian limb skeleton. *Evolution* **72:** 2632–2652. <https://doi.org/10.1111/evo.13627>.

1293

## 1294 **Appendix A**

1295 In this part, relationships between eigenvalue dispersion indices and individual eigenvalues  
1296 are derived under certain restrictive conditions, in order to facilitate interpretation and to  
1297 clarify algorithms used in simulations. For simplicity, it is assumed  $\bar{\lambda} = 1$  in the following  
1298 discussions; general cases easily follow by scaling.

1299 Let us first consider the simple conditions where the first  $q$  ( $< p$ ) population

1300 eigenvalues are equally large and the rest  $p - q$  eigenvalues are equally small:  $\lambda_1 = \dots =$

1301  $\lambda_q \geq \lambda_{q+1} = \dots = \lambda_p$  (“ $q$ -large  $\lambda$  conditions” in simulations). By noting  $\sum \lambda_i = q\lambda_1 +$

1302  $(p - q)\lambda_p = p$ , it is seen that

1303 
$$V_{\text{rel}}(\mathbf{\Sigma}) = \frac{\sum_{i=1}^p (\lambda_i - 1)^2}{p(p-1)} = \frac{(p-q)}{q(p-1)} (1 - \lambda_p)^2, \quad (\text{A1})$$

1304 and hence

1311 
$$\lambda_1 = 1 + \sqrt{\frac{(p-1)(p-q)}{q}} V_{\text{rel}},$$

1312 
$$\lambda_p = 1 - \sqrt{\frac{q(p-1)}{p-q}} V_{\text{rel}}.$$

1305 (A2)

1306 By noting the constraint  $0 \leq \lambda_p \leq 1$ , an upper limit of  $V_{\text{rel}}$  can be seen from equation A1:

1307 
$$V_{\text{rel}}(\mathbf{\Sigma}) \leq \frac{(p-q)}{q(p-1)} = \frac{1}{q} - \frac{q-1}{q(p-1)}. \quad (\text{A3})$$

1308 It is then obvious that, under these constraints, a value of  $V_{\text{rel}}$  greater than 0.5 cannot happen

1309 when  $q > 1$ ; that is, such a large value implies the dominance of a single component of

1310 variance. The same arguments equally apply to correlation matrices.

1313 When  $q = 1$  for the correlation matrix,  $V_{\text{rel}}(\mathbf{P})$  completely specifies the magnitude of

1314 correlation in every pair of variables. This point can be seen from the definition of

1315 eigendecomposition:

1319 
$$\rho_{ij} = \sum_{k=1}^p \lambda_k v_{ik} v_{jk}$$

1320 
$$= (\lambda_1 - \lambda_p) v_{i1} v_{j1} + \lambda_p \sum_{k=1}^p v_{ik} v_{jk},$$

1316 (A4)

1317 where the  $(i, j)$ -th element of the eigenvector matrix denoted as  $v_{ij}$ . Remember that

1318  $\sum_{k=1}^p v_{ik} v_{jk} = \delta_{ij}$ , the Kronecker delta. Then, by noting equation A2 with  $q = 1$ ,

1321 
$$1 = \rho_{ii} = (\lambda_1 - \lambda_p)u_{i1}^2 + \lambda_p = (pu_{i1}^2 - 1)\sqrt{V_{\text{rel}}} + 1, \quad (\text{A5})$$

1322 therefore  $u_{i1}^2 = p^{-1/2}$  for any  $i$  (that is, the coefficients of the first eigenvector are equal in  
1323 magnitude). Finally, we have

1324 
$$\rho_{ij}^2 = (\lambda_1 - \lambda_p)^2 u_{i1}^2 u_{j1}^2 = V_{\text{rel}} \quad (\text{A6})$$

1325 for any combination of  $i$  and  $j$  ( $i \neq j$ ); the magnitude of correlation is identical across all  
1326 pairs. Taken differently,  $\lambda_2 = \dots = \lambda_p = |\rho|$ . These relationships have previously been noted  
1327 by Anderson (1963) and Pavlicev et al. (2009).

1328 The population eigenvalues of the linearly and quadratically decreasing  $\lambda$  conditions  
1329 used in simulations are defined as  $\lambda_i = (p - i + 1)\lambda_p$  and  $\lambda_i = (p - i + 1)^2\lambda_p$  ( $i =$   
1330  $1, 2, \dots, p$ ) for linearly and quadratically decreasing conditions, respectively. Under the  
1331 assumption of a constant average eigenvalue, it is a simple matter of algebra to obtain the  
1332 actual values of  $\lambda_p$  and  $V_{\text{rel}}(\mathbf{\Sigma})$ , which are simple functions of  $p$ . The latter equals  
1333  $1/3(p + 1)$  and  $(8p + 11)/5(p + 1)(2p + 1)$  for the linearly and quadratically decreasing  $\lambda$   
1334 conditions, respectively.

1335

## 1336 **Appendix B**

1337 In this part, the first two moments of  $V(\mathbf{S})$  and  $V_{\text{rel}}(\mathbf{S})$  under the arbitrary  $\mathbf{\Sigma}$  are derived,  
1338 assuming multivariate normality. Derivation of the moments of the latter requires evaluation  
1339 of moments of the ratio  $\sum l_i^2 / (\sum l_i)^2 = \text{tr}(\mathbf{A}^2) / (\text{tr} \mathbf{A})^2$ , which are not guaranteed to coincide  
1340 with the ratio of moments except under the null hypothesis. Here we utilize the  
1341 approximation based on the Taylor series expansion given in equation 32. In turn, we need  
1342  $E[\text{tr}(\mathbf{A}^2)]$ ,  $E[(\text{tr} \mathbf{A})^2]$ ,  $\text{Var}[\text{tr}(\mathbf{A}^2)]$ ,  $\text{Var}[(\text{tr} \mathbf{A})^2]$ , and  $\text{Cov}[\text{tr}(\mathbf{A}^2), (\text{tr} \mathbf{A})^2]$ .

1343 We will follow Srivastava & Yanagihara's (2010) approach to obtain these moments.

1344 As in the text, let the  $n \times p$  matrix  $\mathbf{Z}$  be  $(\mathbf{z}_1, \mathbf{z}_2, \dots, \mathbf{z}_n)^T$ , where  $\mathbf{z}_i \sim N_p(\mathbf{0}_p, \mathbf{\Sigma})$  for  $i =$

1345  $1, 2, \dots, n$ . Consider the cross-product matrix

$$1346 \quad \mathbf{A} = \mathbf{Z}^T \mathbf{Z}, \quad (\text{B1})$$

1347 such that  $\mathbf{A} \sim W_p(\boldsymbol{\Sigma}, n)$ . Let the spectral decomposition of  $\boldsymbol{\Sigma}$ :

$$1348 \quad \boldsymbol{\Sigma} = \mathbf{Y} \boldsymbol{\Lambda} \mathbf{Y}^T, \quad (\text{B2})$$

1349 with the orthogonal matrix of eigenvectors  $\mathbf{Y}$  and the diagonal matrix of eigenvalues  $\boldsymbol{\Lambda}$ . Let

1350 the  $n \times p$  matrix  $\mathbf{J}$  be  $(\mathbf{j}_1, \mathbf{j}_2, \dots, \mathbf{j}_n)^T$ , where  $\mathbf{j}_i$  are i.i.d.  $N_p(\mathbf{0}, \mathbf{I}_p)$ , such that  $\mathbf{Z} = \mathbf{J} \boldsymbol{\Sigma}^{1/2}$  with

1351  $\boldsymbol{\Sigma}^{1/2} = \mathbf{Y} \boldsymbol{\Lambda}^{1/2} \mathbf{Y}^T$ . Then, it is possible to write

$$1352 \quad \mathbf{A} = \boldsymbol{\Sigma}^{1/2} \mathbf{J}^T \mathbf{J} \boldsymbol{\Sigma}^{1/2} = \mathbf{Y} \boldsymbol{\Lambda}^{1/2} \mathbf{Y}^T \mathbf{J}^T \mathbf{J} \mathbf{Y} \boldsymbol{\Lambda}^{1/2} \mathbf{Y}^T = \mathbf{Y} \boldsymbol{\Lambda}^{1/2} \mathbf{V}^T \mathbf{V} \boldsymbol{\Lambda}^{1/2} \mathbf{Y}^T, \quad (\text{B3})$$

1353 where  $\mathbf{V} = \mathbf{J} \mathbf{Y} = (\mathbf{v}_1, \mathbf{v}_2, \dots, \mathbf{v}_p)$  with  $\mathbf{v}_i$  being i.i.d.  $N_n(\mathbf{0}, \mathbf{I}_n)$ . Furthermore, let  $w_{ij} = \mathbf{v}_i^T \mathbf{v}_j$ ,

1354 such that  $w_{ii}$  are i.i.d. chi-square variables with  $n$  degrees of freedom  $\chi_n^2$ . Obviously  $w_{ij} =$

1355  $w_{ji}$ . Note that

$$1356 \quad \text{tr } \mathbf{A} = \text{tr}(\mathbf{Y} \boldsymbol{\Lambda}^{1/2} \mathbf{V}^T \mathbf{V} \boldsymbol{\Lambda}^{1/2} \mathbf{Y}^T) = \text{tr}(\boldsymbol{\Lambda} \mathbf{V}^T \mathbf{V}) = \sum_{i=1}^n \lambda_i w_{ii}. \quad (\text{B4})$$

1357 From well-known results on normal and chi-square moments, we have the following:

$$1358 \quad E(w_{ii}^r) = n(n+2) \dots (n+2r-2), \quad r = 1, 2, \dots,$$

$$1359 \quad E(w_{ii}^r w_{ij}^2) = E[\text{tr}(w_{ii}^r \mathbf{v}_i \mathbf{v}_i^T \mathbf{v}_j \mathbf{v}_j^T)]$$

$$1360 \quad = \text{tr}[E(w_{ii}^r \mathbf{v}_i \mathbf{v}_i^T) E(\mathbf{v}_j \mathbf{v}_j^T)]$$

$$1361 \quad = \text{tr}[E(w_{ii}^r \mathbf{v}_i \mathbf{v}_i^T) \mathbf{I}_n]$$

$$1362 \quad = E(w_{ii}^{r+1})$$

$$1363 \quad = n(n+2) \dots (n+2r), \quad i \neq j, \quad r = 0, 1, \dots,$$

$$1364 \quad E(w_{ii} w_{jj} w_{ij}^2) = E[\text{tr}(w_{ii} \mathbf{v}_i \mathbf{v}_i^T w_{jj} \mathbf{v}_j \mathbf{v}_j^T)]$$

$$1365 \quad = \sum_{\alpha, \beta, \gamma, \delta}^n E(v_{i\alpha}^2 v_{i\gamma} v_{i\delta}) E(v_{j\beta}^2 v_{j\delta} v_{j\gamma})$$

$$1366 \quad = 9n + 6n(n-1) + n(n-1)^2$$

$$1367 \quad = n(n+2)^2, \quad i \neq j,$$



$$1370 \quad E(w_{ij}^2 w_{ik}^2) = \sum_{\alpha, \beta}^n E(v_{i\alpha}^2 v_{i\beta}^2) E(v_{j\alpha}^2) E(v_{k\beta}^2)$$

$$1371 \quad = 3n + n(n - 1)$$

$$1372 \quad = n(n + 2), \quad i \neq j \neq k,$$

$$1373 \quad E(w_{ij}^4) = \sum_{\alpha, \beta, \gamma, \delta}^n E(v_{i\alpha} v_{i\beta} v_{i\gamma} v_{i\delta}) E(v_{j\alpha} v_{j\beta} v_{j\delta} v_{j\gamma})$$

$$1374 \quad = 9n + 3n(n - 1)$$

$$1375 \quad = 3n(n + 2), \quad i \neq j,$$

$$1368 \quad \tag{B5}$$

1369 where some intervening equations result from direct enumeration of the nonzero moments.

1376 From the above expectations, one can evaluate the desired moments as follows:

$$1377 \quad E[\text{tr}(\mathbf{A}^2)] = E[\text{tr}(\mathbf{A}\mathbf{V}^T \mathbf{V}\mathbf{A}\mathbf{V}^T \mathbf{V})]$$

$$1378 \quad = E\left(\sum_{i,j}^n \lambda_i \lambda_j w_{ij}^2\right)$$

$$1379 \quad = \sum_i^n \lambda_i^2 E(w_{ii}^2) + \sum_{i \neq j}^n \lambda_i \lambda_j E(w_{ij}^2)$$

$$1380 \quad = n(n + 2) \sum_i^n \lambda_i^2 + n \sum_{i \neq j}^n \lambda_i \lambda_j,$$

$$1381 \quad E[(\text{tr} \mathbf{A})^2] = E[[\text{tr}(\mathbf{A}\mathbf{V}^T \mathbf{V})]^2]$$

$$1382 \quad = E\left(\sum_{i,j}^n \lambda_i \lambda_j w_{ii} w_{jj}\right)$$

$$1383 \quad = \sum_i^n \lambda_i^2 E(w_{ii}^2) + \sum_{i \neq j}^n \lambda_i \lambda_j E(w_{ii}) E(w_{jj})$$

$$1384 \quad = n(n + 2) \sum_i^n \lambda_i^2 + n^2 \sum_{i \neq j}^n \lambda_i \lambda_j,$$

$$\begin{aligned}
 1385 \quad & \mathbb{E}[\text{tr}(\mathbf{A}^2)]^2 = \mathbb{E}[\text{tr}(\mathbf{\Lambda V}^T \mathbf{V} \mathbf{\Lambda V}^T \mathbf{V})^2] \\
 1386 \quad & = \mathbb{E} \left( \sum_{i,j,k,l}^n \lambda_i \lambda_j \lambda_k \lambda_l w_{ij}^2 w_{kl}^2 \right) \\
 1387 \quad & = \sum_i^n \lambda_i^4 \mathbb{E}(w_{ii}^4) + 4 \sum_{i \neq j}^n \lambda_i^3 \lambda_j \mathbb{E}(w_{ii}^2 w_{ij}^2) \\
 1388 \quad & + \sum_{i \neq j}^n \lambda_i^2 \lambda_j^2 [\mathbb{E}(w_{ii}^2) \mathbb{E}(w_{jj}^2) + 2 \mathbb{E}(w_{ij}^4)] \\
 1389 \quad & + \sum_{i \neq j \neq k}^n \lambda_i^2 \lambda_j \lambda_k [2 \mathbb{E}(w_{ii}^2) \mathbb{E}(w_{jk}^2) + 4 \mathbb{E}(w_{ij}^2 w_{ik}^2)] \\
 1390 \quad & + \sum_{i \neq j \neq k \neq l}^n \lambda_i \lambda_j \lambda_k \lambda_l \mathbb{E}(w_{ij}^2) \mathbb{E}(w_{kl}^2) \\
 1391 \quad & = n(n+2)(n+4)(n+6) \sum_i^n \lambda_i^4 + 4n(n+2)(n+4) \sum_{i \neq j}^n \lambda_i^3 \lambda_j \\
 1392 \quad & + n(n+2)(n^2+2n+6) \sum_{i \neq j}^n \lambda_i^2 \lambda_j^2 + 2n(n+2) \sum_{i \neq j \neq k}^n \lambda_i^2 \lambda_j \lambda_k \\
 1393 \quad & + n^2 \sum_{i \neq j \neq k \neq l}^n \lambda_i \lambda_j \lambda_k \lambda_l, \\
 1394 \quad & \mathbb{E}[(\text{tr} \mathbf{A})^4] = \mathbb{E}[\text{tr}(\mathbf{\Lambda V}^T \mathbf{V})^4] \\
 1395 \quad & = \mathbb{E} \left( \sum_{i,j,k,l}^n \lambda_i \lambda_j \lambda_k \lambda_l w_{ii} w_{jj} w_{kk} w_{ll} \right)
 \end{aligned}$$

$$1396 \quad = \sum_i^n \lambda_i^4 E(w_{ii}^4) + 4 \sum_{i \neq j}^n \lambda_i^3 \lambda_j E(w_{ii}^3) E(w_{jj}) + 3 \sum_{i \neq j}^n \lambda_i^2 \lambda_j^2 E(w_{ii}^2) E(w_{jj}^2)$$

$$1397 \quad + 6 \sum_{i \neq j \neq k}^n \lambda_i^2 \lambda_j \lambda_k E(w_{ii}^2) E(w_{jj}) E(w_{kk})$$

$$1398 \quad + \sum_{i \neq j \neq k \neq l}^n \lambda_i \lambda_j \lambda_k \lambda_l E(w_{ii}) E(w_{jj}) E(w_{kk}) E(w_{ll})$$

$$1399 \quad = n(n+2)(n+4)(n+6) \sum_i^n \lambda_i^4 + 4n^2(n+2)(n+4) \sum_{i \neq j}^n \lambda_i^3 \lambda_j$$

$$1400 \quad + 3n^2(n+2)^2 \sum_{i \neq j}^n \lambda_i^2 \lambda_j^2 + 6n^3(n+2) \sum_{i \neq j \neq k}^n \lambda_i^2 \lambda_j \lambda_k$$

$$1401 \quad + n^4 \sum_{i \neq j \neq k \neq l}^n \lambda_i \lambda_j \lambda_k \lambda_l,$$

$$1402 \quad E[\text{tr}(\mathbf{A}^2) \cdot (\text{tr} \mathbf{A})^2] = E[\text{tr}(\mathbf{\Lambda} \mathbf{V}^T \mathbf{V} \mathbf{\Lambda} \mathbf{V}^T \mathbf{V}) \cdot [\text{tr}(\mathbf{\Lambda} \mathbf{V}^T \mathbf{V})]^2]$$

$$1403 \quad = E \left( \sum_{i,j,k,l}^n \lambda_i \lambda_j \lambda_k \lambda_l w_{ij}^2 w_{kk} w_{ll} \right)$$

$$1404 \quad = \sum_i^n \lambda_i^4 E(w_{ii}^4) + \sum_{i \neq j}^n \lambda_i^3 \lambda_j [2 E(w_{ii}^3) E(w_{jj}) + 2 E(w_{ii}^2 w_{ij}^2)]$$

$$1405 \quad + \sum_{i \neq j}^n \lambda_i^2 \lambda_j^2 [E(w_{ii}^2) E(w_{jj}^2) + 2 E(w_{ii} w_{jj} w_{ij}^2)]$$

$$1406 \quad + \sum_{i \neq j \neq k}^n \lambda_i^2 \lambda_j \lambda_k [E(w_{ii}^2) E(w_{jj}) E(w_{kk}) + 4 E(w_{ii} w_{ij}^2) E(w_{kk})$$

$$1407 \quad + E(w_{ii}^2) E(w_{jk}^2)] + \sum_{i \neq j \neq k \neq l}^n \lambda_i \lambda_j \lambda_k \lambda_l E(w_{ij}^2) E(w_{kk}) E(w_{ll})$$

$$\begin{aligned}
 1411 \quad &= n(n+2)(n+4)(n+6) \sum_i^n \lambda_i^4 + 2n(n+1)(n+2)(n+4) \sum_{i \neq j}^n \lambda_i^3 \lambda_j \\
 1412 \quad &+ n(n+2)^3 \sum_{i \neq j}^n \lambda_i^2 \lambda_j^2 + n^2(n+2)(n+5) \sum_{i \neq j \neq k}^n \lambda_i^2 \lambda_j \lambda_k \\
 1413 \quad &+ n^3 \sum_{i \neq j \neq k \neq l}^n \lambda_i \lambda_j \lambda_k \lambda_l,
 \end{aligned}$$

1408 (B6)

1409 where notations of the form  $i \neq j \neq k \neq l$  represent inequality of every pairwise combination  
 1410 of the subscripts concerned.

1414 Although equations B6 can be evaluated for any  $\Sigma$ , calculating the product of all  
 1415 possible combinations of eigenvalues is rather cumbersome especially when  $p$  is large. For  
 1416 this practical reason, it would be preferable to simplify these expressions by noting

$$\begin{aligned}
 1418 \quad &\sum_i^n \lambda_i^r = \text{tr}(\mathbf{\Lambda}^r), \quad r = 1, 2, \dots, \\
 1419 \quad &\sum_{i \neq j}^n \lambda_i \lambda_j = \left( \sum_{i=1}^n \lambda_i \right)^2 - \sum_{i=1}^n \lambda_i^2 = (\text{tr} \mathbf{\Lambda})^2 - \text{tr}(\mathbf{\Lambda}^2), \\
 1420 \quad &\sum_{i \neq j}^n \lambda_i^3 \lambda_j = \text{tr} \mathbf{\Lambda} \text{tr}(\mathbf{\Lambda}^3) - \text{tr}(\mathbf{\Lambda}^4), \\
 1421 \quad &\sum_{i \neq j}^n \lambda_i^2 \lambda_j^2 = 3[\text{tr}(\mathbf{\Lambda}^2)]^2 - \text{tr}(\mathbf{\Lambda}^4), \\
 1422 \quad &\sum_{i \neq j \neq k}^n \lambda_i^2 \lambda_j \lambda_k = (\text{tr} \mathbf{\Lambda})^2 \text{tr}(\mathbf{\Lambda}^2) - 2 \text{tr} \mathbf{\Lambda} \text{tr}(\mathbf{\Lambda}^3) - [\text{tr}(\mathbf{\Lambda}^2)]^2 + 2 \text{tr}(\mathbf{\Lambda}^4), \\
 1423 \quad &\sum_{i \neq j \neq k \neq l}^n \lambda_i \lambda_j \lambda_k \lambda_l = (\text{tr} \mathbf{\Lambda})^4 - 6(\text{tr} \mathbf{\Lambda})^2 \text{tr}(\mathbf{\Lambda}^2) + 8 \text{tr} \mathbf{\Lambda} \text{tr}(\mathbf{\Lambda}^3) + 3[\text{tr}(\mathbf{\Lambda}^2)]^2 - 6 \text{tr}(\mathbf{\Lambda}^4).
 \end{aligned}$$

1417 (B7)

1424 Then, equations B6 can be written as follows:

1429 
$$E[\text{tr}(\mathbf{A}^2)] = n(\text{tr } \mathbf{\Lambda})^2 + n(n + 1) \text{tr}(\mathbf{\Lambda}^2),$$

1430 
$$E[(\text{tr } \mathbf{A})^2] = n^2(\text{tr } \mathbf{\Lambda})^2 + 2n \text{tr}(\mathbf{\Lambda}^2),$$

1431 
$$E[[\text{tr}(\mathbf{A}^2)]^2] = n^2(\text{tr } \mathbf{\Lambda})^4 + 2n(n^2 + n + 4)(\text{tr } \mathbf{\Lambda})^2 \text{tr}(\mathbf{\Lambda}^2) + 16n(n + 1) \text{tr } \mathbf{\Lambda} \text{tr}(\mathbf{\Lambda}^3)$$

1432 
$$+ n(n^3 + 2n^2 + 5n + 4)[\text{tr}(\mathbf{\Lambda}^2)]^2 + 4n(2n^2 + 5n + 5) \text{tr}(\mathbf{\Lambda}^4),$$

1433 
$$E[(\text{tr } \mathbf{A})^4] = n^4(\text{tr } \mathbf{\Lambda})^4 + 12n^3(\text{tr } \mathbf{\Lambda})^2 \text{tr}(\mathbf{\Lambda}^2) + 12n^2 \text{tr } \mathbf{\Lambda} \text{tr}(\mathbf{\Lambda}^3)$$

1434 
$$+ 32n^2[\text{tr}(\mathbf{\Lambda}^2)]^2 + 48n \text{tr}(\mathbf{\Lambda}^4).$$

1435 
$$E[\text{tr}(\mathbf{A}^2) \cdot (\text{tr } \mathbf{A})^2] = n^3(\text{tr } \mathbf{\Lambda})^4 + n^2(n^2 + n + 10)(\text{tr } \mathbf{\Lambda})^2 \text{tr}(\mathbf{\Lambda}^2)$$

1436 
$$+ 8n(n^2 + n + 2) \text{tr } \mathbf{\Lambda} \text{tr}(\mathbf{\Lambda}^3) + 2n(n^2 + n + 4)[\text{tr}(\mathbf{\Lambda}^2)]^2$$

1437 
$$+ 24n(n + 1) \text{tr}(\mathbf{\Lambda}^4),$$

1425 (B8)

1426 Finally,

1438 
$$\text{Var}[\text{tr}(\mathbf{A}^2)] = E[[\text{tr}(\mathbf{A}^2)]^2] - E[\text{tr}(\mathbf{A}^2)]^2$$

1439 
$$= 8n(\text{tr } \mathbf{\Lambda})^2 \text{tr}(\mathbf{\Lambda}^2) + 16n(n + 1) \text{tr } \mathbf{\Lambda} \text{tr}(\mathbf{\Lambda}^3)$$

1440 
$$+ 4n(n + 1)[\text{tr}(\mathbf{\Lambda}^2)]^2 + 4n(2n^2 + 5n + 5) \text{tr}(\mathbf{\Lambda}^4),$$

1441 
$$\text{Var}[(\text{tr } \mathbf{A})^2] = E[(\text{tr } \mathbf{A})^4] - E[(\text{tr } \mathbf{A})^2]^2$$

1442 
$$= 8n^3(\text{tr } \mathbf{\Lambda})^2 \text{tr}(\mathbf{\Lambda}^2) + 32n^2 \text{tr } \mathbf{\Lambda} \text{tr}(\mathbf{\Lambda}^3) + 8n^2[\text{tr}(\mathbf{\Lambda}^2)]^2$$

1443 
$$+ 48n \text{tr}(\mathbf{\Lambda}^4),$$

1444 
$$\text{Cov}[\text{tr}(\mathbf{A}^2), (\text{tr } \mathbf{A})^2] = E[\text{tr}(\mathbf{A}^2) \cdot (\text{tr } \mathbf{A})^2] - E[\text{tr}(\mathbf{A}^2)] E[(\text{tr } \mathbf{A})^2]$$

1445 
$$= 8n^2(\text{tr } \mathbf{\Lambda})^2 \text{tr}(\mathbf{\Lambda}^2) + 8n(n^2 + n + 2) \text{tr } \mathbf{\Lambda} \text{tr}(\mathbf{\Lambda}^3) + 8n[\text{tr}(\mathbf{\Lambda}^2)]^2$$

1446 
$$+ 24n(n + 1) \text{tr}(\mathbf{\Lambda}^4).$$

1427 (B9)

1428 Inserting equations B8 and B9 into equations 12, 19, and 32 yields the desired results.

1447 Identical results can be derived from del Waal & Nel's (1973) results on the

1448 expectations of elementary symmetric functions of eigenvalues and their products for a

1449 Wishart matrix. However, these results appear to have been proved only under the condition  
 1450  $n > p - 1$  (see also Constantine, 1963; Muirhead, 1982: chapter 7). The above derivation is  
 1451 valid for any combination of  $p$  and  $n$ .

1452

## 1453 **Appendix C**

1454 This part demonstrates that  $\text{Cov}(r_{ij}^2, r_{kl}^2) = 0$  for  $(i, j) \neq (k, l)$  under the condition  $\mathbf{P} = \mathbf{I}_p$ , as  
 1455 cursorily mentioned by Schott (2005). Under this condition, a sample covariance can be  
 1456 written as  $s_{ij} = n_*^{-1}(\sigma_{ii}\sigma_{jj})^{1/2} \mathbf{v}_i^T \mathbf{v}_j$ , with  $\mathbf{v}_i$  and  $\mathbf{v}_j$  being i.i.d.  $N_n(\mathbf{0}, \mathbf{I}_n)$ . Therefore, a sample  
 1457 correlation coefficient can be written as  $r_{ij} = s_{ij}(s_{ii}s_{jj})^{-1/2} = \mathbf{u}_i^T \mathbf{u}_j$ , where  $\mathbf{u}_i =$   
 1458  $(\mathbf{v}_i^T \mathbf{v}_i)^{-1/2} \mathbf{v}_i$  are uniformly distributed on the surface of the unit hypersphere in the  $n$ -  
 1459 dimensional space. By noting  $\mathbf{u}_i^T \mathbf{u}_i = 1$ , it is possible to see  $E(\mathbf{u}_i \mathbf{u}_i^T) = n^{-1} \mathbf{I}_n$  for any  $i$ ,  
 1460 because the elements of  $\mathbf{u}_i$  are symmetric and uncorrelated with one another (a formal  
 1461 demonstration requires introduction of the density function; see Anderson, 2003: p. 49). With  
 1462 these preliminaries, it is easily seen, for  $i \neq j \neq k$ ,

$$\begin{aligned}
 1468 \quad E(r_{ij}^2 r_{ik}^2) &= E(\mathbf{u}_i^T \mathbf{u}_j \mathbf{u}_j^T \mathbf{u}_i \mathbf{u}_i^T \mathbf{u}_k \mathbf{u}_k^T \mathbf{u}_i) \\
 1469 \quad &= E[\mathbf{u}_i^T E(\mathbf{u}_j \mathbf{u}_j^T) \mathbf{u}_i \mathbf{u}_i^T E(\mathbf{u}_k \mathbf{u}_k^T) \mathbf{u}_i] \\
 1470 \quad &= n^{-2} E[\mathbf{u}_i^T \mathbf{u}_i \mathbf{u}_i^T \mathbf{u}_i] \\
 1471 \quad &= n^{-2} = E(r_{ij}^2) E(r_{ik}^2).
 \end{aligned}$$

1463 (C1)

1464 The second equation is valid because  $\mathbf{u}_i$ ,  $\mathbf{u}_j$ , and  $\mathbf{u}_k$  are stochastically independent from one  
 1465 another. Therefore,  $\text{Cov}(r_{ij}^2, r_{ik}^2) = 0$  for partly overlapping subscripts. Similarly,  
 1466  $\text{Cov}(r_{ij}^2, r_{kl}^2) = 0$  for non-overlapping subscripts, although this could also be seen as a direct  
 1467 consequence of the independence between  $r_{ij}$  and  $r_{kl}$  in this case.

1472

## 1473 Appendix D

1474 In this part, an asymptotic expression for the variance of  $V_{\text{rel}}(\mathbf{R})$  is derived, somewhat  
 1475 heuristically, for arbitrary non-null conditions with  $p > 2$ . Konishi (1979) gave an  
 1476 asymptotic theory for the distribution of an arbitrary function of eigenvalues of a sample  
 1477 correlation matrix  $f(l_1, \dots, l_p)$  under multivariate normality. In particular, when  $n \rightarrow \infty$ ,  
 1478  $\sqrt{n}[f(l_1, \dots, l_p) - f(\lambda_1, \dots, \lambda_p)]$  was shown to be normally distributed with mean 0 and  
 1479 variance

$$1492 \quad \tau^2 = 2 \sum_{\alpha, \beta=1}^p \lambda_\alpha \lambda_\beta \left[ \delta_{\alpha\beta} - (\lambda_\alpha + \lambda_\beta) \sum_{i=1}^p v_{i\alpha}^2 v_{i\beta}^2 + \sum_{i,j=1}^p \rho_{ij}^2 v_{i\alpha}^2 v_{j\beta}^2 \right] f_\alpha f_\beta, \quad (D1)$$

1480 where the summations are over all combinations of subscripts,  $\delta_{\alpha\beta}$  is the Kronecker delta,  $v_{i\alpha}$   
 1481 is the  $(i, \alpha)$ -th element of the population eigenvector matrix  $\mathbf{Y}$ , and  $f_\alpha =$   
 1482  $\partial f / \partial l_\alpha |_{(l_1, \dots, l_p) = (\lambda_1, \dots, \lambda_p)}$ , the partial derivative of  $f$  with respect to  $l_\alpha$  evaluated at  
 1483  $(l_1, \dots, l_p) = (\lambda_1, \dots, \lambda_p)$ . Note that Konishi's (1979; corollary 2.2) original notation also  
 1484 concerned potential multiplicity of population eigenvalues, which is ignored here for  
 1485 simplicity; the population eigenvectors corresponding to multiplied eigenvalues can in  
 1486 practice be chosen arbitrarily as a suite of orthogonal vectors in the appropriate subspace, as  
 1487 is done in numerical determination of eigenvectors. The derivative of  $V_{\text{rel}}(\mathbf{R})$  is simply

$$1493 \quad f_\alpha = \frac{\partial}{\partial l_\alpha} V_{\text{rel}}(\mathbf{R}) \Big|_{(l_1, \dots, l_p) = (\lambda_1, \dots, \lambda_p)} = \frac{2}{p(p-1)} \lambda_\alpha. \quad (D2)$$

1490 Inserting equation D2 into equation D1, we obtain  $\tau^2/n$  as an asymptotic expression of the  
 1491 variance of  $V_{\text{rel}}(\mathbf{R})$  (eq. 37).

1494           An empirically equivalent result can be obtained from the alternative expression of  
1495  $V_{\text{rel}}(\mathbf{R})$  as average squared correlation coefficients (eq. 11), from a similar theory for  
1496 functions of a sample correlation matrix by Konishi (1979: theorem 6.2). However, that  
1497 alternative expression does not seem to bear much practical advantage, for it typically takes  
1498 substantially more computational time to evaluate as  $p$  grows.  
1499



1500 **Table 1.** Summary statistics of selected simulation results for eigenvalue variance of  
 1501 covariance matrix  $V(\mathbf{S})$ . Theoretical expectation ( $E[V(\mathbf{S})]$ ) and standard deviation  
 1502 ( $SD[V(\mathbf{S})]$ ), as well as empirical median, mean, standard deviation (ESD), and bias of mean  
 1503 in standard error unit ( $T = \sqrt{5000}\{\text{Mean} - E[V_{\text{rel}}(\mathbf{S})]\}/\text{ESD}$ , which should roughly follow  $t$   
 1504 distribution with 4999 degrees of freedom if the expectation is exact) from 5000 simulation  
 1505 runs are shown for selected conditions. See Table S1 for full results.

|                                      | $E[V(\mathbf{S})]$ | $SD[V(\mathbf{S})]$ | Median | Mean   | ESD    | $T$     |
|--------------------------------------|--------------------|---------------------|--------|--------|--------|---------|
| $p = 2, V(\boldsymbol{\Sigma}) = 0$  |                    |                     |        |        |        |         |
| $N = 8$                              | 0.2857             | 0.3582              | 0.1731 | 0.2876 | 0.3464 | 0.3845  |
| $N = 16$                             | 0.1333             | 0.1501              | 0.0876 | 0.1330 | 0.1466 | -0.1703 |
| $N = 32$                             | 0.0645             | 0.0686              | 0.0438 | 0.0646 | 0.0689 | 0.0489  |
| $N = 64$                             | 0.0317             | 0.0327              | 0.0221 | 0.0315 | 0.0315 | -0.6336 |
| $p = 4, V(\boldsymbol{\Sigma}) = 0$  |                    |                     |        |        |        |         |
| $N = 8$                              | 0.2143             | 0.1551              | 0.1734 | 0.2131 | 0.1534 | -0.5437 |
| $N = 16$                             | 0.1000             | 0.0602              | 0.0861 | 0.0996 | 0.0603 | -0.4826 |
| $N = 32$                             | 0.0484             | 0.0261              | 0.0429 | 0.0481 | 0.0261 | -0.8676 |
| $N = 64$                             | 0.0238             | 0.0120              | 0.0216 | 0.0239 | 0.0119 | 0.5321  |
| $p = 16, V(\boldsymbol{\Sigma}) = 0$ |                    |                     |        |        |        |         |
| $N = 8$                              | 0.1518             | 0.0304              | 0.1482 | 0.1510 | 0.0307 | -1.8948 |
| $N = 16$                             | 0.0708             | 0.0102              | 0.0702 | 0.0708 | 0.0102 | -0.0003 |
| $N = 32$                             | 0.0343             | 0.0038              | 0.0341 | 0.0342 | 0.0037 | -0.4806 |
| $N = 64$                             | 0.0169             | 0.0015              | 0.0168 | 0.0169 | 0.0015 | -0.6023 |
| $p = 64, V(\boldsymbol{\Sigma}) = 0$ |                    |                     |        |        |        |         |
| $N = 8$                              | 0.1473             | 0.0203              | 0.1464 | 0.1477 | 0.0204 | 1.2947  |

Table 1 (continued)

|                                  | $E[V(\mathbf{S})]$ | $SD[V(\mathbf{S})]$ | Median | Mean   | ESD    | $T$     |
|----------------------------------|--------------------|---------------------|--------|--------|--------|---------|
| $N = 16$                         | 0.0688             | 0.0067              | 0.0688 | 0.0689 | 0.0066 | 1.7306  |
| $N = 32$                         | 0.0333             | 0.0024              | 0.0332 | 0.0333 | 0.0024 | 0.6721  |
| $N = 64$                         | 0.0164             | 0.0009              | 0.0163 | 0.0164 | 0.0009 | -0.4407 |
| <hr/>                            |                    |                     |        |        |        |         |
| $p = 256, V(\Sigma) = 0$         |                    |                     |        |        |        |         |
| $N = 8$                          | 0.1440             | 0.0097              | 0.1436 | 0.1440 | 0.0099 | 0.1215  |
| $N = 16$                         | 0.0672             | 0.0031              | 0.0672 | 0.0672 | 0.0031 | 0.9739  |
| $N = 32$                         | 0.0325             | 0.0011              | 0.0325 | 0.0325 | 0.0011 | -0.8132 |
| $N = 64$                         | 0.0160             | 0.0004              | 0.0160 | 0.0160 | 0.0004 | 0.0842  |
| <hr/>                            |                    |                     |        |        |        |         |
| $p = 1024, V(\Sigma) = 0$        |                    |                     |        |        |        |         |
| $N = 8$                          | 0.1431             | 0.0048              | 0.1430 | 0.1431 | 0.0048 | -0.6874 |
| $N = 16$                         | 0.0668             | 0.0015              | 0.0668 | 0.0668 | 0.0015 | 1.7324  |
| $N = 32$                         | 0.0323             | 0.0005              | 0.0323 | 0.0323 | 0.0005 | 0.3227  |
| $N = 64$                         | 0.0159             | 0.0002              | 0.0159 | 0.0159 | 0.0002 | 0.3522  |
| <hr/>                            |                    |                     |        |        |        |         |
| $p = 2, q = 1, V(\Sigma) = 0.4$  |                    |                     |        |        |        |         |
| $N = 8$                          | 0.6857             | 0.8717              | 0.3967 | 0.6901 | 0.8663 | 0.3572  |
| $N = 16$                         | 0.5333             | 0.4852              | 0.3972 | 0.5426 | 0.4981 | 1.3183  |
| $N = 32$                         | 0.4645             | 0.3023              | 0.3936 | 0.4616 | 0.3011 | -0.6854 |
| $N = 64$                         | 0.4317             | 0.2002              | 0.4044 | 0.4337 | 0.2019 | 0.6886  |
| <hr/>                            |                    |                     |        |        |        |         |
| $p = 4, q = 1, V(\Sigma) = 0.4$  |                    |                     |        |        |        |         |
| $N = 8$                          | 0.6429             | 0.7343              | 0.3949 | 0.6372 | 0.7364 | -0.5426 |
| $N = 16$                         | 0.5133             | 0.4137              | 0.3968 | 0.5132 | 0.4183 | -0.0225 |
| $N = 32$                         | 0.4548             | 0.2598              | 0.3937 | 0.4544 | 0.2661 | -0.1087 |
| $N = 64$                         | 0.4270             | 0.1728              | 0.4025 | 0.4292 | 0.1756 | 0.8791  |
| <hr/>                            |                    |                     |        |        |        |         |
| $p = 16, q = 1, V(\Sigma) = 0.4$ |                    |                     |        |        |        |         |

Table 1 (continued)

|                                    | $E[V(\mathbf{S})]$ | $SD[V(\mathbf{S})]$ | Median | Mean   | ESD    | $T$     |
|------------------------------------|--------------------|---------------------|--------|--------|--------|---------|
| $N = 8$                            | 0.6107             | 0.6427              | 0.4130 | 0.6165 | 0.6509 | 0.6282  |
| $N = 16$                           | 0.4983             | 0.3668              | 0.4060 | 0.5036 | 0.3748 | 0.9922  |
| $N = 32$                           | 0.4476             | 0.2322              | 0.4057 | 0.4492 | 0.2314 | 0.5001  |
| $N = 64$                           | 0.4234             | 0.1552              | 0.4005 | 0.4227 | 0.1546 | -0.3205 |
| <hr/>                              |                    |                     |        |        |        |         |
| $p = 64, q = 1, V(\Sigma) = 0.4$   |                    |                     |        |        |        |         |
| $N = 8$                            | 0.6027             | 0.6206              | 0.4227 | 0.6052 | 0.5988 | 0.2997  |
| $N = 16$                           | 0.4946             | 0.3554              | 0.4061 | 0.5021 | 0.3631 | 1.4613  |
| $N = 32$                           | 0.4458             | 0.2255              | 0.4003 | 0.4445 | 0.2244 | -0.4124 |
| $N = 64$                           | 0.4225             | 0.1509              | 0.3986 | 0.4237 | 0.1546 | 0.5322  |
| <hr/>                              |                    |                     |        |        |        |         |
| $p = 256, q = 1, V(\Sigma) = 0.4$  |                    |                     |        |        |        |         |
| $N = 8$                            | 0.6007             | 0.6151              | 0.4140 | 0.6076 | 0.6137 | 0.7995  |
| $N = 16$                           | 0.4936             | 0.3526              | 0.4000 | 0.4873 | 0.3492 | -1.2751 |
| $N = 32$                           | 0.4453             | 0.2239              | 0.4068 | 0.4465 | 0.2213 | 0.3813  |
| $N = 64$                           | 0.4223             | 0.1499              | 0.4003 | 0.4234 | 0.1505 | 0.5054  |
| <hr/>                              |                    |                     |        |        |        |         |
| $p = 1024, q = 1, V(\Sigma) = 0.4$ |                    |                     |        |        |        |         |
| $N = 8$                            | 0.6002             | 0.6138              | 0.3961 | 0.5940 | 0.6361 | -0.6814 |
| $N = 16$                           | 0.4934             | 0.3519              | 0.4015 | 0.4977 | 0.3638 | 0.8432  |
| $N = 32$                           | 0.4452             | 0.2235              | 0.4037 | 0.4489 | 0.2304 | 1.1498  |
| $N = 64$                           | 0.4222             | 0.1496              | 0.4020 | 0.4240 | 0.1526 | 0.8140  |
| <hr/>                              |                    |                     |        |        |        |         |
| $p = 2, q = 1, V(\Sigma) = 0.8$    |                    |                     |        |        |        |         |
| $N = 8$                            | 1.0857             | 1.2651              | 0.6587 | 1.0792 | 1.3030 | -0.3520 |
| $N = 16$                           | 0.9333             | 0.7343              | 0.7440 | 0.9364 | 0.7250 | 0.3003  |
| $N = 32$                           | 0.8645             | 0.4698              | 0.7732 | 0.8675 | 0.4675 | 0.4571  |
| $N = 64$                           | 0.8317             | 0.3157              | 0.7840 | 0.8333 | 0.3172 | 0.3574  |

Table 1 (continued)

|                                             | $E[V(\mathbf{S})]$ | $SD[V(\mathbf{S})]$ | Median | Mean   | ESD    | $T$     |
|---------------------------------------------|--------------------|---------------------|--------|--------|--------|---------|
| $p = 4, q = 1, V(\mathbf{\Sigma}) = 0.8$    |                    |                     |        |        |        |         |
| $N = 8$                                     | 1.0714             | 1.2182              | 0.6903 | 1.0730 | 1.2081 | 0.0917  |
| $N = 16$                                    | 0.9267             | 0.7096              | 0.7454 | 0.9328 | 0.7139 | 0.6117  |
| $N = 32$                                    | 0.8613             | 0.4549              | 0.7682 | 0.8585 | 0.4565 | -0.4368 |
| $N = 64$                                    | 0.8302             | 0.3061              | 0.7903 | 0.8350 | 0.3069 | 1.1137  |
| $p = 16, q = 1, V(\mathbf{\Sigma}) = 0.8$   |                    |                     |        |        |        |         |
| $N = 8$                                     | 1.0607             | 1.1840              | 0.6778 | 1.0687 | 1.1804 | 0.4765  |
| $N = 16$                                    | 0.9217             | 0.6917              | 0.7517 | 0.9147 | 0.6842 | -0.7221 |
| $N = 32$                                    | 0.8589             | 0.4442              | 0.7847 | 0.8683 | 0.4387 | 1.5248  |
| $N = 64$                                    | 0.8290             | 0.2992              | 0.7925 | 0.8358 | 0.3067 | 1.5855  |
| $p = 64, q = 1, V(\mathbf{\Sigma}) = 0.8$   |                    |                     |        |        |        |         |
| $N = 8$                                     | 1.0580             | 1.1756              | 0.6979 | 1.0755 | 1.2081 | 1.0231  |
| $N = 16$                                    | 0.9204             | 0.6873              | 0.7463 | 0.9304 | 0.7024 | 1.0083  |
| $N = 32$                                    | 0.8583             | 0.4415              | 0.7643 | 0.8495 | 0.4352 | -1.4315 |
| $N = 64$                                    | 0.8287             | 0.2975              | 0.7873 | 0.8292 | 0.2977 | 0.1296  |
| $p = 256, q = 1, V(\mathbf{\Sigma}) = 0.8$  |                    |                     |        |        |        |         |
| $N = 8$                                     | 1.0574             | 1.1735              | 0.6982 | 1.0818 | 1.1935 | 1.4492  |
| $N = 16$                                    | 0.9201             | 0.6862              | 0.7373 | 0.9122 | 0.6746 | -0.8321 |
| $N = 32$                                    | 0.8581             | 0.4409              | 0.7749 | 0.8663 | 0.4540 | 1.2689  |
| $N = 64$                                    | 0.8286             | 0.2971              | 0.7824 | 0.8219 | 0.2873 | -1.6582 |
| $p = 1024, q = 1, V(\mathbf{\Sigma}) = 0.8$ |                    |                     |        |        |        |         |
| $N = 8$                                     | 1.0572             | 1.1729              | 0.6881 | 1.0573 | 1.1723 | 0.0072  |
| $N = 16$                                    | 0.9200             | 0.6859              | 0.7655 | 0.9344 | 0.6943 | 1.4624  |
| $N = 32$                                    | 0.8581             | 0.4407              | 0.7709 | 0.8531 | 0.4414 | -0.7945 |

Table 1 (continued)

|          | $E[V(S)]$ | $SD[V(S)]$ | Median | Mean   | ESD    | $T$    |
|----------|-----------|------------|--------|--------|--------|--------|
| $N = 64$ | 0.8286    | 0.2969     | 0.7840 | 0.8292 | 0.2987 | 0.1364 |

1506

1507 **Table 2.** Summary statistics of selected simulation results for relative eigenvalue variance of  
 1508 covariance matrix  $V_{\text{rel}}(\mathbf{S})$ . (Approximate) theoretical expectation ( $E[V_{\text{rel}}(\mathbf{S})]$ ) and standard  
 1509 deviation ( $SD[V_{\text{rel}}(\mathbf{S})]$ ), as well as empirical median, mean, standard deviation (ESD), and  
 1510 bias of mean in standard error unit ( $T$ ) from 5000 simulation runs are shown for selected  
 1511 conditions. See Table 1 for further information and Table S2 for full results.

|                                               | $\approx E[V_{\text{rel}}(\mathbf{S})]$ | $\approx SD[V_{\text{rel}}(\mathbf{S})]$ | Median | Mean   | ESD    | $T$     |
|-----------------------------------------------|-----------------------------------------|------------------------------------------|--------|--------|--------|---------|
| $p = 2, V_{\text{rel}}(\mathbf{\Sigma}) = 0$  |                                         |                                          |        |        |        |         |
| $N = 8$                                       | 0.2500                                  | 0.1936                                   | 0.2079 | 0.2514 | 0.1924 | 0.4961  |
| $N = 16$                                      | 0.1250                                  | 0.1102                                   | 0.0953 | 0.1259 | 0.1098 | 0.6000  |
| $N = 32$                                      | 0.0625                                  | 0.0587                                   | 0.0448 | 0.0628 | 0.0597 | 0.3234  |
| $N = 64$                                      | 0.0313                                  | 0.0303                                   | 0.0224 | 0.0309 | 0.0289 | -0.8301 |
| $p = 4, V_{\text{rel}}(\mathbf{\Sigma}) = 0$  |                                         |                                          |        |        |        |         |
| $N = 8$                                       | 0.2000                                  | 0.0840                                   | 0.1856 | 0.2002 | 0.0858 | 0.1644  |
| $N = 16$                                      | 0.0968                                  | 0.0433                                   | 0.0907 | 0.0968 | 0.0434 | 0.0620  |
| $N = 32$                                      | 0.0476                                  | 0.0219                                   | 0.0438 | 0.0474 | 0.0221 | -0.6146 |
| $N = 64$                                      | 0.0236                                  | 0.0110                                   | 0.0218 | 0.0237 | 0.0110 | 0.6544  |
| $p = 16, V_{\text{rel}}(\mathbf{\Sigma}) = 0$ |                                         |                                          |        |        |        |         |
| $N = 8$                                       | 0.1579                                  | 0.0193                                   | 0.1562 | 0.1580 | 0.0197 | 0.3764  |
| $N = 16$                                      | 0.0744                                  | 0.0091                                   | 0.0738 | 0.0746 | 0.0094 | 1.4158  |
| $N = 32$                                      | 0.0361                                  | 0.0044                                   | 0.0357 | 0.0361 | 0.0044 | -1.2604 |
| $N = 64$                                      | 0.0178                                  | 0.0022                                   | 0.0177 | 0.0178 | 0.0022 | 0.4338  |
| $p = 64, V_{\text{rel}}(\mathbf{\Sigma}) = 0$ |                                         |                                          |        |        |        |         |
| $N = 8$                                       | 0.1467                                  | 0.0047                                   | 0.1462 | 0.1466 | 0.0046 | -0.6909 |
| $N = 16$                                      | 0.0686                                  | 0.0022                                   | 0.0685 | 0.0686 | 0.0022 | 0.5618  |

Table 2 (continued)

|                                                        | $\approx E[V_{\text{rel}}(\mathbf{S})]$ | $\approx \text{SD}[V_{\text{rel}}(\mathbf{S})]$ | Median | Mean   | ESD    | $T$     |
|--------------------------------------------------------|-----------------------------------------|-------------------------------------------------|--------|--------|--------|---------|
| $N = 32$                                               | 0.0332                                  | 0.0010                                          | 0.0332 | 0.0332 | 0.0011 | 0.0446  |
| $N = 64$                                               | 0.0164                                  | 0.0005                                          | 0.0163 | 0.0164 | 0.0005 | -0.5869 |
| <hr/>                                                  |                                         |                                                 |        |        |        |         |
| $p = 256, V_{\text{rel}}(\mathbf{\Sigma}) = 0$         |                                         |                                                 |        |        |        |         |
| $N = 8$                                                | 0.1438                                  | 0.0012                                          | 0.1437 | 0.1438 | 0.0012 | -0.0173 |
| $N = 16$                                               | 0.0672                                  | 0.0005                                          | 0.0671 | 0.0672 | 0.0005 | 1.4545  |
| $N = 32$                                               | 0.0325                                  | 0.0003                                          | 0.0325 | 0.0325 | 0.0003 | -0.7481 |
| $N = 64$                                               | 0.0160                                  | 0.0001                                          | 0.0160 | 0.0160 | 0.0001 | 0.3608  |
| <hr/>                                                  |                                         |                                                 |        |        |        |         |
| $p = 1024, V_{\text{rel}}(\mathbf{\Sigma}) = 0$        |                                         |                                                 |        |        |        |         |
| $N = 8$                                                | 0.1431                                  | 0.0003                                          | 0.1431 | 0.1431 | 0.0003 | -0.5105 |
| $N = 16$                                               | 0.0668                                  | 0.0001                                          | 0.0668 | 0.0668 | 0.0001 | 0.0231  |
| $N = 32$                                               | 0.0323                                  | 0.0001                                          | 0.0323 | 0.0323 | 0.0001 | -1.3055 |
| $N = 64$                                               | 0.0159                                  | 0.0000                                          | 0.0159 | 0.0159 | 0.0000 | -0.0022 |
| <hr/>                                                  |                                         |                                                 |        |        |        |         |
| $p = 2, q = 1, V_{\text{rel}}(\mathbf{\Sigma}) = 0.4$  |                                         |                                                 |        |        |        |         |
| $N = 8$                                                | 0.4377                                  | 0.2825                                          | 0.4939 | 0.4804 | 0.2334 | 12.9356 |
| $N = 16$                                               | 0.4232                                  | 0.1982                                          | 0.4457 | 0.4384 | 0.1764 | 6.0670  |
| $N = 32$                                               | 0.4132                                  | 0.1378                                          | 0.4169 | 0.4152 | 0.1297 | 1.1224  |
| $N = 64$                                               | 0.4070                                  | 0.0963                                          | 0.4108 | 0.4083 | 0.0945 | 0.9214  |
| <hr/>                                                  |                                         |                                                 |        |        |        |         |
| $p = 4, q = 1, V_{\text{rel}}(\mathbf{\Sigma}) = 0.4$  |                                         |                                                 |        |        |        |         |
| $N = 8$                                                | 0.4319                                  | 0.2065                                          | 0.4730 | 0.4675 | 0.1658 | 15.1734 |
| $N = 16$                                               | 0.4200                                  | 0.1444                                          | 0.4316 | 0.4288 | 0.1272 | 4.8902  |
| $N = 32$                                               | 0.4113                                  | 0.1001                                          | 0.4147 | 0.4125 | 0.0944 | 0.9058  |
| $N = 64$                                               | 0.4060                                  | 0.0699                                          | 0.4073 | 0.4067 | 0.0682 | 0.7503  |
| <hr/>                                                  |                                         |                                                 |        |        |        |         |
| $p = 16, q = 1, V_{\text{rel}}(\mathbf{\Sigma}) = 0.4$ |                                         |                                                 |        |        |        |         |
| $N = 8$                                                | 0.4275                                  | 0.1691                                          | 0.4657 | 0.4626 | 0.1346 | 18.4219 |

Table 2 (continued)

|                                                          | $\approx E[V_{\text{rel}}(\mathbf{S})]$ | $\approx \text{SD}[V_{\text{rel}}(\mathbf{S})]$ | Median | Mean   | ESD    | $T$     |
|----------------------------------------------------------|-----------------------------------------|-------------------------------------------------|--------|--------|--------|---------|
| $N = 16$                                                 | 0.4174                                  | 0.1175                                          | 0.4302 | 0.4270 | 0.1049 | 6.4710  |
| $N = 32$                                                 | 0.4098                                  | 0.0813                                          | 0.4161 | 0.4129 | 0.0762 | 2.8682  |
| $N = 64$                                                 | 0.4052                                  | 0.0566                                          | 0.4070 | 0.4058 | 0.0548 | 0.7118  |
| <hr/>                                                    |                                         |                                                 |        |        |        |         |
| $p = 64, q = 1, V_{\text{rel}}(\mathbf{\Sigma}) = 0.4$   |                                         |                                                 |        |        |        |         |
| $N = 8$                                                  | 0.4264                                  | 0.1613                                          | 0.4670 | 0.4599 | 0.1273 | 18.6017 |
| $N = 16$                                                 | 0.4168                                  | 0.1119                                          | 0.4286 | 0.4266 | 0.0996 | 6.9651  |
| $N = 32$                                                 | 0.4095                                  | 0.0773                                          | 0.4125 | 0.4109 | 0.0726 | 1.3497  |
| $N = 64$                                                 | 0.4050                                  | 0.0538                                          | 0.4063 | 0.4056 | 0.0532 | 0.7287  |
| <hr/>                                                    |                                         |                                                 |        |        |        |         |
| $p = 256, q = 1, V_{\text{rel}}(\mathbf{\Sigma}) = 0.4$  |                                         |                                                 |        |        |        |         |
| $N = 8$                                                  | 0.4261                                  | 0.1594                                          | 0.4637 | 0.4606 | 0.1249 | 19.5222 |
| $N = 16$                                                 | 0.4166                                  | 0.1105                                          | 0.4262 | 0.4228 | 0.0977 | 4.4222  |
| $N = 32$                                                 | 0.4094                                  | 0.0763                                          | 0.4148 | 0.4120 | 0.0718 | 2.5791  |
| $N = 64$                                                 | 0.4050                                  | 0.0531                                          | 0.4066 | 0.4058 | 0.0520 | 1.1405  |
| <hr/>                                                    |                                         |                                                 |        |        |        |         |
| $p = 1024, q = 1, V_{\text{rel}}(\mathbf{\Sigma}) = 0.4$ |                                         |                                                 |        |        |        |         |
| $N = 8$                                                  | 0.4261                                  | 0.1590                                          | 0.4566 | 0.4548 | 0.1261 | 16.1041 |
| $N = 16$                                                 | 0.4166                                  | 0.1102                                          | 0.4272 | 0.4246 | 0.0990 | 5.7314  |
| $N = 32$                                                 | 0.4094                                  | 0.0761                                          | 0.4140 | 0.4123 | 0.0718 | 2.8690  |
| $N = 64$                                                 | 0.4050                                  | 0.0530                                          | 0.4068 | 0.4058 | 0.0521 | 1.1494  |
| <hr/>                                                    |                                         |                                                 |        |        |        |         |
| $p = 2, q = 1, V_{\text{rel}}(\mathbf{\Sigma}) = 0.8$    |                                         |                                                 |        |        |        |         |
| $N = 8$                                                  | 0.7847                                  | 0.1153                                          | 0.8314 | 0.7947 | 0.1473 | 4.8016  |
| $N = 16$                                                 | 0.7929                                  | 0.0866                                          | 0.8164 | 0.7963 | 0.1004 | 2.4327  |
| $N = 32$                                                 | 0.7969                                  | 0.0625                                          | 0.8090 | 0.7990 | 0.0672 | 2.2207  |
| $N = 64$                                                 | 0.7986                                  | 0.0445                                          | 0.8030 | 0.7983 | 0.0470 | -0.3966 |
| <hr/>                                                    |                                         |                                                 |        |        |        |         |
| $p = 4, q = 1, V_{\text{rel}}(\mathbf{\Sigma}) = 0.8$    |                                         |                                                 |        |        |        |         |



Table 2 (continued)

|                                                 | $\approx E[V_{\text{rel}}(\mathbf{S})]$ | $\approx \text{SD}[V_{\text{rel}}(\mathbf{S})]$ | Median | Mean   | ESD    | $T$     |
|-------------------------------------------------|-----------------------------------------|-------------------------------------------------|--------|--------|--------|---------|
| $N = 8$                                         | 0.7841                                  | 0.0920                                          | 0.8207 | 0.7927 | 0.1170 | 5.1526  |
| $N = 16$                                        | 0.7927                                  | 0.0692                                          | 0.8086 | 0.7945 | 0.0793 | 1.6175  |
| $N = 32$                                        | 0.7968                                  | 0.0498                                          | 0.8039 | 0.7967 | 0.0537 | -0.1966 |
| $N = 64$                                        | 0.7985                                  | 0.0354                                          | 0.8026 | 0.7993 | 0.0368 | 1.5352  |
| <hr/>                                           |                                         |                                                 |        |        |        |         |
| $p = 16, q = 1, V_{\text{rel}}(\Sigma) = 0.8$   |                                         |                                                 |        |        |        |         |
| $N = 8$                                         | 0.7838                                  | 0.0810                                          | 0.8153 | 0.7913 | 0.1049 | 5.0688  |
| $N = 16$                                        | 0.7926                                  | 0.0609                                          | 0.8067 | 0.7943 | 0.0696 | 1.7415  |
| $N = 32$                                        | 0.7968                                  | 0.0437                                          | 0.8044 | 0.7989 | 0.0452 | 3.3474  |
| $N = 64$                                        | 0.7985                                  | 0.0310                                          | 0.8019 | 0.7990 | 0.0323 | 1.0675  |
| <hr/>                                           |                                         |                                                 |        |        |        |         |
| $p = 64, q = 1, V_{\text{rel}}(\Sigma) = 0.8$   |                                         |                                                 |        |        |        |         |
| $N = 8$                                         | 0.7837                                  | 0.0787                                          | 0.8157 | 0.7915 | 0.1022 | 5.4258  |
| $N = 16$                                        | 0.7926                                  | 0.0592                                          | 0.8072 | 0.7956 | 0.0669 | 3.2349  |
| $N = 32$                                        | 0.7967                                  | 0.0425                                          | 0.8021 | 0.7967 | 0.0447 | -0.0106 |
| $N = 64$                                        | 0.7985                                  | 0.0301                                          | 0.8018 | 0.7989 | 0.0308 | 0.8231  |
| <hr/>                                           |                                         |                                                 |        |        |        |         |
| $p = 256, q = 1, V_{\text{rel}}(\Sigma) = 0.8$  |                                         |                                                 |        |        |        |         |
| $N = 8$                                         | 0.7836                                  | 0.0781                                          | 0.8150 | 0.7930 | 0.0994 | 6.6508  |
| $N = 16$                                        | 0.7926                                  | 0.0588                                          | 0.8058 | 0.7944 | 0.0663 | 1.9392  |
| $N = 32$                                        | 0.7967                                  | 0.0422                                          | 0.8033 | 0.7976 | 0.0455 | 1.3138  |
| $N = 64$                                        | 0.7985                                  | 0.0299                                          | 0.8010 | 0.7983 | 0.0303 | -0.5863 |
| <hr/>                                           |                                         |                                                 |        |        |        |         |
| $p = 1024, q = 1, V_{\text{rel}}(\Sigma) = 0.8$ |                                         |                                                 |        |        |        |         |
| $N = 8$                                         | 0.7836                                  | 0.0780                                          | 0.8140 | 0.7904 | 0.1011 | 4.7652  |
| $N = 16$                                        | 0.7926                                  | 0.0587                                          | 0.8081 | 0.7959 | 0.0665 | 3.5530  |
| $N = 32$                                        | 0.7967                                  | 0.0421                                          | 0.8026 | 0.7967 | 0.0448 | -0.0218 |
| $N = 64$                                        | 0.7985                                  | 0.0299                                          | 0.8012 | 0.7987 | 0.0307 | 0.4338  |

1513 **Table 3.** Summary statistics of selected simulation results for relative eigenvalue variance of  
 1514 correlation matrix  $V_{\text{rel}}(\mathbf{R})$ . Theoretical expectation ( $E[V_{\text{rel}}(\mathbf{R})]$ ) and (approximate) standard  
 1515 deviation ( $SD[V_{\text{rel}}(\mathbf{R})]$ ), as well as empirical median, mean, standard deviation (ESD), and  
 1516 bias of mean in standard error unit ( $T$ ) from 5000 simulation runs are shown for selected  
 1517 conditions. See Table 1 for further information and Table S3 for full results.

|                                          | $E[V_{\text{rel}}(\mathbf{R})]$ | $\approx SD[V_{\text{rel}}(\mathbf{R})]$ | Median | Mean   | ESD    | $T$     |
|------------------------------------------|---------------------------------|------------------------------------------|--------|--------|--------|---------|
| $p = 2, V_{\text{rel}}(\mathbf{P}) = 0$  |                                 |                                          |        |        |        |         |
| $N = 8$                                  | 0.1429                          | 0.1650                                   | 0.0792 | 0.1429 | 0.1635 | 0.0363  |
| $N = 16$                                 | 0.0667                          | 0.0856                                   | 0.0336 | 0.0679 | 0.0862 | 1.0235  |
| $N = 32$                                 | 0.0323                          | 0.0435                                   | 0.0163 | 0.0326 | 0.0427 | 0.6113  |
| $N = 64$                                 | 0.0159                          | 0.0219                                   | 0.0075 | 0.0156 | 0.0205 | -1.0380 |
| $p = 4, V_{\text{rel}}(\mathbf{P}) = 0$  |                                 |                                          |        |        |        |         |
| $N = 8$                                  | 0.1429                          | 0.0673                                   | 0.1332 | 0.1432 | 0.0673 | 0.3148  |
| $N = 16$                                 | 0.0667                          | 0.0349                                   | 0.0608 | 0.0661 | 0.0344 | -1.0696 |
| $N = 32$                                 | 0.0323                          | 0.0178                                   | 0.0292 | 0.0321 | 0.0175 | -0.6906 |
| $N = 64$                                 | 0.0159                          | 0.0090                                   | 0.0142 | 0.0157 | 0.0087 | -1.0749 |
| $p = 16, V_{\text{rel}}(\mathbf{P}) = 0$ |                                 |                                          |        |        |        |         |
| $N = 8$                                  | 0.1429                          | 0.0151                                   | 0.1411 | 0.1428 | 0.0151 | -0.0917 |
| $N = 16$                                 | 0.0667                          | 0.0078                                   | 0.0663 | 0.0669 | 0.0080 | 1.7743  |
| $N = 32$                                 | 0.0323                          | 0.0040                                   | 0.0319 | 0.0322 | 0.0039 | -1.7517 |
| $N = 64$                                 | 0.0159                          | 0.0020                                   | 0.0158 | 0.0159 | 0.0020 | 0.7127  |
| $p = 64, V_{\text{rel}}(\mathbf{P}) = 0$ |                                 |                                          |        |        |        |         |
| $N = 8$                                  | 0.1429                          | 0.0037                                   | 0.1425 | 0.1428 | 0.0036 | -0.4617 |
| $N = 16$                                 | 0.0667                          | 0.0019                                   | 0.0666 | 0.0667 | 0.0019 | 0.4407  |

|                                                   | $E[V_{\text{rel}}(\mathbf{R})]$ | $\approx \text{SD}[V_{\text{rel}}(\mathbf{R})]$ | Median | Mean   | ESD    | $T$     |
|---------------------------------------------------|---------------------------------|-------------------------------------------------|--------|--------|--------|---------|
| $N = 32$                                          | 0.0323                          | 0.0010                                          | 0.0322 | 0.0323 | 0.0010 | -0.0725 |
| $N = 64$                                          | 0.0159                          | 0.0005                                          | 0.0159 | 0.0159 | 0.0005 | -0.6525 |
| <hr/>                                             |                                 |                                                 |        |        |        |         |
| $p = 256, V_{\text{rel}}(\mathbf{P}) = 0$         |                                 |                                                 |        |        |        |         |
| $N = 8$                                           | 0.1429                          | 0.0009                                          | 0.1428 | 0.1429 | 0.0009 | 0.0105  |
| $N = 16$                                          | 0.0667                          | 0.0005                                          | 0.0667 | 0.0667 | 0.0005 | 1.8676  |
| $N = 32$                                          | 0.0323                          | 0.0002                                          | 0.0323 | 0.0323 | 0.0002 | -0.9701 |
| $N = 64$                                          | 0.0159                          | 0.0001                                          | 0.0159 | 0.0159 | 0.0001 | 0.3244  |
| <hr/>                                             |                                 |                                                 |        |        |        |         |
| $p = 1024, V_{\text{rel}}(\mathbf{P}) = 0$        |                                 |                                                 |        |        |        |         |
| $N = 8$                                           | 0.1429                          | 0.0002                                          | 0.1428 | 0.1429 | 0.0002 | -0.9639 |
| $N = 16$                                          | 0.0667                          | 0.0001                                          | 0.0667 | 0.0667 | 0.0001 | 0.5220  |
| $N = 32$                                          | 0.0323                          | 0.0001                                          | 0.0323 | 0.0323 | 0.0001 | -1.8393 |
| $N = 64$                                          | 0.0159                          | 0.0000                                          | 0.0159 | 0.0159 | 0.0000 | -0.0357 |
| <hr/>                                             |                                 |                                                 |        |        |        |         |
| $p = 2, q = 1, V_{\text{rel}}(\mathbf{P}) = 0.4$  |                                 |                                                 |        |        |        |         |
| $N = 8$                                           | 0.4318                          | 0.2495                                          | 0.4362 | 0.4294 | 0.2516 | -0.6571 |
| $N = 16$                                          | 0.4111                          | 0.1844                                          | 0.4230 | 0.4147 | 0.1832 | 1.3640  |
| $N = 32$                                          | 0.4046                          | 0.1326                                          | 0.4056 | 0.4041 | 0.1322 | -0.2806 |
| $N = 64$                                          | 0.4021                          | 0.0944                                          | 0.4058 | 0.4025 | 0.0954 | 0.3294  |
| <hr/>                                             |                                 |                                                 |        |        |        |         |
| $p = 4, q = 1, V_{\text{rel}}(\mathbf{P}) = 0.4$  |                                 |                                                 |        |        |        |         |
| $N = 8$                                           | 0.4318                          | 0.2078                                          | 0.4314 | 0.4287 | 0.1750 | -1.2271 |
| $N = 16$                                          | 0.4111                          | 0.1420                                          | 0.4141 | 0.4093 | 0.1317 | -0.9769 |
| $N = 32$                                          | 0.4046                          | 0.0988                                          | 0.4054 | 0.4034 | 0.0960 | -0.8743 |
| $N = 64$                                          | 0.4021                          | 0.0693                                          | 0.4033 | 0.4022 | 0.0687 | 0.1270  |
| <hr/>                                             |                                 |                                                 |        |        |        |         |
| $p = 16, q = 1, V_{\text{rel}}(\mathbf{P}) = 0.4$ |                                 |                                                 |        |        |        |         |
| $N = 8$                                           | 0.4318                          | 0.1682                                          | 0.4321 | 0.4329 | 0.1391 | 0.5780  |

|                                                     | $E[V_{\text{rel}}(\mathbf{R})]$ | $\approx \text{SD}[V_{\text{rel}}(\mathbf{R})]$ | Median | Mean   | ESD    | $T$     |
|-----------------------------------------------------|---------------------------------|-------------------------------------------------|--------|--------|--------|---------|
| $N = 16$                                            | 0.4111                          | 0.1149                                          | 0.4149 | 0.4120 | 0.1073 | 0.5980  |
| $N = 32$                                            | 0.4046                          | 0.0799                                          | 0.4084 | 0.4055 | 0.0773 | 0.7996  |
| $N = 64$                                            | 0.4021                          | 0.0561                                          | 0.4030 | 0.4021 | 0.0552 | -0.0283 |
| <hr/>                                               |                                 |                                                 |        |        |        |         |
| $p = 64, q = 1, V_{\text{rel}}(\mathbf{P}) = 0.4$   |                                 |                                                 |        |        |        |         |
| $N = 8$                                             | 0.4318                          | 0.1598                                          | 0.4366 | 0.4332 | 0.1304 | 0.7802  |
| $N = 16$                                            | 0.4111                          | 0.1092                                          | 0.4144 | 0.4129 | 0.1015 | 1.2079  |
| $N = 32$                                            | 0.4046                          | 0.0760                                          | 0.4052 | 0.4039 | 0.0733 | -0.6457 |
| $N = 64$                                            | 0.4021                          | 0.0533                                          | 0.4029 | 0.4021 | 0.0535 | 0.0493  |
| <hr/>                                               |                                 |                                                 |        |        |        |         |
| $p = 256, q = 1, V_{\text{rel}}(\mathbf{P}) = 0.4$  |                                 |                                                 |        |        |        |         |
| $N = 8$                                             | 0.4318                          | 0.1578                                          | 0.4348 | 0.4343 | 0.1278 | 1.3865  |
| $N = 16$                                            | 0.4111                          | 0.1078                                          | 0.4118 | 0.4091 | 0.0995 | -1.4526 |
| $N = 32$                                            | 0.4046                          | 0.0750                                          | 0.4078 | 0.4052 | 0.0726 | 0.5664  |
| $N = 64$                                            | 0.4021                          | 0.0526                                          | 0.4033 | 0.4024 | 0.0522 | 0.4500  |
| <hr/>                                               |                                 |                                                 |        |        |        |         |
| $p = 1024, q = 1, V_{\text{rel}}(\mathbf{P}) = 0.4$ |                                 |                                                 |        |        |        |         |
| $N = 8$                                             | 0.4318                          | 0.1573                                          | 0.4266 | 0.4286 | 0.1287 | -1.7550 |
| $N = 16$                                            | 0.4111                          | 0.1075                                          | 0.4127 | 0.4111 | 0.1008 | -0.0454 |
| $N = 32$                                            | 0.4046                          | 0.0748                                          | 0.4072 | 0.4055 | 0.0726 | 0.8769  |
| $N = 64$                                            | 0.4021                          | 0.0524                                          | 0.4035 | 0.4024 | 0.0524 | 0.4578  |
| <hr/>                                               |                                 |                                                 |        |        |        |         |
| $p = 2, q = 1, V_{\text{rel}}(\mathbf{P}) = 0.8$    |                                 |                                                 |        |        |        |         |
| $N = 8$                                             | 0.7831                          | 0.1596                                          | 0.8250 | 0.7853 | 0.1571 | 0.9790  |
| $N = 16$                                            | 0.7918                          | 0.1015                                          | 0.8141 | 0.7928 | 0.1033 | 0.6253  |
| $N = 32$                                            | 0.7961                          | 0.0674                                          | 0.8076 | 0.7976 | 0.0680 | 1.5536  |
| $N = 64$                                            | 0.7981                          | 0.0462                                          | 0.8024 | 0.7976 | 0.0473 | -0.6617 |
| <hr/>                                               |                                 |                                                 |        |        |        |         |
| $p = 4, q = 1, V_{\text{rel}}(\mathbf{P}) = 0.8$    |                                 |                                                 |        |        |        |         |

|                                                     | $E[V_{\text{rel}}(\mathbf{R})]$ | $\approx \text{SD}[V_{\text{rel}}(\mathbf{R})]$ | Median | Mean   | ESD    | $T$     |
|-----------------------------------------------------|---------------------------------|-------------------------------------------------|--------|--------|--------|---------|
| $N = 8$                                             | 0.7831                          | 0.1073                                          | 0.8149 | 0.7840 | 0.1249 | 0.4605  |
| $N = 16$                                            | 0.7918                          | 0.0733                                          | 0.8059 | 0.7913 | 0.0815 | -0.4682 |
| $N = 32$                                            | 0.7961                          | 0.0510                                          | 0.8027 | 0.7953 | 0.0543 | -1.0173 |
| $N = 64$                                            | 0.7981                          | 0.0358                                          | 0.8019 | 0.7987 | 0.0370 | 1.2077  |
| <hr/>                                               |                                 |                                                 |        |        |        |         |
| $p = 16, q = 1, V_{\text{rel}}(\mathbf{P}) = 0.8$   |                                 |                                                 |        |        |        |         |
| $N = 8$                                             | 0.7831                          | 0.0939                                          | 0.8102 | 0.7835 | 0.1116 | 0.2370  |
| $N = 16$                                            | 0.7918                          | 0.0642                                          | 0.8045 | 0.7913 | 0.0716 | -0.5326 |
| $N = 32$                                            | 0.7961                          | 0.0446                                          | 0.8035 | 0.7976 | 0.0457 | 2.4043  |
| $N = 64$                                            | 0.7981                          | 0.0313                                          | 0.8013 | 0.7984 | 0.0325 | 0.7108  |
| <hr/>                                               |                                 |                                                 |        |        |        |         |
| $p = 64, q = 1, V_{\text{rel}}(\mathbf{P}) = 0.8$   |                                 |                                                 |        |        |        |         |
| $N = 8$                                             | 0.7831                          | 0.0912                                          | 0.8098 | 0.7841 | 0.1083 | 0.6205  |
| $N = 16$                                            | 0.7918                          | 0.0623                                          | 0.8046 | 0.7928 | 0.0687 | 0.9579  |
| $N = 32$                                            | 0.7961                          | 0.0433                                          | 0.8009 | 0.7955 | 0.0452 | -0.9741 |
| $N = 64$                                            | 0.7981                          | 0.0304                                          | 0.8012 | 0.7983 | 0.0309 | 0.4419  |
| <hr/>                                               |                                 |                                                 |        |        |        |         |
| $p = 256, q = 1, V_{\text{rel}}(\mathbf{P}) = 0.8$  |                                 |                                                 |        |        |        |         |
| $N = 8$                                             | 0.7831                          | 0.0905                                          | 0.8098 | 0.7857 | 0.1056 | 1.7052  |
| $N = 16$                                            | 0.7918                          | 0.0618                                          | 0.8031 | 0.7915 | 0.0681 | -0.3408 |
| $N = 32$                                            | 0.7961                          | 0.0430                                          | 0.8022 | 0.7963 | 0.0460 | 0.3738  |
| $N = 64$                                            | 0.7981                          | 0.0302                                          | 0.8004 | 0.7977 | 0.0305 | -0.9565 |
| <hr/>                                               |                                 |                                                 |        |        |        |         |
| $p = 1024, q = 1, V_{\text{rel}}(\mathbf{P}) = 0.8$ |                                 |                                                 |        |        |        |         |
| $N = 8$                                             | 0.7831                          | 0.0903                                          | 0.8088 | 0.7830 | 0.1074 | -0.0831 |
| $N = 16$                                            | 0.7918                          | 0.0617                                          | 0.8057 | 0.7930 | 0.0683 | 1.2443  |
| $N = 32$                                            | 0.7961                          | 0.0429                                          | 0.8014 | 0.7954 | 0.0454 | -0.9758 |
| $N = 64$                                            | 0.7981                          | 0.0301                                          | 0.8006 | 0.7981 | 0.0308 | 0.0710  |

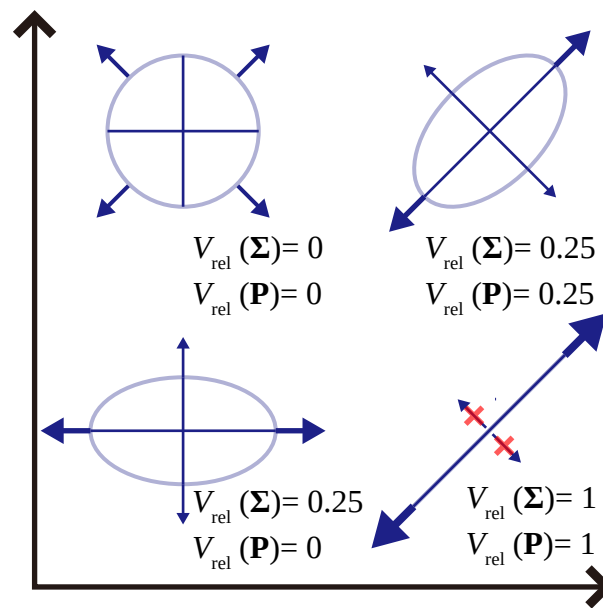

**Figure 1.** Schematic illustration of eigenvalue dispersion indices in bivariate cases. Ellipses representing equiprobability contours are shown on the Cartesian space of two hypothetical variables for four conditions, as well as the relative eigenvalue variance of the corresponding covariance and correlation matrices ( $V_{\text{rel}}(\Sigma)$  and  $V_{\text{rel}}(\mathbf{P})$ , respectively). The scale is arbitrary but identical for the two axes. The axes of each ellipse are proportional to square roots of the two eigenvalues of the respective covariance matrix.  $V_{\text{rel}}(\Sigma)$  represents eccentricity of variation and is sensitive to differing scale changes between axes but not to rotation (change of eigenvectors), whereas  $V_{\text{rel}}(\mathbf{P})$  represents magnitude of correlation and is insensitive to scale changes. Arrows schematically represent variation along major axes (whose directions are arbitrary when  $V_{\text{rel}}(\Sigma) = 0$ ).

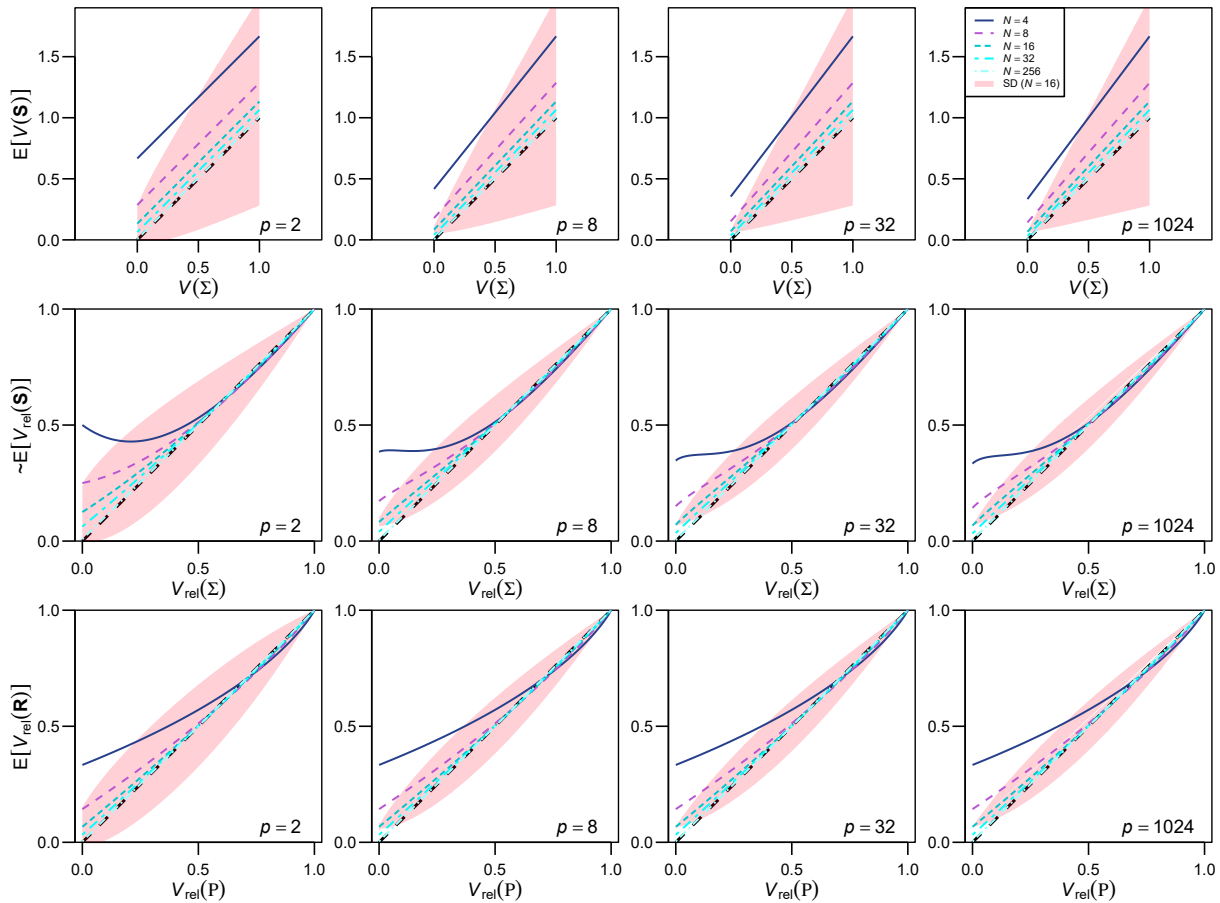

**Figure 2.** Profiles of the expectations of eigenvalue dispersion measures in selected conditions. The expectations of  $V(\mathbf{S})$  (top row),  $V_{\text{rel}}(\mathbf{S})$  (approximate; middle row), and  $V_{\text{rel}}(\mathbf{R})$  (bottom row) are drawn with solid lines, for  $p = 2, 8, 32,$  and  $1024$  (from left to right) and for  $N = 4, 8, 16, 32,$  and  $256$  (from top to bottom on the left end of each box). In all cases,  $n = N - 1$ . The breadth of one standard deviation at  $N = 16$  is also shown around the mean profiles with pink fills; these are approximations for  $V_{\text{rel}}(\mathbf{S})$  and for  $V_{\text{rel}}(\mathbf{R})$  with  $p > 2$  (exact for  $V_{\text{rel}}(\mathbf{R})$  with  $p = 2$ ). Note that actual distributions might be skewed unlike these fills. There are generally many suites of eigenvalues corresponding to a single value of  $V_{\text{rel}}$ , and  $E[V_{\text{rel}}(\mathbf{R})]$  can also depend on eigenvector configurations; the profiles shown here are from such eigenvalue configurations that there is one large eigenvalue, with the rest being equally small, in which case  $E[V_{\text{rel}}(\mathbf{R})]$  does not depend on eigenvector configurations. The population covariance matrix  $\Sigma$  is scaled so that  $\text{tr}(\Sigma) = p(p - 1)^{-1/2}$ . The initial decrease of the  $E[V_{\text{rel}}(\mathbf{S})]$  profiles in some cases seems to be an artifact of approximation. See text for further technical details.

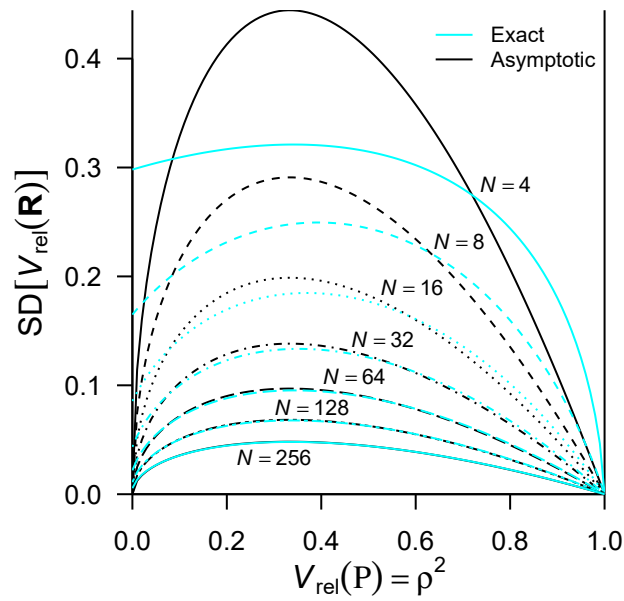

**Figure 3.** Comparison of exact and asymptotic standard deviations of  $V_{\text{rel}}(\mathbf{R})$ . Profiles of the exact (cyan lines) and asymptotic (black lines) standard deviations for  $p = 2$  are shown across the entire range of the population value  $V_{\text{rel}}(\mathbf{P})$ , for  $N = 4, 8, 16, 32, 64, 128$ , and  $256$  (from top to bottom as labeled; shown with different line styles). Note that the asymptotic profiles converge to 0 when  $V_{\text{rel}}(\mathbf{P}) = 0$ .



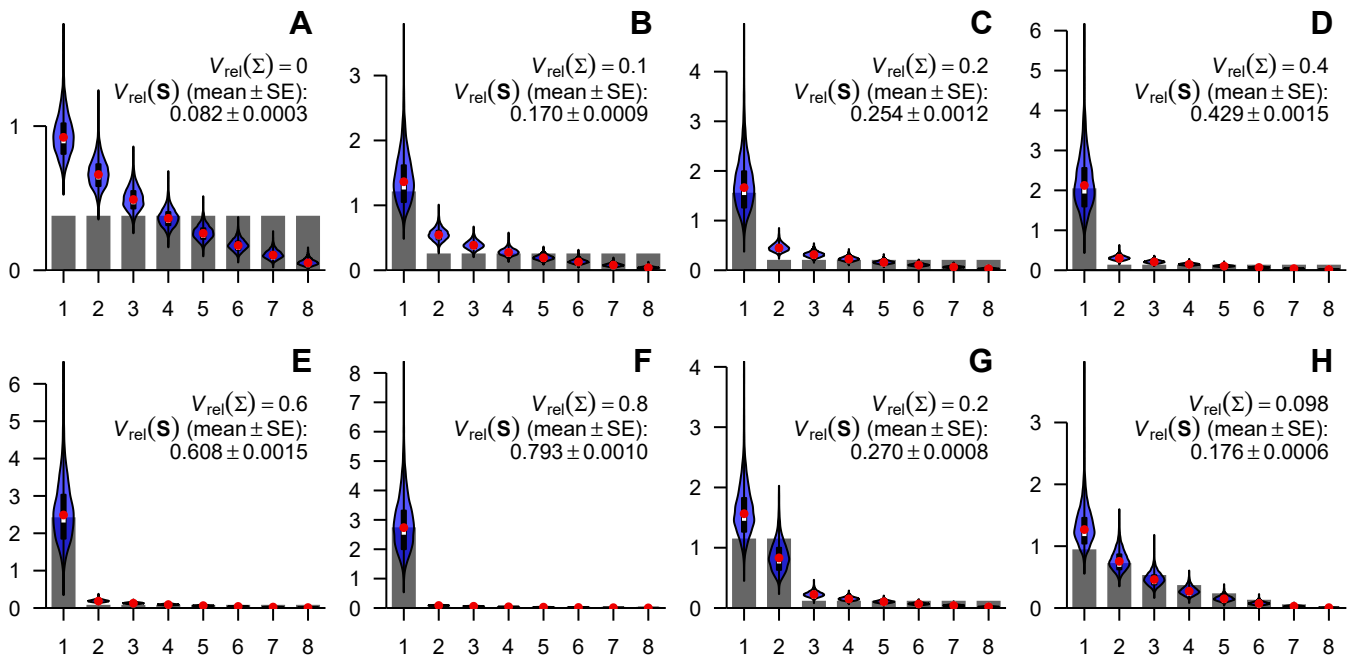

**Figure 4.** Selected population eigenvalue structures used in simulations and distributions of sample eigenvalues, examples for  $p = 8$ . The eigenvalues of population covariance matrix are shown as scree plots, and distributions of sample eigenvalues with  $N = 16$  are shown as violin plots. **A**, null condition; **B–G**,  $q$ -large  $\lambda$  conditions,  $q = 1$  (**B–F**) or 2 (**G**), with  $V_{\text{rel}}(\Sigma) = 0.1, 0.2, 0.4, 0.6, 0.8$ , and 0.2, respectively; **H**, quadratically decreasing  $\lambda$  condition. Red dots denote empirical means of sample eigenvalues, whereas white bars (mostly overlapping with red dots) denote medians. Thick black bars within violins denote interquartile ranges. Note different scales of vertical axes.

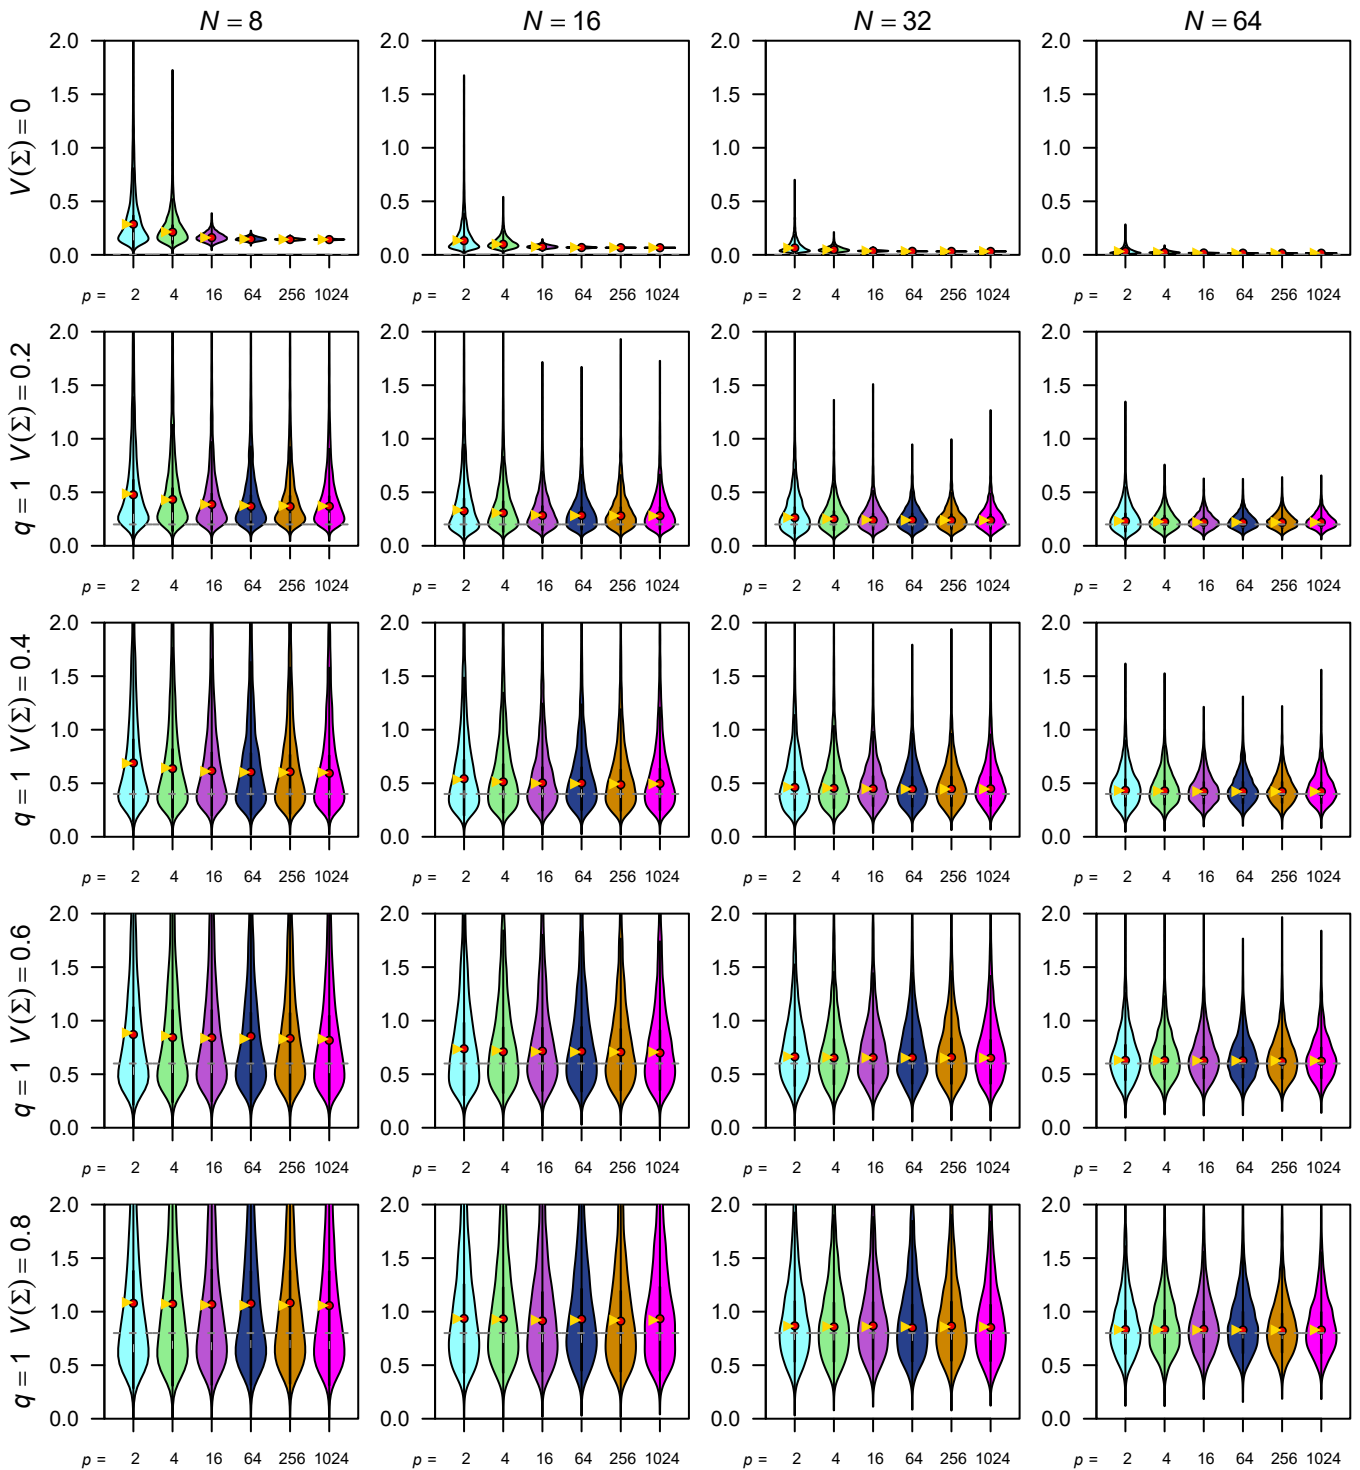

**Figure 5.** Selected results of simulation for the eigenvalue variance of covariance matrix  $V(\mathbf{S})$ . Empirical distributions of simulated  $V(\mathbf{S})$  values are shown as violin plots, whose tails extend to the extreme values. Red dots denote empirical means, whereas yellow triangles denote expectations (which are exact). Thick black bars within violins denote interquartile ranges, with white bars near the center (in most cases overlapping with red dots) denote medians. Rows of panels correspond to varying population values of  $V(\Sigma)$  (under 1-large  $\lambda$  conditions), whereas columns correspond to varying sample size  $N$ . Columns within each panel correspond to varying number of variables  $p$ . Note that extreme values in some panels are cropped for visual clarity. See Figure S2–S4 for full results.

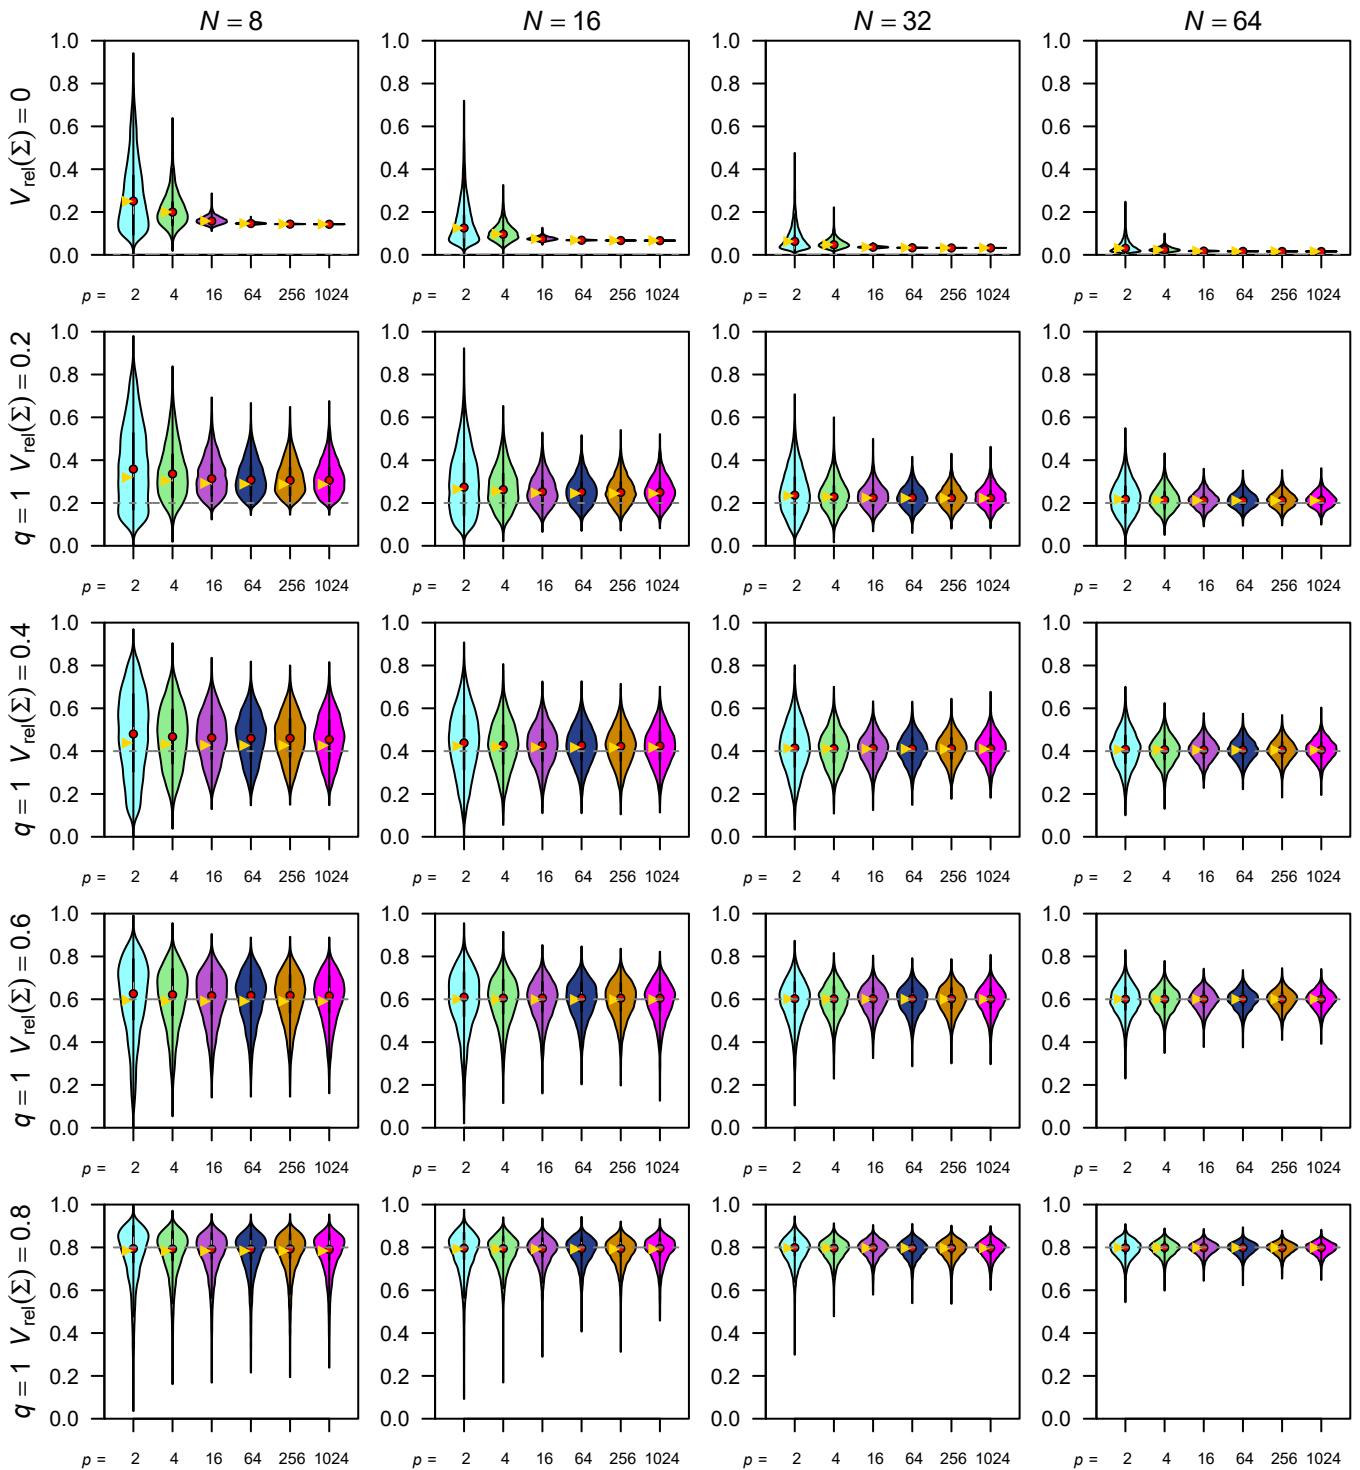

**Figure 6.** Selected results of simulation for the relative eigenvalue variance of covariance matrix  $V_{\text{rel}}(\mathbf{S})$ . Empirical distributions of simulated  $V_{\text{rel}}(\mathbf{S})$  values are shown as violin plots. Yellow triangles denote expectations (which are approximate except under the null condition). Rows of panels correspond to varying population values of  $V_{\text{rel}}(\Sigma)$  (under 1-large  $\lambda$  conditions). Other legends are as in Fig. 5. See Figure S4–S6 for full results.

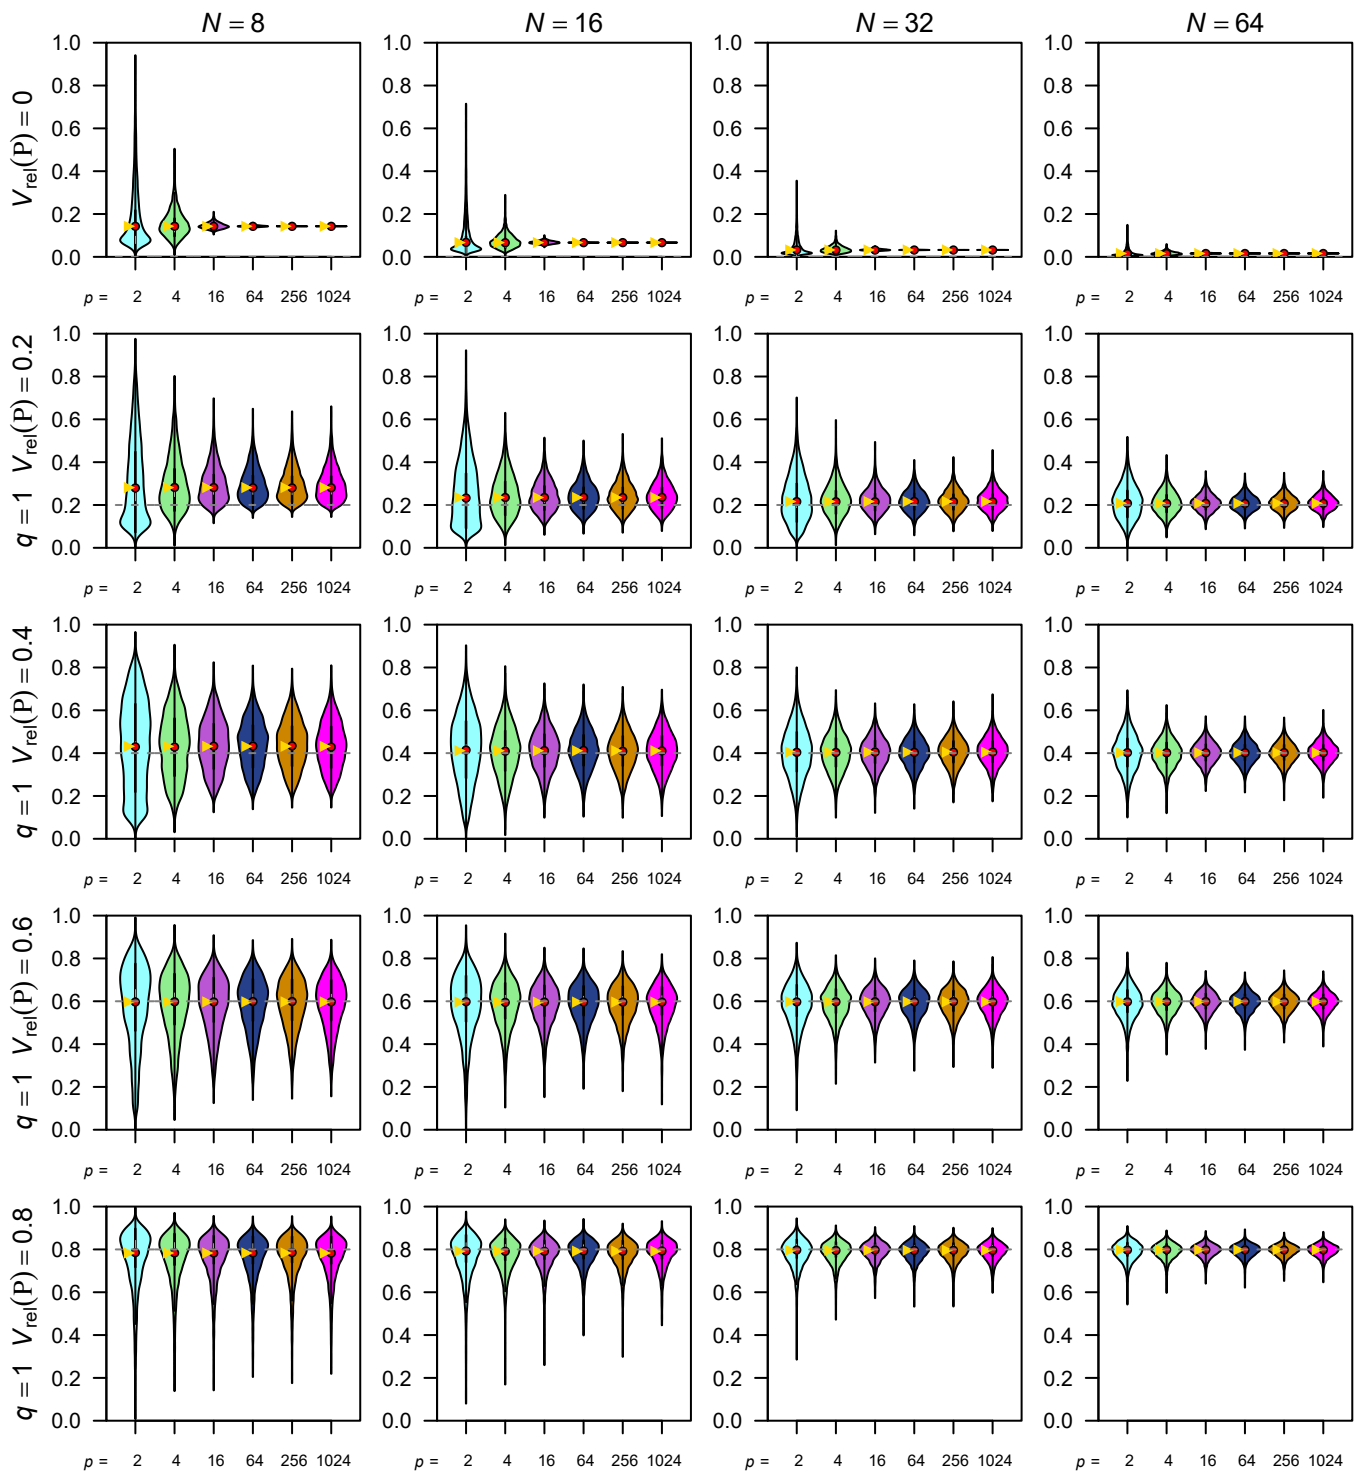

**Figure 7.** Selected results of simulation for the relative eigenvalue variance of correlation matrix  $V_{\text{rel}}(\mathbf{R})$ . Empirical distributions of simulated  $V_{\text{rel}}(\mathbf{R})$  values are shown as violin plots. Yellow triangles denote expectations (which are exact). Rows of panels correspond to varying population values of  $V_{\text{rel}}(\mathbf{P})$  (under 1-large  $\lambda$  conditions). Other legends are as in Fig. 5. See Figure S4, S7, and S8 for full results.
