# Supplementary material for: Statistics of eigenvalue dispersion indices: quantifying the magnitude of phenotypic integration
Source: bioRxiv or medRxiv preprint supplement (doi:10.1101/2021.06.19.449119), 2021-08-07
Supplement: Supplementary file [file media-1.pdf]

**Table S1.** Summary statistics of simulation results for  $V(\mathbf{S})$ . Analytical expectation ( $E[V(\mathbf{S})]$ ) and standard deviation ( $SD[V(\mathbf{S})]$ ), as well as empirical median, mean, standard deviation (ESD), bias in standard error unit ( $T = \sqrt{5000} \{ \text{Mean} - E[V(\mathbf{S})] \} / \text{ESD}$ , which should roughly follow  $t_{4999}$  if the expectation is exact), and critical points or power (for null and non-null conditions, respectively) at  $\alpha = 0.05$  and  $0.01$  (CP/Pow. 5% and 1%; the latter obtained from the former with same  $N$  and  $p$ ) from 5000 simulation runs are shown.

|                         | $E[V(\mathbf{S})]$ | $SD[V(\mathbf{S})]$ | Median | Mean   | ESD    | $T$     | CP 5%  | CP 1%  |
|-------------------------|--------------------|---------------------|--------|--------|--------|---------|--------|--------|
| $p = 2, V(\Sigma) = 0$  |                    |                     |        |        |        |         |        |        |
| $N = 4$                 | 0.6667             | 1.0184              | 0.3299 | 0.6857 | 1.0338 | 1.2996  | 2.5760 | 5.0374 |
| $N = 8$                 | 0.2857             | 0.3582              | 0.1731 | 0.2876 | 0.3464 | 0.3845  | 0.9689 | 1.6625 |
| $N = 16$                | 0.1333             | 0.1501              | 0.0876 | 0.1330 | 0.1466 | -0.1703 | 0.4143 | 0.6728 |
| $N = 32$                | 0.0645             | 0.0686              | 0.0438 | 0.0646 | 0.0689 | 0.0489  | 0.1959 | 0.3342 |
| $N = 64$                | 0.0317             | 0.0327              | 0.0221 | 0.0315 | 0.0315 | -0.6336 | 0.0947 | 0.1414 |
| $N = 128$               | 0.0157             | 0.0160              | 0.0109 | 0.0155 | 0.0152 | -1.3106 | 0.0463 | 0.0692 |
| $N = 256$               | 0.0078             | 0.0079              | 0.0054 | 0.0079 | 0.0079 | 0.5012  | 0.0234 | 0.0367 |
| $p = 4, V(\Sigma) = 0$  |                    |                     |        |        |        |         |        |        |
| $N = 4$                 | 0.5000             | 0.4811              | 0.3536 | 0.5028 | 0.4889 | 0.4064  | 1.4161 | 2.3918 |
| $N = 8$                 | 0.2143             | 0.1551              | 0.1734 | 0.2131 | 0.1534 | -0.5437 | 0.5055 | 0.7688 |
| $N = 16$                | 0.1000             | 0.0602              | 0.0861 | 0.0996 | 0.0603 | -0.4826 | 0.2148 | 0.3091 |
| $N = 32$                | 0.0484             | 0.0261              | 0.0429 | 0.0481 | 0.0261 | -0.8676 | 0.0972 | 0.1385 |
| $N = 64$                | 0.0238             | 0.0120              | 0.0216 | 0.0239 | 0.0119 | 0.5321  | 0.0461 | 0.0605 |
| $N = 128$               | 0.0118             | 0.0058              | 0.0107 | 0.0118 | 0.0059 | -0.1839 | 0.0229 | 0.0297 |
| $N = 256$               | 0.0059             | 0.0028              | 0.0054 | 0.0058 | 0.0028 | -1.0280 | 0.0110 | 0.0141 |
| $p = 8, V(\Sigma) = 0$  |                    |                     |        |        |        |         |        |        |
| $N = 4$                 | 0.4167             | 0.2651              | 0.3540 | 0.4186 | 0.2654 | 0.5067  | 0.9252 | 1.2858 |
| $N = 8$                 | 0.1786             | 0.0811              | 0.1654 | 0.1793 | 0.0806 | 0.6594  | 0.3282 | 0.4431 |
| $N = 16$                | 0.0833             | 0.0297              | 0.0790 | 0.0835 | 0.0296 | 0.4185  | 0.1382 | 0.1726 |
| $N = 32$                | 0.0403             | 0.0121              | 0.0390 | 0.0407 | 0.0124 | 1.9188  | 0.0629 | 0.0766 |
| $N = 64$                | 0.0198             | 0.0054              | 0.0193 | 0.0199 | 0.0053 | 0.2683  | 0.0297 | 0.0351 |
| $N = 128$               | 0.0098             | 0.0025              | 0.0096 | 0.0098 | 0.0025 | -0.6006 | 0.0144 | 0.0167 |
| $N = 256$               | 0.0049             | 0.0012              | 0.0048 | 0.0049 | 0.0012 | 0.5840  | 0.0071 | 0.0083 |
| $p = 16, V(\Sigma) = 0$ |                    |                     |        |        |        |         |        |        |
| $N = 4$                 | 0.3750             | 0.1616              | 0.3480 | 0.3792 | 0.1663 | 1.7786  | 0.6905 | 0.9197 |
| $N = 8$                 | 0.1607             | 0.0477              | 0.1559 | 0.1614 | 0.0478 | 1.0293  | 0.2488 | 0.3007 |
| $N = 16$                | 0.0750             | 0.0166              | 0.0737 | 0.0752 | 0.0168 | 0.8714  | 0.1055 | 0.1231 |
| $N = 32$                | 0.0363             | 0.0064              | 0.0358 | 0.0362 | 0.0064 | -0.6019 | 0.0478 | 0.0545 |
| $N = 64$                | 0.0179             | 0.0027              | 0.0177 | 0.0179 | 0.0027 | 0.9825  | 0.0228 | 0.0253 |
| $N = 128$               | 0.0089             | 0.0012              | 0.0088 | 0.0088 | 0.0012 | -0.6922 | 0.0110 | 0.0120 |
| $N = 256$               | 0.0044             | 0.0006              | 0.0044 | 0.0044 | 0.0006 | 1.3830  | 0.0054 | 0.0059 |
| $p = 32, V(\Sigma) = 0$ |                    |                     |        |        |        |         |        |        |
| $N = 4$                 | 0.3542             | 0.1053              | 0.3436 | 0.3559 | 0.1051 | 1.1876  | 0.5454 | 0.6531 |
| $N = 8$                 | 0.1518             | 0.0304              | 0.1482 | 0.1510 | 0.0307 | -1.8948 | 0.2065 | 0.2322 |
| $N = 16$                | 0.0708             | 0.0102              | 0.0702 | 0.0708 | 0.0102 | -0.0003 | 0.0890 | 0.0971 |
| $N = 32$                | 0.0343             | 0.0038              | 0.0341 | 0.0342 | 0.0037 | -0.4806 | 0.0405 | 0.0437 |
| $N = 64$                | 0.0169             | 0.0015              | 0.0168 | 0.0169 | 0.0015 | -0.6023 | 0.0194 | 0.0206 |
| $N = 128$               | 0.0084             | 0.0006              | 0.0083 | 0.0084 | 0.0006 | 1.0563  | 0.0094 | 0.0100 |
| $N = 256$               | 0.0042             | 0.0003              | 0.0042 | 0.0042 | 0.0003 | 0.0593  | 0.0046 | 0.0049 |

(continued)

**Table S1.** (continued)

|                                        | $E[V(\mathbf{S})]$ | $SD[V(\mathbf{S})]$ | Median | Mean   | ESD     | $T$     | CP 5%  | CP 1%  |
|----------------------------------------|--------------------|---------------------|--------|--------|---------|---------|--------|--------|
| $p = 64, V(\boldsymbol{\Sigma}) = 0$   |                    |                     |        |        |         |         |        |        |
| $N = 4$                                | 0.3438             | 0.07123             | 0.3388 | 0.3445 | 0.07210 | 0.7602  | 0.4670 | 0.5373 |
| $N = 8$                                | 0.1473             | 0.02028             | 0.1464 | 0.1477 | 0.02043 | 1.2947  | 0.1836 | 0.2027 |
| $N = 16$                               | 0.0688             | 0.00665             | 0.0688 | 0.0689 | 0.00663 | 1.7306  | 0.0801 | 0.0856 |
| $N = 32$                               | 0.0333             | 0.00236             | 0.0332 | 0.0333 | 0.00238 | 0.6721  | 0.0374 | 0.0391 |
| $N = 64$                               | 0.0164             | 0.00089             | 0.0163 | 0.0164 | 0.00088 | -0.4407 | 0.0178 | 0.0184 |
| $N = 128$                              | 0.0081             | 0.00036             | 0.0081 | 0.0081 | 0.00036 | -1.3996 | 0.0087 | 0.0090 |
| $N = 256$                              | 0.0040             | 0.00015             | 0.0040 | 0.0040 | 0.00016 | 0.6570  | 0.0043 | 0.0044 |
| $p = 128, V(\boldsymbol{\Sigma}) = 0$  |                    |                     |        |        |         |         |        |        |
| $N = 4$                                | 0.3385             | 0.04924             | 0.3373 | 0.3390 | 0.04854 | 0.7364  | 0.4213 | 0.4614 |
| $N = 8$                                | 0.1451             | 0.01392             | 0.1446 | 0.1451 | 0.01379 | 0.1097  | 0.1684 | 0.1793 |
| $N = 16$                               | 0.0677             | 0.00450             | 0.0676 | 0.0677 | 0.00450 | 0.4354  | 0.0753 | 0.0788 |
| $N = 32$                               | 0.0328             | 0.00156             | 0.0328 | 0.0328 | 0.00155 | 2.7368  | 0.0354 | 0.0366 |
| $N = 64$                               | 0.0161             | 0.00057             | 0.0161 | 0.0161 | 0.00057 | -0.2231 | 0.0171 | 0.0175 |
| $N = 128$                              | 0.0080             | 0.00022             | 0.0080 | 0.0080 | 0.00022 | -1.7313 | 0.0084 | 0.0085 |
| $N = 256$                              | 0.0040             | 0.00009             | 0.0040 | 0.0040 | 0.00009 | -0.0648 | 0.0041 | 0.0042 |
| $p = 256, V(\boldsymbol{\Sigma}) = 0$  |                    |                     |        |        |         |         |        |        |
| $N = 4$                                | 0.3359             | 0.03442             | 0.3340 | 0.3354 | 0.03447 | -1.1403 | 0.3932 | 0.4240 |
| $N = 8$                                | 0.1440             | 0.00969             | 0.1436 | 0.1440 | 0.00993 | 0.1215  | 0.1608 | 0.1691 |
| $N = 16$                               | 0.0672             | 0.00311             | 0.0672 | 0.0672 | 0.00307 | 0.9739  | 0.0722 | 0.0744 |
| $N = 32$                               | 0.0325             | 0.00106             | 0.0325 | 0.0325 | 0.00106 | -0.8132 | 0.0343 | 0.0350 |
| $N = 64$                               | 0.0160             | 0.00038             | 0.0160 | 0.0160 | 0.00038 | 0.0842  | 0.0166 | 0.0169 |
| $N = 128$                              | 0.0079             | 0.00014             | 0.0079 | 0.0079 | 0.00014 | 0.0262  | 0.0082 | 0.0083 |
| $N = 256$                              | 0.0040             | 0.00005             | 0.0040 | 0.0040 | 0.00005 | -0.3846 | 0.0040 | 0.0041 |
| $p = 1024, V(\boldsymbol{\Sigma}) = 0$ |                    |                     |        |        |         |         |        |        |
| $N = 4$                                | 0.3340             | 0.01706             | 0.3342 | 0.3343 | 0.01717 | 1.2126  | 0.3628 | 0.3745 |
| $N = 8$                                | 0.1431             | 0.00479             | 0.1430 | 0.1431 | 0.00480 | -0.6874 | 0.1510 | 0.1550 |
| $N = 16$                               | 0.0668             | 0.00153             | 0.0668 | 0.0668 | 0.00151 | 1.7324  | 0.0694 | 0.0705 |
| $N = 32$                               | 0.0323             | 0.00052             | 0.0323 | 0.0323 | 0.00052 | 0.3227  | 0.0332 | 0.0336 |
| $N = 64$                               | 0.0159             | 0.00018             | 0.0159 | 0.0159 | 0.00018 | 0.3522  | 0.0162 | 0.0163 |
| $N = 128$                              | 0.0079             | 0.00006             | 0.0079 | 0.0079 | 0.00006 | -1.1216 | 0.0080 | 0.0080 |
| $N = 256$                              | 0.0039             | 0.00002             | 0.0039 | 0.0039 | 0.00002 | 0.7640  | 0.0040 | 0.0040 |

(continued)

**Table S1.** (continued)

|                                 | $E[V(\mathbf{S})]$ | $SD[V(\mathbf{S})]$ | Median | Mean   | ESD    | $T$     | Pow. 5% | Pow. 1% |
|---------------------------------|--------------------|---------------------|--------|--------|--------|---------|---------|---------|
| $p = 2, q = 1, V(\Sigma) = 0.1$ |                    |                     |        |        |        |         |         |         |
| $N = 4$                         | 0.7667             | 1.2893              | 0.3299 | 0.7801 | 1.2981 | 0.7327  | 0.0658  | 0.0182  |
| $N = 8$                         | 0.3857             | 0.5163              | 0.2079 | 0.3837 | 0.5087 | -0.2776 | 0.0888  | 0.0314  |
| $N = 16$                        | 0.2333             | 0.2592              | 0.1451 | 0.2223 | 0.2419 | -3.2291 | 0.1566  | 0.0528  |
| $N = 32$                        | 0.1645             | 0.1496              | 0.1244 | 0.1667 | 0.1497 | 1.0124  | 0.3126  | 0.1190  |
| $N = 64$                        | 0.1317             | 0.0943              | 0.1124 | 0.1327 | 0.0954 | 0.6805  | 0.5860  | 0.3762  |
| $N = 128$                       | 0.1157             | 0.0626              | 0.1055 | 0.1145 | 0.0623 | -1.3981 | 0.8884  | 0.7414  |
| $N = 256$                       | 0.1078             | 0.0429              | 0.1042 | 0.1090 | 0.0429 | 1.9180  | 0.9972  | 0.9806  |
| $p = 2, q = 1, V(\Sigma) = 0.2$ |                    |                     |        |        |        |         |         |         |
| $N = 4$                         | 0.8667             | 1.5241              | 0.3716 | 0.9230 | 1.6659 | 2.3912  | 0.0866  | 0.0248  |
| $N = 8$                         | 0.4857             | 0.6465              | 0.2615 | 0.4777 | 0.6313 | -0.8980 | 0.1372  | 0.0500  |
| $N = 16$                        | 0.3333             | 0.3429              | 0.2311 | 0.3257 | 0.3300 | -1.6266 | 0.2760  | 0.1186  |
| $N = 32$                        | 0.2645             | 0.2067              | 0.2101 | 0.2633 | 0.2065 | -0.4030 | 0.5362  | 0.2804  |
| $N = 64$                        | 0.2317             | 0.1341              | 0.2066 | 0.2312 | 0.1350 | -0.2979 | 0.8704  | 0.7194  |
| $N = 128$                       | 0.2157             | 0.0907              | 0.2048 | 0.2160 | 0.0899 | 0.1913  | 0.9952  | 0.9814  |
| $N = 256$                       | 0.2078             | 0.0627              | 0.2028 | 0.2084 | 0.0625 | 0.5752  | 1.0000  | 1.0000  |
| $p = 2, q = 1, V(\Sigma) = 0.4$ |                    |                     |        |        |        |         |         |         |
| $N = 4$                         | 1.0667             | 1.9368              | 0.4120 | 1.0723 | 1.8519 | 0.2145  | 0.1132  | 0.0376  |
| $N = 8$                         | 0.6857             | 0.8717              | 0.3967 | 0.6901 | 0.8663 | 0.3572  | 0.2302  | 0.0964  |
| $N = 16$                        | 0.5333             | 0.4852              | 0.3972 | 0.5426 | 0.4981 | 1.3183  | 0.4828  | 0.2758  |
| $N = 32$                        | 0.4645             | 0.3023              | 0.3936 | 0.4616 | 0.3011 | -0.6854 | 0.8316  | 0.5958  |
| $N = 64$                        | 0.4317             | 0.2002              | 0.4044 | 0.4337 | 0.2019 | 0.6886  | 0.9944  | 0.9722  |
| $N = 128$                       | 0.4157             | 0.1369              | 0.3983 | 0.4142 | 0.1346 | -0.8153 | 1.0000  | 1.0000  |
| $N = 256$                       | 0.4078             | 0.0952              | 0.3994 | 0.4071 | 0.0957 | -0.5627 | 1.0000  | 1.0000  |
| $p = 2, q = 1, V(\Sigma) = 0.6$ |                    |                     |        |        |        |         |         |         |
| $N = 4$                         | 1.2667             | 2.3068              | 0.4407 | 1.2057 | 2.1608 | -1.9958 | 0.1300  | 0.0474  |
| $N = 8$                         | 0.8857             | 1.0743              | 0.5312 | 0.8717 | 1.0467 | -0.9497 | 0.2988  | 0.1446  |
| $N = 16$                        | 0.7333             | 0.6131              | 0.5716 | 0.7383 | 0.6161 | 0.5690  | 0.6422  | 0.4196  |
| $N = 32$                        | 0.6645             | 0.3882              | 0.5839 | 0.6640 | 0.3847 | -0.1014 | 0.9538  | 0.8224  |
| $N = 64$                        | 0.6317             | 0.2594              | 0.5896 | 0.6302 | 0.2601 | -0.4312 | 0.9998  | 0.9982  |
| $N = 128$                       | 0.6157             | 0.1783              | 0.5994 | 0.6151 | 0.1753 | -0.2601 | 1.0000  | 1.0000  |
| $N = 256$                       | 0.6078             | 0.1243              | 0.5978 | 0.6063 | 0.1218 | -0.9039 | 1.0000  | 1.0000  |
| $p = 2, q = 1, V(\Sigma) = 0.8$ |                    |                     |        |        |        |         |         |         |
| $N = 4$                         | 1.4667             | 2.6522              | 0.5269 | 1.4956 | 2.9055 | 0.7042  | 0.1656  | 0.0716  |
| $N = 8$                         | 1.0857             | 1.2651              | 0.6587 | 1.0792 | 1.3030 | -0.3520 | 0.3674  | 0.1988  |
| $N = 16$                        | 0.9333             | 0.7343              | 0.7440 | 0.9364 | 0.7250 | 0.3003  | 0.7620  | 0.5484  |
| $N = 32$                        | 0.8645             | 0.4698              | 0.7732 | 0.8675 | 0.4675 | 0.4571  | 0.9878  | 0.9220  |
| $N = 64$                        | 0.8317             | 0.3157              | 0.7840 | 0.8333 | 0.3172 | 0.3574  | 1.0000  | 0.9998  |
| $N = 128$                       | 0.8157             | 0.2176              | 0.7915 | 0.8154 | 0.2182 | -0.1085 | 1.0000  | 1.0000  |
| $N = 256$                       | 0.8078             | 0.1519              | 0.7970 | 0.8111 | 0.1515 | 1.5198  | 1.0000  | 1.0000  |

(continued)

**Table S1.** (continued)

|                                 | $E[V(\mathbf{S})]$ | $SD[V(\mathbf{S})]$ | Median | Mean   | ESD    | $T$     | Pow. 5% | Pow. 1% |
|---------------------------------|--------------------|---------------------|--------|--------|--------|---------|---------|---------|
| $p = 4, q = 1, V(\Sigma) = 0.1$ |                    |                     |        |        |        |         |         |         |
| $N = 4$                         | 0.6167             | 0.7999              | 0.3641 | 0.6246 | 0.8476 | 0.6598  | 0.1002  | 0.0352  |
| $N = 8$                         | 0.3214             | 0.3225              | 0.2245 | 0.3334 | 0.3544 | 2.3979  | 0.1866  | 0.0862  |
| $N = 16$                        | 0.2033             | 0.1646              | 0.1606 | 0.2052 | 0.1617 | 0.8205  | 0.3528  | 0.1910  |
| $N = 32$                        | 0.1500             | 0.0968              | 0.1288 | 0.1513 | 0.0974 | 0.9326  | 0.6670  | 0.4546  |
| $N = 64$                        | 0.1246             | 0.0619              | 0.1130 | 0.1253 | 0.0633 | 0.7650  | 0.9492  | 0.8778  |
| $N = 128$                       | 0.1122             | 0.0415              | 0.1069 | 0.1129 | 0.0420 | 1.2435  | 0.9994  | 0.9976  |
| $N = 256$                       | 0.1061             | 0.0286              | 0.1030 | 0.1056 | 0.0284 | -1.1421 | 1.0000  | 1.0000  |
| $p = 4, q = 1, V(\Sigma) = 0.2$ |                    |                     |        |        |        |         |         |         |
| $N = 4$                         | 0.7333             | 1.0876              | 0.3700 | 0.7096 | 1.0191 | -1.6486 | 0.1308  | 0.0552  |
| $N = 8$                         | 0.4286             | 0.4692              | 0.2755 | 0.4334 | 0.4851 | 0.7103  | 0.2700  | 0.1490  |
| $N = 16$                        | 0.3067             | 0.2532              | 0.2379 | 0.3087 | 0.2541 | 0.5529  | 0.5504  | 0.3758  |
| $N = 32$                        | 0.2516             | 0.1546              | 0.2207 | 0.2512 | 0.1517 | -0.1925 | 0.8916  | 0.7652  |
| $N = 64$                        | 0.2254             | 0.1012              | 0.2085 | 0.2257 | 0.1016 | 0.1918  | 0.9976  | 0.9908  |
| $N = 128$                       | 0.2126             | 0.0688              | 0.2031 | 0.2112 | 0.0683 | -1.4846 | 1.0000  | 1.0000  |
| $N = 256$                       | 0.2063             | 0.0477              | 0.2029 | 0.2069 | 0.0478 | 0.9460  | 1.0000  | 1.0000  |
| $p = 4, q = 1, V(\Sigma) = 0.4$ |                    |                     |        |        |        |         |         |         |
| $N = 4$                         | 0.9667             | 1.6064              | 0.4096 | 0.9742 | 1.5788 | 0.3372  | 0.1936  | 0.1026  |
| $N = 8$                         | 0.6429             | 0.7343              | 0.3949 | 0.6372 | 0.7364 | -0.5426 | 0.4134  | 0.2690  |
| $N = 16$                        | 0.5133             | 0.4137              | 0.3968 | 0.5132 | 0.4183 | -0.0225 | 0.7684  | 0.6234  |
| $N = 32$                        | 0.4548             | 0.2598              | 0.3937 | 0.4544 | 0.2661 | -0.1087 | 0.9888  | 0.9584  |
| $N = 64$                        | 0.4270             | 0.1728              | 0.4025 | 0.4292 | 0.1756 | 0.8791  | 1.0000  | 0.9998  |
| $N = 128$                       | 0.4134             | 0.1185              | 0.4011 | 0.4122 | 0.1168 | -0.7078 | 1.0000  | 1.0000  |
| $N = 256$                       | 0.4067             | 0.0825              | 0.3970 | 0.4038 | 0.0806 | -2.5084 | 1.0000  | 1.0000  |
| $p = 4, q = 1, V(\Sigma) = 0.6$ |                    |                     |        |        |        |         |         |         |
| $N = 4$                         | 1.2000             | 2.0850              | 0.4763 | 1.1770 | 2.0466 | -0.7938 | 0.2426  | 0.1370  |
| $N = 8$                         | 0.8571             | 0.9812              | 0.5485 | 0.8444 | 0.9432 | -0.9582 | 0.5276  | 0.3806  |
| $N = 16$                        | 0.7200             | 0.5643              | 0.5634 | 0.7104 | 0.5573 | -1.2209 | 0.8732  | 0.7710  |
| $N = 32$                        | 0.6581             | 0.3589              | 0.5820 | 0.6539 | 0.3516 | -0.8294 | 0.9970  | 0.9882  |
| $N = 64$                        | 0.6286             | 0.2405              | 0.5917 | 0.6291 | 0.2451 | 0.1460  | 1.0000  | 1.0000  |
| $N = 128$                       | 0.6142             | 0.1655              | 0.5923 | 0.6084 | 0.1634 | -2.5079 | 1.0000  | 1.0000  |
| $N = 256$                       | 0.6071             | 0.1154              | 0.5971 | 0.6067 | 0.1175 | -0.2168 | 1.0000  | 1.0000  |
| $p = 4, q = 1, V(\Sigma) = 0.8$ |                    |                     |        |        |        |         |         |         |
| $N = 4$                         | 1.4333             | 2.5407              | 0.5520 | 1.3960 | 2.4201 | -1.0902 | 0.2744  | 0.1672  |
| $N = 8$                         | 1.0714             | 1.2182              | 0.6903 | 1.0730 | 1.2081 | 0.0917  | 0.6150  | 0.4626  |
| $N = 16$                        | 0.9267             | 0.7096              | 0.7454 | 0.9328 | 0.7139 | 0.6117  | 0.9306  | 0.8646  |
| $N = 32$                        | 0.8613             | 0.4549              | 0.7682 | 0.8585 | 0.4565 | -0.4368 | 0.9994  | 0.9978  |
| $N = 64$                        | 0.8302             | 0.3061              | 0.7903 | 0.8350 | 0.3069 | 1.1137  | 1.0000  | 1.0000  |
| $N = 128$                       | 0.8150             | 0.2111              | 0.7929 | 0.8139 | 0.2120 | -0.3642 | 1.0000  | 1.0000  |
| $N = 256$                       | 0.8075             | 0.1474              | 0.7948 | 0.8079 | 0.1470 | 0.2033  | 1.0000  | 1.0000  |

(continued)

**Table S1.** (continued)

|                                   | $E[V(\mathbf{S})]$ | $SD[V(\mathbf{S})]$ | Median | Mean   | ESD    | $T$     | Pow. 5% | Pow. 1% |
|-----------------------------------|--------------------|---------------------|--------|--------|--------|---------|---------|---------|
| $p = 4, q = 2, V(\Sigma) = 0.1$   |                    |                     |        |        |        |         |         |         |
| $N = 4$                           | 0.6167             | 0.7295              | 0.3864 | 0.6220 | 0.7469 | 0.5028  | 0.0982  | 0.0316  |
| $N = 8$                           | 0.3214             | 0.2772              | 0.2483 | 0.3227 | 0.2693 | 0.3344  | 0.1798  | 0.0652  |
| $N = 16$                          | 0.2033             | 0.1318              | 0.1731 | 0.2031 | 0.1311 | -0.1489 | 0.3632  | 0.1676  |
| $N = 32$                          | 0.1500             | 0.0725              | 0.1380 | 0.1510 | 0.0723 | 1.0047  | 0.7642  | 0.4980  |
| $N = 64$                          | 0.1246             | 0.0441              | 0.1186 | 0.1251 | 0.0455 | 0.7961  | 0.9920  | 0.9602  |
| $N = 128$                         | 0.1122             | 0.0286              | 0.1099 | 0.1127 | 0.0288 | 1.1330  | 1.0000  | 1.0000  |
| $N = 256$                         | 0.1061             | 0.0193              | 0.1041 | 0.1054 | 0.0193 | -2.5193 | 1.0000  | 1.0000  |
| $p = 4, q = 2, V(\Sigma) = 0.2$   |                    |                     |        |        |        |         |         |         |
| $N = 4$                           | 0.7333             | 0.9288              | 0.4256 | 0.7380 | 0.9311 | 0.3541  | 0.1418  | 0.0488  |
| $N = 8$                           | 0.4286             | 0.3717              | 0.3198 | 0.4179 | 0.3578 | -2.1073 | 0.2826  | 0.1270  |
| $N = 16$                          | 0.3067             | 0.1855              | 0.2651 | 0.3085 | 0.1873 | 0.7019  | 0.6378  | 0.3982  |
| $N = 32$                          | 0.2516             | 0.1061              | 0.2384 | 0.2556 | 0.1084 | 2.6090  | 0.9726  | 0.8884  |
| $N = 64$                          | 0.2254             | 0.0664              | 0.2173 | 0.2260 | 0.0666 | 0.6088  | 1.0000  | 1.0000  |
| $N = 128$                         | 0.2126             | 0.0439              | 0.2088 | 0.2128 | 0.0453 | 0.3361  | 1.0000  | 1.0000  |
| $N = 256$                         | 0.2063             | 0.0300              | 0.2050 | 0.2064 | 0.0300 | 0.3695  | 1.0000  | 1.0000  |
| $p = 4, q = 2, V(\Sigma) = 0.4$   |                    |                     |        |        |        |         |         |         |
| (This conformation is impossible) |                    |                     |        |        |        |         |         |         |

(continued)

**Table S1.** (continued)

|                                 | $E[V(\mathbf{S})]$ | $SD[V(\mathbf{S})]$ | Median | Mean   | ESD    | $T$     | Pow. 5% | Pow. 1% |
|---------------------------------|--------------------|---------------------|--------|--------|--------|---------|---------|---------|
| $p = 8, q = 1, V(\Sigma) = 0.1$ |                    |                     |        |        |        |         |         |         |
| $N = 4$                         | 0.5417             | 0.5946              | 0.3545 | 0.5388 | 0.6115 | -0.3270 | 0.1390  | 0.0752  |
| $N = 8$                         | 0.2893             | 0.2455              | 0.2127 | 0.2849 | 0.2393 | -1.3039 | 0.2810  | 0.1660  |
| $N = 16$                        | 0.1883             | 0.1281              | 0.1522 | 0.1860 | 0.1272 | -1.2985 | 0.5616  | 0.4194  |
| $N = 32$                        | 0.1427             | 0.0766              | 0.1271 | 0.1425 | 0.0758 | -0.2525 | 0.9044  | 0.8270  |
| $N = 64$                        | 0.1210             | 0.0495              | 0.1122 | 0.1213 | 0.0498 | 0.3606  | 0.9984  | 0.9950  |
| $N = 128$                       | 0.1104             | 0.0334              | 0.1061 | 0.1098 | 0.0333 | -1.3971 | 1.0000  | 1.0000  |
| $N = 256$                       | 0.1052             | 0.0231              | 0.1030 | 0.1054 | 0.0236 | 0.5513  | 1.0000  | 1.0000  |
| $p = 8, q = 1, V(\Sigma) = 0.2$ |                    |                     |        |        |        |         |         |         |
| $N = 4$                         | 0.6667             | 0.8974              | 0.3775 | 0.6835 | 0.9034 | 1.3184  | 0.2118  | 0.1336  |
| $N = 8$                         | 0.4000             | 0.3948              | 0.2819 | 0.4013 | 0.3782 | 0.2518  | 0.4278  | 0.3112  |
| $N = 16$                        | 0.2933             | 0.2163              | 0.2323 | 0.2891 | 0.2124 | -1.4124 | 0.7642  | 0.6644  |
| $N = 32$                        | 0.2452             | 0.1335              | 0.2173 | 0.2469 | 0.1372 | 0.8894  | 0.9836  | 0.9652  |
| $N = 64$                        | 0.2222             | 0.0880              | 0.2090 | 0.2224 | 0.0903 | 0.1113  | 1.0000  | 0.9998  |
| $N = 128$                       | 0.2110             | 0.0600              | 0.2055 | 0.2122 | 0.0592 | 1.3676  | 1.0000  | 1.0000  |
| $N = 256$                       | 0.2055             | 0.0416              | 0.2026 | 0.2054 | 0.0417 | -0.1800 | 1.0000  | 1.0000  |
| $p = 8, q = 1, V(\Sigma) = 0.4$ |                    |                     |        |        |        |         |         |         |
| $N = 4$                         | 0.9167             | 1.4545              | 0.4073 | 0.8964 | 1.3932 | -1.0283 | 0.2758  | 0.2010  |
| $N = 8$                         | 0.6214             | 0.6726              | 0.3993 | 0.6180 | 0.6724 | -0.3572 | 0.5748  | 0.4674  |
| $N = 16$                        | 0.5033             | 0.3821              | 0.3975 | 0.5043 | 0.3798 | 0.1820  | 0.9124  | 0.8712  |
| $N = 32$                        | 0.4500             | 0.2412              | 0.4025 | 0.4510 | 0.2414 | 0.2901  | 0.9990  | 0.9964  |
| $N = 64$                        | 0.4246             | 0.1610              | 0.4031 | 0.4243 | 0.1586 | -0.1199 | 1.0000  | 1.0000  |
| $N = 128$                       | 0.4122             | 0.1105              | 0.3995 | 0.4130 | 0.1108 | 0.5315  | 1.0000  | 1.0000  |
| $N = 256$                       | 0.4061             | 0.0770              | 0.3993 | 0.4053 | 0.0762 | -0.7337 | 1.0000  | 1.0000  |
| $p = 8, q = 1, V(\Sigma) = 0.6$ |                    |                     |        |        |        |         |         |         |
| $N = 4$                         | 1.1667             | 1.9793              | 0.4641 | 1.1773 | 2.0289 | 0.3698  | 0.3310  | 0.2544  |
| $N = 8$                         | 0.8429             | 0.9374              | 0.5468 | 0.8327 | 0.9047 | -0.7964 | 0.6726  | 0.5776  |
| $N = 16$                        | 0.7133             | 0.5415              | 0.5891 | 0.7236 | 0.5308 | 1.3632  | 0.9568  | 0.9324  |
| $N = 32$                        | 0.6548             | 0.3454              | 0.5764 | 0.6494 | 0.3566 | -1.0725 | 0.9998  | 0.9988  |
| $N = 64$                        | 0.6270             | 0.2318              | 0.5906 | 0.6254 | 0.2324 | -0.4722 | 1.0000  | 1.0000  |
| $N = 128$                       | 0.6134             | 0.1596              | 0.5988 | 0.6135 | 0.1565 | 0.0522  | 1.0000  | 1.0000  |
| $N = 256$                       | 0.6067             | 0.1114              | 0.5957 | 0.6051 | 0.1106 | -0.9916 | 1.0000  | 1.0000  |
| $p = 8, q = 1, V(\Sigma) = 0.8$ |                    |                     |        |        |        |         |         |         |
| $N = 4$                         | 1.4167             | 2.4862              | 0.5572 | 1.4707 | 2.7285 | 1.3993  | 0.3852  | 0.3018  |
| $N = 8$                         | 1.0643             | 1.1954              | 0.6913 | 1.0524 | 1.1663 | -0.7186 | 0.7356  | 0.6420  |
| $N = 16$                        | 0.9233             | 0.6977              | 0.7348 | 0.9074 | 0.6883 | -1.6414 | 0.9750  | 0.9562  |
| $N = 32$                        | 0.8597             | 0.4477              | 0.7714 | 0.8582 | 0.4380 | -0.2392 | 1.0000  | 1.0000  |
| $N = 64$                        | 0.8294             | 0.3015              | 0.7840 | 0.8222 | 0.2990 | -1.6841 | 1.0000  | 1.0000  |
| $N = 128$                       | 0.8146             | 0.2080              | 0.7942 | 0.8167 | 0.2067 | 0.7183  | 1.0000  | 1.0000  |
| $N = 256$                       | 0.8073             | 0.1453              | 0.7949 | 0.8054 | 0.1443 | -0.9026 | 1.0000  | 1.0000  |

(continued)

**Table S1.** (continued)

|                                 | $E[V(\mathbf{S})]$ | $SD[V(\mathbf{S})]$ | Median | Mean   | ESD    | $T$     | Pow. 5% | Pow. 1% |
|---------------------------------|--------------------|---------------------|--------|--------|--------|---------|---------|---------|
| $p = 8, q = 2, V(\Sigma) = 0.1$ |                    |                     |        |        |        |         |         |         |
| $N = 4$                         | 0.5417             | 0.5297              | 0.3831 | 0.5358 | 0.5142 | -0.8102 | 0.1444  | 0.0754  |
| $N = 8$                         | 0.2893             | 0.2070              | 0.2363 | 0.2909 | 0.2077 | 0.5498  | 0.3160  | 0.1700  |
| $N = 16$                        | 0.1883             | 0.1021              | 0.1667 | 0.1870 | 0.0997 | -0.9397 | 0.6386  | 0.4742  |
| $N = 32$                        | 0.1427             | 0.0583              | 0.1334 | 0.1435 | 0.0597 | 0.9048  | 0.9594  | 0.9088  |
| $N = 64$                        | 0.1210             | 0.0365              | 0.1158 | 0.1195 | 0.0358 | -2.9783 | 0.9998  | 0.9990  |
| $N = 128$                       | 0.1104             | 0.0242              | 0.1089 | 0.1106 | 0.0242 | 0.4686  | 1.0000  | 1.0000  |
| $N = 256$                       | 0.1052             | 0.0165              | 0.1044 | 0.1052 | 0.0164 | 0.0586  | 1.0000  | 1.0000  |
| $p = 8, q = 2, V(\Sigma) = 0.2$ |                    |                     |        |        |        |         |         |         |
| $N = 4$                         | 0.6667             | 0.7567              | 0.4338 | 0.6849 | 0.7664 | 1.6786  | 0.2248  | 0.1390  |
| $N = 8$                         | 0.4000             | 0.3138              | 0.3126 | 0.3976 | 0.3228 | -0.5188 | 0.4742  | 0.3170  |
| $N = 16$                        | 0.2933             | 0.1629              | 0.2554 | 0.2901 | 0.1616 | -1.4358 | 0.8592  | 0.7680  |
| $N = 32$                        | 0.2452             | 0.0966              | 0.2299 | 0.2446 | 0.0962 | -0.3991 | 0.9990  | 0.9944  |
| $N = 64$                        | 0.2222             | 0.0620              | 0.2144 | 0.2215 | 0.0629 | -0.8630 | 1.0000  | 1.0000  |
| $N = 128$                       | 0.2110             | 0.0417              | 0.2077 | 0.2108 | 0.0413 | -0.3914 | 1.0000  | 1.0000  |
| $N = 256$                       | 0.2055             | 0.0287              | 0.2044 | 0.2057 | 0.0284 | 0.5480  | 1.0000  | 1.0000  |
| $p = 8, q = 2, V(\Sigma) = 0.4$ |                    |                     |        |        |        |         |         |         |
| $N = 4$                         | 0.9167             | 1.1622              | 0.5207 | 0.9034 | 1.1518 | -0.8149 | 0.3152  | 0.2154  |
| $N = 8$                         | 0.6214             | 0.5071              | 0.4870 | 0.6244 | 0.5230 | 0.4001  | 0.6742  | 0.5432  |
| $N = 16$                        | 0.5033             | 0.2744              | 0.4443 | 0.5015 | 0.2685 | -0.4783 | 0.9794  | 0.9514  |
| $N = 32$                        | 0.4500             | 0.1675              | 0.4209 | 0.4491 | 0.1695 | -0.3959 | 0.9998  | 0.9998  |
| $N = 64$                        | 0.4246             | 0.1095              | 0.4105 | 0.4212 | 0.1079 | -2.2123 | 1.0000  | 1.0000  |
| $N = 128$                       | 0.4122             | 0.0744              | 0.4086 | 0.4131 | 0.0736 | 0.8143  | 1.0000  | 1.0000  |
| $N = 256$                       | 0.4061             | 0.0515              | 0.4028 | 0.4054 | 0.0514 | -0.9666 | 1.0000  | 1.0000  |
| $p = 8, q = 4, V(\Sigma) = 0.1$ |                    |                     |        |        |        |         |         |         |
| $N = 4$                         | 0.5417             | 0.4697              | 0.4193 | 0.5603 | 0.4833 | 2.7253  | 0.1542  | 0.0784  |
| $N = 8$                         | 0.2893             | 0.1721              | 0.2525 | 0.2901 | 0.1715 | 0.3491  | 0.3180  | 0.1606  |
| $N = 16$                        | 0.1883             | 0.0787              | 0.1754 | 0.1887 | 0.0785 | 0.3747  | 0.7164  | 0.5158  |
| $N = 32$                        | 0.1427             | 0.0417              | 0.1381 | 0.1435 | 0.0423 | 1.2407  | 0.9950  | 0.9750  |
| $N = 64$                        | 0.1210             | 0.0245              | 0.1193 | 0.1215 | 0.0246 | 1.2929  | 1.0000  | 1.0000  |
| $N = 128$                       | 0.1104             | 0.0156              | 0.1098 | 0.1107 | 0.0155 | 1.2881  | 1.0000  | 1.0000  |
| $N = 256$                       | 0.1052             | 0.0104              | 0.1046 | 0.1049 | 0.0103 | -1.9227 | 1.0000  | 1.0000  |

$p = 8, q = 4, V(\Sigma) = 0.2$

(This conformation is impossible)

(continued)

**Table S1.** (continued)

|                                  | $E[V(\mathbf{S})]$ | $SD[V(\mathbf{S})]$ | Median | Mean   | ESD    | $T$     | Pow. 5% | Pow. 1% |
|----------------------------------|--------------------|---------------------|--------|--------|--------|---------|---------|---------|
| $p = 16, q = 1, V(\Sigma) = 0.1$ |                    |                     |        |        |        |         |         |         |
| $N = 4$                          | 0.5042             | 0.4994              | 0.3516 | 0.5085 | 0.5040 | 0.6104  | 0.2026  | 0.1218  |
| $N = 8$                          | 0.2732             | 0.2102              | 0.2165 | 0.2773 | 0.2092 | 1.3950  | 0.4158  | 0.3142  |
| $N = 16$                         | 0.1808             | 0.1114              | 0.1518 | 0.1799 | 0.1115 | -0.6051 | 0.7332  | 0.6342  |
| $N = 32$                         | 0.1391             | 0.0673              | 0.1257 | 0.1393 | 0.0685 | 0.1796  | 0.9782  | 0.9564  |
| $N = 64$                         | 0.1192             | 0.0438              | 0.1121 | 0.1196 | 0.0443 | 0.5738  | 0.9998  | 0.9998  |
| $N = 128$                        | 0.1095             | 0.0297              | 0.1063 | 0.1097 | 0.0302 | 0.3760  | 1.0000  | 1.0000  |
| $N = 256$                        | 0.1048             | 0.0205              | 0.1034 | 0.1048 | 0.0205 | 0.3061  | 1.0000  | 1.0000  |
| $p = 16, q = 1, V(\Sigma) = 0.2$ |                    |                     |        |        |        |         |         |         |
| $N = 4$                          | 0.6333             | 0.8077              | 0.3713 | 0.6342 | 0.8024 | 0.0729  | 0.2688  | 0.1880  |
| $N = 8$                          | 0.3857             | 0.3598              | 0.2756 | 0.3878 | 0.3671 | 0.3950  | 0.5466  | 0.4586  |
| $N = 16$                         | 0.2867             | 0.1990              | 0.2375 | 0.2847 | 0.1933 | -0.7042 | 0.8770  | 0.8272  |
| $N = 32$                         | 0.2419             | 0.1235              | 0.2168 | 0.2395 | 0.1226 | -1.3960 | 0.9970  | 0.9930  |
| $N = 64$                         | 0.2206             | 0.0817              | 0.2092 | 0.2206 | 0.0817 | -0.0454 | 1.0000  | 1.0000  |
| $N = 128$                        | 0.2102             | 0.0558              | 0.2030 | 0.2087 | 0.0554 | -1.9179 | 1.0000  | 1.0000  |
| $N = 256$                        | 0.2051             | 0.0388              | 0.2015 | 0.2050 | 0.0385 | -0.1718 | 1.0000  | 1.0000  |
| $p = 16, q = 1, V(\Sigma) = 0.4$ |                    |                     |        |        |        |         |         |         |
| $N = 4$                          | 0.8917             | 1.3811              | 0.4263 | 0.8759 | 1.2652 | -0.8801 | 0.3518  | 0.2774  |
| $N = 8$                          | 0.6107             | 0.6427              | 0.4130 | 0.6165 | 0.6509 | 0.6282  | 0.6822  | 0.6172  |
| $N = 16$                         | 0.4983             | 0.3668              | 0.4060 | 0.5036 | 0.3748 | 0.9922  | 0.9542  | 0.9330  |
| $N = 32$                         | 0.4476             | 0.2322              | 0.4057 | 0.4492 | 0.2314 | 0.5001  | 0.9998  | 0.9994  |
| $N = 64$                         | 0.4234             | 0.1552              | 0.4005 | 0.4227 | 0.1546 | -0.3205 | 1.0000  | 1.0000  |
| $N = 128$                        | 0.4116             | 0.1067              | 0.4036 | 0.4144 | 0.1082 | 1.8203  | 1.0000  | 1.0000  |
| $N = 256$                        | 0.4058             | 0.0743              | 0.4000 | 0.4056 | 0.0753 | -0.2074 | 1.0000  | 1.0000  |
| $p = 16, q = 1, V(\Sigma) = 0.6$ |                    |                     |        |        |        |         |         |         |
| $N = 4$                          | 1.1500             | 1.9274              | 0.4797 | 1.1959 | 2.0814 | 1.5607  | 0.4140  | 0.3374  |
| $N = 8$                          | 0.8357             | 0.9159              | 0.5480 | 0.8416 | 0.9194 | 0.4545  | 0.7496  | 0.7020  |
| $N = 16$                         | 0.7100             | 0.5304              | 0.5720 | 0.7164 | 0.5430 | 0.8347  | 0.9762  | 0.9668  |
| $N = 32$                         | 0.6532             | 0.3388              | 0.5914 | 0.6559 | 0.3432 | 0.5582  | 1.0000  | 1.0000  |
| $N = 64$                         | 0.6262             | 0.2275              | 0.5929 | 0.6268 | 0.2284 | 0.1861  | 1.0000  | 1.0000  |
| $N = 128$                        | 0.6130             | 0.1568              | 0.6006 | 0.6158 | 0.1603 | 1.2290  | 1.0000  | 1.0000  |
| $N = 256$                        | 0.6065             | 0.1094              | 0.5974 | 0.6048 | 0.1087 | -1.0764 | 1.0000  | 1.0000  |
| $p = 16, q = 1, V(\Sigma) = 0.8$ |                    |                     |        |        |        |         |         |         |
| $N = 4$                          | 1.4083             | 2.4591              | 0.5328 | 1.3669 | 2.3491 | -1.2462 | 0.4438  | 0.3742  |
| $N = 8$                          | 1.0607             | 1.1840              | 0.6778 | 1.0687 | 1.1804 | 0.4765  | 0.8080  | 0.7666  |
| $N = 16$                         | 0.9217             | 0.6917              | 0.7517 | 0.9147 | 0.6842 | -0.7221 | 0.9876  | 0.9814  |
| $N = 32$                         | 0.8589             | 0.4442              | 0.7847 | 0.8683 | 0.4387 | 1.5248  | 1.0000  | 1.0000  |
| $N = 64$                         | 0.8290             | 0.2992              | 0.7925 | 0.8358 | 0.3067 | 1.5855  | 1.0000  | 1.0000  |
| $N = 128$                        | 0.8144             | 0.2065              | 0.7840 | 0.8075 | 0.2054 | -2.3764 | 1.0000  | 1.0000  |
| $N = 256$                        | 0.8072             | 0.1442              | 0.7955 | 0.8072 | 0.1452 | 0.0030  | 1.0000  | 1.0000  |

(continued)



**Table S1.** (continued)

|                                  | $E[V(\mathbf{S})]$ | $SD[V(\mathbf{S})]$ | Median | Mean   | ESD    | $T$     | Pow. 5% | Pow. 1% |
|----------------------------------|--------------------|---------------------|--------|--------|--------|---------|---------|---------|
| $p = 16, q = 2, V(\Sigma) = 0.1$ |                    |                     |        |        |        |         |         |         |
| $N = 4$                          | 0.5042             | 0.4346              | 0.3721 | 0.4893 | 0.4066 | -2.5905 | 0.2082  | 0.1128  |
| $N = 8$                          | 0.2732             | 0.1733              | 0.2255 | 0.2702 | 0.1699 | -1.2467 | 0.4370  | 0.3182  |
| $N = 16$                         | 0.1808             | 0.0874              | 0.1631 | 0.1813 | 0.0871 | 0.3576  | 0.8220  | 0.7294  |
| $N = 32$                         | 0.1391             | 0.0508              | 0.1323 | 0.1398 | 0.0516 | 0.9766  | 0.9976  | 0.9928  |
| $N = 64$                         | 0.1192             | 0.0322              | 0.1162 | 0.1195 | 0.0325 | 0.5145  | 1.0000  | 1.0000  |
| $N = 128$                        | 0.1095             | 0.0215              | 0.1078 | 0.1091 | 0.0214 | -1.3660 | 1.0000  | 1.0000  |
| $N = 256$                        | 0.1048             | 0.0148              | 0.1036 | 0.1045 | 0.0148 | -1.3745 | 1.0000  | 1.0000  |
| $p = 16, q = 2, V(\Sigma) = 0.2$ |                    |                     |        |        |        |         |         |         |
| $N = 4$                          | 0.6333             | 0.6717              | 0.4132 | 0.6307 | 0.6606 | -0.2827 | 0.3020  | 0.2034  |
| $N = 8$                          | 0.3857             | 0.2838              | 0.3111 | 0.3877 | 0.2868 | 0.4978  | 0.6306  | 0.5186  |
| $N = 16$                         | 0.2867             | 0.1500              | 0.2536 | 0.2841 | 0.1491 | -1.2343 | 0.9478  | 0.9116  |
| $N = 32$                         | 0.2419             | 0.0902              | 0.2291 | 0.2414 | 0.0899 | -0.4062 | 0.9998  | 0.9994  |
| $N = 64$                         | 0.2206             | 0.0585              | 0.2120 | 0.2185 | 0.0582 | -2.6399 | 1.0000  | 1.0000  |
| $N = 128$                        | 0.2102             | 0.0395              | 0.2068 | 0.2095 | 0.0396 | -1.3000 | 1.0000  | 1.0000  |
| $N = 256$                        | 0.2051             | 0.0273              | 0.2042 | 0.2057 | 0.0265 | 1.5602  | 1.0000  | 1.0000  |
| $p = 16, q = 2, V(\Sigma) = 0.4$ |                    |                     |        |        |        |         |         |         |
| $N = 4$                          | 0.8917             | 1.1035              | 0.5242 | 0.8854 | 1.0836 | -0.4089 | 0.4082  | 0.3040  |
| $N = 8$                          | 0.6107             | 0.4889              | 0.4676 | 0.6002 | 0.4853 | -1.5280 | 0.7828  | 0.7114  |
| $N = 16$                         | 0.4983             | 0.2682              | 0.4488 | 0.5020 | 0.2713 | 0.9563  | 0.9924  | 0.9860  |
| $N = 32$                         | 0.4476             | 0.1654              | 0.4249 | 0.4473 | 0.1616 | -0.1307 | 1.0000  | 1.0000  |
| $N = 64$                         | 0.4234             | 0.1089              | 0.4093 | 0.4237 | 0.1108 | 0.1666  | 1.0000  | 1.0000  |
| $N = 128$                        | 0.4116             | 0.0742              | 0.4045 | 0.4114 | 0.0739 | -0.2290 | 1.0000  | 1.0000  |
| $N = 256$                        | 0.4058             | 0.0515              | 0.4017 | 0.4057 | 0.0523 | -0.1365 | 1.0000  | 1.0000  |
| $p = 16, q = 4, V(\Sigma) = 0.1$ |                    |                     |        |        |        |         |         |         |
| $N = 4$                          | 0.5042             | 0.3844              | 0.4028 | 0.5101 | 0.3902 | 1.0802  | 0.2238  | 0.1162  |
| $N = 8$                          | 0.2732             | 0.1449              | 0.2417 | 0.2711 | 0.1416 | -1.0800 | 0.4776  | 0.3316  |
| $N = 16$                         | 0.1808             | 0.0688              | 0.1713 | 0.1819 | 0.0702 | 1.1022  | 0.8972  | 0.7998  |
| $N = 32$                         | 0.1391             | 0.0379              | 0.1335 | 0.1376 | 0.0372 | -2.8589 | 0.9998  | 0.9986  |
| $N = 64$                         | 0.1192             | 0.0232              | 0.1172 | 0.1190 | 0.0229 | -0.8179 | 1.0000  | 1.0000  |
| $N = 128$                        | 0.1095             | 0.0151              | 0.1089 | 0.1097 | 0.0151 | 0.7823  | 1.0000  | 1.0000  |
| $N = 256$                        | 0.1048             | 0.0102              | 0.1041 | 0.1047 | 0.0101 | -0.5139 | 1.0000  | 1.0000  |
| $p = 16, q = 4, V(\Sigma) = 0.2$ |                    |                     |        |        |        |         |         |         |
| $N = 4$                          | 0.6333             | 0.5660              | 0.4525 | 0.6217 | 0.5592 | -1.4728 | 0.3164  | 0.2102  |
| $N = 8$                          | 0.3857             | 0.2250              | 0.3395 | 0.3867 | 0.2277 | 0.3213  | 0.6996  | 0.5818  |
| $N = 16$                         | 0.2867             | 0.1122              | 0.2670 | 0.2853 | 0.1118 | -0.8900 | 0.9872  | 0.9702  |
| $N = 32$                         | 0.2419             | 0.0644              | 0.2345 | 0.2422 | 0.0650 | 0.2472  | 1.0000  | 1.0000  |
| $N = 64$                         | 0.2206             | 0.0404              | 0.2167 | 0.2201 | 0.0406 | -1.0141 | 1.0000  | 1.0000  |
| $N = 128$                        | 0.2102             | 0.0268              | 0.2086 | 0.2103 | 0.0266 | 0.0662  | 1.0000  | 1.0000  |
| $N = 256$                        | 0.2051             | 0.0183              | 0.2042 | 0.2045 | 0.0179 | -2.2267 | 1.0000  | 1.0000  |

(continued)

**Table S1.** (continued)

|                                  | $E[V(\mathbf{S})]$ | $SD[V(\mathbf{S})]$ | Median | Mean   | ESD    | $T$     | Pow. 5% | Pow. 1% |
|----------------------------------|--------------------|---------------------|--------|--------|--------|---------|---------|---------|
| $p = 32, q = 1, V(\Sigma) = 0.1$ |                    |                     |        |        |        |         |         |         |
| $N = 4$                          | 0.4854             | 0.4534              | 0.3382 | 0.4789 | 0.4380 | -1.0575 | 0.2604  | 0.1900  |
| $N = 8$                          | 0.2652             | 0.1932              | 0.2038 | 0.2590 | 0.1893 | -2.3033 | 0.4940  | 0.4178  |
| $N = 16$                         | 0.1771             | 0.1033              | 0.1546 | 0.1794 | 0.1038 | 1.5962  | 0.8460  | 0.8034  |
| $N = 32$                         | 0.1373             | 0.0628              | 0.1262 | 0.1378 | 0.0615 | 0.6141  | 0.9940  | 0.9912  |
| $N = 64$                         | 0.1184             | 0.0410              | 0.1127 | 0.1186 | 0.0411 | 0.4012  | 1.0000  | 1.0000  |
| $N = 128$                        | 0.1091             | 0.0278              | 0.1060 | 0.1082 | 0.0278 | -2.1710 | 1.0000  | 1.0000  |
| $N = 256$                        | 0.1045             | 0.0193              | 0.1025 | 0.1040 | 0.0189 | -2.1023 | 1.0000  | 1.0000  |
| $p = 32, q = 1, V(\Sigma) = 0.2$ |                    |                     |        |        |        |         |         |         |
| $N = 4$                          | 0.6167             | 0.7641              | 0.3490 | 0.5908 | 0.7234 | -2.5279 | 0.3270  | 0.2640  |
| $N = 8$                          | 0.3786             | 0.3427              | 0.2744 | 0.3799 | 0.3437 | 0.2828  | 0.6380  | 0.5822  |
| $N = 16$                         | 0.2833             | 0.1905              | 0.2312 | 0.2778 | 0.1862 | -2.1149 | 0.9294  | 0.9080  |
| $N = 32$                         | 0.2403             | 0.1186              | 0.2181 | 0.2423 | 0.1215 | 1.1513  | 0.9994  | 0.9980  |
| $N = 64$                         | 0.2198             | 0.0786              | 0.2093 | 0.2206 | 0.0778 | 0.6652  | 1.0000  | 1.0000  |
| $N = 128$                        | 0.2098             | 0.0537              | 0.2050 | 0.2107 | 0.0533 | 1.1501  | 1.0000  | 1.0000  |
| $N = 256$                        | 0.2049             | 0.0374              | 0.2027 | 0.2053 | 0.0369 | 0.6690  | 1.0000  | 1.0000  |
| $p = 32, q = 1, V(\Sigma) = 0.4$ |                    |                     |        |        |        |         |         |         |
| $N = 4$                          | 0.8792             | 1.3449              | 0.4175 | 0.8790 | 1.3001 | -0.0111 | 0.4194  | 0.3640  |
| $N = 8$                          | 0.6054             | 0.6280              | 0.4080 | 0.5999 | 0.6307 | -0.6167 | 0.7424  | 0.7020  |
| $N = 16$                         | 0.4958             | 0.3592              | 0.4030 | 0.4931 | 0.3599 | -0.5428 | 0.9756  | 0.9694  |
| $N = 32$                         | 0.4464             | 0.2278              | 0.4061 | 0.4517 | 0.2342 | 1.6000  | 0.9998  | 0.9996  |
| $N = 64$                         | 0.4228             | 0.1523              | 0.4014 | 0.4228 | 0.1509 | -0.0001 | 1.0000  | 1.0000  |
| $N = 128$                        | 0.4113             | 0.1047              | 0.4027 | 0.4142 | 0.1061 | 1.9386  | 1.0000  | 1.0000  |
| $N = 256$                        | 0.4056             | 0.0730              | 0.3990 | 0.4049 | 0.0720 | -0.7666 | 1.0000  | 1.0000  |
| $p = 32, q = 1, V(\Sigma) = 0.6$ |                    |                     |        |        |        |         |         |         |
| $N = 4$                          | 1.1417             | 1.9016              | 0.4839 | 1.1495 | 1.8884 | 0.2917  | 0.4702  | 0.4220  |
| $N = 8$                          | 0.8321             | 0.9053              | 0.5361 | 0.8252 | 0.8771 | -0.5637 | 0.8144  | 0.7848  |
| $N = 16$                         | 0.7083             | 0.5248              | 0.5752 | 0.7099 | 0.5382 | 0.2084  | 0.9886  | 0.9850  |
| $N = 32$                         | 0.6524             | 0.3355              | 0.5899 | 0.6548 | 0.3395 | 0.4951  | 1.0000  | 1.0000  |
| $N = 64$                         | 0.6258             | 0.2254              | 0.5960 | 0.6286 | 0.2259 | 0.8767  | 1.0000  | 1.0000  |
| $N = 128$                        | 0.6128             | 0.1553              | 0.5927 | 0.6096 | 0.1548 | -1.4599 | 1.0000  | 1.0000  |
| $N = 256$                        | 0.6064             | 0.1084              | 0.5992 | 0.6061 | 0.1086 | -0.1815 | 1.0000  | 1.0000  |
| $p = 32, q = 1, V(\Sigma) = 0.8$ |                    |                     |        |        |        |         |         |         |
| $N = 4$                          | 1.4042             | 2.4456              | 0.5315 | 1.3706 | 2.3694 | -1.0015 | 0.4940  | 0.4506  |
| $N = 8$                          | 1.0589             | 1.1784              | 0.6869 | 1.0663 | 1.1907 | 0.4355  | 0.8458  | 0.8238  |
| $N = 16$                         | 0.9208             | 0.6888              | 0.7275 | 0.9046 | 0.6664 | -1.7216 | 0.9912  | 0.9894  |
| $N = 32$                         | 0.8585             | 0.4424              | 0.7738 | 0.8625 | 0.4476 | 0.6339  | 1.0000  | 1.0000  |
| $N = 64$                         | 0.8288             | 0.2981              | 0.7822 | 0.8223 | 0.2880 | -1.5782 | 1.0000  | 1.0000  |
| $N = 128$                        | 0.8143             | 0.2057              | 0.7978 | 0.8180 | 0.2054 | 1.2902  | 1.0000  | 1.0000  |
| $N = 256$                        | 0.8071             | 0.1437              | 0.7946 | 0.8046 | 0.1438 | -1.2523 | 1.0000  | 1.0000  |

(continued)

**Table S1.** (continued)

|                                  | $E[V(\mathbf{S})]$ | $SD[V(\mathbf{S})]$ | Median | Mean   | ESD    | $T$     | Pow. 5% | Pow. 1% |
|----------------------------------|--------------------|---------------------|--------|--------|--------|---------|---------|---------|
| $p = 32, q = 2, V(\Sigma) = 0.1$ |                    |                     |        |        |        |         |         |         |
| $N = 4$                          | 0.4854             | 0.3879              | 0.3699 | 0.4765 | 0.3649 | -1.7243 | 0.2934  | 0.2140  |
| $N = 8$                          | 0.2652             | 0.1567              | 0.2254 | 0.2620 | 0.1560 | -1.4249 | 0.5638  | 0.4812  |
| $N = 16$                         | 0.1771             | 0.0800              | 0.1596 | 0.1752 | 0.0797 | -1.6907 | 0.9106  | 0.8708  |
| $N = 32$                         | 0.1373             | 0.0469              | 0.1300 | 0.1365 | 0.0469 | -1.1689 | 0.9994  | 0.9986  |
| $N = 64$                         | 0.1184             | 0.0300              | 0.1151 | 0.1183 | 0.0298 | -0.1368 | 1.0000  | 1.0000  |
| $N = 128$                        | 0.1091             | 0.0201              | 0.1071 | 0.1089 | 0.0200 | -0.6488 | 1.0000  | 1.0000  |
| $N = 256$                        | 0.1045             | 0.0138              | 0.1043 | 0.1048 | 0.0138 | 1.3050  | 1.0000  | 1.0000  |
| $p = 32, q = 2, V(\Sigma) = 0.2$ |                    |                     |        |        |        |         |         |         |
| $N = 4$                          | 0.6167             | 0.6296              | 0.4145 | 0.6196 | 0.6367 | 0.3310  | 0.3856  | 0.3140  |
| $N = 8$                          | 0.3786             | 0.2686              | 0.3172 | 0.3827 | 0.2633 | 1.1072  | 0.7300  | 0.6708  |
| $N = 16$                         | 0.2833             | 0.1433              | 0.2560 | 0.2838 | 0.1414 | 0.2470  | 0.9806  | 0.9714  |
| $N = 32$                         | 0.2403             | 0.0867              | 0.2278 | 0.2410 | 0.0876 | 0.5138  | 1.0000  | 1.0000  |
| $N = 64$                         | 0.2198             | 0.0565              | 0.2149 | 0.2211 | 0.0577 | 1.5370  | 1.0000  | 1.0000  |
| $N = 128$                        | 0.2098             | 0.0382              | 0.2064 | 0.2095 | 0.0381 | -0.5589 | 1.0000  | 1.0000  |
| $N = 256$                        | 0.2049             | 0.0265              | 0.2032 | 0.2047 | 0.0261 | -0.4954 | 1.0000  | 1.0000  |
| $p = 32, q = 2, V(\Sigma) = 0.4$ |                    |                     |        |        |        |         |         |         |
| $N = 4$                          | 0.8792             | 1.0734              | 0.5075 | 0.8708 | 1.0767 | -0.5475 | 0.4758  | 0.4150  |
| $N = 8$                          | 0.6054             | 0.4790              | 0.4807 | 0.6065 | 0.4766 | 0.1723  | 0.8488  | 0.8144  |
| $N = 16$                         | 0.4958             | 0.2645              | 0.4407 | 0.4946 | 0.2639 | -0.3404 | 0.9966  | 0.9944  |
| $N = 32$                         | 0.4464             | 0.1638              | 0.4192 | 0.4468 | 0.1675 | 0.1846  | 1.0000  | 1.0000  |
| $N = 64$                         | 0.4228             | 0.1081              | 0.4109 | 0.4226 | 0.1077 | -0.1262 | 1.0000  | 1.0000  |
| $N = 128$                        | 0.4113             | 0.0738              | 0.4060 | 0.4117 | 0.0747 | 0.3552  | 1.0000  | 1.0000  |
| $N = 256$                        | 0.4056             | 0.0512              | 0.4035 | 0.4066 | 0.0512 | 1.3117  | 1.0000  | 1.0000  |
| $p = 32, q = 4, V(\Sigma) = 0.1$ |                    |                     |        |        |        |         |         |         |
| $N = 4$                          | 0.4854             | 0.3402              | 0.4019 | 0.4886 | 0.3388 | 0.6713  | 0.3194  | 0.2274  |
| $N = 8$                          | 0.2652             | 0.1302              | 0.2360 | 0.2642 | 0.1296 | -0.5586 | 0.6138  | 0.5124  |
| $N = 16$                         | 0.1771             | 0.0629              | 0.1674 | 0.1779 | 0.0631 | 0.9277  | 0.9636  | 0.9400  |
| $N = 32$                         | 0.1373             | 0.0353              | 0.1328 | 0.1367 | 0.0352 | -1.1192 | 1.0000  | 1.0000  |
| $N = 64$                         | 0.1184             | 0.0218              | 0.1165 | 0.1184 | 0.0220 | 0.1788  | 1.0000  | 1.0000  |
| $N = 128$                        | 0.1091             | 0.0144              | 0.1083 | 0.1090 | 0.0145 | -0.2811 | 1.0000  | 1.0000  |
| $N = 256$                        | 0.1045             | 0.0098              | 0.1040 | 0.1045 | 0.0097 | -0.4697 | 1.0000  | 1.0000  |
| $p = 32, q = 4, V(\Sigma) = 0.2$ |                    |                     |        |        |        |         |         |         |
| $N = 4$                          | 0.6167             | 0.5314              | 0.4570 | 0.6124 | 0.5398 | -0.5531 | 0.4180  | 0.3282  |
| $N = 8$                          | 0.3786             | 0.2145              | 0.3322 | 0.3764 | 0.2149 | -0.6987 | 0.7890  | 0.7306  |
| $N = 16$                         | 0.2833             | 0.1087              | 0.2658 | 0.2811 | 0.1065 | -1.4855 | 0.9964  | 0.9934  |
| $N = 32$                         | 0.2403             | 0.0633              | 0.2333 | 0.2405 | 0.0644 | 0.2077  | 1.0000  | 1.0000  |
| $N = 64$                         | 0.2198             | 0.0402              | 0.2162 | 0.2190 | 0.0398 | -1.5583 | 1.0000  | 1.0000  |
| $N = 128$                        | 0.2098             | 0.0268              | 0.2084 | 0.2094 | 0.0268 | -1.0612 | 1.0000  | 1.0000  |
| $N = 256$                        | 0.2049             | 0.0184              | 0.2043 | 0.2051 | 0.0184 | 0.6105  | 1.0000  | 1.0000  |

(continued)

**Table S1.** (continued)

|                                  | $E[V(\mathbf{S})]$ | $SD[V(\mathbf{S})]$ | Median | Mean   | ESD    | $T$     | Pow. 5% | Pow. 1% |
|----------------------------------|--------------------|---------------------|--------|--------|--------|---------|---------|---------|
| $p = 64, q = 1, V(\Sigma) = 0.1$ |                    |                     |        |        |        |         |         |         |
| $N = 4$                          | 0.4760             | 0.4308              | 0.3333 | 0.4758 | 0.4454 | -0.0458 | 0.3174  | 0.2566  |
| $N = 8$                          | 0.2612             | 0.1848              | 0.2043 | 0.2593 | 0.1808 | -0.7361 | 0.5748  | 0.5076  |
| $N = 16$                         | 0.1752             | 0.0994              | 0.1502 | 0.1743 | 0.0977 | -0.6293 | 0.8884  | 0.8608  |
| $N = 32$                         | 0.1364             | 0.0606              | 0.1243 | 0.1368 | 0.0603 | 0.4427  | 0.9986  | 0.9970  |
| $N = 64$                         | 0.1179             | 0.0396              | 0.1123 | 0.1179 | 0.0407 | -0.0656 | 1.0000  | 1.0000  |
| $N = 128$                        | 0.1089             | 0.0269              | 0.1062 | 0.1088 | 0.0268 | -0.2292 | 1.0000  | 1.0000  |
| $N = 256$                        | 0.1044             | 0.0187              | 0.1031 | 0.1046 | 0.0188 | 0.7075  | 1.0000  | 1.0000  |
| $p = 64, q = 1, V(\Sigma) = 0.2$ |                    |                     |        |        |        |         |         |         |
| $N = 4$                          | 0.6083             | 0.7426              | 0.3491 | 0.6187 | 0.7564 | 0.9699  | 0.3862  | 0.3406  |
| $N = 8$                          | 0.3750             | 0.3342              | 0.2724 | 0.3693 | 0.3084 | -1.2970 | 0.6930  | 0.6404  |
| $N = 16$                         | 0.2817             | 0.1862              | 0.2395 | 0.2846 | 0.1881 | 1.0946  | 0.9514  | 0.9416  |
| $N = 32$                         | 0.2395             | 0.1162              | 0.2189 | 0.2410 | 0.1161 | 0.8880  | 0.9998  | 0.9998  |
| $N = 64$                         | 0.2194             | 0.0770              | 0.2075 | 0.2185 | 0.0768 | -0.8362 | 1.0000  | 1.0000  |
| $N = 128$                        | 0.2096             | 0.0527              | 0.2032 | 0.2090 | 0.0534 | -0.8819 | 1.0000  | 1.0000  |
| $N = 256$                        | 0.2048             | 0.0366              | 0.2024 | 0.2051 | 0.0368 | 0.5577  | 1.0000  | 1.0000  |
| $p = 64, q = 1, V(\Sigma) = 0.4$ |                    |                     |        |        |        |         |         |         |
| $N = 4$                          | 0.8729             | 1.3270              | 0.4193 | 0.8856 | 1.3267 | 0.6763  | 0.4664  | 0.4264  |
| $N = 8$                          | 0.6027             | 0.6206              | 0.4227 | 0.6052 | 0.5988 | 0.2997  | 0.7806  | 0.7568  |
| $N = 16$                         | 0.4946             | 0.3554              | 0.4061 | 0.5021 | 0.3631 | 1.4613  | 0.9818  | 0.9778  |
| $N = 32$                         | 0.4458             | 0.2255              | 0.4003 | 0.4445 | 0.2244 | -0.4124 | 1.0000  | 1.0000  |
| $N = 64$                         | 0.4225             | 0.1509              | 0.3986 | 0.4237 | 0.1546 | 0.5322  | 1.0000  | 1.0000  |
| $N = 128$                        | 0.4112             | 0.1038              | 0.4015 | 0.4125 | 0.1038 | 0.9057  | 1.0000  | 1.0000  |
| $N = 256$                        | 0.4056             | 0.0724              | 0.4003 | 0.4058 | 0.0718 | 0.1941  | 1.0000  | 1.0000  |
| $p = 64, q = 1, V(\Sigma) = 0.6$ |                    |                     |        |        |        |         |         |         |
| $N = 4$                          | 1.1375             | 1.8888              | 0.4781 | 1.1311 | 1.8346 | -0.2450 | 0.5040  | 0.4696  |
| $N = 8$                          | 0.8304             | 0.8999              | 0.5503 | 0.8546 | 0.9505 | 1.8043  | 0.8352  | 0.8128  |
| $N = 16$                         | 0.7075             | 0.5220              | 0.5693 | 0.7136 | 0.5361 | 0.8002  | 0.9914  | 0.9892  |
| $N = 32$                         | 0.6520             | 0.3338              | 0.5899 | 0.6555 | 0.3387 | 0.7324  | 1.0000  | 1.0000  |
| $N = 64$                         | 0.6256             | 0.2243              | 0.5963 | 0.6275 | 0.2229 | 0.6155  | 1.0000  | 1.0000  |
| $N = 128$                        | 0.6127             | 0.1546              | 0.5961 | 0.6119 | 0.1532 | -0.3828 | 1.0000  | 1.0000  |
| $N = 256$                        | 0.6063             | 0.1079              | 0.5985 | 0.6067 | 0.1078 | 0.2554  | 1.0000  | 1.0000  |
| $p = 64, q = 1, V(\Sigma) = 0.8$ |                    |                     |        |        |        |         |         |         |
| $N = 4$                          | 1.4021             | 2.4389              | 0.5397 | 1.3796 | 2.3986 | -0.6620 | 0.5362  | 0.5010  |
| $N = 8$                          | 1.0580             | 1.1756              | 0.6979 | 1.0755 | 1.2081 | 1.0231  | 0.8678  | 0.8528  |
| $N = 16$                         | 0.9204             | 0.6873              | 0.7463 | 0.9304 | 0.7024 | 1.0083  | 0.9940  | 0.9934  |
| $N = 32$                         | 0.8583             | 0.4415              | 0.7643 | 0.8495 | 0.4352 | -1.4315 | 1.0000  | 1.0000  |
| $N = 64$                         | 0.8287             | 0.2975              | 0.7873 | 0.8292 | 0.2977 | 0.1296  | 1.0000  | 1.0000  |
| $N = 128$                        | 0.8142             | 0.2053              | 0.7973 | 0.8192 | 0.2071 | 1.6973  | 1.0000  | 1.0000  |
| $N = 256$                        | 0.8071             | 0.1434              | 0.7976 | 0.8060 | 0.1420 | -0.5233 | 1.0000  | 1.0000  |

(continued)

**Table S1.** (continued)

|                                  | $E[V(\mathbf{S})]$ | $SD[V(\mathbf{S})]$ | Median | Mean   | ESD    | $T$     | Pow. 5% | Pow. 1% |
|----------------------------------|--------------------|---------------------|--------|--------|--------|---------|---------|---------|
| $p = 64, q = 2, V(\Sigma) = 0.1$ |                    |                     |        |        |        |         |         |         |
| $N = 4$                          | 0.4760             | 0.3647              | 0.3655 | 0.4774 | 0.3706 | 0.2548  | 0.3576  | 0.2884  |
| $N = 8$                          | 0.2612             | 0.1484              | 0.2234 | 0.2611 | 0.1483 | -0.0339 | 0.6472  | 0.5736  |
| $N = 16$                         | 0.1752             | 0.0763              | 0.1602 | 0.1761 | 0.0777 | 0.8173  | 0.9538  | 0.9342  |
| $N = 32$                         | 0.1364             | 0.0450              | 0.1300 | 0.1364 | 0.0459 | -0.0466 | 1.0000  | 0.9998  |
| $N = 64$                         | 0.1179             | 0.0288              | 0.1151 | 0.1178 | 0.0284 | -0.3278 | 1.0000  | 1.0000  |
| $N = 128$                        | 0.1089             | 0.0194              | 0.1076 | 0.1090 | 0.0193 | 0.4459  | 1.0000  | 1.0000  |
| $N = 256$                        | 0.1044             | 0.0133              | 0.1037 | 0.1045 | 0.0133 | 0.1905  | 1.0000  | 1.0000  |
| $p = 64, q = 2, V(\Sigma) = 0.2$ |                    |                     |        |        |        |         |         |         |
| $N = 4$                          | 0.6083             | 0.6086              | 0.4144 | 0.6043 | 0.5838 | -0.4854 | 0.4464  | 0.3862  |
| $N = 8$                          | 0.3750             | 0.2610              | 0.3152 | 0.3799 | 0.2633 | 1.3251  | 0.7896  | 0.7500  |
| $N = 16$                         | 0.2817             | 0.1398              | 0.2526 | 0.2804 | 0.1409 | -0.6185 | 0.9872  | 0.9804  |
| $N = 32$                         | 0.2395             | 0.0849              | 0.2266 | 0.2399 | 0.0865 | 0.3471  | 1.0000  | 1.0000  |
| $N = 64$                         | 0.2194             | 0.0554              | 0.2136 | 0.2187 | 0.0554 | -0.9000 | 1.0000  | 1.0000  |
| $N = 128$                        | 0.2096             | 0.0376              | 0.2069 | 0.2100 | 0.0379 | 0.7484  | 1.0000  | 1.0000  |
| $N = 256$                        | 0.2048             | 0.0260              | 0.2037 | 0.2047 | 0.0260 | -0.3568 | 1.0000  | 1.0000  |
| $p = 64, q = 2, V(\Sigma) = 0.4$ |                    |                     |        |        |        |         |         |         |
| $N = 4$                          | 0.8729             | 1.0582              | 0.5340 | 0.8914 | 1.0620 | 1.2328  | 0.5470  | 0.4978  |
| $N = 8$                          | 0.6027             | 0.4740              | 0.4713 | 0.5962 | 0.4669 | -0.9845 | 0.8740  | 0.8518  |
| $N = 16$                         | 0.4946             | 0.2625              | 0.4487 | 0.4998 | 0.2602 | 1.4063  | 0.9984  | 0.9982  |
| $N = 32$                         | 0.4458             | 0.1629              | 0.4222 | 0.4444 | 0.1605 | -0.6045 | 1.0000  | 1.0000  |
| $N = 64$                         | 0.4225             | 0.1076              | 0.4081 | 0.4211 | 0.1085 | -0.8938 | 1.0000  | 1.0000  |
| $N = 128$                        | 0.4112             | 0.0735              | 0.4061 | 0.4104 | 0.0715 | -0.7768 | 1.0000  | 1.0000  |
| $N = 256$                        | 0.4056             | 0.0511              | 0.4024 | 0.4048 | 0.0512 | -1.0341 | 1.0000  | 1.0000  |
| $p = 64, q = 4, V(\Sigma) = 0.1$ |                    |                     |        |        |        |         |         |         |
| $N = 4$                          | 0.4760             | 0.3178              | 0.3945 | 0.4743 | 0.3195 | -0.3833 | 0.3938  | 0.3076  |
| $N = 8$                          | 0.2612             | 0.1226              | 0.2379 | 0.2603 | 0.1197 | -0.5099 | 0.7108  | 0.6280  |
| $N = 16$                         | 0.1752             | 0.0598              | 0.1658 | 0.1756 | 0.0600 | 0.4656  | 0.9836  | 0.9720  |
| $N = 32$                         | 0.1364             | 0.0338              | 0.1325 | 0.1363 | 0.0341 | -0.0890 | 1.0000  | 1.0000  |
| $N = 64$                         | 0.1179             | 0.0211              | 0.1167 | 0.1182 | 0.0214 | 0.8725  | 1.0000  | 1.0000  |
| $N = 128$                        | 0.1089             | 0.0139              | 0.1082 | 0.1087 | 0.0139 | -1.0247 | 1.0000  | 1.0000  |
| $N = 256$                        | 0.1044             | 0.0095              | 0.1041 | 0.1044 | 0.0094 | 0.1697  | 1.0000  | 1.0000  |
| $p = 64, q = 4, V(\Sigma) = 0.2$ |                    |                     |        |        |        |         |         |         |
| $N = 4$                          | 0.6083             | 0.5135              | 0.4635 | 0.6089 | 0.5082 | 0.0738  | 0.4944  | 0.4314  |
| $N = 8$                          | 0.3750             | 0.2089              | 0.3325 | 0.3748 | 0.2074 | -0.0607 | 0.8514  | 0.8052  |
| $N = 16$                         | 0.2817             | 0.1067              | 0.2634 | 0.2821 | 0.1090 | 0.2833  | 0.9986  | 0.9978  |
| $N = 32$                         | 0.2395             | 0.0625              | 0.2332 | 0.2399 | 0.0631 | 0.4617  | 1.0000  | 1.0000  |
| $N = 64$                         | 0.2194             | 0.0398              | 0.2163 | 0.2193 | 0.0391 | -0.1922 | 1.0000  | 1.0000  |
| $N = 128$                        | 0.2096             | 0.0266              | 0.2082 | 0.2097 | 0.0269 | 0.2535  | 1.0000  | 1.0000  |
| $N = 256$                        | 0.2048             | 0.0183              | 0.2041 | 0.2048 | 0.0180 | -0.0932 | 1.0000  | 1.0000  |

(continued)

**Table S1.** (continued)

|                                   | $E[V(\mathbf{S})]$ | $SD[V(\mathbf{S})]$ | Median | Mean   | ESD    | $T$     | Pow. 5% | Pow. 1% |
|-----------------------------------|--------------------|---------------------|--------|--------|--------|---------|---------|---------|
| $p = 128, q = 1, V(\Sigma) = 0.1$ |                    |                     |        |        |        |         |         |         |
| $N = 4$                           | 0.4714             | 0.4196              | 0.3291 | 0.4669 | 0.4247 | -0.7376 | 0.3562  | 0.3112  |
| $N = 8$                           | 0.2592             | 0.1806              | 0.2074 | 0.2641 | 0.1886 | 1.8401  | 0.6340  | 0.5912  |
| $N = 16$                          | 0.1743             | 0.0974              | 0.1518 | 0.1752 | 0.0980 | 0.7020  | 0.9224  | 0.9012  |
| $N = 32$                          | 0.1359             | 0.0595              | 0.1265 | 0.1368 | 0.0594 | 0.9989  | 0.9992  | 0.9986  |
| $N = 64$                          | 0.1177             | 0.0389              | 0.1114 | 0.1171 | 0.0390 | -0.9930 | 1.0000  | 1.0000  |
| $N = 128$                         | 0.1088             | 0.0265              | 0.1056 | 0.1084 | 0.0266 | -1.1044 | 1.0000  | 1.0000  |
| $N = 256$                         | 0.1044             | 0.0183              | 0.1033 | 0.1043 | 0.0182 | -0.1878 | 1.0000  | 1.0000  |
| $p = 128, q = 1, V(\Sigma) = 0.2$ |                    |                     |        |        |        |         |         |         |
| $N = 4$                           | 0.6042             | 0.7319              | 0.3521 | 0.5941 | 0.7030 | -1.0089 | 0.4288  | 0.3906  |
| $N = 8$                           | 0.3732             | 0.3300              | 0.2737 | 0.3806 | 0.3437 | 1.5247  | 0.7364  | 0.7076  |
| $N = 16$                          | 0.2808             | 0.1841              | 0.2350 | 0.2831 | 0.1925 | 0.8332  | 0.9602  | 0.9538  |
| $N = 32$                          | 0.2391             | 0.1150              | 0.2179 | 0.2394 | 0.1158 | 0.1938  | 1.0000  | 1.0000  |
| $N = 64$                          | 0.2192             | 0.0763              | 0.2096 | 0.2198 | 0.0762 | 0.5014  | 1.0000  | 1.0000  |
| $N = 128$                         | 0.2095             | 0.0522              | 0.2045 | 0.2108 | 0.0529 | 1.7078  | 1.0000  | 1.0000  |
| $N = 256$                         | 0.2048             | 0.0363              | 0.2012 | 0.2045 | 0.0363 | -0.5260 | 1.0000  | 1.0000  |
| $p = 128, q = 1, V(\Sigma) = 0.4$ |                    |                     |        |        |        |         |         |         |
| $N = 4$                           | 0.8698             | 1.3180              | 0.4240 | 0.8793 | 1.3211 | 0.5077  | 0.5012  | 0.4752  |
| $N = 8$                           | 0.6013             | 0.6170              | 0.4109 | 0.6010 | 0.6166 | -0.0393 | 0.8032  | 0.7886  |
| $N = 16$                          | 0.4940             | 0.3536              | 0.3964 | 0.4838 | 0.3447 | -2.0799 | 0.9856  | 0.9832  |
| $N = 32$                          | 0.4455             | 0.2244              | 0.4018 | 0.4478 | 0.2249 | 0.7386  | 1.0000  | 1.0000  |
| $N = 64$                          | 0.4224             | 0.1502              | 0.3989 | 0.4221 | 0.1513 | -0.1182 | 1.0000  | 1.0000  |
| $N = 128$                         | 0.4111             | 0.1033              | 0.4000 | 0.4103 | 0.1041 | -0.5203 | 1.0000  | 1.0000  |
| $N = 256$                         | 0.4055             | 0.0720              | 0.4015 | 0.4075 | 0.0718 | 1.8953  | 1.0000  | 1.0000  |
| $p = 128, q = 1, V(\Sigma) = 0.6$ |                    |                     |        |        |        |         |         |         |
| $N = 4$                           | 1.1354             | 1.8824              | 0.4797 | 1.1748 | 1.9845 | 1.4033  | 0.5288  | 0.5084  |
| $N = 8$                           | 0.8295             | 0.8973              | 0.5462 | 0.8334 | 0.8762 | 0.3179  | 0.8454  | 0.8346  |
| $N = 16$                          | 0.7071             | 0.5206              | 0.5797 | 0.7083 | 0.5151 | 0.1716  | 0.9932  | 0.9926  |
| $N = 32$                          | 0.6518             | 0.3330              | 0.5881 | 0.6544 | 0.3402 | 0.5470  | 1.0000  | 1.0000  |
| $N = 64$                          | 0.6255             | 0.2238              | 0.5970 | 0.6273 | 0.2257 | 0.5778  | 1.0000  | 1.0000  |
| $N = 128$                         | 0.6126             | 0.1543              | 0.5996 | 0.6139 | 0.1541 | 0.5810  | 1.0000  | 1.0000  |
| $N = 256$                         | 0.6063             | 0.1077              | 0.5977 | 0.6059 | 0.1071 | -0.2419 | 1.0000  | 1.0000  |
| $p = 128, q = 1, V(\Sigma) = 0.8$ |                    |                     |        |        |        |         |         |         |
| $N = 4$                           | 1.4010             | 2.4355              | 0.5423 | 1.3818 | 2.6633 | -0.5106 | 0.5578  | 0.5376  |
| $N = 8$                           | 1.0576             | 1.1742              | 0.6488 | 1.0314 | 1.1393 | -1.6229 | 0.8726  | 0.8598  |
| $N = 16$                          | 0.9202             | 0.6865              | 0.7373 | 0.9009 | 0.6625 | -2.0655 | 0.9960  | 0.9958  |
| $N = 32$                          | 0.8582             | 0.4411              | 0.7650 | 0.8551 | 0.4435 | -0.4819 | 1.0000  | 1.0000  |
| $N = 64$                          | 0.8286             | 0.2972              | 0.7932 | 0.8344 | 0.2987 | 1.3577  | 1.0000  | 1.0000  |
| $N = 128$                         | 0.8142             | 0.2051              | 0.7948 | 0.8175 | 0.2073 | 1.1298  | 1.0000  | 1.0000  |
| $N = 256$                         | 0.8071             | 0.1433              | 0.7941 | 0.8035 | 0.1427 | -1.7684 | 1.0000  | 1.0000  |

(continued)

**Table S1.** (continued)

|                                   | $E[V(\mathbf{S})]$ | $SD[V(\mathbf{S})]$ | Median | Mean   | ESD    | $T$     | Pow. 5% | Pow. 1% |
|-----------------------------------|--------------------|---------------------|--------|--------|--------|---------|---------|---------|
| $p = 128, q = 2, V(\Sigma) = 0.1$ |                    |                     |        |        |        |         |         |         |
| $N = 4$                           | 0.4714             | 0.3532              | 0.3619 | 0.4658 | 0.3508 | -1.1137 | 0.4058  | 0.3562  |
| $N = 8$                           | 0.2592             | 0.1443              | 0.2255 | 0.2602 | 0.1458 | 0.4873  | 0.7038  | 0.6668  |
| $N = 16$                          | 0.1743             | 0.0744              | 0.1585 | 0.1736 | 0.0734 | -0.6676 | 0.9692  | 0.9588  |
| $N = 32$                          | 0.1359             | 0.0440              | 0.1292 | 0.1347 | 0.0428 | -2.0088 | 1.0000  | 1.0000  |
| $N = 64$                          | 0.1177             | 0.0283              | 0.1151 | 0.1181 | 0.0284 | 1.0985  | 1.0000  | 1.0000  |
| $N = 128$                         | 0.1088             | 0.0190              | 0.1073 | 0.1089 | 0.0190 | 0.6346  | 1.0000  | 1.0000  |
| $N = 256$                         | 0.1044             | 0.0131              | 0.1033 | 0.1043 | 0.0130 | -0.1708 | 1.0000  | 1.0000  |
| $p = 128, q = 2, V(\Sigma) = 0.2$ |                    |                     |        |        |        |         |         |         |
| $N = 4$                           | 0.6042             | 0.5982              | 0.4138 | 0.6028 | 0.6034 | -0.1628 | 0.4912  | 0.4532  |
| $N = 8$                           | 0.3732             | 0.2572              | 0.3105 | 0.3757 | 0.2607 | 0.6690  | 0.8210  | 0.7964  |
| $N = 16$                          | 0.2808             | 0.1381              | 0.2512 | 0.2803 | 0.1416 | -0.2466 | 0.9918  | 0.9896  |
| $N = 32$                          | 0.2391             | 0.0840              | 0.2269 | 0.2387 | 0.0826 | -0.3229 | 1.0000  | 1.0000  |
| $N = 64$                          | 0.2192             | 0.0549              | 0.2138 | 0.2191 | 0.0556 | -0.2106 | 1.0000  | 1.0000  |
| $N = 128$                         | 0.2095             | 0.0372              | 0.2063 | 0.2095 | 0.0378 | -0.0391 | 1.0000  | 1.0000  |
| $N = 256$                         | 0.2048             | 0.0258              | 0.2036 | 0.2047 | 0.0259 | -0.1840 | 1.0000  | 1.0000  |
| $p = 128, q = 2, V(\Sigma) = 0.4$ |                    |                     |        |        |        |         |         |         |
| $N = 4$                           | 0.8698             | 1.0506              | 0.5457 | 0.8847 | 1.0750 | 0.9798  | 0.5790  | 0.5540  |
| $N = 8$                           | 0.6013             | 0.4714              | 0.4772 | 0.6031 | 0.4732 | 0.2588  | 0.9008  | 0.8864  |
| $N = 16$                          | 0.4940             | 0.2615              | 0.4404 | 0.4875 | 0.2552 | -1.7810 | 0.9990  | 0.9988  |
| $N = 32$                          | 0.4455             | 0.1625              | 0.4232 | 0.4457 | 0.1604 | 0.0840  | 1.0000  | 1.0000  |
| $N = 64$                          | 0.4224             | 0.1074              | 0.4136 | 0.4238 | 0.1074 | 0.9228  | 1.0000  | 1.0000  |
| $N = 128$                         | 0.4111             | 0.0734              | 0.4042 | 0.4099 | 0.0734 | -1.1445 | 1.0000  | 1.0000  |
| $N = 256$                         | 0.4055             | 0.0510              | 0.4026 | 0.4058 | 0.0508 | 0.3393  | 1.0000  | 1.0000  |
| $p = 128, q = 4, V(\Sigma) = 0.1$ |                    |                     |        |        |        |         |         |         |
| $N = 4$                           | 0.4714             | 0.3065              | 0.3956 | 0.4754 | 0.3052 | 0.9466  | 0.4594  | 0.4060  |
| $N = 8$                           | 0.2592             | 0.1187              | 0.2303 | 0.2571 | 0.1193 | -1.2327 | 0.7618  | 0.7164  |
| $N = 16$                          | 0.1743             | 0.0582              | 0.1659 | 0.1748 | 0.0586 | 0.6611  | 0.9918  | 0.9884  |
| $N = 32$                          | 0.1359             | 0.0331              | 0.1314 | 0.1355 | 0.0331 | -0.9953 | 1.0000  | 1.0000  |
| $N = 64$                          | 0.1177             | 0.0206              | 0.1160 | 0.1174 | 0.0208 | -1.0099 | 1.0000  | 1.0000  |
| $N = 128$                         | 0.1088             | 0.0137              | 0.1078 | 0.1087 | 0.0136 | -0.3031 | 1.0000  | 1.0000  |
| $N = 256$                         | 0.1044             | 0.0093              | 0.1040 | 0.1041 | 0.0093 | -1.8770 | 1.0000  | 1.0000  |
| $p = 128, q = 4, V(\Sigma) = 0.2$ |                    |                     |        |        |        |         |         |         |
| $N = 4$                           | 0.6042             | 0.5044              | 0.4654 | 0.5986 | 0.4922 | -0.8044 | 0.5486  | 0.5040  |
| $N = 8$                           | 0.3732             | 0.2059              | 0.3269 | 0.3715 | 0.2029 | -0.5889 | 0.8868  | 0.8642  |
| $N = 16$                          | 0.2808             | 0.1056              | 0.2666 | 0.2834 | 0.1064 | 1.7057  | 0.9996  | 0.9988  |
| $N = 32$                          | 0.2391             | 0.0621              | 0.2328 | 0.2400 | 0.0629 | 1.0371  | 1.0000  | 1.0000  |
| $N = 64$                          | 0.2192             | 0.0396              | 0.2166 | 0.2192 | 0.0400 | -0.0044 | 1.0000  | 1.0000  |
| $N = 128$                         | 0.2095             | 0.0265              | 0.2077 | 0.2093 | 0.0261 | -0.7459 | 1.0000  | 1.0000  |
| $N = 256$                         | 0.2048             | 0.0183              | 0.2044 | 0.2049 | 0.0183 | 0.5881  | 1.0000  | 1.0000  |

(continued)

**Table S1.** (continued)

|                                   | $E[V(\mathbf{S})]$ | $SD[V(\mathbf{S})]$ | Median | Mean   | ESD    | $T$     | Pow. 5% | Pow. 1% |
|-----------------------------------|--------------------|---------------------|--------|--------|--------|---------|---------|---------|
| $p = 256, q = 1, V(\Sigma) = 0.1$ |                    |                     |        |        |        |         |         |         |
| $N = 4$                           | 0.4690             | 0.4140              | 0.3288 | 0.4640 | 0.3993 | -0.8845 | 0.3936  | 0.3548  |
| $N = 8$                           | 0.2581             | 0.1786              | 0.1992 | 0.2538 | 0.1758 | -1.7463 | 0.6480  | 0.6122  |
| $N = 16$                          | 0.1738             | 0.0964              | 0.1501 | 0.1722 | 0.0929 | -1.2156 | 0.9370  | 0.9300  |
| $N = 32$                          | 0.1357             | 0.0589              | 0.1226 | 0.1338 | 0.0571 | -2.3990 | 0.9986  | 0.9984  |
| $N = 64$                          | 0.1176             | 0.0386              | 0.1122 | 0.1177 | 0.0384 | 0.1675  | 1.0000  | 1.0000  |
| $N = 128$                         | 0.1087             | 0.0262              | 0.1063 | 0.1086 | 0.0261 | -0.1824 | 1.0000  | 1.0000  |
| $N = 256$                         | 0.1043             | 0.0182              | 0.1027 | 0.1043 | 0.0184 | -0.2755 | 1.0000  | 1.0000  |
| $p = 256, q = 1, V(\Sigma) = 0.2$ |                    |                     |        |        |        |         |         |         |
| $N = 4$                           | 0.6021             | 0.7265              | 0.3493 | 0.5926 | 0.7138 | -0.9406 | 0.4574  | 0.4288  |
| $N = 8$                           | 0.3723             | 0.3279              | 0.2676 | 0.3679 | 0.3236 | -0.9750 | 0.7410  | 0.7150  |
| $N = 16$                          | 0.2804             | 0.1831              | 0.2332 | 0.2806 | 0.1813 | 0.0870  | 0.9712  | 0.9664  |
| $N = 32$                          | 0.2389             | 0.1144              | 0.2166 | 0.2377 | 0.1138 | -0.7437 | 1.0000  | 1.0000  |
| $N = 64$                          | 0.2191             | 0.0759              | 0.2104 | 0.2196 | 0.0772 | 0.4276  | 1.0000  | 1.0000  |
| $N = 128$                         | 0.2095             | 0.0519              | 0.2059 | 0.2104 | 0.0518 | 1.2576  | 1.0000  | 1.0000  |
| $N = 256$                         | 0.2047             | 0.0361              | 0.2017 | 0.2050 | 0.0361 | 0.5110  | 1.0000  | 1.0000  |
| $p = 256, q = 1, V(\Sigma) = 0.4$ |                    |                     |        |        |        |         |         |         |
| $N = 4$                           | 0.8682             | 1.3136              | 0.4188 | 0.8545 | 1.2792 | -0.7569 | 0.5160  | 0.4972  |
| $N = 8$                           | 0.6007             | 0.6151              | 0.4140 | 0.6076 | 0.6137 | 0.7995  | 0.8272  | 0.8158  |
| $N = 16$                          | 0.4936             | 0.3526              | 0.4000 | 0.4873 | 0.3492 | -1.2751 | 0.9882  | 0.9872  |
| $N = 32$                          | 0.4453             | 0.2239              | 0.4068 | 0.4465 | 0.2213 | 0.3813  | 1.0000  | 1.0000  |
| $N = 64$                          | 0.4223             | 0.1499              | 0.4003 | 0.4234 | 0.1505 | 0.5054  | 1.0000  | 1.0000  |
| $N = 128$                         | 0.4111             | 0.1031              | 0.3965 | 0.4095 | 0.1027 | -1.0603 | 1.0000  | 1.0000  |
| $N = 256$                         | 0.4055             | 0.0719              | 0.4012 | 0.4060 | 0.0719 | 0.4926  | 1.0000  | 1.0000  |
| $p = 256, q = 1, V(\Sigma) = 0.6$ |                    |                     |        |        |        |         |         |         |
| $N = 4$                           | 1.1344             | 1.8792              | 0.4711 | 1.0961 | 1.7882 | -1.5150 | 0.5510  | 0.5306  |
| $N = 8$                           | 0.8290             | 0.8960              | 0.5433 | 0.8354 | 0.8985 | 0.5049  | 0.8694  | 0.8588  |
| $N = 16$                          | 0.7069             | 0.5200              | 0.5747 | 0.7078 | 0.5192 | 0.1261  | 0.9946  | 0.9936  |
| $N = 32$                          | 0.6517             | 0.3326              | 0.5949 | 0.6581 | 0.3348 | 1.3577  | 1.0000  | 1.0000  |
| $N = 64$                          | 0.6254             | 0.2235              | 0.5884 | 0.6207 | 0.2239 | -1.4937 | 1.0000  | 1.0000  |
| $N = 128$                         | 0.6126             | 0.1541              | 0.5974 | 0.6123 | 0.1544 | -0.1619 | 1.0000  | 1.0000  |
| $N = 256$                         | 0.6063             | 0.1076              | 0.5994 | 0.6061 | 0.1066 | -0.1095 | 1.0000  | 1.0000  |
| $p = 256, q = 1, V(\Sigma) = 0.8$ |                    |                     |        |        |        |         |         |         |
| $N = 4$                           | 1.4005             | 2.4338              | 0.5288 | 1.4172 | 2.5212 | 0.4676  | 0.5650  | 0.5524  |
| $N = 8$                           | 1.0574             | 1.1735              | 0.6982 | 1.0818 | 1.1935 | 1.4492  | 0.8902  | 0.8828  |
| $N = 16$                          | 0.9201             | 0.6862              | 0.7373 | 0.9122 | 0.6746 | -0.8321 | 0.9964  | 0.9964  |
| $N = 32$                          | 0.8581             | 0.4409              | 0.7749 | 0.8663 | 0.4540 | 1.2689  | 1.0000  | 1.0000  |
| $N = 64$                          | 0.8286             | 0.2971              | 0.7824 | 0.8219 | 0.2873 | -1.6582 | 1.0000  | 1.0000  |
| $N = 128$                         | 0.8142             | 0.2050              | 0.7977 | 0.8154 | 0.2033 | 0.4365  | 1.0000  | 1.0000  |
| $N = 256$                         | 0.8071             | 0.1432              | 0.7974 | 0.8086 | 0.1460 | 0.7277  | 1.0000  | 1.0000  |

(continued)



**Table S1.** (continued)

|                                   | $E[V(\mathbf{S})]$ | $SD[V(\mathbf{S})]$ | Median | Mean   | ESD    | $T$     | Pow. 5% | Pow. 1% |
|-----------------------------------|--------------------|---------------------|--------|--------|--------|---------|---------|---------|
| $p = 256, q = 2, V(\Sigma) = 0.1$ |                    |                     |        |        |        |         |         |         |
| $N = 4$                           | 0.4690             | 0.3474              | 0.3654 | 0.4634 | 0.3480 | -1.1409 | 0.4556  | 0.4024  |
| $N = 8$                           | 0.2581             | 0.1423              | 0.2253 | 0.2595 | 0.1427 | 0.6890  | 0.7438  | 0.7116  |
| $N = 16$                          | 0.1738             | 0.0735              | 0.1578 | 0.1718 | 0.0736 | -1.9007 | 0.9722  | 0.9690  |
| $N = 32$                          | 0.1357             | 0.0435              | 0.1283 | 0.1348 | 0.0426 | -1.5449 | 1.0000  | 1.0000  |
| $N = 64$                          | 0.1176             | 0.0280              | 0.1144 | 0.1177 | 0.0281 | 0.2848  | 1.0000  | 1.0000  |
| $N = 128$                         | 0.1087             | 0.0188              | 0.1069 | 0.1084 | 0.0189 | -1.0010 | 1.0000  | 1.0000  |
| $N = 256$                         | 0.1043             | 0.0130              | 0.1040 | 0.1046 | 0.0131 | 1.4744  | 1.0000  | 1.0000  |
| $p = 256, q = 2, V(\Sigma) = 0.2$ |                    |                     |        |        |        |         |         |         |
| $N = 4$                           | 0.6021             | 0.5930              | 0.4144 | 0.5971 | 0.6015 | -0.5910 | 0.5248  | 0.4916  |
| $N = 8$                           | 0.3723             | 0.2553              | 0.3056 | 0.3701 | 0.2520 | -0.6132 | 0.8336  | 0.8142  |
| $N = 16$                          | 0.2804             | 0.1372              | 0.2539 | 0.2790 | 0.1348 | -0.7403 | 0.9926  | 0.9912  |
| $N = 32$                          | 0.2389             | 0.0836              | 0.2263 | 0.2379 | 0.0827 | -0.8512 | 1.0000  | 1.0000  |
| $N = 64$                          | 0.2191             | 0.0546              | 0.2131 | 0.2187 | 0.0547 | -0.6298 | 1.0000  | 1.0000  |
| $N = 128$                         | 0.2095             | 0.0370              | 0.2066 | 0.2100 | 0.0367 | 1.0076  | 1.0000  | 1.0000  |
| $N = 256$                         | 0.2047             | 0.0256              | 0.2033 | 0.2046 | 0.0255 | -0.4003 | 1.0000  | 1.0000  |
| $p = 256, q = 2, V(\Sigma) = 0.4$ |                    |                     |        |        |        |         |         |         |
| $N = 4$                           | 0.8682             | 1.0468              | 0.5365 | 0.8927 | 1.0995 | 1.5729  | 0.6016  | 0.5770  |
| $N = 8$                           | 0.6007             | 0.4701              | 0.4639 | 0.5909 | 0.4642 | -1.4846 | 0.9042  | 0.8960  |
| $N = 16$                          | 0.4936             | 0.2609              | 0.4474 | 0.5025 | 0.2686 | 2.3407  | 0.9996  | 0.9996  |
| $N = 32$                          | 0.4453             | 0.1622              | 0.4253 | 0.4481 | 0.1594 | 1.2589  | 1.0000  | 1.0000  |
| $N = 64$                          | 0.4223             | 0.1073              | 0.4107 | 0.4221 | 0.1070 | -0.1076 | 1.0000  | 1.0000  |
| $N = 128$                         | 0.4111             | 0.0733              | 0.4038 | 0.4095 | 0.0729 | -1.5460 | 1.0000  | 1.0000  |
| $N = 256$                         | 0.4055             | 0.0509              | 0.4043 | 0.4063 | 0.0516 | 1.1106  | 1.0000  | 1.0000  |
| $p = 256, q = 4, V(\Sigma) = 0.1$ |                    |                     |        |        |        |         |         |         |
| $N = 4$                           | 0.4690             | 0.3008              | 0.3970 | 0.4698 | 0.2910 | 0.1839  | 0.5062  | 0.4560  |
| $N = 8$                           | 0.2581             | 0.1168              | 0.2346 | 0.2563 | 0.1142 | -1.1614 | 0.8074  | 0.7734  |
| $N = 16$                          | 0.1738             | 0.0574              | 0.1645 | 0.1723 | 0.0557 | -1.9201 | 0.9940  | 0.9924  |
| $N = 32$                          | 0.1357             | 0.0327              | 0.1315 | 0.1352 | 0.0326 | -1.1484 | 1.0000  | 1.0000  |
| $N = 64$                          | 0.1176             | 0.0204              | 0.1162 | 0.1178 | 0.0206 | 0.8992  | 1.0000  | 1.0000  |
| $N = 128$                         | 0.1087             | 0.0135              | 0.1082 | 0.1087 | 0.0134 | -0.1494 | 1.0000  | 1.0000  |
| $N = 256$                         | 0.1043             | 0.0092              | 0.1041 | 0.1045 | 0.0092 | 1.2177  | 1.0000  | 1.0000  |
| $p = 256, q = 4, V(\Sigma) = 0.2$ |                    |                     |        |        |        |         |         |         |
| $N = 4$                           | 0.6021             | 0.4998              | 0.4605 | 0.5996 | 0.4947 | -0.3569 | 0.5792  | 0.5418  |
| $N = 8$                           | 0.3723             | 0.2044              | 0.3280 | 0.3694 | 0.2072 | -0.9800 | 0.8912  | 0.8774  |
| $N = 16$                          | 0.2804             | 0.1050              | 0.2652 | 0.2818 | 0.1068 | 0.9360  | 0.9994  | 0.9994  |
| $N = 32$                          | 0.2389             | 0.0618              | 0.2323 | 0.2377 | 0.0614 | -1.4261 | 1.0000  | 1.0000  |
| $N = 64$                          | 0.2191             | 0.0395              | 0.2166 | 0.2189 | 0.0395 | -0.4363 | 1.0000  | 1.0000  |
| $N = 128$                         | 0.2095             | 0.0265              | 0.2082 | 0.2099 | 0.0270 | 1.1301  | 1.0000  | 1.0000  |
| $N = 256$                         | 0.2047             | 0.0182              | 0.2040 | 0.2048 | 0.0180 | 0.1575  | 1.0000  | 1.0000  |

(continued)

**Table S1.** (continued)

|                                    | $E[V(\mathbf{S})]$ | $SD[V(\mathbf{S})]$ | Median | Mean   | ESD    | $T$     | Pow. 5% | Pow. 1% |
|------------------------------------|--------------------|---------------------|--------|--------|--------|---------|---------|---------|
| $p = 1024, q = 1, V(\Sigma) = 0.1$ |                    |                     |        |        |        |         |         |         |
| $N = 4$                            | 0.4673             | 0.4098              | 0.3340 | 0.4614 | 0.3938 | -1.0472 | 0.4516  | 0.4324  |
| $N = 8$                            | 0.2574             | 0.1770              | 0.2071 | 0.2598 | 0.1802 | 0.9277  | 0.7062  | 0.6892  |
| $N = 16$                           | 0.1735             | 0.0957              | 0.1506 | 0.1731 | 0.0955 | -0.2362 | 0.9464  | 0.9400  |
| $N = 32$                           | 0.1355             | 0.0585              | 0.1229 | 0.1345 | 0.0579 | -1.2252 | 1.0000  | 1.0000  |
| $N = 64$                           | 0.1175             | 0.0383              | 0.1119 | 0.1176 | 0.0385 | 0.1237  | 1.0000  | 1.0000  |
| $N = 128$                          | 0.1087             | 0.0261              | 0.1056 | 0.1081 | 0.0258 | -1.5172 | 1.0000  | 1.0000  |
| $N = 256$                          | 0.1043             | 0.0181              | 0.1028 | 0.1041 | 0.0181 | -1.0113 | 1.0000  | 1.0000  |
| $p = 1024, q = 1, V(\Sigma) = 0.2$ |                    |                     |        |        |        |         |         |         |
| $N = 4$                            | 0.6005             | 0.7225              | 0.3486 | 0.6004 | 0.7467 | -0.0149 | 0.4836  | 0.4722  |
| $N = 8$                            | 0.3717             | 0.3263              | 0.2718 | 0.3697 | 0.3275 | -0.4127 | 0.7766  | 0.7646  |
| $N = 16$                           | 0.2801             | 0.1823              | 0.2393 | 0.2820 | 0.1793 | 0.7472  | 0.9752  | 0.9740  |
| $N = 32$                           | 0.2388             | 0.1139              | 0.2163 | 0.2375 | 0.1138 | -0.7599 | 1.0000  | 1.0000  |
| $N = 64$                           | 0.2191             | 0.0756              | 0.2098 | 0.2201 | 0.0761 | 0.9238  | 1.0000  | 1.0000  |
| $N = 128$                          | 0.2095             | 0.0517              | 0.2029 | 0.2079 | 0.0514 | -2.1703 | 1.0000  | 1.0000  |
| $N = 256$                          | 0.2047             | 0.0360              | 0.2010 | 0.2036 | 0.0356 | -2.2748 | 1.0000  | 1.0000  |
| $p = 1024, q = 1, V(\Sigma) = 0.4$ |                    |                     |        |        |        |         |         |         |
| $N = 4$                            | 0.8671             | 1.3102              | 0.4015 | 0.8405 | 1.3164 | -1.4242 | 0.5364  | 0.5234  |
| $N = 8$                            | 0.6002             | 0.6138              | 0.3961 | 0.5940 | 0.6361 | -0.6814 | 0.8298  | 0.8208  |
| $N = 16$                           | 0.4934             | 0.3519              | 0.4015 | 0.4977 | 0.3638 | 0.8432  | 0.9866  | 0.9860  |
| $N = 32$                           | 0.4452             | 0.2235              | 0.4037 | 0.4489 | 0.2304 | 1.1498  | 1.0000  | 1.0000  |
| $N = 64$                           | 0.4222             | 0.1496              | 0.4020 | 0.4240 | 0.1526 | 0.8140  | 1.0000  | 1.0000  |
| $N = 128$                          | 0.4110             | 0.1029              | 0.3979 | 0.4104 | 0.1038 | -0.4592 | 1.0000  | 1.0000  |
| $N = 256$                          | 0.4055             | 0.0717              | 0.4020 | 0.4063 | 0.0728 | 0.7559  | 1.0000  | 1.0000  |
| $p = 1024, q = 1, V(\Sigma) = 0.6$ |                    |                     |        |        |        |         |         |         |
| $N = 4$                            | 1.1336             | 1.8768              | 0.4611 | 1.1261 | 1.9068 | -0.2763 | 0.5542  | 0.5472  |
| $N = 8$                            | 0.8287             | 0.8950              | 0.5476 | 0.8168 | 0.8639 | -0.9740 | 0.8732  | 0.8690  |
| $N = 16$                           | 0.7067             | 0.5194              | 0.5792 | 0.7003 | 0.4944 | -0.9163 | 0.9940  | 0.9938  |
| $N = 32$                           | 0.6516             | 0.3323              | 0.5888 | 0.6511 | 0.3351 | -0.1071 | 1.0000  | 1.0000  |
| $N = 64$                           | 0.6254             | 0.2233              | 0.5952 | 0.6228 | 0.2197 | -0.8267 | 1.0000  | 1.0000  |
| $N = 128$                          | 0.6126             | 0.1539              | 0.5969 | 0.6127 | 0.1505 | 0.0278  | 1.0000  | 1.0000  |
| $N = 256$                          | 0.6063             | 0.1075              | 0.5971 | 0.6056 | 0.1075 | -0.4205 | 1.0000  | 1.0000  |
| $p = 1024, q = 1, V(\Sigma) = 0.8$ |                    |                     |        |        |        |         |         |         |
| $N = 4$                            | 1.4001             | 2.4326              | 0.5395 | 1.3638 | 2.3850 | -1.0764 | 0.5938  | 0.5872  |
| $N = 8$                            | 1.0572             | 1.1729              | 0.6881 | 1.0573 | 1.1723 | 0.0072  | 0.8892  | 0.8864  |
| $N = 16$                           | 0.9200             | 0.6859              | 0.7655 | 0.9344 | 0.6943 | 1.4624  | 0.9964  | 0.9962  |
| $N = 32$                           | 0.8581             | 0.4407              | 0.7709 | 0.8531 | 0.4414 | -0.7945 | 1.0000  | 1.0000  |
| $N = 64$                           | 0.8286             | 0.2969              | 0.7840 | 0.8292 | 0.2987 | 0.1364  | 1.0000  | 1.0000  |
| $N = 128$                          | 0.8142             | 0.2049              | 0.7958 | 0.8135 | 0.2091 | -0.2323 | 1.0000  | 1.0000  |
| $N = 256$                          | 0.8071             | 0.1432              | 0.7897 | 0.8021 | 0.1457 | -2.4090 | 1.0000  | 1.0000  |

(continued)

**Table S1.** (continued)

|                                    | $E[V(\mathbf{S})]$ | $SD[V(\mathbf{S})]$ | Median | Mean   | ESD    | $T$     | Pow. 5% | Pow. 1% |
|------------------------------------|--------------------|---------------------|--------|--------|--------|---------|---------|---------|
| $p = 1024, q = 2, V(\Sigma) = 0.1$ |                    |                     |        |        |        |         |         |         |
| $N = 4$                            | 0.4673             | 0.3431              | 0.3680 | 0.4677 | 0.3375 | 0.0847  | 0.5096  | 0.4900  |
| $N = 8$                            | 0.2574             | 0.1407              | 0.2234 | 0.2551 | 0.1380 | -1.1672 | 0.7816  | 0.7650  |
| $N = 16$                           | 0.1735             | 0.0728              | 0.1589 | 0.1725 | 0.0728 | -0.8882 | 0.9808  | 0.9794  |
| $N = 32$                           | 0.1355             | 0.0432              | 0.1290 | 0.1351 | 0.0430 | -0.7093 | 1.0000  | 1.0000  |
| $N = 64$                           | 0.1175             | 0.0277              | 0.1154 | 0.1181 | 0.0280 | 1.5804  | 1.0000  | 1.0000  |
| $N = 128$                          | 0.1087             | 0.0187              | 0.1075 | 0.1088 | 0.0185 | 0.4350  | 1.0000  | 1.0000  |
| $N = 256$                          | 0.1043             | 0.0129              | 0.1037 | 0.1043 | 0.0129 | 0.1578  | 1.0000  | 1.0000  |
| $p = 1024, q = 2, V(\Sigma) = 0.2$ |                    |                     |        |        |        |         |         |         |
| $N = 4$                            | 0.6005             | 0.5891              | 0.4114 | 0.5972 | 0.6001 | -0.3908 | 0.5562  | 0.5428  |
| $N = 8$                            | 0.3717             | 0.2538              | 0.3100 | 0.3740 | 0.2543 | 0.6557  | 0.8622  | 0.8536  |
| $N = 16$                           | 0.2801             | 0.1366              | 0.2497 | 0.2786 | 0.1375 | -0.7571 | 0.9954  | 0.9954  |
| $N = 32$                           | 0.2388             | 0.0832              | 0.2278 | 0.2396 | 0.0843 | 0.7147  | 1.0000  | 1.0000  |
| $N = 64$                           | 0.2191             | 0.0544              | 0.2124 | 0.2181 | 0.0540 | -1.2282 | 1.0000  | 1.0000  |
| $N = 128$                          | 0.2095             | 0.0369              | 0.2071 | 0.2092 | 0.0363 | -0.4385 | 1.0000  | 1.0000  |
| $N = 256$                          | 0.2047             | 0.0256              | 0.2042 | 0.2050 | 0.0255 | 0.7656  | 1.0000  | 1.0000  |
| $p = 1024, q = 2, V(\Sigma) = 0.4$ |                    |                     |        |        |        |         |         |         |
| $N = 4$                            | 0.8671             | 1.0439              | 0.5247 | 0.8745 | 1.0769 | 0.4858  | 0.6186  | 0.6108  |
| $N = 8$                            | 0.6002             | 0.4691              | 0.4631 | 0.5869 | 0.4547 | -2.0640 | 0.9268  | 0.9202  |
| $N = 16$                           | 0.4934             | 0.2605              | 0.4428 | 0.4976 | 0.2683 | 1.0984  | 0.9992  | 0.9990  |
| $N = 32$                           | 0.4452             | 0.1620              | 0.4194 | 0.4427 | 0.1615 | -1.0754 | 1.0000  | 1.0000  |
| $N = 64$                           | 0.4222             | 0.1072              | 0.4127 | 0.4236 | 0.1082 | 0.8702  | 1.0000  | 1.0000  |
| $N = 128$                          | 0.4110             | 0.0732              | 0.4088 | 0.4135 | 0.0733 | 2.4063  | 1.0000  | 1.0000  |
| $N = 256$                          | 0.4055             | 0.0509              | 0.4024 | 0.4058 | 0.0506 | 0.3761  | 1.0000  | 1.0000  |
| $p = 1024, q = 4, V(\Sigma) = 0.1$ |                    |                     |        |        |        |         |         |         |
| $N = 4$                            | 0.4673             | 0.2966              | 0.3913 | 0.4672 | 0.2960 | -0.0035 | 0.5506  | 0.5286  |
| $N = 8$                            | 0.2574             | 0.1153              | 0.2361 | 0.2596 | 0.1170 | 1.3608  | 0.8494  | 0.8328  |
| $N = 16$                           | 0.1735             | 0.0567              | 0.1645 | 0.1741 | 0.0584 | 0.8447  | 0.9966  | 0.9960  |
| $N = 32$                           | 0.1355             | 0.0324              | 0.1313 | 0.1349 | 0.0329 | -1.2922 | 1.0000  | 1.0000  |
| $N = 64$                           | 0.1175             | 0.0203              | 0.1157 | 0.1168 | 0.0200 | -2.4767 | 1.0000  | 1.0000  |
| $N = 128$                          | 0.1087             | 0.0134              | 0.1082 | 0.1088 | 0.0136 | 0.8393  | 1.0000  | 1.0000  |
| $N = 256$                          | 0.1043             | 0.0092              | 0.1040 | 0.1043 | 0.0090 | 0.1824  | 1.0000  | 1.0000  |
| $p = 1024, q = 4, V(\Sigma) = 0.2$ |                    |                     |        |        |        |         |         |         |
| $N = 4$                            | 0.6005             | 0.4964              | 0.4682 | 0.5980 | 0.4856 | -0.3698 | 0.6212  | 0.6076  |
| $N = 8$                            | 0.3717             | 0.2033              | 0.3306 | 0.3706 | 0.2005 | -0.3631 | 0.9174  | 0.9120  |
| $N = 16$                           | 0.2801             | 0.1046              | 0.2681 | 0.2846 | 0.1044 | 3.0183  | 1.0000  | 1.0000  |
| $N = 32$                           | 0.2388             | 0.0616              | 0.2315 | 0.2376 | 0.0602 | -1.3527 | 1.0000  | 1.0000  |
| $N = 64$                           | 0.2191             | 0.0394              | 0.2156 | 0.2182 | 0.0389 | -1.6629 | 1.0000  | 1.0000  |
| $N = 128$                          | 0.2095             | 0.0264              | 0.2076 | 0.2089 | 0.0261 | -1.5712 | 1.0000  | 1.0000  |
| $N = 256$                          | 0.2047             | 0.0182              | 0.2038 | 0.2045 | 0.0181 | -0.9541 | 1.0000  | 1.0000  |

(continued)

**Table S1.** (continued)

|                                                                   | $E[V(\mathbf{S})]$ | $SD[V(\mathbf{S})]$ | Median | Mean   | ESD    | $T$     | Pow. 5% | Pow. 1% |
|-------------------------------------------------------------------|--------------------|---------------------|--------|--------|--------|---------|---------|---------|
| $p = 2$ , linearly decreasing $\lambda$ ( $V(\Sigma) = 0.1111$ )  |                    |                     |        |        |        |         |         |         |
| $N = 4$                                                           | 0.7778             | 1.3168              | 0.3244 | 0.7933 | 1.3342 | 0.8238  | 0.0708  | 0.0190  |
| $N = 8$                                                           | 0.3968             | 0.5318              | 0.2164 | 0.3997 | 0.5313 | 0.3812  | 0.1042  | 0.0328  |
| $N = 16$                                                          | 0.2444             | 0.2693              | 0.1575 | 0.2433 | 0.2687 | -0.2967 | 0.1820  | 0.0676  |
| $N = 32$                                                          | 0.1756             | 0.1565              | 0.1352 | 0.1795 | 0.1599 | 1.7054  | 0.3436  | 0.1446  |
| $N = 64$                                                          | 0.1429             | 0.0992              | 0.1232 | 0.1434 | 0.1000 | 0.4129  | 0.6262  | 0.4204  |
| $N = 128$                                                         | 0.1269             | 0.0661              | 0.1169 | 0.1281 | 0.0676 | 1.3481  | 0.9248  | 0.8128  |
| $N = 256$                                                         | 0.1190             | 0.0453              | 0.1140 | 0.1192 | 0.0455 | 0.4317  | 0.9980  | 0.9892  |
| $p = 4$ , linearly decreasing $\lambda$ ( $V(\Sigma) = 0.0667$ )  |                    |                     |        |        |        |         |         |         |
| $N = 4$                                                           | 0.5778             | 0.6569              | 0.3679 | 0.5751 | 0.6531 | -0.2908 | 0.0824  | 0.0210  |
| $N = 8$                                                           | 0.2857             | 0.2434              | 0.2159 | 0.2877 | 0.2528 | 0.5523  | 0.1362  | 0.0496  |
| $N = 16$                                                          | 0.1689             | 0.1133              | 0.1381 | 0.1670 | 0.1128 | -1.1736 | 0.2488  | 0.0998  |
| $N = 32$                                                          | 0.1161             | 0.0613              | 0.1008 | 0.1140 | 0.0603 | -2.5412 | 0.5314  | 0.2710  |
| $N = 64$                                                          | 0.0910             | 0.0369              | 0.0855 | 0.0917 | 0.0374 | 1.2880  | 0.9250  | 0.8034  |
| $N = 128$                                                         | 0.0787             | 0.0238              | 0.0754 | 0.0786 | 0.0239 | -0.5522 | 1.0000  | 0.9984  |
| $N = 256$                                                         | 0.0727             | 0.0160              | 0.0717 | 0.0729 | 0.0160 | 0.7927  | 1.0000  | 1.0000  |
| $p = 8$ , linearly decreasing $\lambda$ ( $V(\Sigma) = 0.0370$ )  |                    |                     |        |        |        |         |         |         |
| $N = 4$                                                           | 0.4630             | 0.3521              | 0.3683 | 0.4628 | 0.3535 | -0.0264 | 0.0898  | 0.0322  |
| $N = 8$                                                           | 0.2196             | 0.1211              | 0.1903 | 0.2180 | 0.1228 | -0.8922 | 0.1508  | 0.0504  |
| $N = 16$                                                          | 0.1222             | 0.0520              | 0.1125 | 0.1220 | 0.0520 | -0.2921 | 0.3076  | 0.1458  |
| $N = 32$                                                          | 0.0783             | 0.0261              | 0.0748 | 0.0785 | 0.0264 | 0.6822  | 0.6982  | 0.4684  |
| $N = 64$                                                          | 0.0573             | 0.0148              | 0.0558 | 0.0574 | 0.0148 | 0.4841  | 0.9930  | 0.9622  |
| $N = 128$                                                         | 0.0471             | 0.0091              | 0.0461 | 0.0469 | 0.0090 | -1.5428 | 1.0000  | 1.0000  |
| $N = 256$                                                         | 0.0420             | 0.0060              | 0.0416 | 0.0421 | 0.0060 | 1.1109  | 1.0000  | 1.0000  |
| $p = 16$ , linearly decreasing $\lambda$ ( $V(\Sigma) = 0.0196$ ) |                    |                     |        |        |        |         |         |         |
| $N = 4$                                                           | 0.4003             | 0.2049              | 0.3565 | 0.4022 | 0.2110 | 0.6379  | 0.0916  | 0.0268  |
| $N = 8$                                                           | 0.1828             | 0.0658              | 0.1722 | 0.1821 | 0.0656 | -0.6784 | 0.1430  | 0.0518  |
| $N = 16$                                                          | 0.0958             | 0.0260              | 0.0936 | 0.0964 | 0.0263 | 1.8197  | 0.3258  | 0.1462  |
| $N = 32$                                                          | 0.0565             | 0.0120              | 0.0552 | 0.0564 | 0.0121 | -0.0814 | 0.7550  | 0.5230  |
| $N = 64$                                                          | 0.0377             | 0.0063              | 0.0373 | 0.0378 | 0.0064 | 0.4353  | 0.9976  | 0.9880  |
| $N = 128$                                                         | 0.0286             | 0.0036              | 0.0284 | 0.0286 | 0.0037 | -0.5174 | 1.0000  | 1.0000  |
| $N = 256$                                                         | 0.0241             | 0.0023              | 0.0240 | 0.0241 | 0.0022 | 0.9463  | 1.0000  | 1.0000  |
| $p = 32$ , linearly decreasing $\lambda$ ( $V(\Sigma) = 0.0101$ ) |                    |                     |        |        |        |         |         |         |
| $N = 4$                                                           | 0.3674             | 0.1284              | 0.3498 | 0.3676 | 0.1275 | 0.0762  | 0.0890  | 0.0322  |
| $N = 8$                                                           | 0.1632             | 0.0391              | 0.1574 | 0.1611 | 0.0386 | -3.8961 | 0.1182  | 0.0470  |
| $N = 16$                                                          | 0.0816             | 0.0143              | 0.0803 | 0.0814 | 0.0141 | -0.7872 | 0.2772  | 0.1328  |
| $N = 32$                                                          | 0.0447             | 0.0060              | 0.0443 | 0.0447 | 0.0061 | 0.2237  | 0.7446  | 0.5416  |
| $N = 64$                                                          | 0.0271             | 0.0029              | 0.0270 | 0.0271 | 0.0029 | 0.3384  | 0.9986  | 0.9954  |
| $N = 128$                                                         | 0.0185             | 0.0015              | 0.0185 | 0.0185 | 0.0015 | 0.2761  | 1.0000  | 1.0000  |
| $N = 256$                                                         | 0.0143             | 0.0009              | 0.0143 | 0.0143 | 0.0009 | 0.0449  | 1.0000  | 1.0000  |

(continued)

**Table S1.** (continued)

|                                                                     | $E[V(\mathbf{S})]$ | $SD[V(\mathbf{S})]$ | Median | Mean   | ESD     | $T$     | Pow. 5% | Pow. 1% |
|---------------------------------------------------------------------|--------------------|---------------------|--------|--------|---------|---------|---------|---------|
| $p = 64$ , linearly decreasing $\lambda$ ( $V(\Sigma) = 0.0051$ )   |                    |                     |        |        |         |         |         |         |
| $N = 4$                                                             | 0.3505             | 0.08474             | 0.3397 | 0.3483 | 0.08321 | -1.8765 | 0.0926  | 0.0218  |
| $N = 8$                                                             | 0.1532             | 0.02489             | 0.1512 | 0.1531 | 0.02482 | -0.1999 | 0.1152  | 0.0330  |
| $N = 16$                                                            | 0.0742             | 0.00863             | 0.0738 | 0.0743 | 0.00855 | 0.5331  | 0.2424  | 0.0954  |
| $N = 32$                                                            | 0.0386             | 0.00335             | 0.0384 | 0.0386 | 0.00337 | 0.1913  | 0.6256  | 0.4168  |
| $N = 64$                                                            | 0.0216             | 0.00145             | 0.0215 | 0.0216 | 0.00144 | 0.5035  | 0.9970  | 0.9890  |
| $N = 128$                                                           | 0.0133             | 0.00070             | 0.0133 | 0.0133 | 0.00071 | -0.1560 | 1.0000  | 1.0000  |
| $N = 256$                                                           | 0.0092             | 0.00038             | 0.0092 | 0.0092 | 0.00037 | -2.0535 | 1.0000  | 1.0000  |
| $p = 128$ , linearly decreasing $\lambda$ ( $V(\Sigma) = 0.0026$ )  |                    |                     |        |        |         |         |         |         |
| $N = 4$                                                             | 0.3420             | 0.05775             | 0.3379 | 0.3416 | 0.05769 | -0.4209 | 0.0894  | 0.0274  |
| $N = 8$                                                             | 0.1480             | 0.01660             | 0.1471 | 0.1478 | 0.01665 | -0.8164 | 0.1096  | 0.0346  |
| $N = 16$                                                            | 0.0705             | 0.00554             | 0.0704 | 0.0705 | 0.00558 | -0.0138 | 0.1858  | 0.0718  |
| $N = 32$                                                            | 0.0354             | 0.00203             | 0.0354 | 0.0354 | 0.00203 | 0.4273  | 0.4964  | 0.2800  |
| $N = 64$                                                            | 0.0187             | 0.00081             | 0.0187 | 0.0188 | 0.00081 | 0.6380  | 0.9844  | 0.9502  |
| $N = 128$                                                           | 0.0106             | 0.00036             | 0.0106 | 0.0106 | 0.00035 | 0.2818  | 1.0000  | 1.0000  |
| $N = 256$                                                           | 0.0066             | 0.00017             | 0.0066 | 0.0066 | 0.00017 | 1.8720  | 1.0000  | 1.0000  |
| $p = 256$ , linearly decreasing $\lambda$ ( $V(\Sigma) = 0.0013$ )  |                    |                     |        |        |         |         |         |         |
| $N = 4$                                                             | 0.3377             | 0.04006             | 0.3359 | 0.3382 | 0.04042 | 0.8696  | 0.0924  | 0.0236  |
| $N = 8$                                                             | 0.1455             | 0.01138             | 0.1452 | 0.1455 | 0.01124 | 0.4174  | 0.0908  | 0.0208  |
| $N = 16$                                                            | 0.0686             | 0.00372             | 0.0685 | 0.0686 | 0.00372 | 0.2241  | 0.1694  | 0.0666  |
| $N = 32$                                                            | 0.0338             | 0.00131             | 0.0338 | 0.0338 | 0.00131 | -0.6163 | 0.3578  | 0.1798  |
| $N = 64$                                                            | 0.0173             | 0.00049             | 0.0173 | 0.0173 | 0.00050 | 1.3107  | 0.9134  | 0.7978  |
| $N = 128$                                                           | 0.0092             | 0.00020             | 0.0092 | 0.0092 | 0.00020 | -0.1534 | 1.0000  | 1.0000  |
| $N = 256$                                                           | 0.0053             | 0.00009             | 0.0053 | 0.0053 | 0.00009 | -0.1959 | 1.0000  | 1.0000  |
| $p = 1024$ , linearly decreasing $\lambda$ ( $V(\Sigma) = 0.0003$ ) |                    |                     |        |        |         |         |         |         |
| $N = 4$                                                             | 0.3344             | 0.01974             | 0.3339 | 0.3345 | 0.01985 | 0.2764  | 0.0848  | 0.0270  |
| $N = 8$                                                             | 0.1435             | 0.00556             | 0.1434 | 0.1435 | 0.00552 | -0.5480 | 0.0880  | 0.0190  |
| $N = 16$                                                            | 0.0671             | 0.00178             | 0.0671 | 0.0671 | 0.00178 | -0.0478 | 0.1052  | 0.0338  |
| $N = 32$                                                            | 0.0327             | 0.00061             | 0.0327 | 0.0327 | 0.00062 | 0.5148  | 0.2036  | 0.0790  |
| $N = 64$                                                            | 0.0162             | 0.00021             | 0.0162 | 0.0162 | 0.00021 | 0.3321  | 0.5512  | 0.3070  |
| $N = 128$                                                           | 0.0082             | 0.00008             | 0.0082 | 0.0082 | 0.00008 | 1.8861  | 0.9988  | 0.9906  |
| $N = 256$                                                           | 0.0043             | 0.00003             | 0.0043 | 0.0043 | 0.00003 | 0.8650  | 1.0000  | 1.0000  |

(continued)

**Table S1.** (continued)

|                                                                        | $E[V(\mathbf{S})]$ | $SD[V(\mathbf{S})]$ | Median | Mean   | ESD    | $T$     | Pow. 5% | Pow. 1% |
|------------------------------------------------------------------------|--------------------|---------------------|--------|--------|--------|---------|---------|---------|
| $p = 2$ , quadratically decreasing $\lambda$ ( $V(\Sigma) = 0.3600$ )  |                    |                     |        |        |        |         |         |         |
| $N = 4$                                                                | 1.0267             | 1.8585              | 0.3865 | 0.9886 | 1.7577 | -1.5298 | 0.1000  | 0.0320  |
| $N = 8$                                                                | 0.6457             | 0.8290              | 0.3649 | 0.6528 | 0.8393 | 0.5941  | 0.2108  | 0.0958  |
| $N = 16$                                                               | 0.4933             | 0.4583              | 0.3551 | 0.4902 | 0.4570 | -0.4788 | 0.4410  | 0.2418  |
| $N = 32$                                                               | 0.4245             | 0.2842              | 0.3563 | 0.4239 | 0.2886 | -0.1479 | 0.7944  | 0.5390  |
| $N = 64$                                                               | 0.3917             | 0.1877              | 0.3601 | 0.3932 | 0.1889 | 0.5256  | 0.9884  | 0.9542  |
| $N = 128$                                                              | 0.3757             | 0.1282              | 0.3611 | 0.3769 | 0.1279 | 0.6613  | 1.0000  | 0.9998  |
| $N = 256$                                                              | 0.3678             | 0.0890              | 0.3567 | 0.3669 | 0.0896 | -0.7454 | 1.0000  | 1.0000  |
| $p = 4$ , quadratically decreasing $\lambda$ ( $V(\Sigma) = 0.1911$ )  |                    |                     |        |        |        |         |         |         |
| $N = 4$                                                                | 0.7230             | 0.9730              | 0.4085 | 0.7294 | 0.9809 | 0.4633  | 0.1306  | 0.0548  |
| $N = 8$                                                                | 0.4190             | 0.4031              | 0.3059 | 0.4178 | 0.3900 | -0.2228 | 0.2756  | 0.1264  |
| $N = 16$                                                               | 0.2975             | 0.2094              | 0.2416 | 0.2960 | 0.2056 | -0.5254 | 0.5702  | 0.3578  |
| $N = 32$                                                               | 0.2426             | 0.1242              | 0.2203 | 0.2436 | 0.1233 | 0.5682  | 0.9398  | 0.8156  |
| $N = 64$                                                               | 0.2164             | 0.0798              | 0.2046 | 0.2155 | 0.0785 | -0.8868 | 1.0000  | 0.9996  |
| $N = 128$                                                              | 0.2037             | 0.0537              | 0.1980 | 0.2042 | 0.0534 | 0.6874  | 1.0000  | 1.0000  |
| $N = 256$                                                              | 0.1974             | 0.0370              | 0.1945 | 0.1974 | 0.0368 | 0.1120  | 1.0000  | 1.0000  |
| $p = 8$ , quadratically decreasing $\lambda$ ( $V(\Sigma) = 0.0980$ )  |                    |                     |        |        |        |         |         |         |
| $N = 4$                                                                | 0.5392             | 0.4970              | 0.3844 | 0.5303 | 0.4841 | -1.3072 | 0.1458  | 0.0692  |
| $N = 8$                                                                | 0.2871             | 0.1893              | 0.2402 | 0.2887 | 0.1957 | 0.5796  | 0.3016  | 0.1590  |
| $N = 16$                                                               | 0.1863             | 0.0910              | 0.1663 | 0.1856 | 0.0920 | -0.5266 | 0.6552  | 0.4694  |
| $N = 32$                                                               | 0.1407             | 0.0508              | 0.1312 | 0.1399 | 0.0506 | -1.1144 | 0.9838  | 0.9450  |
| $N = 64$                                                               | 0.1190             | 0.0313              | 0.1150 | 0.1190 | 0.0317 | -0.1024 | 1.0000  | 1.0000  |
| $N = 128$                                                              | 0.1085             | 0.0205              | 0.1064 | 0.1085 | 0.0206 | -0.0111 | 1.0000  | 1.0000  |
| $N = 256$                                                              | 0.1032             | 0.0139              | 0.1020 | 0.1030 | 0.0140 | -0.9112 | 1.0000  | 1.0000  |
| $p = 16$ , quadratically decreasing $\lambda$ ( $V(\Sigma) = 0.0496$ ) |                    |                     |        |        |        |         |         |         |
| $N = 4$                                                                | 0.4390             | 0.2711              | 0.3719 | 0.4354 | 0.2697 | -0.9575 | 0.1392  | 0.0572  |
| $N = 8$                                                                | 0.2165             | 0.0946              | 0.1975 | 0.2151 | 0.0922 | -1.0611 | 0.2892  | 0.1544  |
| $N = 16$                                                               | 0.1274             | 0.0415              | 0.1209 | 0.1270 | 0.0412 | -0.8072 | 0.6622  | 0.4782  |
| $N = 32$                                                               | 0.0872             | 0.0213              | 0.0847 | 0.0874 | 0.0217 | 0.5232  | 0.9916  | 0.9652  |
| $N = 64$                                                               | 0.0681             | 0.0123              | 0.0670 | 0.0682 | 0.0124 | 0.6871  | 1.0000  | 1.0000  |
| $N = 128$                                                              | 0.0588             | 0.0078              | 0.0580 | 0.0586 | 0.0077 | -1.3435 | 1.0000  | 1.0000  |
| $N = 256$                                                              | 0.0541             | 0.0052              | 0.0540 | 0.0542 | 0.0052 | 1.1584  | 1.0000  | 1.0000  |
| $p = 32$ , quadratically decreasing $\lambda$ ( $V(\Sigma) = 0.0249$ ) |                    |                     |        |        |        |         |         |         |
| $N = 4$                                                                | 0.3868             | 0.1611              | 0.3537 | 0.3840 | 0.1566 | -1.2819 | 0.1400  | 0.0626  |
| $N = 8$                                                                | 0.1800             | 0.0520              | 0.1740 | 0.1803 | 0.0518 | 0.3846  | 0.2702  | 0.1556  |
| $N = 16$                                                               | 0.0973             | 0.0207              | 0.0950 | 0.0971 | 0.0207 | -0.7694 | 0.6166  | 0.4606  |
| $N = 32$                                                               | 0.0599             | 0.0097              | 0.0594 | 0.0601 | 0.0099 | 0.9872  | 0.9894  | 0.9688  |
| $N = 64$                                                               | 0.0421             | 0.0051              | 0.0418 | 0.0421 | 0.0051 | 0.0932  | 1.0000  | 1.0000  |
| $N = 128$                                                              | 0.0334             | 0.0030              | 0.0333 | 0.0334 | 0.0031 | -0.4273 | 1.0000  | 1.0000  |
| $N = 256$                                                              | 0.0292             | 0.0019              | 0.0291 | 0.0292 | 0.0019 | 1.2425  | 1.0000  | 1.0000  |

(continued)

**Table S1.** (continued)

|                                                                          | $E[V(\mathbf{S})]$ | $SD[V(\mathbf{S})]$ | Median | Mean   | ESD     | $T$     | Pow. 5% | Pow. 1% |
|--------------------------------------------------------------------------|--------------------|---------------------|--------|--------|---------|---------|---------|---------|
| $p = 64$ , quadratically decreasing $\lambda$ ( $V(\Sigma) = 0.0125$ )   |                    |                     |        |        |         |         |         |         |
| $N = 4$                                                                  | 0.3603             | 0.10274             | 0.3469 | 0.3599 | 0.10569 | -0.2366 | 0.1464  | 0.0638  |
| $N = 8$                                                                  | 0.1615             | 0.03129             | 0.1581 | 0.1616 | 0.03125 | 0.2612  | 0.2324  | 0.1032  |
| $N = 16$                                                                 | 0.0820             | 0.01150             | 0.0815 | 0.0826 | 0.01166 | 3.4198  | 0.5504  | 0.3684  |
| $N = 32$                                                                 | 0.0461             | 0.00486             | 0.0458 | 0.0460 | 0.00484 | -1.3132 | 0.9774  | 0.9342  |
| $N = 64$                                                                 | 0.0290             | 0.00233             | 0.0290 | 0.0291 | 0.00236 | 1.9871  | 1.0000  | 1.0000  |
| $N = 128$                                                                | 0.0207             | 0.00126             | 0.0206 | 0.0207 | 0.00126 | -2.1347 | 1.0000  | 1.0000  |
| $N = 256$                                                                | 0.0166             | 0.00075             | 0.0165 | 0.0166 | 0.00075 | 0.4776  | 1.0000  | 1.0000  |
| $p = 128$ , quadratically decreasing $\lambda$ ( $V(\Sigma) = 0.0062$ )  |                    |                     |        |        |         |         |         |         |
| $N = 4$                                                                  | 0.3468             | 0.06862             | 0.3414 | 0.3476 | 0.06800 | 0.8011  | 0.1350  | 0.0620  |
| $N = 8$                                                                  | 0.1522             | 0.02014             | 0.1508 | 0.1520 | 0.02010 | -0.6510 | 0.2016  | 0.0944  |
| $N = 16$                                                                 | 0.0744             | 0.00697             | 0.0738 | 0.0742 | 0.00692 | -1.6078 | 0.4236  | 0.2468  |
| $N = 32$                                                                 | 0.0392             | 0.00271             | 0.0392 | 0.0392 | 0.00272 | 0.1739  | 0.9186  | 0.8312  |
| $N = 64$                                                                 | 0.0225             | 0.00118             | 0.0224 | 0.0224 | 0.00118 | -1.0233 | 1.0000  | 1.0000  |
| $N = 128$                                                                | 0.0143             | 0.00057             | 0.0143 | 0.0143 | 0.00058 | 0.4957  | 1.0000  | 1.0000  |
| $N = 256$                                                                | 0.0103             | 0.00031             | 0.0102 | 0.0102 | 0.00032 | -0.7049 | 1.0000  | 1.0000  |
| $p = 256$ , quadratically decreasing $\lambda$ ( $V(\Sigma) = 0.0031$ )  |                    |                     |        |        |         |         |         |         |
| $N = 4$                                                                  | 0.3401             | 0.04709             | 0.3378 | 0.3400 | 0.04713 | -0.1581 | 0.1338  | 0.0460  |
| $N = 8$                                                                  | 0.1475             | 0.01353             | 0.1469 | 0.1474 | 0.01375 | -0.7367 | 0.1654  | 0.0648  |
| $N = 16$                                                                 | 0.0705             | 0.00451             | 0.0703 | 0.0705 | 0.00454 | -0.5367 | 0.3418  | 0.1896  |
| $N = 32$                                                                 | 0.0357             | 0.00165             | 0.0357 | 0.0357 | 0.00164 | -0.2453 | 0.8128  | 0.6602  |
| $N = 64$                                                                 | 0.0192             | 0.00066             | 0.0191 | 0.0191 | 0.00066 | -2.5120 | 1.0000  | 1.0000  |
| $N = 128$                                                                | 0.0111             | 0.00029             | 0.0111 | 0.0111 | 0.00029 | -3.0020 | 1.0000  | 1.0000  |
| $N = 256$                                                                | 0.0071             | 0.00014             | 0.0071 | 0.0071 | 0.00014 | -1.4241 | 1.0000  | 1.0000  |
| $p = 1024$ , quadratically decreasing $\lambda$ ( $V(\Sigma) = 0.0008$ ) |                    |                     |        |        |         |         |         |         |
| $N = 4$                                                                  | 0.3350             | 0.02300             | 0.3346 | 0.3352 | 0.02282 | 0.4279  | 0.1146  | 0.0486  |
| $N = 8$                                                                  | 0.1440             | 0.00649             | 0.1439 | 0.1440 | 0.00650 | -0.0425 | 0.1416  | 0.0490  |
| $N = 16$                                                                 | 0.0676             | 0.00210             | 0.0676 | 0.0677 | 0.00210 | 0.8367  | 0.2058  | 0.0988  |
| $N = 32$                                                                 | 0.0331             | 0.00072             | 0.0331 | 0.0331 | 0.00071 | 0.7721  | 0.4686  | 0.2736  |
| $N = 64$                                                                 | 0.0167             | 0.00026             | 0.0167 | 0.0167 | 0.00027 | -1.3843 | 0.9656  | 0.9110  |
| $N = 128$                                                                | 0.0087             | 0.00010             | 0.0087 | 0.0087 | 0.00010 | -1.8267 | 1.0000  | 1.0000  |
| $N = 256$                                                                | 0.0047             | 0.00004             | 0.0047 | 0.0047 | 0.00004 | 0.4628  | 1.0000  | 1.0000  |

**Table S2.** Summary statistics of simulation results for  $V_{\text{rel}}(\mathbf{S})$ . Theoretical expectation ( $E[V_{\text{rel}}(\mathbf{S})]$ ) and standard deviation ( $\text{SD}[V_{\text{rel}}(\mathbf{S})]$ ; approximate results are shown for these in non-null conditions), as well as empirical median, mean, standard deviation (ESD), bias in standard error unit ( $T$ ), and critical points or power (for null and non-null conditions, respectively) at  $\alpha = 0.05$  and  $0.01$  (CP/Pow. 5% and 1%) from 5000 simulation runs are shown. See Table S1 for further information.

|                                               | $E[V_{\text{rel}}(\mathbf{S})]$ | $\text{SD}[V_{\text{rel}}(\mathbf{S})]$ | Median | Mean   | ESD    | $T$     | CP 5%  | CP 1%  |
|-----------------------------------------------|---------------------------------|-----------------------------------------|--------|--------|--------|---------|--------|--------|
| $p = 2, V_{\text{rel}}(\mathbf{\Sigma}) = 0$  |                                 |                                         |        |        |        |         |        |        |
| $N = 4$                                       | 0.5000                          | 0.2887                                  | 0.5073 | 0.5039 | 0.2885 | 0.9603  | 0.9500 | 0.9897 |
| $N = 8$                                       | 0.2500                          | 0.1936                                  | 0.2079 | 0.2514 | 0.1924 | 0.4961  | 0.6335 | 0.7686 |
| $N = 16$                                      | 0.1250                          | 0.1102                                  | 0.0953 | 0.1259 | 0.1098 | 0.6000  | 0.3454 | 0.4862 |
| $N = 32$                                      | 0.0625                          | 0.0587                                  | 0.0448 | 0.0628 | 0.0597 | 0.3234  | 0.1830 | 0.2744 |
| $N = 64$                                      | 0.0313                          | 0.0303                                  | 0.0224 | 0.0309 | 0.0289 | -0.8301 | 0.0893 | 0.1266 |
| $N = 128$                                     | 0.0156                          | 0.0154                                  | 0.0109 | 0.0154 | 0.0149 | -1.1474 | 0.0455 | 0.0646 |
| $N = 256$                                     | 0.0078                          | 0.0078                                  | 0.0055 | 0.0079 | 0.0078 | 0.5516  | 0.0232 | 0.0351 |
| $p = 4, V_{\text{rel}}(\mathbf{\Sigma}) = 0$  |                                 |                                         |        |        |        |         |        |        |
| $N = 4$                                       | 0.4286                          | 0.1506                                  | 0.4028 | 0.4293 | 0.1509 | 0.3344  | 0.7168 | 0.8275 |
| $N = 8$                                       | 0.2000                          | 0.0840                                  | 0.1856 | 0.2002 | 0.0858 | 0.1644  | 0.3641 | 0.4610 |
| $N = 16$                                      | 0.0968                          | 0.0433                                  | 0.0907 | 0.0968 | 0.0434 | 0.0620  | 0.1774 | 0.2307 |
| $N = 32$                                      | 0.0476                          | 0.0219                                  | 0.0438 | 0.0474 | 0.0221 | -0.6146 | 0.0885 | 0.1159 |
| $N = 64$                                      | 0.0236                          | 0.0110                                  | 0.0218 | 0.0237 | 0.0110 | 0.6544  | 0.0442 | 0.0558 |
| $N = 128$                                     | 0.0118                          | 0.0055                                  | 0.0109 | 0.0118 | 0.0056 | 0.1782  | 0.0225 | 0.0287 |
| $N = 256$                                     | 0.0059                          | 0.0028                                  | 0.0054 | 0.0058 | 0.0027 | -1.1927 | 0.0107 | 0.0138 |
| $p = 8, V_{\text{rel}}(\mathbf{\Sigma}) = 0$  |                                 |                                         |        |        |        |         |        |        |
| $N = 4$                                       | 0.3846                          | 0.0803                                  | 0.3732 | 0.3863 | 0.0811 | 1.5112  | 0.5406 | 0.6279 |
| $N = 8$                                       | 0.1724                          | 0.0397                                  | 0.1685 | 0.1725 | 0.0390 | 0.2005  | 0.2434 | 0.2820 |
| $N = 16$                                      | 0.0820                          | 0.0193                                  | 0.0802 | 0.0821 | 0.0190 | 0.5489  | 0.1163 | 0.1340 |
| $N = 32$                                      | 0.0400                          | 0.0095                                  | 0.0390 | 0.0401 | 0.0096 | 0.7661  | 0.0574 | 0.0668 |
| $N = 64$                                      | 0.0198                          | 0.0047                                  | 0.0193 | 0.0198 | 0.0047 | 0.2662  | 0.0281 | 0.0324 |
| $N = 128$                                     | 0.0098                          | 0.0023                                  | 0.0096 | 0.0098 | 0.0024 | -0.4846 | 0.0140 | 0.0163 |
| $N = 256$                                     | 0.0049                          | 0.0012                                  | 0.0048 | 0.0049 | 0.0012 | 1.1240  | 0.0070 | 0.0082 |
| $p = 16, V_{\text{rel}}(\mathbf{\Sigma}) = 0$ |                                 |                                         |        |        |        |         |        |        |
| $N = 4$                                       | 0.3600                          | 0.0418                                  | 0.3532 | 0.3601 | 0.0412 | 0.2428  | 0.4385 | 0.4926 |
| $N = 8$                                       | 0.1579                          | 0.0193                                  | 0.1562 | 0.1580 | 0.0197 | 0.3764  | 0.1934 | 0.2135 |
| $N = 16$                                      | 0.0744                          | 0.0091                                  | 0.0738 | 0.0746 | 0.0094 | 1.4158  | 0.0911 | 0.0991 |
| $N = 32$                                      | 0.0361                          | 0.0044                                  | 0.0357 | 0.0361 | 0.0044 | -1.2604 | 0.0439 | 0.0477 |
| $N = 64$                                      | 0.0178                          | 0.0022                                  | 0.0177 | 0.0178 | 0.0022 | 0.4338  | 0.0215 | 0.0234 |
| $N = 128$                                     | 0.0088                          | 0.0011                                  | 0.0088 | 0.0088 | 0.0011 | -1.2039 | 0.0107 | 0.0116 |
| $N = 256$                                     | 0.0044                          | 0.0005                                  | 0.0044 | 0.0044 | 0.0005 | 1.8858  | 0.0053 | 0.0058 |
| $p = 32, V_{\text{rel}}(\mathbf{\Sigma}) = 0$ |                                 |                                         |        |        |        |         |        |        |
| $N = 4$                                       | 0.3469                          | 0.0214                                  | 0.3429 | 0.3468 | 0.0212 | -0.4007 | 0.3872 | 0.4132 |
| $N = 8$                                       | 0.1504                          | 0.0095                                  | 0.1492 | 0.1503 | 0.0096 | -0.8935 | 0.1680 | 0.1777 |
| $N = 16$                                      | 0.0705                          | 0.0044                                  | 0.0701 | 0.0704 | 0.0044 | -1.6332 | 0.0780 | 0.0823 |
| $N = 32$                                      | 0.0342                          | 0.0021                                  | 0.0341 | 0.0342 | 0.0021 | -0.7810 | 0.0378 | 0.0397 |
| $N = 64$                                      | 0.0168                          | 0.0010                                  | 0.0168 | 0.0168 | 0.0010 | -0.7681 | 0.0186 | 0.0195 |
| $N = 128$                                     | 0.0084                          | 0.0005                                  | 0.0083 | 0.0084 | 0.0005 | 0.0999  | 0.0093 | 0.0096 |
| $N = 256$                                     | 0.0042                          | 0.0003                                  | 0.0042 | 0.0042 | 0.0003 | 0.1845  | 0.0046 | 0.0048 |

(continued)



**Table S2.** (continued)

|                                                     | $E[V_{\text{rel}}(\mathbf{S})]$ | $SD[V_{\text{rel}}(\mathbf{S})]$ | Median | Mean   | ESD     | $T$     | CP 5%  | CP 1%  |
|-----------------------------------------------------|---------------------------------|----------------------------------|--------|--------|---------|---------|--------|--------|
| $p = 64, V_{\text{rel}}(\boldsymbol{\Sigma}) = 0$   |                                 |                                  |        |        |         |         |        |        |
| $N = 4$                                             | 0.3402                          | 0.01084                          | 0.3381 | 0.3403 | 0.01099 | 0.3923  | 0.3616 | 0.3763 |
| $N = 8$                                             | 0.1467                          | 0.00472                          | 0.1462 | 0.1466 | 0.00464 | -0.6909 | 0.1549 | 0.1594 |
| $N = 16$                                            | 0.0686                          | 0.00218                          | 0.0685 | 0.0686 | 0.00216 | 0.5618  | 0.0723 | 0.0741 |
| $N = 32$                                            | 0.0332                          | 0.00104                          | 0.0332 | 0.0332 | 0.00106 | 0.0446  | 0.0350 | 0.0359 |
| $N = 64$                                            | 0.0164                          | 0.00051                          | 0.0163 | 0.0164 | 0.00050 | -0.5869 | 0.0172 | 0.0176 |
| $N = 128$                                           | 0.0081                          | 0.00025                          | 0.0081 | 0.0081 | 0.00025 | 0.6710  | 0.0085 | 0.0087 |
| $N = 256$                                           | 0.0040                          | 0.00013                          | 0.0040 | 0.0040 | 0.00013 | 1.8656  | 0.0043 | 0.0044 |
| $p = 128, V_{\text{rel}}(\boldsymbol{\Sigma}) = 0$  |                                 |                                  |        |        |         |         |        |        |
| $N = 4$                                             | 0.3368                          | 0.00545                          | 0.3358 | 0.3368 | 0.00545 | 0.1266  | 0.3471 | 0.3539 |
| $N = 8$                                             | 0.1448                          | 0.00235                          | 0.1446 | 0.1447 | 0.00230 | -0.0173 | 0.1488 | 0.1509 |
| $N = 16$                                            | 0.0676                          | 0.00108                          | 0.0676 | 0.0677 | 0.00107 | 1.4545  | 0.0695 | 0.0704 |
| $N = 32$                                            | 0.0327                          | 0.00052                          | 0.0327 | 0.0327 | 0.00052 | -0.7481 | 0.0336 | 0.0340 |
| $N = 64$                                            | 0.0161                          | 0.00025                          | 0.0161 | 0.0161 | 0.00025 | 0.3608  | 0.0165 | 0.0167 |
| $N = 128$                                           | 0.0080                          | 0.00012                          | 0.0080 | 0.0080 | 0.00012 | 0.8117  | 0.0082 | 0.0083 |
| $N = 256$                                           | 0.0040                          | 0.00006                          | 0.0040 | 0.0040 | 0.00006 | 0.5283  | 0.0041 | 0.0041 |
| $p = 256, V_{\text{rel}}(\boldsymbol{\Sigma}) = 0$  |                                 |                                  |        |        |         |         |        |        |
| $N = 4$                                             | 0.3351                          | 0.00274                          | 0.3345 | 0.3351 | 0.00275 | 0.9603  | 0.3403 | 0.3437 |
| $N = 8$                                             | 0.1438                          | 0.00117                          | 0.1437 | 0.1438 | 0.00118 | 0.4961  | 0.1459 | 0.1472 |
| $N = 16$                                            | 0.0672                          | 0.00054                          | 0.0671 | 0.0672 | 0.00053 | 0.6000  | 0.0681 | 0.0685 |
| $N = 32$                                            | 0.0325                          | 0.00026                          | 0.0325 | 0.0325 | 0.00025 | 0.3234  | 0.0329 | 0.0331 |
| $N = 64$                                            | 0.0160                          | 0.00013                          | 0.0160 | 0.0160 | 0.00013 | -0.8301 | 0.0162 | 0.0163 |
| $N = 128$                                           | 0.0079                          | 0.00006                          | 0.0079 | 0.0079 | 0.00006 | -1.1474 | 0.0080 | 0.0081 |
| $N = 256$                                           | 0.0040                          | 0.00003                          | 0.0040 | 0.0040 | 0.00003 | 0.5516  | 0.0040 | 0.0040 |
| $p = 1024, V_{\text{rel}}(\boldsymbol{\Sigma}) = 0$ |                                 |                                  |        |        |         |         |        |        |
| $N = 4$                                             | 0.3338                          | 0.00069                          | 0.3336 | 0.3338 | 0.00070 | 1.2938  | 0.3351 | 0.3360 |
| $N = 8$                                             | 0.1431                          | 0.00029                          | 0.1431 | 0.1431 | 0.00029 | -0.5105 | 0.1436 | 0.1439 |
| $N = 16$                                            | 0.0668                          | 0.00013                          | 0.0668 | 0.0668 | 0.00013 | 0.0231  | 0.0670 | 0.0671 |
| $N = 32$                                            | 0.0323                          | 0.00006                          | 0.0323 | 0.0323 | 0.00006 | -1.3055 | 0.0324 | 0.0325 |
| $N = 64$                                            | 0.0159                          | 0.00003                          | 0.0159 | 0.0159 | 0.00003 | -0.0022 | 0.0160 | 0.0160 |
| $N = 128$                                           | 0.0079                          | 0.00002                          | 0.0079 | 0.0079 | 0.00002 | 0.3824  | 0.0079 | 0.0079 |
| $N = 256$                                           | 0.0039                          | 0.00001                          | 0.0039 | 0.0039 | 0.00001 | -0.3392 | 0.0039 | 0.0039 |

(continued)

**Table S2.** (continued)

|                                                           | $\approx E[V_{\text{rel}}(\mathbf{S})]$ | $\approx \text{SD}[V_{\text{rel}}(\mathbf{S})]$ | Median | Mean   | ESD    | $T$     | Pow. 5% | Pow. 1% |
|-----------------------------------------------------------|-----------------------------------------|-------------------------------------------------|--------|--------|--------|---------|---------|---------|
| $p = 2, q = 1, V_{\text{rel}}(\boldsymbol{\Sigma}) = 0.1$ |                                         |                                                 |        |        |        |         |         |         |
| $N = 4$                                                   | 0.4469                                  | 0.4633                                          | 0.5363 | 0.5248 | 0.2904 | 18.9688 | 0.0586  | 0.0122  |
| $N = 8$                                                   | 0.2782                                  | 0.2935                                          | 0.2711 | 0.3061 | 0.2126 | 9.2675  | 0.0882  | 0.0254  |
| $N = 16$                                                  | 0.1920                                  | 0.1811                                          | 0.1640 | 0.1932 | 0.1428 | 0.5873  | 0.1592  | 0.0406  |
| $N = 32$                                                  | 0.1469                                  | 0.1157                                          | 0.1328 | 0.1505 | 0.1028 | 2.4955  | 0.3320  | 0.1290  |
| $N = 64$                                                  | 0.1237                                  | 0.0768                                          | 0.1132 | 0.1238 | 0.0710 | 0.0973  | 0.6406  | 0.4366  |
| $N = 128$                                                 | 0.1119                                  | 0.0523                                          | 0.1063 | 0.1112 | 0.0507 | -1.0195 | 0.9184  | 0.8118  |
| $N = 256$                                                 | 0.1060                                  | 0.0363                                          | 0.1051 | 0.1070 | 0.0355 | 2.1216  | 0.9982  | 0.9914  |
| $p = 2, q = 1, V_{\text{rel}}(\boldsymbol{\Sigma}) = 0.2$ |                                         |                                                 |        |        |        |         |         |         |
| $N = 4$                                                   | 0.4290                                  | 0.4462                                          | 0.5869 | 0.5583 | 0.2857 | 31.9985 | 0.0660  | 0.0140  |
| $N = 8$                                                   | 0.3197                                  | 0.3082                                          | 0.3399 | 0.3586 | 0.2254 | 12.1908 | 0.1356  | 0.0464  |
| $N = 16$                                                  | 0.2642                                  | 0.2030                                          | 0.2591 | 0.2743 | 0.1661 | 4.3048  | 0.3274  | 0.1210  |
| $N = 32$                                                  | 0.2335                                  | 0.1359                                          | 0.2264 | 0.2368 | 0.1214 | 1.9558  | 0.6386  | 0.3574  |
| $N = 64$                                                  | 0.2171                                  | 0.0930                                          | 0.2153 | 0.2182 | 0.0883 | 0.9017  | 0.9382  | 0.8402  |
| $N = 128$                                                 | 0.2087                                  | 0.0645                                          | 0.2060 | 0.2088 | 0.0622 | 0.2154  | 0.9994  | 0.9958  |
| $N = 256$                                                 | 0.2044                                  | 0.0452                                          | 0.2041 | 0.2051 | 0.0442 | 1.1662  | 1.0000  | 1.0000  |
| $p = 2, q = 1, V_{\text{rel}}(\boldsymbol{\Sigma}) = 0.4$ |                                         |                                                 |        |        |        |         |         |         |
| $N = 4$                                                   | 0.4756                                  | 0.3691                                          | 0.6779 | 0.6252 | 0.2745 | 38.5387 | 0.0958  | 0.0184  |
| $N = 8$                                                   | 0.4377                                  | 0.2825                                          | 0.4939 | 0.4804 | 0.2334 | 12.9356 | 0.2916  | 0.1148  |
| $N = 16$                                                  | 0.4232                                  | 0.1982                                          | 0.4457 | 0.4384 | 0.1764 | 6.0670  | 0.6988  | 0.4114  |
| $N = 32$                                                  | 0.4132                                  | 0.1378                                          | 0.4169 | 0.4152 | 0.1297 | 1.1224  | 0.9592  | 0.8522  |
| $N = 64$                                                  | 0.4070                                  | 0.0963                                          | 0.4108 | 0.4083 | 0.0945 | 0.9214  | 1.0000  | 0.9990  |
| $N = 128$                                                 | 0.4036                                  | 0.0676                                          | 0.4051 | 0.4042 | 0.0661 | 0.6227  | 1.0000  | 1.0000  |
| $N = 256$                                                 | 0.4018                                  | 0.0476                                          | 0.4019 | 0.4014 | 0.0479 | -0.6817 | 1.0000  | 1.0000  |
| $p = 2, q = 1, V_{\text{rel}}(\boldsymbol{\Sigma}) = 0.6$ |                                         |                                                 |        |        |        |         |         |         |
| $N = 4$                                                   | 0.6025                                  | 0.2596                                          | 0.7743 | 0.7012 | 0.2530 | 27.5684 | 0.1468  | 0.0342  |
| $N = 8$                                                   | 0.5952                                  | 0.2126                                          | 0.6625 | 0.6262 | 0.2094 | 10.4774 | 0.5502  | 0.2920  |
| $N = 16$                                                  | 0.6000                                  | 0.1549                                          | 0.6271 | 0.6099 | 0.1560 | 4.4717  | 0.9312  | 0.8046  |
| $N = 32$                                                  | 0.6011                                  | 0.1100                                          | 0.6136 | 0.6029 | 0.1090 | 1.1799  | 0.9996  | 0.9940  |
| $N = 64$                                                  | 0.6009                                  | 0.0777                                          | 0.6038 | 0.6004 | 0.0780 | -0.4144 | 1.0000  | 1.0000  |
| $N = 128$                                                 | 0.6005                                  | 0.0549                                          | 0.6020 | 0.6004 | 0.0553 | -0.2033 | 1.0000  | 1.0000  |
| $N = 256$                                                 | 0.6003                                  | 0.0388                                          | 0.6015 | 0.6002 | 0.0384 | -0.1776 | 1.0000  | 1.0000  |
| $p = 2, q = 1, V_{\text{rel}}(\boldsymbol{\Sigma}) = 0.8$ |                                         |                                                 |        |        |        |         |         |         |
| $N = 4$                                                   | 0.7836                                  | 0.1336                                          | 0.8863 | 0.8078 | 0.2061 | 8.3207  | 0.2682  | 0.0708  |
| $N = 8$                                                   | 0.7847                                  | 0.1153                                          | 0.8314 | 0.7947 | 0.1473 | 4.8016  | 0.8766  | 0.6756  |
| $N = 16$                                                  | 0.7929                                  | 0.0866                                          | 0.8164 | 0.7963 | 0.1004 | 2.4327  | 0.9976  | 0.9890  |
| $N = 32$                                                  | 0.7969                                  | 0.0625                                          | 0.8090 | 0.7990 | 0.0672 | 2.2207  | 1.0000  | 1.0000  |
| $N = 64$                                                  | 0.7986                                  | 0.0445                                          | 0.8030 | 0.7983 | 0.0470 | -0.3966 | 1.0000  | 1.0000  |
| $N = 128$                                                 | 0.7993                                  | 0.0315                                          | 0.8008 | 0.7989 | 0.0318 | -0.9023 | 1.0000  | 1.0000  |
| $N = 256$                                                 | 0.7997                                  | 0.0223                                          | 0.8009 | 0.8003 | 0.0223 | 1.8873  | 1.0000  | 1.0000  |

(continued)

**Table S2.** (continued)

|                                                           | $\approx E[V_{\text{rel}}(\mathbf{S})]$ | $\approx \text{SD}[V_{\text{rel}}(\mathbf{S})]$ | Median | Mean   | ESD    | $T$     | Pow. 5% | Pow. 1% |
|-----------------------------------------------------------|-----------------------------------------|-------------------------------------------------|--------|--------|--------|---------|---------|---------|
| $p = 4, q = 1, V_{\text{rel}}(\boldsymbol{\Sigma}) = 0.1$ |                                         |                                                 |        |        |        |         |         |         |
| $N = 4$                                                   | 0.4100                                  | 0.2621                                          | 0.4457 | 0.4695 | 0.1653 | 25.4117 | 0.0964  | 0.0254  |
| $N = 8$                                                   | 0.2514                                  | 0.1644                                          | 0.2472 | 0.2694 | 0.1191 | 10.6867 | 0.1984  | 0.0760  |
| $N = 16$                                                  | 0.1758                                  | 0.1029                                          | 0.1661 | 0.1809 | 0.0855 | 4.2193  | 0.4512  | 0.2578  |
| $N = 32$                                                  | 0.1380                                  | 0.0671                                          | 0.1316 | 0.1392 | 0.0602 | 1.3758  | 0.7884  | 0.6014  |
| $N = 64$                                                  | 0.1190                                  | 0.0453                                          | 0.1150 | 0.1195 | 0.0433 | 0.7437  | 0.9820  | 0.9506  |
| $N = 128$                                                 | 0.1095                                  | 0.0312                                          | 0.1084 | 0.1104 | 0.0305 | 2.1101  | 0.9998  | 0.9994  |
| $N = 256$                                                 | 0.1048                                  | 0.0218                                          | 0.1034 | 0.1045 | 0.0214 | -0.9490 | 1.0000  | 1.0000  |
| $p = 4, q = 1, V_{\text{rel}}(\boldsymbol{\Sigma}) = 0.2$ |                                         |                                                 |        |        |        |         |         |         |
| $N = 4$                                                   | 0.4037                                  | 0.2878                                          | 0.4878 | 0.5064 | 0.1746 | 41.5546 | 0.1402  | 0.0424  |
| $N = 8$                                                   | 0.3041                                  | 0.1990                                          | 0.3186 | 0.3363 | 0.1442 | 15.8368 | 0.3792  | 0.2024  |
| $N = 16$                                                  | 0.2545                                  | 0.1316                                          | 0.2556 | 0.2624 | 0.1086 | 5.0868  | 0.7618  | 0.5808  |
| $N = 32$                                                  | 0.2280                                  | 0.0887                                          | 0.2250 | 0.2292 | 0.0792 | 1.0147  | 0.9722  | 0.9310  |
| $N = 64$                                                  | 0.2142                                  | 0.0610                                          | 0.2112 | 0.2144 | 0.0581 | 0.2411  | 1.0000  | 0.9998  |
| $N = 128$                                                 | 0.2072                                  | 0.0425                                          | 0.2049 | 0.2064 | 0.0411 | -1.3741 | 1.0000  | 1.0000  |
| $N = 256$                                                 | 0.2036                                  | 0.0298                                          | 0.2033 | 0.2040 | 0.0296 | 0.8971  | 1.0000  | 1.0000  |
| $p = 4, q = 1, V_{\text{rel}}(\boldsymbol{\Sigma}) = 0.4$ |                                         |                                                 |        |        |        |         |         |         |
| $N = 4$                                                   | 0.4602                                  | 0.2677                                          | 0.5962 | 0.5896 | 0.1887 | 48.4850 | 0.2948  | 0.1162  |
| $N = 8$                                                   | 0.4319                                  | 0.2065                                          | 0.4730 | 0.4675 | 0.1658 | 15.1734 | 0.7126  | 0.5234  |
| $N = 16$                                                  | 0.4200                                  | 0.1444                                          | 0.4316 | 0.4288 | 0.1272 | 4.8902  | 0.9750  | 0.9318  |
| $N = 32$                                                  | 0.4113                                  | 0.1001                                          | 0.4147 | 0.4125 | 0.0944 | 0.9058  | 1.0000  | 0.9994  |
| $N = 64$                                                  | 0.4060                                  | 0.0699                                          | 0.4073 | 0.4067 | 0.0682 | 0.7503  | 1.0000  | 1.0000  |
| $N = 128$                                                 | 0.4031                                  | 0.0490                                          | 0.4038 | 0.4026 | 0.0480 | -0.7644 | 1.0000  | 1.0000  |
| $N = 256$                                                 | 0.4016                                  | 0.0345                                          | 0.4012 | 0.4008 | 0.0335 | -1.7085 | 1.0000  | 1.0000  |
| $p = 4, q = 1, V_{\text{rel}}(\boldsymbol{\Sigma}) = 0.6$ |                                         |                                                 |        |        |        |         |         |         |
| $N = 4$                                                   | 0.5944                                  | 0.1973                                          | 0.7186 | 0.6836 | 0.1866 | 33.8195 | 0.5030  | 0.2728  |
| $N = 8$                                                   | 0.5930                                  | 0.1644                                          | 0.6442 | 0.6214 | 0.1590 | 12.5992 | 0.9218  | 0.8380  |
| $N = 16$                                                  | 0.5992                                  | 0.1195                                          | 0.6198 | 0.6055 | 0.1174 | 3.8086  | 0.9988  | 0.9962  |
| $N = 32$                                                  | 0.6006                                  | 0.0846                                          | 0.6086 | 0.6022 | 0.0830 | 1.3653  | 1.0000  | 1.0000  |
| $N = 64$                                                  | 0.6006                                  | 0.0596                                          | 0.6043 | 0.6007 | 0.0601 | 0.1178  | 1.0000  | 1.0000  |
| $N = 128$                                                 | 0.6004                                  | 0.0420                                          | 0.6017 | 0.5991 | 0.0421 | -2.1326 | 1.0000  | 1.0000  |
| $N = 256$                                                 | 0.6002                                  | 0.0297                                          | 0.6011 | 0.6001 | 0.0303 | -0.2881 | 1.0000  | 1.0000  |
| $p = 4, q = 1, V_{\text{rel}}(\boldsymbol{\Sigma}) = 0.8$ |                                         |                                                 |        |        |        |         |         |         |
| $N = 4$                                                   | 0.7812                                  | 0.1037                                          | 0.8548 | 0.8020 | 0.1610 | 9.1171  | 0.7666  | 0.5686  |
| $N = 8$                                                   | 0.7841                                  | 0.0920                                          | 0.8207 | 0.7927 | 0.1170 | 5.1526  | 0.9928  | 0.9804  |
| $N = 16$                                                  | 0.7927                                  | 0.0692                                          | 0.8086 | 0.7945 | 0.0793 | 1.6175  | 0.9998  | 0.9998  |
| $N = 32$                                                  | 0.7968                                  | 0.0498                                          | 0.8039 | 0.7967 | 0.0537 | -0.1966 | 1.0000  | 1.0000  |
| $N = 64$                                                  | 0.7985                                  | 0.0354                                          | 0.8026 | 0.7993 | 0.0368 | 1.5352  | 1.0000  | 1.0000  |
| $N = 128$                                                 | 0.7993                                  | 0.0251                                          | 0.8012 | 0.7994 | 0.0255 | 0.2206  | 1.0000  | 1.0000  |
| $N = 256$                                                 | 0.7997                                  | 0.0177                                          | 0.8003 | 0.7997 | 0.0176 | 0.0875  | 1.0000  | 1.0000  |

(continued)

**Table S2.** (continued)

|                                                       | $\approx E[V_{\text{rel}}(\mathbf{S})]$ | $\approx \text{SD}[V_{\text{rel}}(\mathbf{S})]$ | Median | Mean   | ESD    | $T$     | Pow. 5% | Pow. 1% |
|-------------------------------------------------------|-----------------------------------------|-------------------------------------------------|--------|--------|--------|---------|---------|---------|
| $p = 4, q = 2, V_{\text{rel}}(\mathbf{\Sigma}) = 0.1$ |                                         |                                                 |        |        |        |         |         |         |
| $N = 4$                                               | 0.4605                                  | 0.2422                                          | 0.4572 | 0.4810 | 0.1640 | 8.8203  | 0.0980  | 0.0270  |
| $N = 8$                                               | 0.2728                                  | 0.1327                                          | 0.2646 | 0.2784 | 0.1053 | 3.7235  | 0.1932  | 0.0616  |
| $N = 16$                                              | 0.1851                                  | 0.0733                                          | 0.1780 | 0.1855 | 0.0664 | 0.3458  | 0.5050  | 0.2212  |
| $N = 32$                                              | 0.1423                                  | 0.0429                                          | 0.1409 | 0.1433 | 0.0408 | 1.7920  | 0.9230  | 0.7422  |
| $N = 64$                                              | 0.1211                                  | 0.0267                                          | 0.1204 | 0.1215 | 0.0263 | 1.0538  | 0.9998  | 0.9976  |
| $N = 128$                                             | 0.1105                                  | 0.0175                                          | 0.1102 | 0.1107 | 0.0173 | 0.6470  | 1.0000  | 1.0000  |
| $N = 256$                                             | 0.1053                                  | 0.0118                                          | 0.1048 | 0.1049 | 0.0118 | -2.0594 | 1.0000  | 1.0000  |
| $p = 4, q = 2, V_{\text{rel}}(\mathbf{\Sigma}) = 0.2$ |                                         |                                                 |        |        |        |         |         |         |
| $N = 4$                                               | 0.5313                                  | 0.2669                                          | 0.5324 | 0.5467 | 0.1745 | 6.2103  | 0.1934  | 0.0684  |
| $N = 8$                                               | 0.3615                                  | 0.1449                                          | 0.3441 | 0.3667 | 0.1203 | 3.1014  | 0.4370  | 0.2064  |
| $N = 16$                                              | 0.2803                                  | 0.0771                                          | 0.2710 | 0.2804 | 0.0687 | 0.1260  | 0.9646  | 0.7720  |
| $N = 32$                                              | 0.2401                                  | 0.0426                                          | 0.2379 | 0.2413 | 0.0412 | 2.1470  | 1.0000  | 0.9994  |
| $N = 64$                                              | 0.2200                                  | 0.0249                                          | 0.2186 | 0.2199 | 0.0246 | -0.4333 | 1.0000  | 1.0000  |
| $N = 128$                                             | 0.2100                                  | 0.0154                                          | 0.2097 | 0.2099 | 0.0158 | -0.5985 | 1.0000  | 1.0000  |
| $N = 256$                                             | 0.2050                                  | 0.0101                                          | 0.2049 | 0.2051 | 0.0100 | 0.3652  | 1.0000  | 1.0000  |
| $p = 4, q = 2, V_{\text{rel}}(\mathbf{\Sigma}) = 0.4$ |                                         |                                                 |        |        |        |         |         |         |
| (This conformation is impossible)                     |                                         |                                                 |        |        |        |         |         |         |

(continued)

**Table S2.** (continued)

|                                                           | $\approx E[V_{\text{rel}}(\mathbf{S})]$ | $\approx \text{SD}[V_{\text{rel}}(\mathbf{S})]$ | Median | Mean   | ESD    | $T$     | Pow. 5% | Pow. 1% |
|-----------------------------------------------------------|-----------------------------------------|-------------------------------------------------|--------|--------|--------|---------|---------|---------|
| $p = 8, q = 1, V_{\text{rel}}(\boldsymbol{\Sigma}) = 0.1$ |                                         |                                                 |        |        |        |         |         |         |
| $N = 4$                                                   | 0.3892                                  | 0.1871                                          | 0.4158 | 0.4355 | 0.1090 | 30.0381 | 0.1688  | 0.0620  |
| $N = 8$                                                   | 0.2368                                  | 0.1191                                          | 0.2305 | 0.2475 | 0.0838 | 9.0124  | 0.4426  | 0.2874  |
| $N = 16$                                                  | 0.1673                                  | 0.0758                                          | 0.1604 | 0.1698 | 0.0621 | 2.8253  | 0.7950  | 0.6780  |
| $N = 32$                                                  | 0.1334                                  | 0.0502                                          | 0.1299 | 0.1343 | 0.0452 | 1.4051  | 0.9828  | 0.9576  |
| $N = 64$                                                  | 0.1167                                  | 0.0342                                          | 0.1140 | 0.1171 | 0.0326 | 0.8569  | 0.9998  | 0.9994  |
| $N = 128$                                                 | 0.1083                                  | 0.0237                                          | 0.1069 | 0.1080 | 0.0230 | -1.0270 | 1.0000  | 1.0000  |
| $N = 256$                                                 | 0.1042                                  | 0.0166                                          | 0.1034 | 0.1043 | 0.0166 | 0.7600  | 1.0000  | 1.0000  |
| $p = 8, q = 1, V_{\text{rel}}(\boldsymbol{\Sigma}) = 0.2$ |                                         |                                                 |        |        |        |         |         |         |
| $N = 4$                                                   | 0.3906                                  | 0.2315                                          | 0.4683 | 0.4859 | 0.1313 | 51.3142 | 0.3222  | 0.1598  |
| $N = 8$                                                   | 0.2957                                  | 0.1608                                          | 0.3077 | 0.3226 | 0.1115 | 17.0187 | 0.7298  | 0.5902  |
| $N = 16$                                                  | 0.2495                                  | 0.1066                                          | 0.2474 | 0.2544 | 0.0874 | 3.9350  | 0.9640  | 0.9300  |
| $N = 32$                                                  | 0.2252                                  | 0.0721                                          | 0.2229 | 0.2269 | 0.0661 | 1.7453  | 1.0000  | 0.9996  |
| $N = 64$                                                  | 0.2127                                  | 0.0496                                          | 0.2102 | 0.2125 | 0.0480 | -0.2832 | 1.0000  | 1.0000  |
| $N = 128$                                                 | 0.2064                                  | 0.0346                                          | 0.2067 | 0.2073 | 0.0333 | 1.8083  | 1.0000  | 1.0000  |
| $N = 256$                                                 | 0.2032                                  | 0.0243                                          | 0.2029 | 0.2030 | 0.0241 | -0.6017 | 1.0000  | 1.0000  |
| $p = 8, q = 1, V_{\text{rel}}(\boldsymbol{\Sigma}) = 0.4$ |                                         |                                                 |        |        |        |         |         |         |
| $N = 4$                                                   | 0.4525                                  | 0.2334                                          | 0.5701 | 0.5731 | 0.1549 | 55.1063 | 0.5656  | 0.3908  |
| $N = 8$                                                   | 0.4290                                  | 0.1803                                          | 0.4659 | 0.4613 | 0.1429 | 15.9923 | 0.9252  | 0.8754  |
| $N = 16$                                                  | 0.4183                                  | 0.1256                                          | 0.4316 | 0.4290 | 0.1092 | 6.9108  | 0.9986  | 0.9980  |
| $N = 32$                                                  | 0.4103                                  | 0.0870                                          | 0.4153 | 0.4128 | 0.0823 | 2.1081  | 1.0000  | 1.0000  |
| $N = 64$                                                  | 0.4055                                  | 0.0606                                          | 0.4078 | 0.4063 | 0.0585 | 0.9585  | 1.0000  | 1.0000  |
| $N = 128$                                                 | 0.4028                                  | 0.0425                                          | 0.4038 | 0.4034 | 0.0417 | 1.0354  | 1.0000  | 1.0000  |
| $N = 256$                                                 | 0.4014                                  | 0.0299                                          | 0.4013 | 0.4011 | 0.0292 | -0.8338 | 1.0000  | 1.0000  |
| $p = 8, q = 1, V_{\text{rel}}(\boldsymbol{\Sigma}) = 0.6$ |                                         |                                                 |        |        |        |         |         |         |
| $N = 4$                                                   | 0.5903                                  | 0.1765                                          | 0.6998 | 0.6731 | 0.1648 | 35.5306 | 0.7656  | 0.6362  |
| $N = 8$                                                   | 0.5920                                  | 0.1482                                          | 0.6382 | 0.6170 | 0.1435 | 12.3162 | 0.9902  | 0.9768  |
| $N = 16$                                                  | 0.5987                                  | 0.1074                                          | 0.6205 | 0.6077 | 0.1052 | 6.0548  | 0.9998  | 0.9998  |
| $N = 32$                                                  | 0.6004                                  | 0.0758                                          | 0.6060 | 0.5997 | 0.0766 | -0.6096 | 1.0000  | 1.0000  |
| $N = 64$                                                  | 0.6005                                  | 0.0534                                          | 0.6031 | 0.6005 | 0.0536 | 0.0160  | 1.0000  | 1.0000  |
| $N = 128$                                                 | 0.6003                                  | 0.0376                                          | 0.6023 | 0.6003 | 0.0370 | -0.1299 | 1.0000  | 1.0000  |
| $N = 256$                                                 | 0.6002                                  | 0.0265                                          | 0.6012 | 0.6001 | 0.0266 | -0.3410 | 1.0000  | 1.0000  |
| $p = 8, q = 1, V_{\text{rel}}(\boldsymbol{\Sigma}) = 0.8$ |                                         |                                                 |        |        |        |         |         |         |
| $N = 4$                                                   | 0.7800                                  | 0.0936                                          | 0.8464 | 0.8015 | 0.1448 | 10.4973 | 0.9262  | 0.8738  |
| $N = 8$                                                   | 0.7839                                  | 0.0843                                          | 0.8159 | 0.7910 | 0.1083 | 4.6211  | 0.9996  | 0.9990  |
| $N = 16$                                                  | 0.7926                                  | 0.0634                                          | 0.8056 | 0.7930 | 0.0728 | 0.3423  | 1.0000  | 1.0000  |
| $N = 32$                                                  | 0.7968                                  | 0.0455                                          | 0.8030 | 0.7978 | 0.0473 | 1.5850  | 1.0000  | 1.0000  |
| $N = 64$                                                  | 0.7985                                  | 0.0323                                          | 0.8008 | 0.7982 | 0.0331 | -0.7649 | 1.0000  | 1.0000  |
| $N = 128$                                                 | 0.7993                                  | 0.0229                                          | 0.8011 | 0.7997 | 0.0231 | 1.0882  | 1.0000  | 1.0000  |
| $N = 256$                                                 | 0.7997                                  | 0.0162                                          | 0.8001 | 0.7994 | 0.0162 | -1.1600 | 1.0000  | 1.0000  |

(continued)

**Table S2.** (continued)

|                                              | $\approx E[V_{\text{rel}}(\mathbf{S})]$ | $\approx \text{SD}[V_{\text{rel}}(\mathbf{S})]$ | Median | Mean   | ESD    | $T$     | Pow. 5% | Pow. 1% |
|----------------------------------------------|-----------------------------------------|-------------------------------------------------|--------|--------|--------|---------|---------|---------|
| $p = 8, q = 2, V_{\text{rel}}(\Sigma) = 0.1$ |                                         |                                                 |        |        |        |         |         |         |
| $N = 4$                                      | 0.4290                                  | 0.1604                                          | 0.4268 | 0.4460 | 0.1079 | 11.1170 | 0.1910  | 0.0696  |
| $N = 8$                                      | 0.2529                                  | 0.0895                                          | 0.2481 | 0.2581 | 0.0725 | 5.1536  | 0.5284  | 0.3212  |
| $N = 16$                                     | 0.1742                                  | 0.0517                                          | 0.1705 | 0.1746 | 0.0460 | 0.5660  | 0.9114  | 0.8146  |
| $N = 32$                                     | 0.1366                                  | 0.0319                                          | 0.1351 | 0.1370 | 0.0302 | 0.8562  | 0.9996  | 0.9974  |
| $N = 64$                                     | 0.1182                                  | 0.0208                                          | 0.1167 | 0.1176 | 0.0202 | -2.1649 | 1.0000  | 1.0000  |
| $N = 128$                                    | 0.1091                                  | 0.0141                                          | 0.1090 | 0.1091 | 0.0139 | 0.4297  | 1.0000  | 1.0000  |
| $N = 256$                                    | 0.1045                                  | 0.0097                                          | 0.1045 | 0.1045 | 0.0096 | -0.2327 | 1.0000  | 1.0000  |
| $p = 8, q = 2, V_{\text{rel}}(\Sigma) = 0.2$ |                                         |                                                 |        |        |        |         |         |         |
| $N = 4$                                      | 0.4926                                  | 0.1956                                          | 0.4995 | 0.5161 | 0.1295 | 12.8805 | 0.3960  | 0.2078  |
| $N = 8$                                      | 0.3393                                  | 0.1091                                          | 0.3322 | 0.3433 | 0.0889 | 3.1755  | 0.8854  | 0.7434  |
| $N = 16$                                     | 0.2687                                  | 0.0615                                          | 0.2643 | 0.2696 | 0.0573 | 1.1307  | 0.9990  | 0.9956  |
| $N = 32$                                     | 0.2341                                  | 0.0368                                          | 0.2330 | 0.2346 | 0.0361 | 0.9088  | 1.0000  | 1.0000  |
| $N = 64$                                     | 0.2170                                  | 0.0234                                          | 0.2166 | 0.2168 | 0.0231 | -0.5343 | 1.0000  | 1.0000  |
| $N = 128$                                    | 0.2085                                  | 0.0155                                          | 0.2083 | 0.2083 | 0.0153 | -0.7404 | 1.0000  | 1.0000  |
| $N = 256$                                    | 0.2042                                  | 0.0106                                          | 0.2043 | 0.2042 | 0.0103 | -0.0092 | 1.0000  | 1.0000  |
| $p = 8, q = 2, V_{\text{rel}}(\Sigma) = 0.4$ |                                         |                                                 |        |        |        |         |         |         |
| $N = 4$                                      | 0.6820                                  | 0.2513                                          | 0.6817 | 0.6803 | 0.1556 | -0.7726 | 0.7586  | 0.5986  |
| $N = 8$                                      | 0.5399                                  | 0.1346                                          | 0.5145 | 0.5385 | 0.1050 | -0.9238 | 1.0000  | 1.0000  |
| $N = 16$                                     | 0.4698                                  | 0.0683                                          | 0.4529 | 0.4693 | 0.0602 | -0.6598 | 1.0000  | 1.0000  |
| $N = 32$                                     | 0.4349                                  | 0.0344                                          | 0.4258 | 0.4348 | 0.0316 | -0.3472 | 1.0000  | 1.0000  |
| $N = 64$                                     | 0.4175                                  | 0.0174                                          | 0.4131 | 0.4176 | 0.0169 | 0.4181  | 1.0000  | 1.0000  |
| $N = 128$                                    | 0.4087                                  | 0.0089                                          | 0.4066 | 0.4088 | 0.0088 | 0.2251  | 1.0000  | 1.0000  |
| $N = 256$                                    | 0.4044                                  | 0.0047                                          | 0.4034 | 0.4044 | 0.0048 | 0.2576  | 1.0000  | 1.0000  |
| $p = 8, q = 4, V_{\text{rel}}(\Sigma) = 0.1$ |                                         |                                                 |        |        |        |         |         |         |
| $N = 4$                                      | 0.4646                                  | 0.1481                                          | 0.4458 | 0.4666 | 0.1129 | 1.2361  | 0.2366  | 0.0988  |
| $N = 8$                                      | 0.2682                                  | 0.0717                                          | 0.2611 | 0.2699 | 0.0636 | 1.8384  | 0.6264  | 0.3590  |
| $N = 16$                                     | 0.1811                                  | 0.0351                                          | 0.1770 | 0.1817 | 0.0335 | 1.3536  | 0.9980  | 0.9606  |
| $N = 32$                                     | 0.1398                                  | 0.0177                                          | 0.1379 | 0.1397 | 0.0170 | -0.3943 | 1.0000  | 1.0000  |
| $N = 64$                                     | 0.1197                                  | 0.0093                                          | 0.1189 | 0.1198 | 0.0092 | 0.7866  | 1.0000  | 1.0000  |
| $N = 128$                                    | 0.1098                                  | 0.0052                                          | 0.1095 | 0.1098 | 0.0051 | 0.1577  | 1.0000  | 1.0000  |
| $N = 256$                                    | 0.1049                                  | 0.0030                                          | 0.1048 | 0.1049 | 0.0030 | -0.9935 | 1.0000  | 1.0000  |
| $p = 8, q = 4, V_{\text{rel}}(\Sigma) = 0.2$ |                                         |                                                 |        |        |        |         |         |         |
| (This conformation is impossible)            |                                         |                                                 |        |        |        |         |         |         |

(continued)

**Table S2.** (continued)

|                                                            | $\approx E[V_{\text{rel}}(\mathbf{S})]$ | $\approx \text{SD}[V_{\text{rel}}(\mathbf{S})]$ | Median | Mean   | ESD    | $T$     | Pow. 5% | Pow. 1% |
|------------------------------------------------------------|-----------------------------------------|-------------------------------------------------|--------|--------|--------|---------|---------|---------|
| $p = 16, q = 1, V_{\text{rel}}(\boldsymbol{\Sigma}) = 0.1$ |                                         |                                                 |        |        |        |         |         |         |
| $N = 4$                                                    | 0.3781                                  | 0.1547                                          | 0.3993 | 0.4200 | 0.0844 | 35.1233 | 0.3406  | 0.1980  |
| $N = 8$                                                    | 0.2291                                  | 0.1000                                          | 0.2267 | 0.2407 | 0.0704 | 11.6244 | 0.7040  | 0.5780  |
| $N = 16$                                                   | 0.1629                                  | 0.0643                                          | 0.1566 | 0.1645 | 0.0534 | 2.1175  | 0.9522  | 0.9166  |
| $N = 32$                                                   | 0.1311                                  | 0.0429                                          | 0.1278 | 0.1315 | 0.0392 | 0.7208  | 0.9994  | 0.9984  |
| $N = 64$                                                   | 0.1155                                  | 0.0293                                          | 0.1132 | 0.1157 | 0.0283 | 0.6514  | 1.0000  | 1.0000  |
| $N = 128$                                                  | 0.1077                                  | 0.0204                                          | 0.1069 | 0.1079 | 0.0201 | 0.5728  | 1.0000  | 1.0000  |
| $N = 256$                                                  | 0.1039                                  | 0.0143                                          | 0.1033 | 0.1039 | 0.0142 | 0.0771  | 1.0000  | 1.0000  |
| $p = 16, q = 1, V_{\text{rel}}(\boldsymbol{\Sigma}) = 0.2$ |                                         |                                                 |        |        |        |         |         |         |
| $N = 4$                                                    | 0.3839                                  | 0.2075                                          | 0.4479 | 0.4692 | 0.1109 | 54.4282 | 0.5346  | 0.3688  |
| $N = 8$                                                    | 0.2914                                  | 0.1443                                          | 0.3019 | 0.3139 | 0.1010 | 15.7447 | 0.8904  | 0.8238  |
| $N = 16$                                                   | 0.2469                                  | 0.0958                                          | 0.2456 | 0.2524 | 0.0791 | 4.9064  | 0.9968  | 0.9936  |
| $N = 32$                                                   | 0.2238                                  | 0.0648                                          | 0.2218 | 0.2241 | 0.0585 | 0.3753  | 1.0000  | 1.0000  |
| $N = 64$                                                   | 0.2120                                  | 0.0447                                          | 0.2112 | 0.2122 | 0.0426 | 0.3554  | 1.0000  | 1.0000  |
| $N = 128$                                                  | 0.2060                                  | 0.0312                                          | 0.2048 | 0.2055 | 0.0303 | -1.2781 | 1.0000  | 1.0000  |
| $N = 256$                                                  | 0.2030                                  | 0.0219                                          | 0.2026 | 0.2030 | 0.0216 | -0.1191 | 1.0000  | 1.0000  |
| $p = 16, q = 1, V_{\text{rel}}(\boldsymbol{\Sigma}) = 0.4$ |                                         |                                                 |        |        |        |         |         |         |
| $N = 4$                                                    | 0.4486                                  | 0.2189                                          | 0.5668 | 0.5678 | 0.1418 | 59.4299 | 0.7750  | 0.6596  |
| $N = 8$                                                    | 0.4275                                  | 0.1691                                          | 0.4657 | 0.4626 | 0.1346 | 18.4219 | 0.9828  | 0.9698  |
| $N = 16$                                                   | 0.4174                                  | 0.1175                                          | 0.4302 | 0.4270 | 0.1049 | 6.4710  | 1.0000  | 1.0000  |
| $N = 32$                                                   | 0.4098                                  | 0.0813                                          | 0.4161 | 0.4129 | 0.0762 | 2.8682  | 1.0000  | 1.0000  |
| $N = 64$                                                   | 0.4052                                  | 0.0566                                          | 0.4070 | 0.4058 | 0.0548 | 0.7118  | 1.0000  | 1.0000  |
| $N = 128$                                                  | 0.4027                                  | 0.0397                                          | 0.4042 | 0.4038 | 0.0394 | 1.9337  | 1.0000  | 1.0000  |
| $N = 256$                                                  | 0.4014                                  | 0.0279                                          | 0.4013 | 0.4012 | 0.0280 | -0.3594 | 1.0000  | 1.0000  |
| $p = 16, q = 1, V_{\text{rel}}(\boldsymbol{\Sigma}) = 0.6$ |                                         |                                                 |        |        |        |         |         |         |
| $N = 4$                                                    | 0.5882                                  | 0.1678                                          | 0.6919 | 0.6700 | 0.1577 | 36.6795 | 0.8948  | 0.8326  |
| $N = 8$                                                    | 0.5915                                  | 0.1412                                          | 0.6344 | 0.6165 | 0.1383 | 12.8135 | 0.9982  | 0.9954  |
| $N = 16$                                                   | 0.5985                                  | 0.1023                                          | 0.6172 | 0.6057 | 0.1014 | 5.0298  | 1.0000  | 1.0000  |
| $N = 32$                                                   | 0.6003                                  | 0.0721                                          | 0.6085 | 0.6022 | 0.0714 | 1.9527  | 1.0000  | 1.0000  |
| $N = 64$                                                   | 0.6004                                  | 0.0507                                          | 0.6032 | 0.6007 | 0.0506 | 0.4295  | 1.0000  | 1.0000  |
| $N = 128$                                                  | 0.6003                                  | 0.0357                                          | 0.6020 | 0.6007 | 0.0361 | 0.8161  | 1.0000  | 1.0000  |
| $N = 256$                                                  | 0.6002                                  | 0.0252                                          | 0.6006 | 0.5999 | 0.0253 | -0.8000 | 1.0000  | 1.0000  |
| $p = 16, q = 1, V_{\text{rel}}(\boldsymbol{\Sigma}) = 0.8$ |                                         |                                                 |        |        |        |         |         |         |
| $N = 4$                                                    | 0.7795                                  | 0.0893                                          | 0.8397 | 0.7967 | 0.1413 | 8.6401  | 0.9688  | 0.9514  |
| $N = 8$                                                    | 0.7838                                  | 0.0810                                          | 0.8153 | 0.7913 | 0.1049 | 5.0688  | 0.9998  | 0.9998  |
| $N = 16$                                                   | 0.7926                                  | 0.0609                                          | 0.8067 | 0.7943 | 0.0696 | 1.7415  | 1.0000  | 1.0000  |
| $N = 32$                                                   | 0.7968                                  | 0.0437                                          | 0.8044 | 0.7989 | 0.0452 | 3.3474  | 1.0000  | 1.0000  |
| $N = 64$                                                   | 0.7985                                  | 0.0310                                          | 0.8019 | 0.7990 | 0.0323 | 1.0675  | 1.0000  | 1.0000  |
| $N = 128$                                                  | 0.7993                                  | 0.0220                                          | 0.8000 | 0.7988 | 0.0223 | -1.7432 | 1.0000  | 1.0000  |
| $N = 256$                                                  | 0.7997                                  | 0.0155                                          | 0.8000 | 0.7996 | 0.0157 | -0.2993 | 1.0000  | 1.0000  |

(continued)

**Table S2.** (continued)

|                                               | $\approx E[V_{\text{rel}}(\mathbf{S})]$ | $\approx \text{SD}[V_{\text{rel}}(\mathbf{S})]$ | Median | Mean   | ESD    | $T$     | Pow. 5% | Pow. 1% |
|-----------------------------------------------|-----------------------------------------|-------------------------------------------------|--------|--------|--------|---------|---------|---------|
| $p = 16, q = 2, V_{\text{rel}}(\Sigma) = 0.1$ |                                         |                                                 |        |        |        |         |         |         |
| $N = 4$                                       | 0.4143                                  | 0.1238                                          | 0.4134 | 0.4286 | 0.0815 | 12.3917 | 0.3806  | 0.1976  |
| $N = 8$                                       | 0.2434                                  | 0.0706                                          | 0.2383 | 0.2455 | 0.0557 | 2.5532  | 0.8294  | 0.6884  |
| $N = 16$                                      | 0.1691                                  | 0.0419                                          | 0.1666 | 0.1696 | 0.0369 | 1.0663  | 0.9958  | 0.9908  |
| $N = 32$                                      | 0.1339                                  | 0.0266                                          | 0.1333 | 0.1345 | 0.0255 | 1.5713  | 1.0000  | 1.0000  |
| $N = 64$                                      | 0.1168                                  | 0.0176                                          | 0.1164 | 0.1170 | 0.0173 | 0.8504  | 1.0000  | 1.0000  |
| $N = 128$                                     | 0.1084                                  | 0.0120                                          | 0.1079 | 0.1082 | 0.0119 | -1.0759 | 1.0000  | 1.0000  |
| $N = 256$                                     | 0.1042                                  | 0.0084                                          | 0.1037 | 0.1040 | 0.0084 | -1.3172 | 1.0000  | 1.0000  |
| $p = 16, q = 2, V_{\text{rel}}(\Sigma) = 0.2$ |                                         |                                                 |        |        |        |         |         |         |
| $N = 4$                                       | 0.4775                                  | 0.1649                                          | 0.4801 | 0.4984 | 0.1080 | 13.7304 | 0.6566  | 0.4588  |
| $N = 8$                                       | 0.3305                                  | 0.0936                                          | 0.3271 | 0.3362 | 0.0744 | 5.3878  | 0.9894  | 0.9730  |
| $N = 16$                                      | 0.2640                                  | 0.0543                                          | 0.2616 | 0.2646 | 0.0499 | 0.8966  | 1.0000  | 1.0000  |
| $N = 32$                                      | 0.2317                                  | 0.0334                                          | 0.2306 | 0.2316 | 0.0320 | -0.2412 | 1.0000  | 1.0000  |
| $N = 64$                                      | 0.2158                                  | 0.0217                                          | 0.2152 | 0.2151 | 0.0213 | -2.2294 | 1.0000  | 1.0000  |
| $N = 128$                                     | 0.2079                                  | 0.0147                                          | 0.2077 | 0.2077 | 0.0146 | -0.9653 | 1.0000  | 1.0000  |
| $N = 256$                                     | 0.2039                                  | 0.0101                                          | 0.2043 | 0.2042 | 0.0098 | 1.6488  | 1.0000  | 1.0000  |
| $p = 16, q = 2, V_{\text{rel}}(\Sigma) = 0.4$ |                                         |                                                 |        |        |        |         |         |         |
| $N = 4$                                       | 0.6595                                  | 0.2219                                          | 0.6539 | 0.6600 | 0.1378 | 0.2882  | 0.9756  | 0.8632  |
| $N = 8$                                       | 0.5273                                  | 0.1187                                          | 0.5057 | 0.5269 | 0.0936 | -0.3636 | 1.0000  | 1.0000  |
| $N = 16$                                      | 0.4634                                  | 0.0608                                          | 0.4512 | 0.4639 | 0.0540 | 0.5775  | 1.0000  | 1.0000  |
| $N = 32$                                      | 0.4317                                  | 0.0314                                          | 0.4254 | 0.4310 | 0.0285 | -1.7871 | 1.0000  | 1.0000  |
| $N = 64$                                      | 0.4158                                  | 0.0167                                          | 0.4131 | 0.4155 | 0.0159 | -1.6153 | 1.0000  | 1.0000  |
| $N = 128$                                     | 0.4079                                  | 0.0093                                          | 0.4068 | 0.4079 | 0.0093 | -0.0692 | 1.0000  | 1.0000  |
| $N = 256$                                     | 0.4040                                  | 0.0054                                          | 0.4035 | 0.4039 | 0.0055 | -1.0354 | 1.0000  | 1.0000  |
| $p = 16, q = 4, V_{\text{rel}}(\Sigma) = 0.1$ |                                         |                                                 |        |        |        |         |         |         |
| $N = 4$                                       | 0.4407                                  | 0.1087                                          | 0.4285 | 0.4431 | 0.0808 | 2.0856  | 0.4498  | 0.2388  |
| $N = 8$                                       | 0.2545                                  | 0.0534                                          | 0.2481 | 0.2548 | 0.0460 | 0.4484  | 0.9444  | 0.8240  |
| $N = 16$                                      | 0.1740                                  | 0.0273                                          | 0.1716 | 0.1746 | 0.0259 | 1.7728  | 1.0000  | 1.0000  |
| $N = 32$                                      | 0.1362                                  | 0.0149                                          | 0.1349 | 0.1358 | 0.0144 | -2.2596 | 1.0000  | 1.0000  |
| $N = 64$                                      | 0.1179                                  | 0.0087                                          | 0.1176 | 0.1178 | 0.0085 | -1.1815 | 1.0000  | 1.0000  |
| $N = 128$                                     | 0.1089                                  | 0.0055                                          | 0.1089 | 0.1091 | 0.0054 | 2.0563  | 1.0000  | 1.0000  |
| $N = 256$                                     | 0.1044                                  | 0.0036                                          | 0.1044 | 0.1044 | 0.0036 | -0.7657 | 1.0000  | 1.0000  |
| $p = 16, q = 4, V_{\text{rel}}(\Sigma) = 0.2$ |                                         |                                                 |        |        |        |         |         |         |
| $N = 4$                                       | 0.5429                                  | 0.1577                                          | 0.5188 | 0.5399 | 0.1191 | -1.7637 | 0.8000  | 0.5890  |
| $N = 8$                                       | 0.3600                                  | 0.0765                                          | 0.3492 | 0.3588 | 0.0665 | -1.2879 | 1.0000  | 1.0000  |
| $N = 16$                                      | 0.2774                                  | 0.0369                                          | 0.2721 | 0.2773 | 0.0347 | -0.1483 | 1.0000  | 1.0000  |
| $N = 32$                                      | 0.2381                                  | 0.0181                                          | 0.2359 | 0.2382 | 0.0176 | 0.5801  | 1.0000  | 1.0000  |
| $N = 64$                                      | 0.2189                                  | 0.0089                                          | 0.2174 | 0.2188 | 0.0088 | -0.4406 | 1.0000  | 1.0000  |
| $N = 128$                                     | 0.2094                                  | 0.0044                                          | 0.2087 | 0.2095 | 0.0045 | 1.3265  | 1.0000  | 1.0000  |
| $N = 256$                                     | 0.2047                                  | 0.0022                                          | 0.2043 | 0.2047 | 0.0022 | -1.4616 | 1.0000  | 1.0000  |

(continued)



**Table S2.** (continued)

|                                                            | $\approx E[V_{\text{rel}}(\mathbf{S})]$ | $\approx \text{SD}[V_{\text{rel}}(\mathbf{S})]$ | Median | Mean   | ESD    | $T$     | Pow. 5% | Pow. 1% |
|------------------------------------------------------------|-----------------------------------------|-------------------------------------------------|--------|--------|--------|---------|---------|---------|
| $p = 32, q = 1, V_{\text{rel}}(\boldsymbol{\Sigma}) = 0.1$ |                                         |                                                 |        |        |        |         |         |         |
| $N = 4$                                                    | 0.3722                                  | 0.1401                                          | 0.3890 | 0.4085 | 0.0722 | 35.5187 | 0.5116  | 0.3740  |
| $N = 8$                                                    | 0.2252                                  | 0.0913                                          | 0.2179 | 0.2316 | 0.0629 | 7.1557  | 0.8658  | 0.7946  |
| $N = 16$                                                   | 0.1607                                  | 0.0590                                          | 0.1578 | 0.1642 | 0.0492 | 4.9649  | 0.9948  | 0.9884  |
| $N = 32$                                                   | 0.1300                                  | 0.0395                                          | 0.1274 | 0.1307 | 0.0355 | 1.5884  | 1.0000  | 1.0000  |
| $N = 64$                                                   | 0.1149                                  | 0.0271                                          | 0.1135 | 0.1151 | 0.0258 | 0.5694  | 1.0000  | 1.0000  |
| $N = 128$                                                  | 0.1074                                  | 0.0188                                          | 0.1063 | 0.1069 | 0.0185 | -2.1220 | 1.0000  | 1.0000  |
| $N = 256$                                                  | 0.1037                                  | 0.0132                                          | 0.1028 | 0.1033 | 0.0129 | -2.0896 | 1.0000  | 1.0000  |
| $p = 32, q = 1, V_{\text{rel}}(\boldsymbol{\Sigma}) = 0.2$ |                                         |                                                 |        |        |        |         |         |         |
| $N = 4$                                                    | 0.3805                                  | 0.1965                                          | 0.4370 | 0.4585 | 0.1007 | 54.7782 | 0.6940  | 0.5928  |
| $N = 8$                                                    | 0.2893                                  | 0.1367                                          | 0.2993 | 0.3106 | 0.0957 | 15.8065 | 0.9646  | 0.9436  |
| $N = 16$                                                   | 0.2456                                  | 0.0907                                          | 0.2423 | 0.2484 | 0.0741 | 2.6792  | 1.0000  | 0.9996  |
| $N = 32$                                                   | 0.2231                                  | 0.0614                                          | 0.2216 | 0.2249 | 0.0564 | 2.2321  | 1.0000  | 1.0000  |
| $N = 64$                                                   | 0.2116                                  | 0.0424                                          | 0.2110 | 0.2126 | 0.0401 | 1.6316  | 1.0000  | 1.0000  |
| $N = 128$                                                  | 0.2058                                  | 0.0296                                          | 0.2061 | 0.2065 | 0.0284 | 1.6193  | 1.0000  | 1.0000  |
| $N = 256$                                                  | 0.2029                                  | 0.0208                                          | 0.2028 | 0.2031 | 0.0202 | 0.5471  | 1.0000  | 1.0000  |
| $p = 32, q = 1, V_{\text{rel}}(\boldsymbol{\Sigma}) = 0.4$ |                                         |                                                 |        |        |        |         |         |         |
| $N = 4$                                                    | 0.4467                                  | 0.2122                                          | 0.5598 | 0.5635 | 0.1376 | 60.0007 | 0.8810  | 0.8234  |
| $N = 8$                                                    | 0.4268                                  | 0.1638                                          | 0.4631 | 0.4583 | 0.1291 | 17.2526 | 0.9966  | 0.9944  |
| $N = 16$                                                   | 0.4170                                  | 0.1137                                          | 0.4271 | 0.4250 | 0.0995 | 5.6662  | 1.0000  | 1.0000  |
| $N = 32$                                                   | 0.4096                                  | 0.0786                                          | 0.4154 | 0.4128 | 0.0756 | 2.9659  | 1.0000  | 1.0000  |
| $N = 64$                                                   | 0.4051                                  | 0.0547                                          | 0.4072 | 0.4057 | 0.0529 | 0.7484  | 1.0000  | 1.0000  |
| $N = 128$                                                  | 0.4026                                  | 0.0384                                          | 0.4038 | 0.4036 | 0.0382 | 1.8820  | 1.0000  | 1.0000  |
| $N = 256$                                                  | 0.4013                                  | 0.0270                                          | 0.4010 | 0.4011 | 0.0265 | -0.5358 | 1.0000  | 1.0000  |
| $p = 32, q = 1, V_{\text{rel}}(\boldsymbol{\Sigma}) = 0.6$ |                                         |                                                 |        |        |        |         |         |         |
| $N = 4$                                                    | 0.5872                                  | 0.1637                                          | 0.6947 | 0.6706 | 0.1518 | 38.8361 | 0.9460  | 0.9222  |
| $N = 8$                                                    | 0.5912                                  | 0.1380                                          | 0.6345 | 0.6170 | 0.1313 | 13.8710 | 1.0000  | 0.9998  |
| $N = 16$                                                   | 0.5984                                  | 0.0998                                          | 0.6160 | 0.6041 | 0.0995 | 4.0499  | 1.0000  | 1.0000  |
| $N = 32$                                                   | 0.6002                                  | 0.0703                                          | 0.6081 | 0.6018 | 0.0706 | 1.6224  | 1.0000  | 1.0000  |
| $N = 64$                                                   | 0.6004                                  | 0.0494                                          | 0.6041 | 0.6014 | 0.0492 | 1.4951  | 1.0000  | 1.0000  |
| $N = 128$                                                  | 0.6003                                  | 0.0348                                          | 0.6004 | 0.5996 | 0.0348 | -1.3790 | 1.0000  | 1.0000  |
| $N = 256$                                                  | 0.6002                                  | 0.0246                                          | 0.6011 | 0.6002 | 0.0245 | 0.0139  | 1.0000  | 1.0000  |
| $p = 32, q = 1, V_{\text{rel}}(\boldsymbol{\Sigma}) = 0.8$ |                                         |                                                 |        |        |        |         |         |         |
| $N = 4$                                                    | 0.7792                                  | 0.0873                                          | 0.8365 | 0.7949 | 0.1393 | 7.9763  | 0.9844  | 0.9772  |
| $N = 8$                                                    | 0.7837                                  | 0.0794                                          | 0.8157 | 0.7922 | 0.1009 | 5.9763  | 1.0000  | 1.0000  |
| $N = 16$                                                   | 0.7926                                  | 0.0597                                          | 0.8050 | 0.7935 | 0.0684 | 0.9693  | 1.0000  | 1.0000  |
| $N = 32$                                                   | 0.7967                                  | 0.0429                                          | 0.8033 | 0.7977 | 0.0452 | 1.5534  | 1.0000  | 1.0000  |
| $N = 64$                                                   | 0.7985                                  | 0.0304                                          | 0.8008 | 0.7983 | 0.0308 | -0.6108 | 1.0000  | 1.0000  |
| $N = 128$                                                  | 0.7993                                  | 0.0215                                          | 0.8011 | 0.7998 | 0.0215 | 1.6288  | 1.0000  | 1.0000  |
| $N = 256$                                                  | 0.7997                                  | 0.0152                                          | 0.8001 | 0.7994 | 0.0154 | -1.2286 | 1.0000  | 1.0000  |

(continued)

**Table S2.** (continued)

|                                               | $\approx E[V_{\text{rel}}(\mathbf{S})]$ | $\approx \text{SD}[V_{\text{rel}}(\mathbf{S})]$ | Median | Mean   | ESD    | $T$     | Pow. 5% | Pow. 1% |
|-----------------------------------------------|-----------------------------------------|-------------------------------------------------|--------|--------|--------|---------|---------|---------|
| $p = 32, q = 2, V_{\text{rel}}(\Sigma) = 0.1$ |                                         |                                                 |        |        |        |         |         |         |
| $N = 4$                                       | 0.4069                                  | 0.1066                                          | 0.4070 | 0.4201 | 0.0673 | 13.8253 | 0.6254  | 0.4612  |
| $N = 8$                                       | 0.2388                                  | 0.0619                                          | 0.2344 | 0.2412 | 0.0491 | 3.4320  | 0.9654  | 0.9284  |
| $N = 16$                                      | 0.1665                                  | 0.0374                                          | 0.1634 | 0.1660 | 0.0336 | -1.0262 | 0.9998  | 0.9996  |
| $N = 32$                                      | 0.1326                                  | 0.0240                                          | 0.1319 | 0.1326 | 0.0229 | -0.0886 | 1.0000  | 1.0000  |
| $N = 64$                                      | 0.1162                                  | 0.0161                                          | 0.1160 | 0.1163 | 0.0156 | 0.7616  | 1.0000  | 1.0000  |
| $N = 128$                                     | 0.1080                                  | 0.0110                                          | 0.1077 | 0.1080 | 0.0108 | -0.3648 | 1.0000  | 1.0000  |
| $N = 256$                                     | 0.1040                                  | 0.0077                                          | 0.1041 | 0.1041 | 0.0076 | 1.0367  | 1.0000  | 1.0000  |
| $p = 32, q = 2, V_{\text{rel}}(\Sigma) = 0.2$ |                                         |                                                 |        |        |        |         |         |         |
| $N = 4$                                       | 0.4706                                  | 0.1506                                          | 0.4771 | 0.4921 | 0.0964 | 15.8001 | 0.8662  | 0.7700  |
| $N = 8$                                       | 0.3264                                  | 0.0864                                          | 0.3271 | 0.3329 | 0.0703 | 6.4974  | 0.9990  | 0.9980  |
| $N = 16$                                      | 0.2618                                  | 0.0508                                          | 0.2609 | 0.2630 | 0.0454 | 1.8913  | 1.0000  | 1.0000  |
| $N = 32$                                      | 0.2306                                  | 0.0317                                          | 0.2300 | 0.2310 | 0.0305 | 0.8537  | 1.0000  | 1.0000  |
| $N = 64$                                      | 0.2152                                  | 0.0208                                          | 0.2153 | 0.2158 | 0.0207 | 1.9430  | 1.0000  | 1.0000  |
| $N = 128$                                     | 0.2076                                  | 0.0141                                          | 0.2075 | 0.2076 | 0.0141 | -0.0879 | 1.0000  | 1.0000  |
| $N = 256$                                     | 0.2038                                  | 0.0098                                          | 0.2038 | 0.2038 | 0.0096 | -0.1538 | 1.0000  | 1.0000  |
| $p = 32, q = 2, V_{\text{rel}}(\Sigma) = 0.4$ |                                         |                                                 |        |        |        |         |         |         |
| $N = 4$                                       | 0.6497                                  | 0.2088                                          | 0.6458 | 0.6505 | 0.1291 | 0.4379  | 0.9976  | 0.9916  |
| $N = 8$                                       | 0.5219                                  | 0.1118                                          | 0.5050 | 0.5229 | 0.0885 | 0.7836  | 1.0000  | 1.0000  |
| $N = 16$                                      | 0.4607                                  | 0.0578                                          | 0.4507 | 0.4615 | 0.0518 | 1.0509  | 1.0000  | 1.0000  |
| $N = 32$                                      | 0.4303                                  | 0.0303                                          | 0.4253 | 0.4303 | 0.0291 | -0.0698 | 1.0000  | 1.0000  |
| $N = 64$                                      | 0.4152                                  | 0.0166                                          | 0.4135 | 0.4153 | 0.0162 | 0.5373  | 1.0000  | 1.0000  |
| $N = 128$                                     | 0.4076                                  | 0.0095                                          | 0.4071 | 0.4076 | 0.0095 | 0.2889  | 1.0000  | 1.0000  |
| $N = 256$                                     | 0.4038                                  | 0.0058                                          | 0.4037 | 0.4039 | 0.0058 | 1.8489  | 1.0000  | 1.0000  |
| $p = 32, q = 4, V_{\text{rel}}(\Sigma) = 0.1$ |                                         |                                                 |        |        |        |         |         |         |
| $N = 4$                                       | 0.4304                                  | 0.0901                                          | 0.4220 | 0.4353 | 0.0680 | 5.1163  | 0.7372  | 0.5570  |
| $N = 8$                                       | 0.2485                                  | 0.0448                                          | 0.2434 | 0.2492 | 0.0396 | 1.2297  | 0.9980  | 0.9914  |
| $N = 16$                                      | 0.1708                                  | 0.0236                                          | 0.1696 | 0.1716 | 0.0223 | 2.5933  | 1.0000  | 1.0000  |
| $N = 32$                                      | 0.1346                                  | 0.0134                                          | 0.1341 | 0.1346 | 0.0132 | 0.2360  | 1.0000  | 1.0000  |
| $N = 64$                                      | 0.1171                                  | 0.0082                                          | 0.1171 | 0.1173 | 0.0081 | 1.2790  | 1.0000  | 1.0000  |
| $N = 128$                                     | 0.1085                                  | 0.0053                                          | 0.1085 | 0.1085 | 0.0053 | -0.2026 | 1.0000  | 1.0000  |
| $N = 256$                                     | 0.1042                                  | 0.0036                                          | 0.1042 | 0.1042 | 0.0035 | -0.3077 | 1.0000  | 1.0000  |
| $p = 32, q = 4, V_{\text{rel}}(\Sigma) = 0.2$ |                                         |                                                 |        |        |        |         |         |         |
| $N = 4$                                       | 0.5291                                  | 0.1397                                          | 0.5095 | 0.5278 | 0.1049 | -0.8747 | 0.9464  | 0.8860  |
| $N = 8$                                       | 0.3524                                  | 0.0674                                          | 0.3431 | 0.3521 | 0.0579 | -0.3826 | 1.0000  | 1.0000  |
| $N = 16$                                      | 0.2735                                  | 0.0326                                          | 0.2679 | 0.2727 | 0.0304 | -1.9324 | 1.0000  | 1.0000  |
| $N = 32$                                      | 0.2362                                  | 0.0161                                          | 0.2335 | 0.2357 | 0.0156 | -1.9882 | 1.0000  | 1.0000  |
| $N = 64$                                      | 0.2179                                  | 0.0081                                          | 0.2169 | 0.2179 | 0.0079 | -0.6360 | 1.0000  | 1.0000  |
| $N = 128$                                     | 0.2089                                  | 0.0042                                          | 0.2084 | 0.2090 | 0.0042 | 0.5130  | 1.0000  | 1.0000  |
| $N = 256$                                     | 0.2045                                  | 0.0022                                          | 0.2043 | 0.2045 | 0.0022 | 0.5881  | 1.0000  | 1.0000  |

(continued)

**Table S2.** (continued)

|                                                            | $\approx E[V_{\text{rel}}(\mathbf{S})]$ | $\approx \text{SD}[V_{\text{rel}}(\mathbf{S})]$ | Median | Mean   | ESD    | $T$     | Pow. 5% | Pow. 1% |
|------------------------------------------------------------|-----------------------------------------|-------------------------------------------------|--------|--------|--------|---------|---------|---------|
| $p = 64, q = 1, V_{\text{rel}}(\boldsymbol{\Sigma}) = 0.1$ |                                         |                                                 |        |        |        |         |         |         |
| $N = 4$                                                    | 0.3693                                  | 0.1331                                          | 0.3833 | 0.4049 | 0.0688 | 36.6235 | 0.6648  | 0.5412  |
| $N = 8$                                                    | 0.2232                                  | 0.0871                                          | 0.2177 | 0.2312 | 0.0609 | 9.2822  | 0.9624  | 0.9330  |
| $N = 16$                                                   | 0.1596                                  | 0.0565                                          | 0.1555 | 0.1614 | 0.0468 | 2.6219  | 1.0000  | 0.9996  |
| $N = 32$                                                   | 0.1294                                  | 0.0378                                          | 0.1264 | 0.1301 | 0.0344 | 1.4771  | 1.0000  | 1.0000  |
| $N = 64$                                                   | 0.1146                                  | 0.0260                                          | 0.1130 | 0.1146 | 0.0253 | -0.0493 | 1.0000  | 1.0000  |
| $N = 128$                                                  | 0.1073                                  | 0.0181                                          | 0.1065 | 0.1073 | 0.0175 | -0.0405 | 1.0000  | 1.0000  |
| $N = 256$                                                  | 0.1036                                  | 0.0127                                          | 0.1032 | 0.1037 | 0.0126 | 0.6022  | 1.0000  | 1.0000  |
| $p = 64, q = 1, V_{\text{rel}}(\boldsymbol{\Sigma}) = 0.2$ |                                         |                                                 |        |        |        |         |         |         |
| $N = 4$                                                    | 0.3788                                  | 0.1912                                          | 0.4356 | 0.4583 | 0.1014 | 55.4640 | 0.8090  | 0.7328  |
| $N = 8$                                                    | 0.2881                                  | 0.1330                                          | 0.2971 | 0.3077 | 0.0917 | 15.0979 | 0.9922  | 0.9844  |
| $N = 16$                                                   | 0.2450                                  | 0.0883                                          | 0.2472 | 0.2512 | 0.0732 | 6.0300  | 0.9998  | 0.9998  |
| $N = 32$                                                   | 0.2227                                  | 0.0598                                          | 0.2228 | 0.2247 | 0.0546 | 2.5121  | 1.0000  | 1.0000  |
| $N = 64$                                                   | 0.2114                                  | 0.0412                                          | 0.2098 | 0.2112 | 0.0392 | -0.3645 | 1.0000  | 1.0000  |
| $N = 128$                                                  | 0.2057                                  | 0.0288                                          | 0.2046 | 0.2053 | 0.0285 | -1.0540 | 1.0000  | 1.0000  |
| $N = 256$                                                  | 0.2029                                  | 0.0202                                          | 0.2025 | 0.2030 | 0.0200 | 0.2987  | 1.0000  | 1.0000  |
| $p = 64, q = 1, V_{\text{rel}}(\boldsymbol{\Sigma}) = 0.4$ |                                         |                                                 |        |        |        |         |         |         |
| $N = 4$                                                    | 0.4458                                  | 0.2090                                          | 0.5557 | 0.5594 | 0.1376 | 58.3687 | 0.9216  | 0.8926  |
| $N = 8$                                                    | 0.4264                                  | 0.1613                                          | 0.4670 | 0.4599 | 0.1273 | 18.6017 | 0.9980  | 0.9974  |
| $N = 16$                                                   | 0.4168                                  | 0.1119                                          | 0.4286 | 0.4266 | 0.0996 | 6.9651  | 1.0000  | 1.0000  |
| $N = 32$                                                   | 0.4095                                  | 0.0773                                          | 0.4125 | 0.4109 | 0.0726 | 1.3497  | 1.0000  | 1.0000  |
| $N = 64$                                                   | 0.4050                                  | 0.0538                                          | 0.4063 | 0.4056 | 0.0532 | 0.7287  | 1.0000  | 1.0000  |
| $N = 128$                                                  | 0.4026                                  | 0.0377                                          | 0.4041 | 0.4032 | 0.0371 | 1.1293  | 1.0000  | 1.0000  |
| $N = 256$                                                  | 0.4013                                  | 0.0266                                          | 0.4018 | 0.4015 | 0.0261 | 0.4964  | 1.0000  | 1.0000  |
| $p = 64, q = 1, V_{\text{rel}}(\boldsymbol{\Sigma}) = 0.6$ |                                         |                                                 |        |        |        |         |         |         |
| $N = 4$                                                    | 0.5867                                  | 0.1617                                          | 0.6883 | 0.6668 | 0.1510 | 37.5484 | 0.9718  | 0.9596  |
| $N = 8$                                                    | 0.5911                                  | 0.1364                                          | 0.6354 | 0.6177 | 0.1314 | 14.3427 | 0.9998  | 0.9998  |
| $N = 16$                                                   | 0.5983                                  | 0.0987                                          | 0.6151 | 0.6052 | 0.0974 | 5.0151  | 1.0000  | 1.0000  |
| $N = 32$                                                   | 0.6002                                  | 0.0695                                          | 0.6085 | 0.6022 | 0.0693 | 2.0323  | 1.0000  | 1.0000  |
| $N = 64$                                                   | 0.6004                                  | 0.0488                                          | 0.6039 | 0.6012 | 0.0484 | 1.1728  | 1.0000  | 1.0000  |
| $N = 128$                                                  | 0.6003                                  | 0.0344                                          | 0.6015 | 0.6002 | 0.0342 | -0.0756 | 1.0000  | 1.0000  |
| $N = 256$                                                  | 0.6001                                  | 0.0243                                          | 0.6009 | 0.6002 | 0.0241 | 0.2174  | 1.0000  | 1.0000  |
| $p = 64, q = 1, V_{\text{rel}}(\boldsymbol{\Sigma}) = 0.8$ |                                         |                                                 |        |        |        |         |         |         |
| $N = 4$                                                    | 0.7790                                  | 0.0864                                          | 0.8377 | 0.7928 | 0.1416 | 6.9078  | 0.9904  | 0.9854  |
| $N = 8$                                                    | 0.7837                                  | 0.0787                                          | 0.8157 | 0.7915 | 0.1022 | 5.4258  | 1.0000  | 1.0000  |
| $N = 16$                                                   | 0.7926                                  | 0.0592                                          | 0.8072 | 0.7956 | 0.0669 | 3.2349  | 1.0000  | 1.0000  |
| $N = 32$                                                   | 0.7967                                  | 0.0425                                          | 0.8021 | 0.7967 | 0.0447 | -0.0106 | 1.0000  | 1.0000  |
| $N = 64$                                                   | 0.7985                                  | 0.0301                                          | 0.8018 | 0.7989 | 0.0308 | 0.8231  | 1.0000  | 1.0000  |
| $N = 128$                                                  | 0.7993                                  | 0.0213                                          | 0.8012 | 0.7999 | 0.0216 | 1.8961  | 1.0000  | 1.0000  |
| $N = 256$                                                  | 0.7997                                  | 0.0151                                          | 0.8006 | 0.7996 | 0.0152 | -0.2806 | 1.0000  | 1.0000  |

(continued)

**Table S2.** (continued)

|                                               | $\approx E[V_{\text{rel}}(\mathbf{S})]$ | $\approx \text{SD}[V_{\text{rel}}(\mathbf{S})]$ | Median | Mean   | ESD    | $T$     | Pow. 5% | Pow. 1% |
|-----------------------------------------------|-----------------------------------------|-------------------------------------------------|--------|--------|--------|---------|---------|---------|
| $p = 64, q = 2, V_{\text{rel}}(\Sigma) = 0.1$ |                                         |                                                 |        |        |        |         |         |         |
| $N = 4$                                       | 0.4033                                  | 0.0983                                          | 0.4018 | 0.4170 | 0.0625 | 15.5134 | 0.8144  | 0.7052  |
| $N = 8$                                       | 0.2365                                  | 0.0577                                          | 0.2331 | 0.2394 | 0.0473 | 4.4814  | 0.9960  | 0.9914  |
| $N = 16$                                      | 0.1653                                  | 0.0352                                          | 0.1636 | 0.1662 | 0.0321 | 2.1126  | 1.0000  | 1.0000  |
| $N = 32$                                      | 0.1320                                  | 0.0227                                          | 0.1311 | 0.1319 | 0.0219 | -0.0435 | 1.0000  | 1.0000  |
| $N = 64$                                      | 0.1158                                  | 0.0153                                          | 0.1156 | 0.1159 | 0.0148 | 0.1625  | 1.0000  | 1.0000  |
| $N = 128$                                     | 0.1079                                  | 0.0105                                          | 0.1079 | 0.1080 | 0.0103 | 0.9248  | 1.0000  | 1.0000  |
| $N = 256$                                     | 0.1039                                  | 0.0073                                          | 0.1039 | 0.1040 | 0.0073 | 0.3798  | 1.0000  | 1.0000  |
| $p = 64, q = 2, V_{\text{rel}}(\Sigma) = 0.2$ |                                         |                                                 |        |        |        |         |         |         |
| $N = 4$                                       | 0.4672                                  | 0.1436                                          | 0.4719 | 0.4877 | 0.0920 | 15.6853 | 0.9534  | 0.9086  |
| $N = 8$                                       | 0.3244                                  | 0.0829                                          | 0.3238 | 0.3306 | 0.0666 | 6.5016  | 1.0000  | 1.0000  |
| $N = 16$                                      | 0.2607                                  | 0.0490                                          | 0.2589 | 0.2610 | 0.0449 | 0.4644  | 1.0000  | 1.0000  |
| $N = 32$                                      | 0.2300                                  | 0.0308                                          | 0.2295 | 0.2304 | 0.0297 | 0.7439  | 1.0000  | 1.0000  |
| $N = 64$                                      | 0.2149                                  | 0.0203                                          | 0.2148 | 0.2146 | 0.0197 | -1.1127 | 1.0000  | 1.0000  |
| $N = 128$                                     | 0.2075                                  | 0.0138                                          | 0.2075 | 0.2076 | 0.0138 | 0.9941  | 1.0000  | 1.0000  |
| $N = 256$                                     | 0.2037                                  | 0.0096                                          | 0.2038 | 0.2037 | 0.0095 | -0.4661 | 1.0000  | 1.0000  |
| $p = 64, q = 2, V_{\text{rel}}(\Sigma) = 0.4$ |                                         |                                                 |        |        |        |         |         |         |
| $N = 4$                                       | 0.6451                                  | 0.2025                                          | 0.6453 | 0.6520 | 0.1274 | 3.8135  | 0.9992  | 0.9986  |
| $N = 8$                                       | 0.5194                                  | 0.1086                                          | 0.4985 | 0.5178 | 0.0858 | -1.2882 | 1.0000  | 1.0000  |
| $N = 16$                                      | 0.4594                                  | 0.0563                                          | 0.4507 | 0.4604 | 0.0496 | 1.3591  | 1.0000  | 1.0000  |
| $N = 32$                                      | 0.4297                                  | 0.0299                                          | 0.4253 | 0.4303 | 0.0290 | 1.4675  | 1.0000  | 1.0000  |
| $N = 64$                                      | 0.4148                                  | 0.0165                                          | 0.4132 | 0.4149 | 0.0164 | 0.2356  | 1.0000  | 1.0000  |
| $N = 128$                                     | 0.4074                                  | 0.0097                                          | 0.4067 | 0.4072 | 0.0094 | -1.3898 | 1.0000  | 1.0000  |
| $N = 256$                                     | 0.4037                                  | 0.0060                                          | 0.4033 | 0.4036 | 0.0061 | -0.7394 | 1.0000  | 1.0000  |
| $p = 64, q = 4, V_{\text{rel}}(\Sigma) = 0.1$ |                                         |                                                 |        |        |        |         |         |         |
| $N = 4$                                       | 0.4254                                  | 0.0810                                          | 0.4164 | 0.4276 | 0.0588 | 2.6768  | 0.9004  | 0.8048  |
| $N = 8$                                       | 0.2456                                  | 0.0407                                          | 0.2411 | 0.2458 | 0.0350 | 0.4676  | 1.0000  | 1.0000  |
| $N = 16$                                      | 0.1693                                  | 0.0218                                          | 0.1676 | 0.1694 | 0.0203 | 0.4186  | 1.0000  | 1.0000  |
| $N = 32$                                      | 0.1338                                  | 0.0126                                          | 0.1333 | 0.1339 | 0.0123 | 0.2041  | 1.0000  | 1.0000  |
| $N = 64$                                      | 0.1167                                  | 0.0078                                          | 0.1167 | 0.1168 | 0.0079 | 0.6494  | 1.0000  | 1.0000  |
| $N = 128$                                     | 0.1083                                  | 0.0051                                          | 0.1083 | 0.1082 | 0.0051 | -1.1718 | 1.0000  | 1.0000  |
| $N = 256$                                     | 0.1041                                  | 0.0035                                          | 0.1042 | 0.1042 | 0.0035 | 0.2485  | 1.0000  | 1.0000  |
| $p = 64, q = 4, V_{\text{rel}}(\Sigma) = 0.2$ |                                         |                                                 |        |        |        |         |         |         |
| $N = 4$                                       | 0.5229                                  | 0.1312                                          | 0.5065 | 0.5241 | 0.0977 | 0.8973  | 0.9866  | 0.9726  |
| $N = 8$                                       | 0.3489                                  | 0.0633                                          | 0.3406 | 0.3487 | 0.0551 | -0.2548 | 1.0000  | 1.0000  |
| $N = 16$                                      | 0.2718                                  | 0.0307                                          | 0.2678 | 0.2719 | 0.0292 | 0.1980  | 1.0000  | 1.0000  |
| $N = 32$                                      | 0.2353                                  | 0.0153                                          | 0.2336 | 0.2353 | 0.0148 | 0.4010  | 1.0000  | 1.0000  |
| $N = 64$                                      | 0.2175                                  | 0.0079                                          | 0.2164 | 0.2175 | 0.0079 | 0.5288  | 1.0000  | 1.0000  |
| $N = 128$                                     | 0.2087                                  | 0.0042                                          | 0.2084 | 0.2088 | 0.0042 | 1.3044  | 1.0000  | 1.0000  |
| $N = 256$                                     | 0.2043                                  | 0.0024                                          | 0.2042 | 0.2043 | 0.0023 | 0.0456  | 1.0000  | 1.0000  |

(continued)

**Table S2.** (continued)

|                                                             | $\approx E[V_{\text{rel}}(\mathbf{S})]$ | $\approx \text{SD}[V_{\text{rel}}(\mathbf{S})]$ | Median | Mean   | ESD    | $T$     | Pow. 5% | Pow. 1% |
|-------------------------------------------------------------|-----------------------------------------|-------------------------------------------------|--------|--------|--------|---------|---------|---------|
| $p = 128, q = 1, V_{\text{rel}}(\boldsymbol{\Sigma}) = 0.1$ |                                         |                                                 |        |        |        |         |         |         |
| $N = 4$                                                     | 0.3678                                  | 0.1298                                          | 0.3805 | 0.4016 | 0.0662 | 36.1631 | 0.7914  | 0.7176  |
| $N = 8$                                                     | 0.2222                                  | 0.0851                                          | 0.2202 | 0.2319 | 0.0608 | 11.2526 | 0.9884  | 0.9816  |
| $N = 16$                                                    | 0.1591                                  | 0.0552                                          | 0.1554 | 0.1613 | 0.0462 | 3.3949  | 1.0000  | 1.0000  |
| $N = 32$                                                    | 0.1291                                  | 0.0370                                          | 0.1275 | 0.1301 | 0.0336 | 2.0940  | 1.0000  | 1.0000  |
| $N = 64$                                                    | 0.1144                                  | 0.0254                                          | 0.1125 | 0.1141 | 0.0244 | -0.8564 | 1.0000  | 1.0000  |
| $N = 128$                                                   | 0.1072                                  | 0.0177                                          | 0.1061 | 0.1070 | 0.0174 | -0.9694 | 1.0000  | 1.0000  |
| $N = 256$                                                   | 0.1036                                  | 0.0124                                          | 0.1035 | 0.1036 | 0.0122 | -0.0474 | 1.0000  | 1.0000  |
| $p = 128, q = 1, V_{\text{rel}}(\boldsymbol{\Sigma}) = 0.2$ |                                         |                                                 |        |        |        |         |         |         |
| $N = 4$                                                     | 0.3779                                  | 0.1886                                          | 0.4357 | 0.4560 | 0.0968 | 56.9972 | 0.8926  | 0.8560  |
| $N = 8$                                                     | 0.2876                                  | 0.1312                                          | 0.2974 | 0.3095 | 0.0922 | 16.8239 | 0.9976  | 0.9956  |
| $N = 16$                                                    | 0.2446                                  | 0.0871                                          | 0.2447 | 0.2497 | 0.0738 | 4.8935  | 1.0000  | 1.0000  |
| $N = 32$                                                    | 0.2226                                  | 0.0590                                          | 0.2220 | 0.2240 | 0.0534 | 1.8409  | 1.0000  | 1.0000  |
| $N = 64$                                                    | 0.2114                                  | 0.0407                                          | 0.2111 | 0.2119 | 0.0385 | 1.0824  | 1.0000  | 1.0000  |
| $N = 128$                                                   | 0.2057                                  | 0.0284                                          | 0.2055 | 0.2065 | 0.0279 | 1.9585  | 1.0000  | 1.0000  |
| $N = 256$                                                   | 0.2028                                  | 0.0199                                          | 0.2022 | 0.2027 | 0.0197 | -0.3729 | 1.0000  | 1.0000  |
| $p = 128, q = 1, V_{\text{rel}}(\boldsymbol{\Sigma}) = 0.4$ |                                         |                                                 |        |        |        |         |         |         |
| $N = 4$                                                     | 0.4453                                  | 0.2074                                          | 0.5559 | 0.5594 | 0.1346 | 59.9265 | 0.9670  | 0.9496  |
| $N = 8$                                                     | 0.4262                                  | 0.1601                                          | 0.4626 | 0.4578 | 0.1262 | 17.7102 | 0.9998  | 0.9996  |
| $N = 16$                                                    | 0.4167                                  | 0.1110                                          | 0.4252 | 0.4220 | 0.0981 | 3.8079  | 1.0000  | 1.0000  |
| $N = 32$                                                    | 0.4094                                  | 0.0766                                          | 0.4134 | 0.4124 | 0.0715 | 2.9484  | 1.0000  | 1.0000  |
| $N = 64$                                                    | 0.4050                                  | 0.0534                                          | 0.4051 | 0.4053 | 0.0515 | 0.4527  | 1.0000  | 1.0000  |
| $N = 128$                                                   | 0.4026                                  | 0.0374                                          | 0.4035 | 0.4024 | 0.0372 | -0.3393 | 1.0000  | 1.0000  |
| $N = 256$                                                   | 0.4013                                  | 0.0263                                          | 0.4022 | 0.4021 | 0.0258 | 2.1191  | 1.0000  | 1.0000  |
| $p = 128, q = 1, V_{\text{rel}}(\boldsymbol{\Sigma}) = 0.6$ |                                         |                                                 |        |        |        |         |         |         |
| $N = 4$                                                     | 0.5864                                  | 0.1608                                          | 0.6876 | 0.6652 | 0.1523 | 36.6050 | 0.9842  | 0.9788  |
| $N = 8$                                                     | 0.5910                                  | 0.1357                                          | 0.6346 | 0.6155 | 0.1327 | 13.0148 | 1.0000  | 1.0000  |
| $N = 16$                                                    | 0.5983                                  | 0.0981                                          | 0.6162 | 0.6051 | 0.0963 | 5.0064  | 1.0000  | 1.0000  |
| $N = 32$                                                    | 0.6001                                  | 0.0691                                          | 0.6069 | 0.6016 | 0.0696 | 1.4855  | 1.0000  | 1.0000  |
| $N = 64$                                                    | 0.6004                                  | 0.0485                                          | 0.6044 | 0.6011 | 0.0485 | 1.0441  | 1.0000  | 1.0000  |
| $N = 128$                                                   | 0.6003                                  | 0.0342                                          | 0.6023 | 0.6007 | 0.0339 | 0.8364  | 1.0000  | 1.0000  |
| $N = 256$                                                   | 0.6001                                  | 0.0241                                          | 0.6010 | 0.6001 | 0.0241 | -0.1653 | 1.0000  | 1.0000  |
| $p = 128, q = 1, V_{\text{rel}}(\boldsymbol{\Sigma}) = 0.8$ |                                         |                                                 |        |        |        |         |         |         |
| $N = 4$                                                     | 0.7789                                  | 0.0859                                          | 0.8372 | 0.7960 | 0.1372 | 8.7820  | 0.9956  | 0.9936  |
| $N = 8$                                                     | 0.7836                                  | 0.0783                                          | 0.8095 | 0.7880 | 0.1014 | 3.0677  | 1.0000  | 1.0000  |
| $N = 16$                                                    | 0.7926                                  | 0.0589                                          | 0.8052 | 0.7934 | 0.0665 | 0.8762  | 1.0000  | 1.0000  |
| $N = 32$                                                    | 0.7967                                  | 0.0423                                          | 0.8021 | 0.7970 | 0.0447 | 0.3646  | 1.0000  | 1.0000  |
| $N = 64$                                                    | 0.7985                                  | 0.0300                                          | 0.8018 | 0.7991 | 0.0311 | 1.3807  | 1.0000  | 1.0000  |
| $N = 128$                                                   | 0.7993                                  | 0.0212                                          | 0.8009 | 0.7996 | 0.0214 | 1.1186  | 1.0000  | 1.0000  |
| $N = 256$                                                   | 0.7997                                  | 0.0150                                          | 0.8000 | 0.7993 | 0.0151 | -1.7751 | 1.0000  | 1.0000  |

(continued)

**Table S2.** (continued)

|                                                | $\approx E[V_{\text{rel}}(\mathbf{S})]$ | $\approx \text{SD}[V_{\text{rel}}(\mathbf{S})]$ | Median | Mean   | ESD    | $T$     | Pow. 5% | Pow. 1% |
|------------------------------------------------|-----------------------------------------|-------------------------------------------------|--------|--------|--------|---------|---------|---------|
| $p = 128, q = 2, V_{\text{rel}}(\Sigma) = 0.1$ |                                         |                                                 |        |        |        |         |         |         |
| $N = 4$                                        | 0.4014                                  | 0.0943                                          | 0.3998 | 0.4133 | 0.0587 | 14.3539 | 0.9222  | 0.8732  |
| $N = 8$                                        | 0.2353                                  | 0.0557                                          | 0.2325 | 0.2385 | 0.0452 | 4.9532  | 0.9994  | 0.9988  |
| $N = 16$                                       | 0.1646                                  | 0.0341                                          | 0.1624 | 0.1650 | 0.0306 | 0.8469  | 1.0000  | 1.0000  |
| $N = 32$                                       | 0.1316                                  | 0.0221                                          | 0.1302 | 0.1313 | 0.0207 | -1.2201 | 1.0000  | 1.0000  |
| $N = 64$                                       | 0.1157                                  | 0.0149                                          | 0.1156 | 0.1160 | 0.0145 | 1.5574  | 1.0000  | 1.0000  |
| $N = 128$                                      | 0.1078                                  | 0.0103                                          | 0.1076 | 0.1079 | 0.0102 | 0.9428  | 1.0000  | 1.0000  |
| $N = 256$                                      | 0.1039                                  | 0.0072                                          | 0.1038 | 0.1039 | 0.0071 | 0.1376  | 1.0000  | 1.0000  |
| $p = 128, q = 2, V_{\text{rel}}(\Sigma) = 0.2$ |                                         |                                                 |        |        |        |         |         |         |
| $N = 4$                                        | 0.4656                                  | 0.1402                                          | 0.4709 | 0.4855 | 0.0889 | 15.7910 | 0.9894  | 0.9774  |
| $N = 8$                                        | 0.3235                                  | 0.0812                                          | 0.3232 | 0.3291 | 0.0663 | 5.9794  | 1.0000  | 1.0000  |
| $N = 16$                                       | 0.2602                                  | 0.0482                                          | 0.2586 | 0.2608 | 0.0442 | 1.0265  | 1.0000  | 1.0000  |
| $N = 32$                                       | 0.2298                                  | 0.0303                                          | 0.2290 | 0.2301 | 0.0288 | 0.8073  | 1.0000  | 1.0000  |
| $N = 64$                                       | 0.2148                                  | 0.0200                                          | 0.2149 | 0.2147 | 0.0199 | -0.2697 | 1.0000  | 1.0000  |
| $N = 128$                                      | 0.2074                                  | 0.0137                                          | 0.2074 | 0.2074 | 0.0137 | 0.2450  | 1.0000  | 1.0000  |
| $N = 256$                                      | 0.2037                                  | 0.0095                                          | 0.2039 | 0.2037 | 0.0095 | -0.0761 | 1.0000  | 1.0000  |
| $p = 128, q = 2, V_{\text{rel}}(\Sigma) = 0.4$ |                                         |                                                 |        |        |        |         |         |         |
| $N = 4$                                        | 0.6429                                  | 0.1994                                          | 0.6451 | 0.6482 | 0.1253 | 2.9897  | 0.9998  | 0.9990  |
| $N = 8$                                        | 0.5182                                  | 0.1070                                          | 0.5029 | 0.5197 | 0.0852 | 1.2226  | 1.0000  | 1.0000  |
| $N = 16$                                       | 0.4588                                  | 0.0557                                          | 0.4479 | 0.4586 | 0.0500 | -0.2879 | 1.0000  | 1.0000  |
| $N = 32$                                       | 0.4294                                  | 0.0296                                          | 0.4251 | 0.4294 | 0.0286 | 0.0105  | 1.0000  | 1.0000  |
| $N = 64$                                       | 0.4147                                  | 0.0165                                          | 0.4133 | 0.4148 | 0.0161 | 0.5386  | 1.0000  | 1.0000  |
| $N = 128$                                      | 0.4073                                  | 0.0097                                          | 0.4069 | 0.4073 | 0.0098 | -0.1664 | 1.0000  | 1.0000  |
| $N = 256$                                      | 0.4037                                  | 0.0061                                          | 0.4036 | 0.4037 | 0.0061 | 0.9004  | 1.0000  | 1.0000  |
| $p = 128, q = 4, V_{\text{rel}}(\Sigma) = 0.1$ |                                         |                                                 |        |        |        |         |         |         |
| $N = 4$                                        | 0.4230                                  | 0.0766                                          | 0.4169 | 0.4273 | 0.0555 | 5.4744  | 0.9766  | 0.9560  |
| $N = 8$                                        | 0.2441                                  | 0.0387                                          | 0.2396 | 0.2444 | 0.0342 | 0.5399  | 1.0000  | 1.0000  |
| $N = 16$                                       | 0.1685                                  | 0.0209                                          | 0.1674 | 0.1690 | 0.0196 | 1.6338  | 1.0000  | 1.0000  |
| $N = 32$                                       | 0.1334                                  | 0.0122                                          | 0.1328 | 0.1334 | 0.0119 | -0.2881 | 1.0000  | 1.0000  |
| $N = 64$                                       | 0.1165                                  | 0.0076                                          | 0.1164 | 0.1165 | 0.0076 | -0.6600 | 1.0000  | 1.0000  |
| $N = 128$                                      | 0.1082                                  | 0.0050                                          | 0.1081 | 0.1082 | 0.0050 | -0.6723 | 1.0000  | 1.0000  |
| $N = 256$                                      | 0.1041                                  | 0.0034                                          | 0.1040 | 0.1040 | 0.0034 | -1.7921 | 1.0000  | 1.0000  |
| $p = 128, q = 4, V_{\text{rel}}(\Sigma) = 0.2$ |                                         |                                                 |        |        |        |         |         |         |
| $N = 4$                                        | 0.5199                                  | 0.1270                                          | 0.5004 | 0.5186 | 0.0928 | -0.9804 | 0.9976  | 0.9954  |
| $N = 8$                                        | 0.3473                                  | 0.0613                                          | 0.3401 | 0.3480 | 0.0527 | 0.9132  | 1.0000  | 1.0000  |
| $N = 16$                                       | 0.2709                                  | 0.0298                                          | 0.2678 | 0.2714 | 0.0275 | 1.0597  | 1.0000  | 1.0000  |
| $N = 32$                                       | 0.2348                                  | 0.0150                                          | 0.2329 | 0.2348 | 0.0145 | -0.2822 | 1.0000  | 1.0000  |
| $N = 64$                                       | 0.2173                                  | 0.0078                                          | 0.2164 | 0.2172 | 0.0076 | -0.5165 | 1.0000  | 1.0000  |
| $N = 128$                                      | 0.2086                                  | 0.0042                                          | 0.2084 | 0.2087 | 0.0042 | 0.9662  | 1.0000  | 1.0000  |
| $N = 256$                                      | 0.2043                                  | 0.0024                                          | 0.2042 | 0.2043 | 0.0024 | -0.3874 | 1.0000  | 1.0000  |

(continued)

**Table S2.** (continued)

|                                                             | $\approx E[V_{\text{rel}}(\mathbf{S})]$ | $\approx \text{SD}[V_{\text{rel}}(\mathbf{S})]$ | Median | Mean   | ESD    | $T$     | Pow. 5% | Pow. 1% |
|-------------------------------------------------------------|-----------------------------------------|-------------------------------------------------|--------|--------|--------|---------|---------|---------|
| $p = 256, q = 1, V_{\text{rel}}(\boldsymbol{\Sigma}) = 0.1$ |                                         |                                                 |        |        |        |         |         |         |
| $N = 4$                                                     | 0.3670                                  | 0.1282                                          | 0.3802 | 0.4010 | 0.0649 | 36.9664 | 0.8680  | 0.8214  |
| $N = 8$                                                     | 0.2217                                  | 0.0841                                          | 0.2161 | 0.2282 | 0.0586 | 7.8635  | 0.9948  | 0.9910  |
| $N = 16$                                                    | 0.1588                                  | 0.0546                                          | 0.1547 | 0.1603 | 0.0443 | 2.3327  | 1.0000  | 1.0000  |
| $N = 32$                                                    | 0.1289                                  | 0.0366                                          | 0.1252 | 0.1283 | 0.0328 | -1.3113 | 1.0000  | 1.0000  |
| $N = 64$                                                    | 0.1144                                  | 0.0252                                          | 0.1131 | 0.1145 | 0.0238 | 0.5640  | 1.0000  | 1.0000  |
| $N = 128$                                                   | 0.1072                                  | 0.0175                                          | 0.1067 | 0.1072 | 0.0171 | 0.0656  | 1.0000  | 1.0000  |
| $N = 256$                                                   | 0.1036                                  | 0.0123                                          | 0.1029 | 0.1035 | 0.0123 | -0.2719 | 1.0000  | 1.0000  |
| $p = 256, q = 1, V_{\text{rel}}(\boldsymbol{\Sigma}) = 0.2$ |                                         |                                                 |        |        |        |         |         |         |
| $N = 4$                                                     | 0.3775                                  | 0.1873                                          | 0.4345 | 0.4545 | 0.0960 | 56.7566 | 0.9408  | 0.9150  |
| $N = 8$                                                     | 0.2873                                  | 0.1303                                          | 0.2947 | 0.3059 | 0.0906 | 14.5168 | 0.9998  | 0.9996  |
| $N = 16$                                                    | 0.2445                                  | 0.0865                                          | 0.2439 | 0.2494 | 0.0717 | 4.8522  | 1.0000  | 1.0000  |
| $N = 32$                                                    | 0.2225                                  | 0.0586                                          | 0.2207 | 0.2230 | 0.0532 | 0.7110  | 1.0000  | 1.0000  |
| $N = 64$                                                    | 0.2113                                  | 0.0404                                          | 0.2113 | 0.2117 | 0.0393 | 0.7681  | 1.0000  | 1.0000  |
| $N = 128$                                                   | 0.2057                                  | 0.0282                                          | 0.2060 | 0.2063 | 0.0273 | 1.6400  | 1.0000  | 1.0000  |
| $N = 256$                                                   | 0.2028                                  | 0.0198                                          | 0.2025 | 0.2030 | 0.0195 | 0.6016  | 1.0000  | 1.0000  |
| $p = 256, q = 1, V_{\text{rel}}(\boldsymbol{\Sigma}) = 0.4$ |                                         |                                                 |        |        |        |         |         |         |
| $N = 4$                                                     | 0.4451                                  | 0.2066                                          | 0.5553 | 0.5569 | 0.1336 | 59.1992 | 0.9778  | 0.9692  |
| $N = 8$                                                     | 0.4261                                  | 0.1594                                          | 0.4637 | 0.4606 | 0.1249 | 19.5222 | 1.0000  | 1.0000  |
| $N = 16$                                                    | 0.4166                                  | 0.1105                                          | 0.4262 | 0.4228 | 0.0977 | 4.4222  | 1.0000  | 1.0000  |
| $N = 32$                                                    | 0.4094                                  | 0.0763                                          | 0.4148 | 0.4120 | 0.0718 | 2.5791  | 1.0000  | 1.0000  |
| $N = 64$                                                    | 0.4050                                  | 0.0531                                          | 0.4066 | 0.4058 | 0.0520 | 1.1405  | 1.0000  | 1.0000  |
| $N = 128$                                                   | 0.4026                                  | 0.0373                                          | 0.4017 | 0.4021 | 0.0365 | -0.8094 | 1.0000  | 1.0000  |
| $N = 256$                                                   | 0.4013                                  | 0.0262                                          | 0.4020 | 0.4016 | 0.0260 | 0.7194  | 1.0000  | 1.0000  |
| $p = 256, q = 1, V_{\text{rel}}(\boldsymbol{\Sigma}) = 0.6$ |                                         |                                                 |        |        |        |         |         |         |
| $N = 4$                                                     | 0.5863                                  | 0.1603                                          | 0.6891 | 0.6644 | 0.1489 | 37.1120 | 0.9924  | 0.9878  |
| $N = 8$                                                     | 0.5910                                  | 0.1353                                          | 0.6340 | 0.6178 | 0.1277 | 14.8192 | 0.9998  | 0.9998  |
| $N = 16$                                                    | 0.5983                                  | 0.0978                                          | 0.6147 | 0.6052 | 0.0952 | 5.1681  | 1.0000  | 1.0000  |
| $N = 32$                                                    | 0.6001                                  | 0.0689                                          | 0.6085 | 0.6029 | 0.0685 | 2.8470  | 1.0000  | 1.0000  |
| $N = 64$                                                    | 0.6004                                  | 0.0484                                          | 0.6027 | 0.5997 | 0.0483 | -0.9421 | 1.0000  | 1.0000  |
| $N = 128$                                                   | 0.6003                                  | 0.0341                                          | 0.6019 | 0.6002 | 0.0342 | -0.0204 | 1.0000  | 1.0000  |
| $N = 256$                                                   | 0.6001                                  | 0.0240                                          | 0.6008 | 0.6002 | 0.0240 | 0.0870  | 1.0000  | 1.0000  |
| $p = 256, q = 1, V_{\text{rel}}(\boldsymbol{\Sigma}) = 0.8$ |                                         |                                                 |        |        |        |         |         |         |
| $N = 4$                                                     | 0.7789                                  | 0.0857                                          | 0.8347 | 0.7932 | 0.1395 | 7.2244  | 0.9968  | 0.9958  |
| $N = 8$                                                     | 0.7836                                  | 0.0781                                          | 0.8150 | 0.7930 | 0.0994 | 6.6508  | 1.0000  | 1.0000  |
| $N = 16$                                                    | 0.7926                                  | 0.0588                                          | 0.8058 | 0.7944 | 0.0663 | 1.9392  | 1.0000  | 1.0000  |
| $N = 32$                                                    | 0.7967                                  | 0.0422                                          | 0.8033 | 0.7976 | 0.0455 | 1.3138  | 1.0000  | 1.0000  |
| $N = 64$                                                    | 0.7985                                  | 0.0299                                          | 0.8010 | 0.7983 | 0.0303 | -0.5863 | 1.0000  | 1.0000  |
| $N = 128$                                                   | 0.7993                                  | 0.0212                                          | 0.8010 | 0.7995 | 0.0212 | 0.7960  | 1.0000  | 1.0000  |
| $N = 256$                                                   | 0.7997                                  | 0.0150                                          | 0.8004 | 0.7998 | 0.0153 | 0.5080  | 1.0000  | 1.0000  |

(continued)

**Table S2.** (continued)

|                                                | $\approx E[V_{\text{rel}}(\mathbf{S})]$ | $\approx \text{SD}[V_{\text{rel}}(\mathbf{S})]$ | Median | Mean   | ESD    | $T$     | Pow. 5% | Pow. 1% |
|------------------------------------------------|-----------------------------------------|-------------------------------------------------|--------|--------|--------|---------|---------|---------|
| $p = 256, q = 2, V_{\text{rel}}(\Sigma) = 0.1$ |                                         |                                                 |        |        |        |         |         |         |
| $N = 4$                                        | 0.4005                                  | 0.0923                                          | 0.3999 | 0.4120 | 0.0570 | 14.2491 | 0.9688  | 0.9502  |
| $N = 8$                                        | 0.2347                                  | 0.0547                                          | 0.2321 | 0.2380 | 0.0440 | 5.3249  | 1.0000  | 1.0000  |
| $N = 16$                                       | 0.1643                                  | 0.0336                                          | 0.1618 | 0.1640 | 0.0302 | -0.6560 | 1.0000  | 1.0000  |
| $N = 32$                                       | 0.1315                                  | 0.0218                                          | 0.1301 | 0.1312 | 0.0204 | -0.8040 | 1.0000  | 1.0000  |
| $N = 64$                                       | 0.1156                                  | 0.0147                                          | 0.1149 | 0.1157 | 0.0144 | 0.4099  | 1.0000  | 1.0000  |
| $N = 128$                                      | 0.1077                                  | 0.0101                                          | 0.1074 | 0.1076 | 0.0101 | -0.9266 | 1.0000  | 1.0000  |
| $N = 256$                                      | 0.1039                                  | 0.0071                                          | 0.1039 | 0.1040 | 0.0071 | 1.4076  | 1.0000  | 1.0000  |
| $p = 256, q = 2, V_{\text{rel}}(\Sigma) = 0.2$ |                                         |                                                 |        |        |        |         |         |         |
| $N = 4$                                        | 0.4648                                  | 0.1385                                          | 0.4678 | 0.4835 | 0.0865 | 15.2564 | 0.9948  | 0.9912  |
| $N = 8$                                        | 0.3230                                  | 0.0803                                          | 0.3213 | 0.3272 | 0.0645 | 4.5921  | 1.0000  | 1.0000  |
| $N = 16$                                       | 0.2599                                  | 0.0478                                          | 0.2587 | 0.2606 | 0.0430 | 1.0712  | 1.0000  | 1.0000  |
| $N = 32$                                       | 0.2296                                  | 0.0301                                          | 0.2296 | 0.2295 | 0.0289 | -0.2494 | 1.0000  | 1.0000  |
| $N = 64$                                       | 0.2147                                  | 0.0199                                          | 0.2145 | 0.2146 | 0.0197 | -0.4946 | 1.0000  | 1.0000  |
| $N = 128$                                      | 0.2074                                  | 0.0136                                          | 0.2074 | 0.2076 | 0.0133 | 1.2036  | 1.0000  | 1.0000  |
| $N = 256$                                      | 0.2037                                  | 0.0094                                          | 0.2037 | 0.2036 | 0.0094 | -0.3174 | 1.0000  | 1.0000  |
| $p = 256, q = 2, V_{\text{rel}}(\Sigma) = 0.4$ |                                         |                                                 |        |        |        |         |         |         |
| $N = 4$                                        | 0.6418                                  | 0.1979                                          | 0.6414 | 0.6484 | 0.1237 | 3.7632  | 0.9998  | 0.9996  |
| $N = 8$                                        | 0.5176                                  | 0.1062                                          | 0.4989 | 0.5166 | 0.0846 | -0.8435 | 1.0000  | 1.0000  |
| $N = 16$                                       | 0.4585                                  | 0.0553                                          | 0.4502 | 0.4599 | 0.0496 | 2.0152  | 1.0000  | 1.0000  |
| $N = 32$                                       | 0.4292                                  | 0.0295                                          | 0.4255 | 0.4294 | 0.0276 | 0.4661  | 1.0000  | 1.0000  |
| $N = 64$                                       | 0.4146                                  | 0.0165                                          | 0.4129 | 0.4145 | 0.0159 | -0.5531 | 1.0000  | 1.0000  |
| $N = 128$                                      | 0.4073                                  | 0.0097                                          | 0.4068 | 0.4072 | 0.0096 | -0.8852 | 1.0000  | 1.0000  |
| $N = 256$                                      | 0.4036                                  | 0.0061                                          | 0.4037 | 0.4037 | 0.0062 | 1.0291  | 1.0000  | 1.0000  |
| $p = 256, q = 4, V_{\text{rel}}(\Sigma) = 0.1$ |                                         |                                                 |        |        |        |         |         |         |
| $N = 4$                                        | 0.4218                                  | 0.0744                                          | 0.4150 | 0.4253 | 0.0544 | 4.6252  | 0.9958  | 0.9918  |
| $N = 8$                                        | 0.2434                                  | 0.0377                                          | 0.2390 | 0.2431 | 0.0321 | -0.6534 | 1.0000  | 1.0000  |
| $N = 16$                                       | 0.1682                                  | 0.0204                                          | 0.1663 | 0.1679 | 0.0187 | -1.0115 | 1.0000  | 1.0000  |
| $N = 32$                                       | 0.1333                                  | 0.0120                                          | 0.1324 | 0.1331 | 0.0116 | -1.1964 | 1.0000  | 1.0000  |
| $N = 64$                                       | 0.1164                                  | 0.0075                                          | 0.1164 | 0.1165 | 0.0075 | 1.0008  | 1.0000  | 1.0000  |
| $N = 128$                                      | 0.1082                                  | 0.0050                                          | 0.1082 | 0.1081 | 0.0049 | -0.3841 | 1.0000  | 1.0000  |
| $N = 256$                                      | 0.1041                                  | 0.0034                                          | 0.1041 | 0.1041 | 0.0034 | 1.4474  | 1.0000  | 1.0000  |
| $p = 256, q = 4, V_{\text{rel}}(\Sigma) = 0.2$ |                                         |                                                 |        |        |        |         |         |         |
| $N = 4$                                        | 0.5184                                  | 0.1250                                          | 0.5027 | 0.5188 | 0.0921 | 0.2504  | 0.9990  | 0.9986  |
| $N = 8$                                        | 0.3465                                  | 0.0603                                          | 0.3376 | 0.3459 | 0.0517 | -0.8305 | 1.0000  | 1.0000  |
| $N = 16$                                       | 0.2705                                  | 0.0294                                          | 0.2673 | 0.2711 | 0.0278 | 1.3770  | 1.0000  | 1.0000  |
| $N = 32$                                       | 0.2346                                  | 0.0148                                          | 0.2332 | 0.2350 | 0.0146 | 2.0066  | 1.0000  | 1.0000  |
| $N = 64$                                       | 0.2172                                  | 0.0078                                          | 0.2164 | 0.2171 | 0.0076 | -0.2420 | 1.0000  | 1.0000  |
| $N = 128$                                      | 0.2085                                  | 0.0043                                          | 0.2082 | 0.2086 | 0.0043 | 0.4033  | 1.0000  | 1.0000  |
| $N = 256$                                      | 0.2043                                  | 0.0025                                          | 0.2042 | 0.2043 | 0.0025 | 0.7756  | 1.0000  | 1.0000  |

(continued)



**Table S2.** (continued)

|                                                 | $\approx E[V_{\text{rel}}(\mathbf{S})]$ | $\approx \text{SD}[V_{\text{rel}}(\mathbf{S})]$ | Median | Mean   | ESD    | $T$     | Pow. 5% | Pow. 1% |
|-------------------------------------------------|-----------------------------------------|-------------------------------------------------|--------|--------|--------|---------|---------|---------|
| $p = 1024, q = 1, V_{\text{rel}}(\Sigma) = 0.1$ |                                         |                                                 |        |        |        |         |         |         |
| $N = 4$                                         | 0.3664                                  | 0.1269                                          | 0.3824 | 0.4005 | 0.0628 | 38.3853 | 0.9530  | 0.9368  |
| $N = 8$                                         | 0.2214                                  | 0.0834                                          | 0.2187 | 0.2300 | 0.0594 | 10.3495 | 0.9996  | 0.9992  |
| $N = 16$                                        | 0.1586                                  | 0.0541                                          | 0.1546 | 0.1604 | 0.0450 | 2.7974  | 1.0000  | 1.0000  |
| $N = 32$                                        | 0.1288                                  | 0.0363                                          | 0.1252 | 0.1288 | 0.0327 | -0.1243 | 1.0000  | 1.0000  |
| $N = 64$                                        | 0.1143                                  | 0.0250                                          | 0.1129 | 0.1144 | 0.0239 | 0.3962  | 1.0000  | 1.0000  |
| $N = 128$                                       | 0.1071                                  | 0.0174                                          | 0.1061 | 0.1068 | 0.0168 | -1.3612 | 1.0000  | 1.0000  |
| $N = 256$                                       | 0.1036                                  | 0.0122                                          | 0.1030 | 0.1034 | 0.0121 | -0.9759 | 1.0000  | 1.0000  |
| $p = 1024, q = 1, V_{\text{rel}}(\Sigma) = 0.2$ |                                         |                                                 |        |        |        |         |         |         |
| $N = 4$                                         | 0.3772                                  | 0.1863                                          | 0.4316 | 0.4538 | 0.0966 | 56.1171 | 0.9792  | 0.9712  |
| $N = 8$                                         | 0.2871                                  | 0.1296                                          | 0.2968 | 0.3061 | 0.0902 | 14.9086 | 1.0000  | 1.0000  |
| $N = 16$                                        | 0.2443                                  | 0.0860                                          | 0.2460 | 0.2502 | 0.0711 | 5.8614  | 1.0000  | 1.0000  |
| $N = 32$                                        | 0.2224                                  | 0.0583                                          | 0.2206 | 0.2229 | 0.0530 | 0.6929  | 1.0000  | 1.0000  |
| $N = 64$                                        | 0.2113                                  | 0.0402                                          | 0.2110 | 0.2121 | 0.0385 | 1.4655  | 1.0000  | 1.0000  |
| $N = 128$                                       | 0.2057                                  | 0.0281                                          | 0.2044 | 0.2049 | 0.0273 | -2.0171 | 1.0000  | 1.0000  |
| $N = 256$                                       | 0.2028                                  | 0.0197                                          | 0.2019 | 0.2022 | 0.0194 | -2.1194 | 1.0000  | 1.0000  |
| $p = 1024, q = 1, V_{\text{rel}}(\Sigma) = 0.4$ |                                         |                                                 |        |        |        |         |         |         |
| $N = 4$                                         | 0.4449                                  | 0.2060                                          | 0.5508 | 0.5536 | 0.1326 | 57.9415 | 0.9934  | 0.9894  |
| $N = 8$                                         | 0.4261                                  | 0.1590                                          | 0.4566 | 0.4548 | 0.1261 | 16.1041 | 1.0000  | 1.0000  |
| $N = 16$                                        | 0.4166                                  | 0.1102                                          | 0.4272 | 0.4246 | 0.0990 | 5.7314  | 1.0000  | 1.0000  |
| $N = 32$                                        | 0.4094                                  | 0.0761                                          | 0.4140 | 0.4123 | 0.0718 | 2.8690  | 1.0000  | 1.0000  |
| $N = 64$                                        | 0.4050                                  | 0.0530                                          | 0.4068 | 0.4058 | 0.0521 | 1.1494  | 1.0000  | 1.0000  |
| $N = 128$                                       | 0.4026                                  | 0.0371                                          | 0.4024 | 0.4024 | 0.0366 | -0.2967 | 1.0000  | 1.0000  |
| $N = 256$                                       | 0.4013                                  | 0.0261                                          | 0.4024 | 0.4016 | 0.0263 | 0.7143  | 1.0000  | 1.0000  |
| $p = 1024, q = 1, V_{\text{rel}}(\Sigma) = 0.6$ |                                         |                                                 |        |        |        |         |         |         |
| $N = 4$                                         | 0.5862                                  | 0.1600                                          | 0.6832 | 0.6637 | 0.1492 | 36.7630 | 0.9966  | 0.9950  |
| $N = 8$                                         | 0.5910                                  | 0.1350                                          | 0.6344 | 0.6160 | 0.1281 | 13.8435 | 1.0000  | 1.0000  |
| $N = 16$                                        | 0.5983                                  | 0.0976                                          | 0.6170 | 0.6051 | 0.0949 | 5.0647  | 1.0000  | 1.0000  |
| $N = 32$                                        | 0.6001                                  | 0.0687                                          | 0.6076 | 0.6012 | 0.0692 | 1.0874  | 1.0000  | 1.0000  |
| $N = 64$                                        | 0.6004                                  | 0.0483                                          | 0.6040 | 0.6005 | 0.0476 | 0.1575  | 1.0000  | 1.0000  |
| $N = 128$                                       | 0.6003                                  | 0.0340                                          | 0.6016 | 0.6005 | 0.0334 | 0.5738  | 1.0000  | 1.0000  |
| $N = 256$                                       | 0.6001                                  | 0.0240                                          | 0.6006 | 0.6000 | 0.0240 | -0.4044 | 1.0000  | 1.0000  |
| $p = 1024, q = 1, V_{\text{rel}}(\Sigma) = 0.8$ |                                         |                                                 |        |        |        |         |         |         |
| $N = 4$                                         | 0.7789                                  | 0.0855                                          | 0.8366 | 0.7933 | 0.1392 | 7.3423  | 0.9990  | 0.9986  |
| $N = 8$                                         | 0.7836                                  | 0.0780                                          | 0.8140 | 0.7904 | 0.1011 | 4.7652  | 1.0000  | 1.0000  |
| $N = 16$                                        | 0.7926                                  | 0.0587                                          | 0.8081 | 0.7959 | 0.0665 | 3.5530  | 1.0000  | 1.0000  |
| $N = 32$                                        | 0.7967                                  | 0.0421                                          | 0.8026 | 0.7967 | 0.0448 | -0.0218 | 1.0000  | 1.0000  |
| $N = 64$                                        | 0.7985                                  | 0.0299                                          | 0.8012 | 0.7987 | 0.0307 | 0.4338  | 1.0000  | 1.0000  |
| $N = 128$                                       | 0.7993                                  | 0.0211                                          | 0.8009 | 0.7991 | 0.0220 | -0.6352 | 1.0000  | 1.0000  |
| $N = 256$                                       | 0.7997                                  | 0.0149                                          | 0.7996 | 0.7991 | 0.0154 | -2.7295 | 1.0000  | 1.0000  |

(continued)

**Table S2.** (continued)

|                                                 | $\approx E[V_{\text{rel}}(\mathbf{S})]$ | $\approx \text{SD}[V_{\text{rel}}(\mathbf{S})]$ | Median | Mean   | ESD    | $T$     | Pow. 5% | Pow. 1% |
|-------------------------------------------------|-----------------------------------------|-------------------------------------------------|--------|--------|--------|---------|---------|---------|
| $p = 1024, q = 2, V_{\text{rel}}(\Sigma) = 0.1$ |                                         |                                                 |        |        |        |         |         |         |
| $N = 4$                                         | 0.3998                                  | 0.0908                                          | 0.4004 | 0.4135 | 0.0570 | 16.9530 | 0.9966  | 0.9932  |
| $N = 8$                                         | 0.2343                                  | 0.0540                                          | 0.2310 | 0.2367 | 0.0428 | 3.9784  | 1.0000  | 1.0000  |
| $N = 16$                                        | 0.1641                                  | 0.0332                                          | 0.1618 | 0.1645 | 0.0300 | 0.8667  | 1.0000  | 1.0000  |
| $N = 32$                                        | 0.1314                                  | 0.0216                                          | 0.1304 | 0.1312 | 0.0205 | -0.3665 | 1.0000  | 1.0000  |
| $N = 64$                                        | 0.1155                                  | 0.0146                                          | 0.1157 | 0.1158 | 0.0143 | 1.6711  | 1.0000  | 1.0000  |
| $N = 128$                                       | 0.1077                                  | 0.0101                                          | 0.1076 | 0.1078 | 0.0098 | 0.6646  | 1.0000  | 1.0000  |
| $N = 256$                                       | 0.1038                                  | 0.0070                                          | 0.1038 | 0.1039 | 0.0070 | 0.2842  | 1.0000  | 1.0000  |
| $p = 1024, q = 2, V_{\text{rel}}(\Sigma) = 0.2$ |                                         |                                                 |        |        |        |         |         |         |
| $N = 4$                                         | 0.4642                                  | 0.1372                                          | 0.4699 | 0.4843 | 0.0868 | 16.3768 | 0.9992  | 0.9988  |
| $N = 8$                                         | 0.3226                                  | 0.0797                                          | 0.3230 | 0.3279 | 0.0648 | 5.7031  | 1.0000  | 1.0000  |
| $N = 16$                                        | 0.2597                                  | 0.0474                                          | 0.2583 | 0.2605 | 0.0433 | 1.1566  | 1.0000  | 1.0000  |
| $N = 32$                                        | 0.2295                                  | 0.0300                                          | 0.2301 | 0.2302 | 0.0291 | 1.5109  | 1.0000  | 1.0000  |
| $N = 64$                                        | 0.2147                                  | 0.0198                                          | 0.2143 | 0.2143 | 0.0195 | -1.2399 | 1.0000  | 1.0000  |
| $N = 128$                                       | 0.2073                                  | 0.0135                                          | 0.2074 | 0.2073 | 0.0132 | -0.3207 | 1.0000  | 1.0000  |
| $N = 256$                                       | 0.2037                                  | 0.0094                                          | 0.2039 | 0.2038 | 0.0093 | 0.8660  | 1.0000  | 1.0000  |
| $p = 1024, q = 2, V_{\text{rel}}(\Sigma) = 0.4$ |                                         |                                                 |        |        |        |         |         |         |
| $N = 4$                                         | 0.6410                                  | 0.1968                                          | 0.6318 | 0.6431 | 0.1222 | 1.2092  | 1.0000  | 1.0000  |
| $N = 8$                                         | 0.5171                                  | 0.1057                                          | 0.5005 | 0.5176 | 0.0835 | 0.3728  | 1.0000  | 1.0000  |
| $N = 16$                                        | 0.4583                                  | 0.0551                                          | 0.4494 | 0.4586 | 0.0495 | 0.5014  | 1.0000  | 1.0000  |
| $N = 32$                                        | 0.4291                                  | 0.0294                                          | 0.4251 | 0.4290 | 0.0284 | -0.1381 | 1.0000  | 1.0000  |
| $N = 64$                                        | 0.4145                                  | 0.0165                                          | 0.4133 | 0.4146 | 0.0159 | 0.1152  | 1.0000  | 1.0000  |
| $N = 128$                                       | 0.4073                                  | 0.0098                                          | 0.4072 | 0.4075 | 0.0096 | 1.4718  | 1.0000  | 1.0000  |
| $N = 256$                                       | 0.4036                                  | 0.0061                                          | 0.4035 | 0.4037 | 0.0061 | 0.6990  | 1.0000  | 1.0000  |
| $p = 1024, q = 4, V_{\text{rel}}(\Sigma) = 0.1$ |                                         |                                                 |        |        |        |         |         |         |
| $N = 4$                                         | 0.4209                                  | 0.0727                                          | 0.4147 | 0.4244 | 0.0526 | 4.6637  | 0.9998  | 0.9998  |
| $N = 8$                                         | 0.2429                                  | 0.0370                                          | 0.2400 | 0.2444 | 0.0329 | 3.3100  | 1.0000  | 1.0000  |
| $N = 16$                                        | 0.1679                                  | 0.0201                                          | 0.1664 | 0.1681 | 0.0194 | 1.0058  | 1.0000  | 1.0000  |
| $N = 32$                                        | 0.1331                                  | 0.0118                                          | 0.1324 | 0.1329 | 0.0117 | -1.3092 | 1.0000  | 1.0000  |
| $N = 64$                                        | 0.1164                                  | 0.0075                                          | 0.1161 | 0.1162 | 0.0074 | -1.8472 | 1.0000  | 1.0000  |
| $N = 128$                                       | 0.1081                                  | 0.0049                                          | 0.1082 | 0.1082 | 0.0050 | 0.8669  | 1.0000  | 1.0000  |
| $N = 256$                                       | 0.1041                                  | 0.0034                                          | 0.1041 | 0.1041 | 0.0033 | 0.3270  | 1.0000  | 1.0000  |
| $p = 1024, q = 4, V_{\text{rel}}(\Sigma) = 0.2$ |                                         |                                                 |        |        |        |         |         |         |
| $N = 4$                                         | 0.5174                                  | 0.1234                                          | 0.5036 | 0.5197 | 0.0916 | 1.7658  | 1.0000  | 1.0000  |
| $N = 8$                                         | 0.3459                                  | 0.0596                                          | 0.3379 | 0.3465 | 0.0516 | 0.8457  | 1.0000  | 1.0000  |
| $N = 16$                                        | 0.2702                                  | 0.0291                                          | 0.2672 | 0.2711 | 0.0272 | 2.2078  | 1.0000  | 1.0000  |
| $N = 32$                                        | 0.2345                                  | 0.0147                                          | 0.2329 | 0.2345 | 0.0142 | -0.0558 | 1.0000  | 1.0000  |
| $N = 64$                                        | 0.2171                                  | 0.0077                                          | 0.2164 | 0.2171 | 0.0076 | -0.3159 | 1.0000  | 1.0000  |
| $N = 128$                                       | 0.2085                                  | 0.0043                                          | 0.2082 | 0.2085 | 0.0042 | -0.4645 | 1.0000  | 1.0000  |
| $N = 256$                                       | 0.2042                                  | 0.0025                                          | 0.2041 | 0.2042 | 0.0025 | -0.3507 | 1.0000  | 1.0000  |

(continued)

**Table S2.** (continued)

|                                                                                             | $\approx E[V_{\text{rel}}(\mathbf{S})]$ | $\approx \text{SD}[V_{\text{rel}}(\mathbf{S})]$ | Median | Mean   | ESD    | $T$     | Pow. 5% | Pow. 1% |
|---------------------------------------------------------------------------------------------|-----------------------------------------|-------------------------------------------------|--------|--------|--------|---------|---------|---------|
| $p = 2$ , linearly decreasing $\lambda$ ( $V_{\text{rel}}(\boldsymbol{\Sigma}) = 0.1111$ )  |                                         |                                                 |        |        |        |         |         |         |
| $N = 4$                                                                                     | 0.4433                                  | 0.4624                                          | 0.5454 | 0.5308 | 0.2864 | 21.5974 | 0.0550  | 0.0116  |
| $N = 8$                                                                                     | 0.2822                                  | 0.2964                                          | 0.2773 | 0.3101 | 0.2141 | 9.2064  | 0.0964  | 0.0266  |
| $N = 16$                                                                                    | 0.1998                                  | 0.1848                                          | 0.1783 | 0.2080 | 0.1505 | 3.8473  | 0.1900  | 0.0548  |
| $N = 32$                                                                                    | 0.1564                                  | 0.1190                                          | 0.1422 | 0.1606 | 0.1065 | 2.8070  | 0.3726  | 0.1508  |
| $N = 64$                                                                                    | 0.1340                                  | 0.0794                                          | 0.1260 | 0.1346 | 0.0747 | 0.6060  | 0.6880  | 0.4968  |
| $N = 128$                                                                                   | 0.1226                                  | 0.0543                                          | 0.1191 | 0.1235 | 0.0534 | 1.1103  | 0.9492  | 0.8676  |
| $N = 256$                                                                                   | 0.1169                                  | 0.0377                                          | 0.1145 | 0.1167 | 0.0369 | -0.3463 | 0.9990  | 0.9940  |
| $p = 4$ , linearly decreasing $\lambda$ ( $V_{\text{rel}}(\boldsymbol{\Sigma}) = 0.0667$ )  |                                         |                                                 |        |        |        |         |         |         |
| $N = 4$                                                                                     | 0.4440                                  | 0.2334                                          | 0.4352 | 0.4602 | 0.1600 | 7.1593  | 0.0810  | 0.0180  |
| $N = 8$                                                                                     | 0.2464                                  | 0.1278                                          | 0.2350 | 0.2515 | 0.1022 | 3.5335  | 0.1358  | 0.0408  |
| $N = 16$                                                                                    | 0.1549                                  | 0.0713                                          | 0.1466 | 0.1551 | 0.0626 | 0.3162  | 0.3068  | 0.1148  |
| $N = 32$                                                                                    | 0.1104                                  | 0.0423                                          | 0.1044 | 0.1098 | 0.0396 | -1.0912 | 0.6722  | 0.3788  |
| $N = 64$                                                                                    | 0.0884                                  | 0.0267                                          | 0.0863 | 0.0890 | 0.0258 | 1.4457  | 0.9832  | 0.9172  |
| $N = 128$                                                                                   | 0.0775                                  | 0.0176                                          | 0.0760 | 0.0775 | 0.0174 | -0.2476 | 1.0000  | 1.0000  |
| $N = 256$                                                                                   | 0.0721                                  | 0.0120                                          | 0.0718 | 0.0724 | 0.0117 | 1.6817  | 1.0000  | 1.0000  |
| $p = 8$ , linearly decreasing $\lambda$ ( $V_{\text{rel}}(\boldsymbol{\Sigma}) = 0.0370$ )  |                                         |                                                 |        |        |        |         |         |         |
| $N = 4$                                                                                     | 0.4089                                  | 0.1184                                          | 0.3958 | 0.4129 | 0.0932 | 2.9996  | 0.1068  | 0.0292  |
| $N = 8$                                                                                     | 0.2058                                  | 0.0584                                          | 0.1989 | 0.2060 | 0.0510 | 0.2640  | 0.1982  | 0.0808  |
| $N = 16$                                                                                    | 0.1178                                  | 0.0302                                          | 0.1139 | 0.1176 | 0.0282 | -0.4178 | 0.4668  | 0.2476  |
| $N = 32$                                                                                    | 0.0766                                  | 0.0168                                          | 0.0754 | 0.0771 | 0.0165 | 2.2504  | 0.9060  | 0.7168  |
| $N = 64$                                                                                    | 0.0566                                  | 0.0100                                          | 0.0559 | 0.0567 | 0.0098 | 0.6109  | 1.0000  | 1.0000  |
| $N = 128$                                                                                   | 0.0468                                  | 0.0063                                          | 0.0463 | 0.0467 | 0.0062 | -1.1788 | 1.0000  | 1.0000  |
| $N = 256$                                                                                   | 0.0419                                  | 0.0042                                          | 0.0416 | 0.0420 | 0.0042 | 1.1985  | 1.0000  | 1.0000  |
| $p = 16$ , linearly decreasing $\lambda$ ( $V_{\text{rel}}(\boldsymbol{\Sigma}) = 0.0196$ ) |                                         |                                                 |        |        |        |         |         |         |
| $N = 4$                                                                                     | 0.3773                                  | 0.0593                                          | 0.3693 | 0.3780 | 0.0526 | 1.0046  | 0.1246  | 0.0366  |
| $N = 8$                                                                                     | 0.1776                                  | 0.0274                                          | 0.1747 | 0.1776 | 0.0251 | 0.0584  | 0.2290  | 0.0860  |
| $N = 16$                                                                                    | 0.0942                                  | 0.0134                                          | 0.0932 | 0.0945 | 0.0132 | 1.1528  | 0.5654  | 0.3212  |
| $N = 32$                                                                                    | 0.0559                                  | 0.0071                                          | 0.0555 | 0.0560 | 0.0071 | 0.9064  | 0.9740  | 0.8924  |
| $N = 64$                                                                                    | 0.0375                                  | 0.0040                                          | 0.0372 | 0.0375 | 0.0040 | 0.0096  | 1.0000  | 1.0000  |
| $N = 128$                                                                                   | 0.0285                                  | 0.0024                                          | 0.0284 | 0.0285 | 0.0024 | -0.6234 | 1.0000  | 1.0000  |
| $N = 256$                                                                                   | 0.0240                                  | 0.0015                                          | 0.0240 | 0.0240 | 0.0015 | 0.0265  | 1.0000  | 1.0000  |
| $p = 32$ , linearly decreasing $\lambda$ ( $V_{\text{rel}}(\boldsymbol{\Sigma}) = 0.0101$ ) |                                         |                                                 |        |        |        |         |         |         |
| $N = 4$                                                                                     | 0.3570                                  | 0.0295                                          | 0.3524 | 0.3575 | 0.0271 | 1.2012  | 0.1346  | 0.0410  |
| $N = 8$                                                                                     | 0.1611                                  | 0.0131                                          | 0.1595 | 0.1608 | 0.0125 | -1.6115 | 0.2570  | 0.0966  |
| $N = 16$                                                                                    | 0.0810                                  | 0.0063                                          | 0.0804 | 0.0809 | 0.0061 | -1.1890 | 0.6594  | 0.3810  |
| $N = 32$                                                                                    | 0.0445                                  | 0.0032                                          | 0.0443 | 0.0445 | 0.0031 | -0.6711 | 0.9894  | 0.9498  |
| $N = 64$                                                                                    | 0.0271                                  | 0.0017                                          | 0.0270 | 0.0271 | 0.0017 | 0.5277  | 1.0000  | 1.0000  |
| $N = 128$                                                                                   | 0.0185                                  | 0.0010                                          | 0.0185 | 0.0185 | 0.0010 | 0.8847  | 1.0000  | 1.0000  |
| $N = 256$                                                                                   | 0.0143                                  | 0.0006                                          | 0.0143 | 0.0143 | 0.0006 | -0.1711 | 1.0000  | 1.0000  |

(continued)

**Table S2.** (continued)

|                                                                                               | $\approx E[V_{\text{rel}}(\mathbf{S})]$ | $\approx \text{SD}[V_{\text{rel}}(\mathbf{S})]$ | Median | Mean   | ESD     | $T$     | Pow. 5% | Pow. 1% |
|-----------------------------------------------------------------------------------------------|-----------------------------------------|-------------------------------------------------|--------|--------|---------|---------|---------|---------|
| $p = 64$ , linearly decreasing $\lambda$ ( $V_{\text{rel}}(\boldsymbol{\Sigma}) = 0.0051$ )   |                                         |                                                 |        |        |         |         |         |         |
| $N = 4$                                                                                       | 0.3456                                  | 0.01471                                         | 0.3427 | 0.3456 | 0.01414 | 0.1623  | 0.1296  | 0.0366  |
| $N = 8$                                                                                       | 0.1522                                  | 0.00642                                         | 0.1514 | 0.1522 | 0.00633 | 0.0749  | 0.2962  | 0.1338  |
| $N = 16$                                                                                      | 0.0740                                  | 0.00300                                         | 0.0737 | 0.0739 | 0.00296 | -1.7247 | 0.6844  | 0.4484  |
| $N = 32$                                                                                      | 0.0385                                  | 0.00148                                         | 0.0384 | 0.0385 | 0.00148 | 0.6798  | 0.9936  | 0.9696  |
| $N = 64$                                                                                      | 0.0216                                  | 0.00076                                         | 0.0215 | 0.0216 | 0.00076 | 0.7268  | 1.0000  | 1.0000  |
| $N = 128$                                                                                     | 0.0133                                  | 0.00041                                         | 0.0133 | 0.0133 | 0.00042 | -0.5858 | 1.0000  | 1.0000  |
| $N = 256$                                                                                     | 0.0092                                  | 0.00024                                         | 0.0092 | 0.0092 | 0.00023 | -2.1676 | 1.0000  | 1.0000  |
| $p = 128$ , linearly decreasing $\lambda$ ( $V_{\text{rel}}(\boldsymbol{\Sigma}) = 0.0026$ )  |                                         |                                                 |        |        |         |         |         |         |
| $N = 4$                                                                                       | 0.3396                                  | 0.00734                                         | 0.3381 | 0.3395 | 0.00715 | -1.1276 | 0.1388  | 0.0446  |
| $N = 8$                                                                                       | 0.1476                                  | 0.00317                                         | 0.1473 | 0.1476 | 0.00319 | 1.3934  | 0.3240  | 0.1514  |
| $N = 16$                                                                                      | 0.0704                                  | 0.00146                                         | 0.0702 | 0.0703 | 0.00146 | -1.6467 | 0.7072  | 0.4642  |
| $N = 32$                                                                                      | 0.0354                                  | 0.00071                                         | 0.0354 | 0.0354 | 0.00071 | -0.1477 | 0.9956  | 0.9772  |
| $N = 64$                                                                                      | 0.0187                                  | 0.00036                                         | 0.0187 | 0.0187 | 0.00036 | -0.4842 | 1.0000  | 1.0000  |
| $N = 128$                                                                                     | 0.0106                                  | 0.00019                                         | 0.0106 | 0.0106 | 0.00019 | 0.7478  | 1.0000  | 1.0000  |
| $N = 256$                                                                                     | 0.0066                                  | 0.00010                                         | 0.0066 | 0.0066 | 0.00010 | 1.7065  | 1.0000  | 1.0000  |
| $p = 256$ , linearly decreasing $\lambda$ ( $V_{\text{rel}}(\boldsymbol{\Sigma}) = 0.0013$ )  |                                         |                                                 |        |        |         |         |         |         |
| $N = 4$                                                                                       | 0.3365                                  | 0.00366                                         | 0.3357 | 0.3365 | 0.00365 | 0.5477  | 0.1388  | 0.0488  |
| $N = 8$                                                                                       | 0.1452                                  | 0.00157                                         | 0.1451 | 0.1453 | 0.00155 | 0.9592  | 0.3200  | 0.1046  |
| $N = 16$                                                                                      | 0.0685                                  | 0.00072                                         | 0.0685 | 0.0685 | 0.00071 | 2.6723  | 0.7506  | 0.4980  |
| $N = 32$                                                                                      | 0.0338                                  | 0.00035                                         | 0.0338 | 0.0338 | 0.00035 | -0.3700 | 0.9968  | 0.9796  |
| $N = 64$                                                                                      | 0.0173                                  | 0.00017                                         | 0.0173 | 0.0173 | 0.00017 | 0.7181  | 1.0000  | 1.0000  |
| $N = 128$                                                                                     | 0.0092                                  | 0.00009                                         | 0.0092 | 0.0092 | 0.00009 | -0.0474 | 1.0000  | 1.0000  |
| $N = 256$                                                                                     | 0.0053                                  | 0.00005                                         | 0.0053 | 0.0053 | 0.00005 | -0.2356 | 1.0000  | 1.0000  |
| $p = 1024$ , linearly decreasing $\lambda$ ( $V_{\text{rel}}(\boldsymbol{\Sigma}) = 0.0003$ ) |                                         |                                                 |        |        |         |         |         |         |
| $N = 4$                                                                                       | 0.3341                                  | 0.00092                                         | 0.3340 | 0.3341 | 0.00093 | 0.5238  | 0.1328  | 0.0428  |
| $N = 8$                                                                                       | 0.1435                                  | 0.00039                                         | 0.1434 | 0.1435 | 0.00039 | -0.0304 | 0.3188  | 0.1342  |
| $N = 16$                                                                                      | 0.0671                                  | 0.00018                                         | 0.0671 | 0.0671 | 0.00018 | 0.0071  | 0.7104  | 0.5334  |
| $N = 32$                                                                                      | 0.0327                                  | 0.00009                                         | 0.0327 | 0.0327 | 0.00009 | 1.9692  | 0.9984  | 0.9884  |
| $N = 64$                                                                                      | 0.0162                                  | 0.00004                                         | 0.0162 | 0.0162 | 0.00004 | -1.4251 | 1.0000  | 1.0000  |
| $N = 128$                                                                                     | 0.0082                                  | 0.00002                                         | 0.0082 | 0.0082 | 0.00002 | -0.7182 | 1.0000  | 1.0000  |
| $N = 256$                                                                                     | 0.0043                                  | 0.00001                                         | 0.0043 | 0.0043 | 0.00001 | 0.4714  | 1.0000  | 1.0000  |

(continued)

**Table S2.** (continued)

|                                                                                     | $\approx E[V_{\text{rel}}(\mathbf{S})]$ | $\approx \text{SD}[V_{\text{rel}}(\mathbf{S})]$ | Median | Mean   | ESD    | $T$     | Pow. 5% | Pow. 1% |
|-------------------------------------------------------------------------------------|-----------------------------------------|-------------------------------------------------|--------|--------|--------|---------|---------|---------|
| $p = 2$ , quadratically decreasing $\lambda$ ( $V_{\text{rel}}(\Sigma) = 0.3600$ )  |                                         |                                                 |        |        |        |         |         |         |
| $N = 4$                                                                             | 0.4588                                  | 0.3879                                          | 0.6400 | 0.6006 | 0.2781 | 36.0479 | 0.0902  | 0.0184  |
| $N = 8$                                                                             | 0.4107                                  | 0.2919                                          | 0.4696 | 0.4570 | 0.2354 | 13.8894 | 0.2646  | 0.0982  |
| $N = 16$                                                                            | 0.3899                                  | 0.2029                                          | 0.4064 | 0.4019 | 0.1785 | 4.7316  | 0.6200  | 0.3362  |
| $N = 32$                                                                            | 0.3766                                  | 0.1403                                          | 0.3794 | 0.3790 | 0.1297 | 1.3433  | 0.9294  | 0.7882  |
| $N = 64$                                                                            | 0.3687                                  | 0.0977                                          | 0.3710 | 0.3700 | 0.0946 | 0.9496  | 0.9992  | 0.9960  |
| $N = 128$                                                                           | 0.3645                                  | 0.0685                                          | 0.3644 | 0.3653 | 0.0671 | 0.8978  | 1.0000  | 1.0000  |
| $N = 256$                                                                           | 0.3623                                  | 0.0482                                          | 0.3629 | 0.3620 | 0.0480 | -0.4354 | 1.0000  | 1.0000  |
| $p = 4$ , quadratically decreasing $\lambda$ ( $V_{\text{rel}}(\Sigma) = 0.1911$ )  |                                         |                                                 |        |        |        |         |         |         |
| $N = 4$                                                                             | 0.4786                                  | 0.2770                                          | 0.5126 | 0.5300 | 0.1744 | 20.8377 | 0.1746  | 0.0572  |
| $N = 8$                                                                             | 0.3332                                  | 0.1705                                          | 0.3275 | 0.3461 | 0.1250 | 7.3018  | 0.3820  | 0.1802  |
| $N = 16$                                                                            | 0.2628                                  | 0.1044                                          | 0.2523 | 0.2658 | 0.0869 | 2.4188  | 0.8598  | 0.6038  |
| $N = 32$                                                                            | 0.2272                                  | 0.0667                                          | 0.2212 | 0.2286 | 0.0606 | 1.6646  | 0.9998  | 0.9914  |
| $N = 64$                                                                            | 0.2092                                  | 0.0444                                          | 0.2043 | 0.2090 | 0.0418 | -0.3674 | 1.0000  | 1.0000  |
| $N = 128$                                                                           | 0.2002                                  | 0.0303                                          | 0.1977 | 0.2004 | 0.0293 | 0.5275  | 1.0000  | 1.0000  |
| $N = 256$                                                                           | 0.1957                                  | 0.0211                                          | 0.1948 | 0.1956 | 0.0205 | -0.2530 | 1.0000  | 1.0000  |
| $p = 8$ , quadratically decreasing $\lambda$ ( $V_{\text{rel}}(\Sigma) = 0.0980$ )  |                                         |                                                 |        |        |        |         |         |         |
| $N = 4$                                                                             | 0.4455                                  | 0.1557                                          | 0.4359 | 0.4568 | 0.1104 | 7.2433  | 0.2120  | 0.0808  |
| $N = 8$                                                                             | 0.2589                                  | 0.0830                                          | 0.2499 | 0.2608 | 0.0683 | 1.8730  | 0.5416  | 0.3214  |
| $N = 16$                                                                            | 0.1759                                  | 0.0461                                          | 0.1704 | 0.1762 | 0.0410 | 0.6287  | 0.9666  | 0.8714  |
| $N = 32$                                                                            | 0.1363                                  | 0.0274                                          | 0.1333 | 0.1365 | 0.0257 | 0.3997  | 1.0000  | 1.0000  |
| $N = 64$                                                                            | 0.1170                                  | 0.0174                                          | 0.1152 | 0.1169 | 0.0170 | -0.7032 | 1.0000  | 1.0000  |
| $N = 128$                                                                           | 0.1075                                  | 0.0116                                          | 0.1067 | 0.1075 | 0.0114 | 0.0192  | 1.0000  | 1.0000  |
| $N = 256$                                                                           | 0.1028                                  | 0.0079                                          | 0.1023 | 0.1028 | 0.0078 | 0.2060  | 1.0000  | 1.0000  |
| $p = 16$ , quadratically decreasing $\lambda$ ( $V_{\text{rel}}(\Sigma) = 0.0496$ ) |                                         |                                                 |        |        |        |         |         |         |
| $N = 4$                                                                             | 0.4022                                  | 0.0801                                          | 0.3929 | 0.4044 | 0.0655 | 2.4555  | 0.2552  | 0.1008  |
| $N = 8$                                                                             | 0.2069                                  | 0.0388                                          | 0.2025 | 0.2075 | 0.0346 | 1.1343  | 0.6284  | 0.3734  |
| $N = 16$                                                                            | 0.1243                                  | 0.0201                                          | 0.1219 | 0.1242 | 0.0189 | -0.2887 | 0.9884  | 0.9362  |
| $N = 32$                                                                            | 0.0860                                  | 0.0112                                          | 0.0851 | 0.0861 | 0.0108 | 0.3780  | 1.0000  | 1.0000  |
| $N = 64$                                                                            | 0.0676                                  | 0.0068                                          | 0.0670 | 0.0676 | 0.0066 | 0.5759  | 1.0000  | 1.0000  |
| $N = 128$                                                                           | 0.0585                                  | 0.0043                                          | 0.0582 | 0.0584 | 0.0042 | -1.0260 | 1.0000  | 1.0000  |
| $N = 256$                                                                           | 0.0540                                  | 0.0029                                          | 0.0540 | 0.0541 | 0.0029 | 2.0991  | 1.0000  | 1.0000  |
| $p = 32$ , quadratically decreasing $\lambda$ ( $V_{\text{rel}}(\Sigma) = 0.0249$ ) |                                         |                                                 |        |        |        |         |         |         |
| $N = 4$                                                                             | 0.3713                                  | 0.0401                                          | 0.3642 | 0.3715 | 0.0363 | 0.3888  | 0.2768  | 0.1296  |
| $N = 8$                                                                             | 0.1765                                  | 0.0183                                          | 0.1741 | 0.1765 | 0.0177 | 0.2092  | 0.6570  | 0.4126  |
| $N = 16$                                                                            | 0.0962                                  | 0.0090                                          | 0.0953 | 0.0960 | 0.0087 | -1.6594 | 0.9944  | 0.9622  |
| $N = 32$                                                                            | 0.0595                                  | 0.0048                                          | 0.0593 | 0.0596 | 0.0047 | 0.8578  | 1.0000  | 1.0000  |
| $N = 64$                                                                            | 0.0420                                  | 0.0027                                          | 0.0418 | 0.0420 | 0.0027 | -0.3644 | 1.0000  | 1.0000  |
| $N = 128$                                                                           | 0.0334                                  | 0.0017                                          | 0.0333 | 0.0334 | 0.0017 | 0.6213  | 1.0000  | 1.0000  |
| $N = 256$                                                                           | 0.0291                                  | 0.0011                                          | 0.0291 | 0.0291 | 0.0011 | 0.8151  | 1.0000  | 1.0000  |

(continued)

**Table S2.** (continued)

|                                                                                                    | $\approx E[V_{\text{rel}}(\mathbf{S})]$ | $\approx \text{SD}[V_{\text{rel}}(\mathbf{S})]$ | Median | Mean   | ESD     | $T$     | Pow. 5% | Pow. 1% |
|----------------------------------------------------------------------------------------------------|-----------------------------------------|-------------------------------------------------|--------|--------|---------|---------|---------|---------|
| $p = 64$ , quadratically decreasing $\lambda$ ( $V_{\text{rel}}(\boldsymbol{\Sigma}) = 0.0125$ )   |                                         |                                                 |        |        |         |         |         |         |
| $N = 4$                                                                                            | 0.3532                                  | 0.01994                                         | 0.3501 | 0.3537 | 0.01885 | 1.7900  | 0.2828  | 0.1174  |
| $N = 8$                                                                                            | 0.1601                                  | 0.00883                                         | 0.1590 | 0.1600 | 0.00873 | -0.6981 | 0.6952  | 0.4790  |
| $N = 16$                                                                                           | 0.0816                                  | 0.00420                                         | 0.0814 | 0.0818 | 0.00424 | 2.1275  | 0.9958  | 0.9770  |
| $N = 32$                                                                                           | 0.0460                                  | 0.00213                                         | 0.0459 | 0.0460 | 0.00209 | 0.5724  | 1.0000  | 1.0000  |
| $N = 64$                                                                                           | 0.0290                                  | 0.00115                                         | 0.0290 | 0.0290 | 0.00114 | 2.1029  | 1.0000  | 1.0000  |
| $N = 128$                                                                                          | 0.0207                                  | 0.00066                                         | 0.0206 | 0.0207 | 0.00066 | -1.9228 | 1.0000  | 1.0000  |
| $N = 256$                                                                                          | 0.0166                                  | 0.00041                                         | 0.0166 | 0.0166 | 0.00041 | 0.8326  | 1.0000  | 1.0000  |
| $p = 128$ , quadratically decreasing $\lambda$ ( $V_{\text{rel}}(\boldsymbol{\Sigma}) = 0.0062$ )  |                                         |                                                 |        |        |         |         |         |         |
| $N = 4$                                                                                            | 0.3435                                  | 0.00993                                         | 0.3416 | 0.3436 | 0.00964 | 0.2942  | 0.2888  | 0.1320  |
| $N = 8$                                                                                            | 0.1516                                  | 0.00432                                         | 0.1511 | 0.1515 | 0.00424 | -0.6585 | 0.7264  | 0.5188  |
| $N = 16$                                                                                           | 0.0742                                  | 0.00202                                         | 0.0741 | 0.0742 | 0.00200 | -0.8615 | 0.9962  | 0.9824  |
| $N = 32$                                                                                           | 0.0392                                  | 0.00100                                         | 0.0391 | 0.0391 | 0.00100 | -1.0978 | 1.0000  | 1.0000  |
| $N = 64$                                                                                           | 0.0224                                  | 0.00052                                         | 0.0224 | 0.0224 | 0.00051 | -1.0415 | 1.0000  | 1.0000  |
| $N = 128$                                                                                          | 0.0143                                  | 0.00028                                         | 0.0143 | 0.0143 | 0.00028 | -0.0377 | 1.0000  | 1.0000  |
| $N = 256$                                                                                          | 0.0102                                  | 0.00016                                         | 0.0102 | 0.0102 | 0.00016 | -0.4172 | 1.0000  | 1.0000  |
| $p = 256$ , quadratically decreasing $\lambda$ ( $V_{\text{rel}}(\boldsymbol{\Sigma}) = 0.0031$ )  |                                         |                                                 |        |        |         |         |         |         |
| $N = 4$                                                                                            | 0.3385                                  | 0.00495                                         | 0.3375 | 0.3385 | 0.00483 | -0.3735 | 0.2886  | 0.1312  |
| $N = 8$                                                                                            | 0.1472                                  | 0.00214                                         | 0.1470 | 0.1472 | 0.00212 | 0.1107  | 0.7280  | 0.4636  |
| $N = 16$                                                                                           | 0.0704                                  | 0.00099                                         | 0.0704 | 0.0704 | 0.00098 | -1.6367 | 0.9976  | 0.9846  |
| $N = 32$                                                                                           | 0.0357                                  | 0.00048                                         | 0.0357 | 0.0357 | 0.00048 | 0.6626  | 1.0000  | 1.0000  |
| $N = 64$                                                                                           | 0.0192                                  | 0.00024                                         | 0.0192 | 0.0192 | 0.00024 | -1.5591 | 1.0000  | 1.0000  |
| $N = 128$                                                                                          | 0.0111                                  | 0.00013                                         | 0.0111 | 0.0111 | 0.00013 | -2.4955 | 1.0000  | 1.0000  |
| $N = 256$                                                                                          | 0.0071                                  | 0.00007                                         | 0.0071 | 0.0071 | 0.00007 | 0.0791  | 1.0000  | 1.0000  |
| $p = 1024$ , quadratically decreasing $\lambda$ ( $V_{\text{rel}}(\boldsymbol{\Sigma}) = 0.0008$ ) |                                         |                                                 |        |        |         |         |         |         |
| $N = 4$                                                                                            | 0.3346                                  | 0.00124                                         | 0.3344 | 0.3346 | 0.00121 | 0.6326  | 0.2838  | 0.1306  |
| $N = 8$                                                                                            | 0.1440                                  | 0.00053                                         | 0.1439 | 0.1440 | 0.00054 | 1.2686  | 0.7300  | 0.5134  |
| $N = 16$                                                                                           | 0.0676                                  | 0.00024                                         | 0.0676 | 0.0676 | 0.00024 | -1.5337 | 0.9968  | 0.9880  |
| $N = 32$                                                                                           | 0.0331                                  | 0.00012                                         | 0.0331 | 0.0331 | 0.00011 | 0.5647  | 1.0000  | 1.0000  |
| $N = 64$                                                                                           | 0.0167                                  | 0.00006                                         | 0.0167 | 0.0167 | 0.00006 | -0.7195 | 1.0000  | 1.0000  |
| $N = 128$                                                                                          | 0.0087                                  | 0.00003                                         | 0.0087 | 0.0087 | 0.00003 | -1.0076 | 1.0000  | 1.0000  |
| $N = 256$                                                                                          | 0.0047                                  | 0.00001                                         | 0.0047 | 0.0047 | 0.00002 | -0.1773 | 1.0000  | 1.0000  |

**Table S3.** Summary statistics of simulation results for  $V_{\text{rel}}(\mathbf{R})$ . Theoretical expectation ( $E[V_{\text{rel}}(\mathbf{R})]$ ) and standard deviation ( $\text{SD}[V_{\text{rel}}(\mathbf{R})]$ ); asymptotic results are shown for the latter in non-null conditions with  $p > 2$ ), and empirical median, mean, standard deviation (ESD), bias in standard error unit ( $T$ ), and critical points or power (for null and non-null conditions, respectively) at  $\alpha = 0.05$  and  $0.01$  (CP/Pow. 5% and 1%) from 5000 simulation runs are shown. See Table S1 for further information.

|                                          | $E[V_{\text{rel}}(\mathbf{R})]$ | $\text{SD}[V_{\text{rel}}(\mathbf{R})]$ | Median | Mean   | ESD    | $T$     | CP 5%  | CP 1%  |
|------------------------------------------|---------------------------------|-----------------------------------------|--------|--------|--------|---------|--------|--------|
| $p = 2, V_{\text{rel}}(\mathbf{P}) = 0$  |                                 |                                         |        |        |        |         |        |        |
| $N = 4$                                  | 0.3333                          | 0.2981                                  | 0.2517 | 0.3325 | 0.2989 | -0.1990 | 0.9021 | 0.9807 |
| $N = 8$                                  | 0.1429                          | 0.1650                                  | 0.0792 | 0.1429 | 0.1635 | 0.0363  | 0.4979 | 0.6857 |
| $N = 16$                                 | 0.0667                          | 0.0856                                  | 0.0336 | 0.0679 | 0.0862 | 1.0235  | 0.2456 | 0.3876 |
| $N = 32$                                 | 0.0323                          | 0.0435                                  | 0.0163 | 0.0326 | 0.0427 | 0.6113  | 0.1194 | 0.1934 |
| $N = 64$                                 | 0.0159                          | 0.0219                                  | 0.0075 | 0.0156 | 0.0205 | -1.0380 | 0.0583 | 0.0938 |
| $N = 128$                                | 0.0079                          | 0.0110                                  | 0.0035 | 0.0076 | 0.0104 | -1.5798 | 0.0295 | 0.0467 |
| $N = 256$                                | 0.0039                          | 0.0055                                  | 0.0018 | 0.0039 | 0.0054 | -0.3981 | 0.0148 | 0.0252 |
| $p = 4, V_{\text{rel}}(\mathbf{P}) = 0$  |                                 |                                         |        |        |        |         |        |        |
| $N = 4$                                  | 0.3333                          | 0.1217                                  | 0.3152 | 0.3327 | 0.1214 | -0.3906 | 0.5646 | 0.7079 |
| $N = 8$                                  | 0.1429                          | 0.0673                                  | 0.1332 | 0.1432 | 0.0673 | 0.3148  | 0.2728 | 0.3435 |
| $N = 16$                                 | 0.0667                          | 0.0349                                  | 0.0608 | 0.0661 | 0.0344 | -1.0696 | 0.1289 | 0.1728 |
| $N = 32$                                 | 0.0323                          | 0.0178                                  | 0.0292 | 0.0321 | 0.0175 | -0.6906 | 0.0642 | 0.0866 |
| $N = 64$                                 | 0.0159                          | 0.0090                                  | 0.0142 | 0.0157 | 0.0087 | -1.0749 | 0.0323 | 0.0426 |
| $N = 128$                                | 0.0079                          | 0.0045                                  | 0.0070 | 0.0079 | 0.0045 | 0.0033  | 0.0165 | 0.0215 |
| $N = 256$                                | 0.0039                          | 0.0023                                  | 0.0035 | 0.0039 | 0.0022 | -0.9161 | 0.0081 | 0.0107 |
| $p = 8, V_{\text{rel}}(\mathbf{P}) = 0$  |                                 |                                         |        |        |        |         |        |        |
| $N = 4$                                  | 0.3333                          | 0.0563                                  | 0.3228 | 0.3336 | 0.0569 | 0.3780  | 0.4418 | 0.5149 |
| $N = 8$                                  | 0.1429                          | 0.0312                                  | 0.1402 | 0.1428 | 0.0312 | -0.1003 | 0.1975 | 0.2302 |
| $N = 16$                                 | 0.0667                          | 0.0162                                  | 0.0654 | 0.0668 | 0.0159 | 0.4573  | 0.0948 | 0.1102 |
| $N = 32$                                 | 0.0323                          | 0.0082                                  | 0.0315 | 0.0322 | 0.0082 | -0.1190 | 0.0465 | 0.0544 |
| $N = 64$                                 | 0.0159                          | 0.0041                                  | 0.0156 | 0.0159 | 0.0041 | 0.2305  | 0.0232 | 0.0270 |
| $N = 128$                                | 0.0079                          | 0.0021                                  | 0.0077 | 0.0079 | 0.0021 | 0.0628  | 0.0117 | 0.0136 |
| $N = 256$                                | 0.0039                          | 0.0010                                  | 0.0039 | 0.0039 | 0.0010 | 1.2483  | 0.0058 | 0.0067 |
| $p = 16, V_{\text{rel}}(\mathbf{P}) = 0$ |                                 |                                         |        |        |        |         |        |        |
| $N = 4$                                  | 0.3333                          | 0.0272                                  | 0.3281 | 0.3332 | 0.0265 | -0.4751 | 0.3850 | 0.4135 |
| $N = 8$                                  | 0.1429                          | 0.0151                                  | 0.1411 | 0.1428 | 0.0151 | -0.0917 | 0.1698 | 0.1840 |
| $N = 16$                                 | 0.0667                          | 0.0078                                  | 0.0663 | 0.0669 | 0.0080 | 1.7743  | 0.0810 | 0.0879 |
| $N = 32$                                 | 0.0323                          | 0.0040                                  | 0.0319 | 0.0322 | 0.0039 | -1.7517 | 0.0389 | 0.0428 |
| $N = 64$                                 | 0.0159                          | 0.0020                                  | 0.0158 | 0.0159 | 0.0020 | 0.7127  | 0.0192 | 0.0209 |
| $N = 128$                                | 0.0079                          | 0.0010                                  | 0.0078 | 0.0079 | 0.0010 | -0.7405 | 0.0096 | 0.0104 |
| $N = 256$                                | 0.0039                          | 0.0005                                  | 0.0039 | 0.0039 | 0.0005 | 1.3884  | 0.0048 | 0.0052 |
| $p = 32, V_{\text{rel}}(\mathbf{P}) = 0$ |                                 |                                         |        |        |        |         |        |        |
| $N = 4$                                  | 0.3333                          | 0.0134                                  | 0.3306 | 0.3332 | 0.0133 | -0.7714 | 0.3586 | 0.3770 |
| $N = 8$                                  | 0.1429                          | 0.0074                                  | 0.1418 | 0.1426 | 0.0074 | -2.0764 | 0.1562 | 0.1627 |
| $N = 16$                                 | 0.0667                          | 0.0038                                  | 0.0665 | 0.0666 | 0.0038 | -1.7329 | 0.0732 | 0.0766 |
| $N = 32$                                 | 0.0323                          | 0.0020                                  | 0.0322 | 0.0322 | 0.0019 | -1.3105 | 0.0355 | 0.0370 |
| $N = 64$                                 | 0.0159                          | 0.0010                                  | 0.0158 | 0.0159 | 0.0010 | -0.5099 | 0.0175 | 0.0183 |
| $N = 128$                                | 0.0079                          | 0.0005                                  | 0.0079 | 0.0079 | 0.0005 | -0.0426 | 0.0087 | 0.0091 |
| $N = 256$                                | 0.0039                          | 0.0002                                  | 0.0039 | 0.0039 | 0.0002 | -0.0743 | 0.0043 | 0.0045 |

(continued)

**Table S3.** (continued)

|                                            | $E[V_{\text{rel}}(\mathbf{R})]$ | $SD[V_{\text{rel}}(\mathbf{R})]$ | Median | Mean   | ESD     | $T$     | CP 5%  | CP 1%  |
|--------------------------------------------|---------------------------------|----------------------------------|--------|--------|---------|---------|--------|--------|
| $p = 64, V_{\text{rel}}(\mathbf{P}) = 0$   |                                 |                                  |        |        |         |         |        |        |
| $N = 4$                                    | 0.3333                          | 0.00664                          | 0.3320 | 0.3333 | 0.00677 | -0.0624 | 0.3463 | 0.3543 |
| $N = 8$                                    | 0.1429                          | 0.00367                          | 0.1425 | 0.1428 | 0.00363 | -0.4617 | 0.1492 | 0.1530 |
| $N = 16$                                   | 0.0667                          | 0.00191                          | 0.0666 | 0.0667 | 0.00188 | 0.4407  | 0.0699 | 0.0716 |
| $N = 32$                                   | 0.0323                          | 0.00097                          | 0.0322 | 0.0323 | 0.00099 | -0.0725 | 0.0339 | 0.0347 |
| $N = 64$                                   | 0.0159                          | 0.00049                          | 0.0159 | 0.0159 | 0.00048 | -0.6525 | 0.0167 | 0.0170 |
| $N = 128$                                  | 0.0079                          | 0.00025                          | 0.0079 | 0.0079 | 0.00025 | 0.8165  | 0.0083 | 0.0085 |
| $N = 256$                                  | 0.0039                          | 0.00012                          | 0.0039 | 0.0039 | 0.00012 | 1.7441  | 0.0041 | 0.0042 |
| $p = 128, V_{\text{rel}}(\mathbf{P}) = 0$  |                                 |                                  |        |        |         |         |        |        |
| $N = 4$                                    | 0.3333                          | 0.00331                          | 0.3327 | 0.3333 | 0.00327 | 0.1648  | 0.3397 | 0.3433 |
| $N = 8$                                    | 0.1429                          | 0.00183                          | 0.1427 | 0.1428 | 0.00180 | -1.3211 | 0.1460 | 0.1478 |
| $N = 16$                                   | 0.0667                          | 0.00095                          | 0.0666 | 0.0667 | 0.00094 | 0.7843  | 0.0683 | 0.0692 |
| $N = 32$                                   | 0.0323                          | 0.00048                          | 0.0322 | 0.0323 | 0.00049 | 0.3062  | 0.0331 | 0.0334 |
| $N = 64$                                   | 0.0159                          | 0.00024                          | 0.0159 | 0.0159 | 0.00024 | -0.7890 | 0.0163 | 0.0165 |
| $N = 128$                                  | 0.0079                          | 0.00012                          | 0.0079 | 0.0079 | 0.00012 | -0.8957 | 0.0081 | 0.0082 |
| $N = 256$                                  | 0.0039                          | 0.00006                          | 0.0039 | 0.0039 | 0.00006 | 0.3419  | 0.0040 | 0.0041 |
| $p = 256, V_{\text{rel}}(\mathbf{P}) = 0$  |                                 |                                  |        |        |         |         |        |        |
| $N = 4$                                    | 0.3333                          | 0.00165                          | 0.3330 | 0.3334 | 0.00170 | 1.8964  | 0.3366 | 0.3388 |
| $N = 8$                                    | 0.1429                          | 0.00091                          | 0.1428 | 0.1429 | 0.00091 | 0.0105  | 0.1445 | 0.1453 |
| $N = 16$                                   | 0.0667                          | 0.00047                          | 0.0667 | 0.0667 | 0.00047 | 1.8676  | 0.0675 | 0.0679 |
| $N = 32$                                   | 0.0323                          | 0.00024                          | 0.0323 | 0.0323 | 0.00024 | -0.9701 | 0.0327 | 0.0328 |
| $N = 64$                                   | 0.0159                          | 0.00012                          | 0.0159 | 0.0159 | 0.00012 | 0.3244  | 0.0161 | 0.0162 |
| $N = 128$                                  | 0.0079                          | 0.00006                          | 0.0079 | 0.0079 | 0.00006 | 0.8789  | 0.0080 | 0.0080 |
| $N = 256$                                  | 0.0039                          | 0.00003                          | 0.0039 | 0.0039 | 0.00003 | 0.5874  | 0.0040 | 0.0040 |
| $p = 1024, V_{\text{rel}}(\mathbf{P}) = 0$ |                                 |                                  |        |        |         |         |        |        |
| $N = 4$                                    | 0.3333                          | 0.00041                          | 0.3333 | 0.3333 | 0.00041 | 1.4469  | 0.3342 | 0.3346 |
| $N = 8$                                    | 0.1429                          | 0.00023                          | 0.1428 | 0.1429 | 0.00023 | -0.9639 | 0.1433 | 0.1435 |
| $N = 16$                                   | 0.0667                          | 0.00012                          | 0.0667 | 0.0667 | 0.00012 | 0.5220  | 0.0669 | 0.0670 |
| $N = 32$                                   | 0.0323                          | 0.00006                          | 0.0323 | 0.0323 | 0.00006 | -1.8393 | 0.0324 | 0.0324 |
| $N = 64$                                   | 0.0159                          | 0.00003                          | 0.0159 | 0.0159 | 0.00003 | -0.0357 | 0.0159 | 0.0159 |
| $N = 128$                                  | 0.0079                          | 0.00002                          | 0.0079 | 0.0079 | 0.00002 | 0.1288  | 0.0079 | 0.0079 |
| $N = 256$                                  | 0.0039                          | 0.00001                          | 0.0039 | 0.0039 | 0.00001 | -0.3305 | 0.0039 | 0.0039 |

(continued)



**Table S3.** (continued)

|                                                  | $E[V_{\text{rel}}(\mathbf{R})]$ | $SD[V_{\text{rel}}(\mathbf{R})]$ | Median | Mean   | ESD    | $T$     | Pow. 5% | Pow. 1% |
|--------------------------------------------------|---------------------------------|----------------------------------|--------|--------|--------|---------|---------|---------|
| $p = 2, q = 1, V_{\text{rel}}(\mathbf{P}) = 0.1$ |                                 |                                  |        |        |        |         |         |         |
| $N = 4$                                          | 0.3745                          | 0.3092                           | 0.3229 | 0.3769 | 0.3071 | 0.5423  | 0.0606  | 0.0126  |
| $N = 8$                                          | 0.2108                          | 0.2061                           | 0.1513 | 0.2161 | 0.2092 | 1.7989  | 0.1222  | 0.0372  |
| $N = 16$                                         | 0.1499                          | 0.1420                           | 0.1031 | 0.1437 | 0.1389 | -3.1691 | 0.2126  | 0.0712  |
| $N = 32$                                         | 0.1237                          | 0.1001                           | 0.1050 | 0.1259 | 0.1012 | 1.5152  | 0.4484  | 0.2328  |
| $N = 64$                                         | 0.1115                          | 0.0709                           | 0.1011 | 0.1117 | 0.0702 | 0.2070  | 0.7482  | 0.5448  |
| $N = 128$                                        | 0.1057                          | 0.0502                           | 0.0996 | 0.1047 | 0.0503 | -1.4136 | 0.9612  | 0.8832  |
| $N = 256$                                        | 0.1028                          | 0.0355                           | 0.1018 | 0.1038 | 0.0355 | 1.9926  | 0.9998  | 0.9968  |
| $p = 2, q = 1, V_{\text{rel}}(\mathbf{P}) = 0.2$ |                                 |                                  |        |        |        |         |         |         |
| $N = 4$                                          | 0.4184                          | 0.3169                           | 0.3856 | 0.4190 | 0.3181 | 0.1492  | 0.0826  | 0.0178  |
| $N = 8$                                          | 0.2814                          | 0.2314                           | 0.2368 | 0.2799 | 0.2312 | -0.4442 | 0.1958  | 0.0660  |
| $N = 16$                                         | 0.2350                          | 0.1696                           | 0.2114 | 0.2330 | 0.1682 | -0.8121 | 0.4312  | 0.1894  |
| $N = 32$                                         | 0.2162                          | 0.1229                           | 0.2045 | 0.2162 | 0.1232 | 0.0219  | 0.7550  | 0.5344  |
| $N = 64$                                         | 0.2078                          | 0.0881                           | 0.2054 | 0.2083 | 0.0890 | 0.3926  | 0.9686  | 0.9028  |
| $N = 128$                                        | 0.2038                          | 0.0628                           | 0.2018 | 0.2040 | 0.0623 | 0.1506  | 1.0000  | 0.9990  |
| $N = 256$                                        | 0.2019                          | 0.0446                           | 0.2014 | 0.2025 | 0.0442 | 1.0388  | 1.0000  | 1.0000  |
| $p = 2, q = 1, V_{\text{rel}}(\mathbf{P}) = 0.4$ |                                 |                                  |        |        |        |         |         |         |
| $N = 4$                                          | 0.5158                          | 0.3203                           | 0.5639 | 0.5254 | 0.3179 | 2.1361  | 0.1410  | 0.0274  |
| $N = 8$                                          | 0.4318                          | 0.2495                           | 0.4362 | 0.4294 | 0.2516 | -0.6571 | 0.4256  | 0.1854  |
| $N = 16$                                         | 0.4111                          | 0.1844                           | 0.4230 | 0.4147 | 0.1832 | 1.3640  | 0.8050  | 0.5666  |
| $N = 32$                                         | 0.4046                          | 0.1326                           | 0.4056 | 0.4041 | 0.1322 | -0.2806 | 0.9858  | 0.9388  |
| $N = 64$                                         | 0.4021                          | 0.0944                           | 0.4058 | 0.4025 | 0.0954 | 0.3294  | 1.0000  | 1.0000  |
| $N = 128$                                        | 0.4010                          | 0.0669                           | 0.4020 | 0.4013 | 0.0665 | 0.3770  | 1.0000  | 1.0000  |
| $N = 256$                                        | 0.4005                          | 0.0474                           | 0.4006 | 0.4000 | 0.0480 | -0.7435 | 1.0000  | 1.0000  |
| $p = 2, q = 1, V_{\text{rel}}(\mathbf{P}) = 0.6$ |                                 |                                  |        |        |        |         |         |         |
| $N = 4$                                          | 0.6313                          | 0.3022                           | 0.7219 | 0.6328 | 0.3010 | 0.3570  | 0.2224  | 0.0522  |
| $N = 8$                                          | 0.5973                          | 0.2285                           | 0.6376 | 0.5970 | 0.2281 | -0.0946 | 0.7126  | 0.4182  |
| $N = 16$                                         | 0.5963                          | 0.1608                           | 0.6175 | 0.5980 | 0.1623 | 0.7784  | 0.9678  | 0.8914  |
| $N = 32$                                         | 0.5978                          | 0.1120                           | 0.6072 | 0.5973 | 0.1108 | -0.3007 | 0.9998  | 0.9990  |
| $N = 64$                                         | 0.5988                          | 0.0784                           | 0.6017 | 0.5978 | 0.0787 | -0.8984 | 1.0000  | 1.0000  |
| $N = 128$                                        | 0.5994                          | 0.0551                           | 0.6010 | 0.5991 | 0.0556 | -0.3529 | 1.0000  | 1.0000  |
| $N = 256$                                        | 0.5997                          | 0.0389                           | 0.6008 | 0.5996 | 0.0385 | -0.2220 | 1.0000  | 1.0000  |
| $p = 2, q = 1, V_{\text{rel}}(\mathbf{P}) = 0.8$ |                                 |                                  |        |        |        |         |         |         |
| $N = 4$                                          | 0.7768                          | 0.2440                           | 0.8733 | 0.7748 | 0.2470 | -0.5570 | 0.4220  | 0.1180  |
| $N = 8$                                          | 0.7831                          | 0.1596                           | 0.8250 | 0.7853 | 0.1571 | 0.9790  | 0.9352  | 0.8012  |
| $N = 16$                                         | 0.7918                          | 0.1015                           | 0.8141 | 0.7928 | 0.1033 | 0.6253  | 0.9996  | 0.9956  |
| $N = 32$                                         | 0.7961                          | 0.0674                           | 0.8076 | 0.7976 | 0.0680 | 1.5536  | 1.0000  | 1.0000  |
| $N = 64$                                         | 0.7981                          | 0.0462                           | 0.8024 | 0.7976 | 0.0473 | -0.6617 | 1.0000  | 1.0000  |
| $N = 128$                                        | 0.7991                          | 0.0321                           | 0.8006 | 0.7986 | 0.0319 | -1.0007 | 1.0000  | 1.0000  |
| $N = 256$                                        | 0.7995                          | 0.0225                           | 0.8008 | 0.8001 | 0.0223 | 1.8536  | 1.0000  | 1.0000  |

(continued)

**Table S3.** (continued)

|                                                  | $E[V_{\text{rel}}(\mathbf{R})]$ | $\approx \text{SD}[V_{\text{rel}}(\mathbf{R})]$ | Median | Mean   | ESD    | $T$     | Pow. 5% | Pow. 1% |
|--------------------------------------------------|---------------------------------|-------------------------------------------------|--------|--------|--------|---------|---------|---------|
| $p = 4, q = 1, V_{\text{rel}}(\mathbf{P}) = 0.1$ |                                 |                                                 |        |        |        |         |         |         |
| $N = 4$                                          | 0.3745                          | 0.1986                                          | 0.3467 | 0.3755 | 0.1470 | 0.4579  | 0.1144  | 0.0368  |
| $N = 8$                                          | 0.2108                          | 0.1300                                          | 0.1917 | 0.2134 | 0.1115 | 1.6596  | 0.2484  | 0.1262  |
| $N = 16$                                         | 0.1499                          | 0.0888                                          | 0.1373 | 0.1511 | 0.0815 | 1.0182  | 0.5380  | 0.3360  |
| $N = 32$                                         | 0.1237                          | 0.0618                                          | 0.1155 | 0.1240 | 0.0594 | 0.3959  | 0.8520  | 0.7024  |
| $N = 64$                                         | 0.1115                          | 0.0433                                          | 0.1070 | 0.1116 | 0.0429 | 0.0896  | 0.9884  | 0.9720  |
| $N = 128$                                        | 0.1057                          | 0.0305                                          | 0.1045 | 0.1065 | 0.0303 | 1.9867  | 1.0000  | 0.9998  |
| $N = 256$                                        | 0.1028                          | 0.0215                                          | 0.1016 | 0.1025 | 0.0213 | -1.0710 | 1.0000  | 1.0000  |
| $p = 4, q = 1, V_{\text{rel}}(\mathbf{P}) = 0.2$ |                                 |                                                 |        |        |        |         |         |         |
| $N = 4$                                          | 0.4184                          | 0.2729                                          | 0.3831 | 0.4167 | 0.1663 | -0.7193 | 0.1916  | 0.0690  |
| $N = 8$                                          | 0.2814                          | 0.1786                                          | 0.2562 | 0.2822 | 0.1433 | 0.4227  | 0.4578  | 0.2962  |
| $N = 16$                                         | 0.2350                          | 0.1220                                          | 0.2242 | 0.2352 | 0.1090 | 0.1625  | 0.8206  | 0.6788  |
| $N = 32$                                         | 0.2162                          | 0.0849                                          | 0.2107 | 0.2156 | 0.0792 | -0.5585 | 0.9862  | 0.9592  |
| $N = 64$                                         | 0.2078                          | 0.0595                                          | 0.2040 | 0.2076 | 0.0584 | -0.1842 | 1.0000  | 1.0000  |
| $N = 128$                                        | 0.2038                          | 0.0419                                          | 0.2011 | 0.2028 | 0.0411 | -1.6816 | 1.0000  | 1.0000  |
| $N = 256$                                        | 0.2019                          | 0.0296                                          | 0.2016 | 0.2023 | 0.0297 | 0.8644  | 1.0000  | 1.0000  |
| $p = 4, q = 1, V_{\text{rel}}(\mathbf{P}) = 0.4$ |                                 |                                                 |        |        |        |         |         |         |
| $N = 4$                                          | 0.5158                          | 0.3175                                          | 0.4927 | 0.5144 | 0.2023 | -0.4921 | 0.3980  | 0.2132  |
| $N = 8$                                          | 0.4318                          | 0.2078                                          | 0.4314 | 0.4287 | 0.1750 | -1.2271 | 0.7814  | 0.6600  |
| $N = 16$                                         | 0.4111                          | 0.1420                                          | 0.4141 | 0.4093 | 0.1317 | -0.9769 | 0.9866  | 0.9596  |
| $N = 32$                                         | 0.4046                          | 0.0988                                          | 0.4054 | 0.4034 | 0.0960 | -0.8743 | 1.0000  | 1.0000  |
| $N = 64$                                         | 0.4021                          | 0.0693                                          | 0.4033 | 0.4022 | 0.0687 | 0.1270  | 1.0000  | 1.0000  |
| $N = 128$                                        | 0.4010                          | 0.0488                                          | 0.4016 | 0.4003 | 0.0484 | -0.9561 | 1.0000  | 1.0000  |
| $N = 256$                                        | 0.4005                          | 0.0344                                          | 0.3998 | 0.3997 | 0.0336 | -1.7358 | 1.0000  | 1.0000  |
| $p = 4, q = 1, V_{\text{rel}}(\mathbf{P}) = 0.6$ |                                 |                                                 |        |        |        |         |         |         |
| $N = 4$                                          | 0.6313                          | 0.2736                                          | 0.6644 | 0.6329 | 0.2101 | 0.5400  | 0.6206  | 0.4366  |
| $N = 8$                                          | 0.5973                          | 0.1791                                          | 0.6219 | 0.5978 | 0.1714 | 0.2242  | 0.9456  | 0.9046  |
| $N = 16$                                         | 0.5963                          | 0.1223                                          | 0.6106 | 0.5949 | 0.1216 | -0.7641 | 0.9994  | 0.9986  |
| $N = 32$                                         | 0.5978                          | 0.0851                                          | 0.6047 | 0.5975 | 0.0846 | -0.1828 | 1.0000  | 1.0000  |
| $N = 64$                                         | 0.5988                          | 0.0597                                          | 0.6019 | 0.5985 | 0.0606 | -0.3532 | 1.0000  | 1.0000  |
| $N = 128$                                        | 0.5994                          | 0.0420                                          | 0.6005 | 0.5980 | 0.0422 | -2.2753 | 1.0000  | 1.0000  |
| $N = 256$                                        | 0.5997                          | 0.0297                                          | 0.6006 | 0.5996 | 0.0304 | -0.3144 | 1.0000  | 1.0000  |
| $p = 4, q = 1, V_{\text{rel}}(\mathbf{P}) = 0.8$ |                                 |                                                 |        |        |        |         |         |         |
| $N = 4$                                          | 0.7768                          | 0.1640                                          | 0.8388 | 0.7754 | 0.1873 | -0.5322 | 0.8496  | 0.7278  |
| $N = 8$                                          | 0.7831                          | 0.1073                                          | 0.8149 | 0.7840 | 0.1249 | 0.4605  | 0.9970  | 0.9896  |
| $N = 16$                                         | 0.7918                          | 0.0733                                          | 0.8059 | 0.7913 | 0.0815 | -0.4682 | 1.0000  | 0.9998  |
| $N = 32$                                         | 0.7961                          | 0.0510                                          | 0.8027 | 0.7953 | 0.0543 | -1.0173 | 1.0000  | 1.0000  |
| $N = 64$                                         | 0.7981                          | 0.0358                                          | 0.8019 | 0.7987 | 0.0370 | 1.2077  | 1.0000  | 1.0000  |
| $N = 128$                                        | 0.7991                          | 0.0252                                          | 0.8008 | 0.7991 | 0.0255 | 0.1156  | 1.0000  | 1.0000  |
| $N = 256$                                        | 0.7995                          | 0.0178                                          | 0.8003 | 0.7995 | 0.0176 | 0.0407  | 1.0000  | 1.0000  |

(continued)

**Table S3.** (continued)

|                                                  | $E[V_{\text{rel}}(\mathbf{R})]$ | $\approx \text{SD}[V_{\text{rel}}(\mathbf{R})]$ | Median | Mean   | ESD    | $T$     | Pow. 5% | Pow. 1% |
|--------------------------------------------------|---------------------------------|-------------------------------------------------|--------|--------|--------|---------|---------|---------|
| $p = 4, q = 2, V_{\text{rel}}(\mathbf{P}) = 0.1$ |                                 |                                                 |        |        |        |         |         |         |
| $N = 4$                                          | 0.3773                          | 0.1043                                          | 0.3512 | 0.3774 | 0.1431 | 0.0581  | 0.1082  | 0.0342  |
| $N = 8$                                          | 0.2135                          | 0.0683                                          | 0.2034 | 0.2142 | 0.0884 | 0.5188  | 0.2168  | 0.0820  |
| $N = 16$                                         | 0.1518                          | 0.0467                                          | 0.1465 | 0.1514 | 0.0570 | -0.4810 | 0.6370  | 0.3098  |
| $N = 32$                                         | 0.1248                          | 0.0325                                          | 0.1233 | 0.1255 | 0.0361 | 1.3664  | 0.9658  | 0.8672  |
| $N = 64$                                         | 0.1121                          | 0.0228                                          | 0.1115 | 0.1125 | 0.0245 | 1.0436  | 1.0000  | 0.9992  |
| $N = 128$                                        | 0.1060                          | 0.0160                                          | 0.1057 | 0.1061 | 0.0166 | 0.3845  | 1.0000  | 1.0000  |
| $N = 256$                                        | 0.1030                          | 0.0113                                          | 0.1025 | 0.1027 | 0.0116 | -1.9263 | 1.0000  | 1.0000  |
| $p = 4, q = 2, V_{\text{rel}}(\mathbf{P}) = 0.2$ |                                 |                                                 |        |        |        |         |         |         |
| $N = 4$                                          | 0.4327                          | 0.0843                                          | 0.3983 | 0.4377 | 0.1622 | 2.1772  | 0.2110  | 0.0806  |
| $N = 8$                                          | 0.2943                          | 0.0552                                          | 0.2784 | 0.2948 | 0.1011 | 0.3354  | 0.5266  | 0.2416  |
| $N = 16$                                         | 0.2432                          | 0.0377                                          | 0.2373 | 0.2428 | 0.0578 | -0.4744 | 0.9880  | 0.9142  |
| $N = 32$                                         | 0.2208                          | 0.0262                                          | 0.2202 | 0.2212 | 0.0357 | 0.8814  | 1.0000  | 1.0000  |
| $N = 64$                                         | 0.2102                          | 0.0184                                          | 0.2097 | 0.2100 | 0.0220 | -0.4393 | 1.0000  | 1.0000  |
| $N = 128$                                        | 0.2050                          | 0.0130                                          | 0.2052 | 0.2049 | 0.0146 | -0.5257 | 1.0000  | 1.0000  |
| $N = 256$                                        | 0.2025                          | 0.0091                                          | 0.2025 | 0.2025 | 0.0096 | 0.2252  | 1.0000  | 1.0000  |
| $p = 4, q = 2, V_{\text{rel}}(\mathbf{P}) = 0.4$ |                                 |                                                 |        |        |        |         |         |         |
| (This conformation is impossible)                |                                 |                                                 |        |        |        |         |         |         |

(continued)

**Table S3.** (continued)

|                                                  | $E[V_{\text{rel}}(\mathbf{R})]$ | $\approx \text{SD}[V_{\text{rel}}(\mathbf{R})]$ | Median | Mean   | ESD    | $T$     | Pow. 5% | Pow. 1% |
|--------------------------------------------------|---------------------------------|-------------------------------------------------|--------|--------|--------|---------|---------|---------|
| $p = 8, q = 1, V_{\text{rel}}(\mathbf{P}) = 0.1$ |                                 |                                                 |        |        |        |         |         |         |
| $N = 4$                                          | 0.3745                          | 0.1516                                          | 0.3546 | 0.3735 | 0.0876 | -0.7927 | 0.1848  | 0.0746  |
| $N = 8$                                          | 0.2108                          | 0.0993                                          | 0.1930 | 0.2101 | 0.0762 | -0.6583 | 0.4750  | 0.3218  |
| $N = 16$                                         | 0.1499                          | 0.0678                                          | 0.1394 | 0.1496 | 0.0590 | -0.3952 | 0.8288  | 0.7152  |
| $N = 32$                                         | 0.1237                          | 0.0472                                          | 0.1193 | 0.1238 | 0.0440 | 0.2041  | 0.9884  | 0.9706  |
| $N = 64$                                         | 0.1115                          | 0.0331                                          | 0.1091 | 0.1119 | 0.0323 | 0.7713  | 0.9998  | 0.9996  |
| $N = 128$                                        | 0.1057                          | 0.0233                                          | 0.1045 | 0.1053 | 0.0228 | -1.1017 | 1.0000  | 1.0000  |
| $N = 256$                                        | 0.1028                          | 0.0164                                          | 0.1020 | 0.1030 | 0.0165 | 0.6914  | 1.0000  | 1.0000  |
| $p = 8, q = 1, V_{\text{rel}}(\mathbf{P}) = 0.2$ |                                 |                                                 |        |        |        |         |         |         |
| $N = 4$                                          | 0.4184                          | 0.2228                                          | 0.3921 | 0.4189 | 0.1187 | 0.3123  | 0.3430  | 0.1946  |
| $N = 8$                                          | 0.2814                          | 0.1459                                          | 0.2643 | 0.2826 | 0.1088 | 0.7886  | 0.7554  | 0.6256  |
| $N = 16$                                         | 0.2350                          | 0.0997                                          | 0.2253 | 0.2336 | 0.0864 | -1.1163 | 0.9706  | 0.9458  |
| $N = 32$                                         | 0.2162                          | 0.0693                                          | 0.2124 | 0.2164 | 0.0658 | 0.1980  | 1.0000  | 0.9998  |
| $N = 64$                                         | 0.2078                          | 0.0486                                          | 0.2052 | 0.2072 | 0.0480 | -0.9238 | 1.0000  | 1.0000  |
| $N = 128$                                        | 0.2038                          | 0.0342                                          | 0.2040 | 0.2046 | 0.0333 | 1.6580  | 1.0000  | 1.0000  |
| $N = 256$                                        | 0.2019                          | 0.0242                                          | 0.2015 | 0.2017 | 0.0241 | -0.6367 | 1.0000  | 1.0000  |
| $p = 8, q = 1, V_{\text{rel}}(\mathbf{P}) = 0.4$ |                                 |                                                 |        |        |        |         |         |         |
| $N = 4$                                          | 0.5158                          | 0.2753                                          | 0.4939 | 0.5144 | 0.1590 | -0.6168 | 0.6076  | 0.4548  |
| $N = 8$                                          | 0.4318                          | 0.1802                                          | 0.4270 | 0.4286 | 0.1493 | -1.5260 | 0.9392  | 0.8950  |
| $N = 16$                                         | 0.4111                          | 0.1231                                          | 0.4143 | 0.4127 | 0.1120 | 1.0025  | 0.9990  | 0.9986  |
| $N = 32$                                         | 0.4046                          | 0.0856                                          | 0.4066 | 0.4046 | 0.0835 | -0.0028 | 1.0000  | 1.0000  |
| $N = 64$                                         | 0.4021                          | 0.0601                                          | 0.4032 | 0.4023 | 0.0590 | 0.2713  | 1.0000  | 1.0000  |
| $N = 128$                                        | 0.4010                          | 0.0423                                          | 0.4019 | 0.4014 | 0.0419 | 0.7597  | 1.0000  | 1.0000  |
| $N = 256$                                        | 0.4005                          | 0.0299                                          | 0.4003 | 0.4001 | 0.0293 | -0.8777 | 1.0000  | 1.0000  |
| $p = 8, q = 1, V_{\text{rel}}(\mathbf{P}) = 0.6$ |                                 |                                                 |        |        |        |         |         |         |
| $N = 4$                                          | 0.6313                          | 0.2447                                          | 0.6492 | 0.6303 | 0.1808 | -0.3763 | 0.8000  | 0.7026  |
| $N = 8$                                          | 0.5973                          | 0.1602                                          | 0.6178 | 0.5958 | 0.1530 | -0.6788 | 0.9932  | 0.9826  |
| $N = 16$                                         | 0.5963                          | 0.1094                                          | 0.6130 | 0.5984 | 0.1090 | 1.4179  | 0.9998  | 0.9998  |
| $N = 32$                                         | 0.5978                          | 0.0761                                          | 0.6017 | 0.5954 | 0.0778 | -2.0986 | 1.0000  | 1.0000  |
| $N = 64$                                         | 0.5988                          | 0.0534                                          | 0.6008 | 0.5984 | 0.0540 | -0.5764 | 1.0000  | 1.0000  |
| $N = 128$                                        | 0.5994                          | 0.0376                                          | 0.6012 | 0.5992 | 0.0371 | -0.3409 | 1.0000  | 1.0000  |
| $N = 256$                                        | 0.5997                          | 0.0265                                          | 0.6008 | 0.5995 | 0.0266 | -0.4008 | 1.0000  | 1.0000  |
| $p = 8, q = 1, V_{\text{rel}}(\mathbf{P}) = 0.8$ |                                 |                                                 |        |        |        |         |         |         |
| $N = 4$                                          | 0.7768                          | 0.1496                                          | 0.8337 | 0.7780 | 0.1658 | 0.5054  | 0.9350  | 0.8998  |
| $N = 8$                                          | 0.7831                          | 0.0979                                          | 0.8104 | 0.7828 | 0.1154 | -0.2029 | 0.9996  | 0.9992  |
| $N = 16$                                         | 0.7918                          | 0.0669                                          | 0.8028 | 0.7899 | 0.0749 | -1.8621 | 1.0000  | 1.0000  |
| $N = 32$                                         | 0.7961                          | 0.0465                                          | 0.8017 | 0.7965 | 0.0479 | 0.6755  | 1.0000  | 1.0000  |
| $N = 64$                                         | 0.7981                          | 0.0326                                          | 0.8001 | 0.7975 | 0.0332 | -1.1567 | 1.0000  | 1.0000  |
| $N = 128$                                        | 0.7991                          | 0.0230                                          | 0.8008 | 0.7994 | 0.0232 | 0.9506  | 1.0000  | 1.0000  |
| $N = 256$                                        | 0.7995                          | 0.0162                                          | 0.7999 | 0.7993 | 0.0162 | -1.2035 | 1.0000  | 1.0000  |

(continued)

**Table S3.** (continued)

|                                                  | $E[V_{\text{rel}}(\mathbf{R})]$ | $\approx \text{SD}[V_{\text{rel}}(\mathbf{R})]$ | Median | Mean   | ESD    | $T$     | Pow. 5% | Pow. 1% |
|--------------------------------------------------|---------------------------------|-------------------------------------------------|--------|--------|--------|---------|---------|---------|
| $p = 8, q = 2, V_{\text{rel}}(\mathbf{P}) = 0.1$ |                                 |                                                 |        |        |        |         |         |         |
| $N = 4$                                          | 0.3763                          | 0.0874                                          | 0.3606 | 0.3752 | 0.0815 | -0.9284 | 0.1786  | 0.0626  |
| $N = 8$                                          | 0.2126                          | 0.0572                                          | 0.2057 | 0.2129 | 0.0588 | 0.4217  | 0.5632  | 0.3392  |
| $N = 16$                                         | 0.1511                          | 0.0391                                          | 0.1473 | 0.1509 | 0.0402 | -0.4468 | 0.9354  | 0.8492  |
| $N = 32$                                         | 0.1244                          | 0.0272                                          | 0.1231 | 0.1244 | 0.0277 | -0.0301 | 1.0000  | 0.9984  |
| $N = 64$                                         | 0.1119                          | 0.0191                                          | 0.1107 | 0.1112 | 0.0193 | -2.8395 | 1.0000  | 1.0000  |
| $N = 128$                                        | 0.1059                          | 0.0134                                          | 0.1058 | 0.1060 | 0.0135 | 0.7249  | 1.0000  | 1.0000  |
| $N = 256$                                        | 0.1029                          | 0.0095                                          | 0.1029 | 0.1029 | 0.0095 | -0.3405 | 1.0000  | 1.0000  |
| $p = 8, q = 2, V_{\text{rel}}(\mathbf{P}) = 0.2$ |                                 |                                                 |        |        |        |         |         |         |
| $N = 4$                                          | 0.4270                          | 0.0943                                          | 0.4066 | 0.4284 | 0.1047 | 0.9149  | 0.3598  | 0.1860  |
| $N = 8$                                          | 0.2895                          | 0.0617                                          | 0.2813 | 0.2891 | 0.0748 | -0.4132 | 0.9128  | 0.7928  |
| $N = 16$                                         | 0.2403                          | 0.0422                                          | 0.2369 | 0.2398 | 0.0502 | -0.7208 | 0.9996  | 0.9974  |
| $N = 32$                                         | 0.2192                          | 0.0293                                          | 0.2186 | 0.2191 | 0.0325 | -0.2502 | 1.0000  | 1.0000  |
| $N = 64$                                         | 0.2094                          | 0.0206                                          | 0.2092 | 0.2091 | 0.0220 | -0.7467 | 1.0000  | 1.0000  |
| $N = 128$                                        | 0.2046                          | 0.0145                                          | 0.2045 | 0.2046 | 0.0149 | -0.1112 | 1.0000  | 1.0000  |
| $N = 256$                                        | 0.2023                          | 0.0102                                          | 0.2024 | 0.2023 | 0.0101 | -0.1530 | 1.0000  | 1.0000  |
| $p = 8, q = 2, V_{\text{rel}}(\mathbf{P}) = 0.4$ |                                 |                                                 |        |        |        |         |         |         |
| $N = 4$                                          | 0.5793                          | 0.0182                                          | 0.5317 | 0.5781 | 0.1562 | -0.5295 | 0.7550  | 0.5354  |
| $N = 8$                                          | 0.4772                          | 0.0119                                          | 0.4436 | 0.4764 | 0.0891 | -0.6747 | 1.0000  | 1.0000  |
| $N = 16$                                         | 0.4363                          | 0.0082                                          | 0.4192 | 0.4355 | 0.0469 | -1.0874 | 1.0000  | 1.0000  |
| $N = 32$                                         | 0.4176                          | 0.0057                                          | 0.4098 | 0.4178 | 0.0244 | 0.5427  | 1.0000  | 1.0000  |
| $N = 64$                                         | 0.4087                          | 0.0040                                          | 0.4053 | 0.4086 | 0.0126 | -0.1456 | 1.0000  | 1.0000  |
| $N = 128$                                        | 0.4043                          | 0.0028                                          | 0.4030 | 0.4043 | 0.0066 | 0.2277  | 1.0000  | 1.0000  |
| $N = 256$                                        | 0.4021                          | 0.0020                                          | 0.4016 | 0.4022 | 0.0037 | 0.5998  | 1.0000  | 1.0000  |
| $p = 8, q = 4, V_{\text{rel}}(\mathbf{P}) = 0.1$ |                                 |                                                 |        |        |        |         |         |         |
| $N = 4$                                          | 0.3856                          | 0.0207                                          | 0.3724 | 0.3860 | 0.0845 | 0.3568  | 0.2128  | 0.0802  |
| $N = 8$                                          | 0.2206                          | 0.0136                                          | 0.2147 | 0.2213 | 0.0493 | 0.9737  | 0.6566  | 0.3774  |
| $N = 16$                                         | 0.1561                          | 0.0093                                          | 0.1529 | 0.1564 | 0.0271 | 0.8081  | 0.9998  | 0.9846  |
| $N = 32$                                         | 0.1271                          | 0.0064                                          | 0.1256 | 0.1271 | 0.0142 | 0.1225  | 1.0000  | 1.0000  |
| $N = 64$                                         | 0.1133                          | 0.0045                                          | 0.1127 | 0.1134 | 0.0080 | 0.7534  | 1.0000  | 1.0000  |
| $N = 128$                                        | 0.1066                          | 0.0032                                          | 0.1064 | 0.1066 | 0.0046 | -0.6650 | 1.0000  | 1.0000  |
| $N = 256$                                        | 0.1033                          | 0.0022                                          | 0.1032 | 0.1033 | 0.0028 | -1.0577 | 1.0000  | 1.0000  |

$p = 8, q = 4, V_{\text{rel}}(\mathbf{P}) = 0.2$

(This conformation is impossible)

(continued)

**Table S3.** (continued)

|                                                   | $E[V_{\text{rel}}(\mathbf{R})]$ | $\approx \text{SD}[V_{\text{rel}}(\mathbf{R})]$ | Median | Mean   | ESD    | $T$     | Pow. 5% | Pow. 1% |
|---------------------------------------------------|---------------------------------|-------------------------------------------------|--------|--------|--------|---------|---------|---------|
| $p = 16, q = 1, V_{\text{rel}}(\mathbf{P}) = 0.1$ |                                 |                                                 |        |        |        |         |         |         |
| $N = 4$                                           | 0.3745                          | 0.1309                                          | 0.3567 | 0.3753 | 0.0655 | 0.8685  | 0.3218  | 0.2192  |
| $N = 8$                                           | 0.2108                          | 0.0857                                          | 0.1975 | 0.2120 | 0.0627 | 1.3379  | 0.7088  | 0.5934  |
| $N = 16$                                          | 0.1499                          | 0.0585                                          | 0.1417 | 0.1494 | 0.0505 | -0.6621 | 0.9526  | 0.9194  |
| $N = 32$                                          | 0.1237                          | 0.0407                                          | 0.1198 | 0.1236 | 0.0382 | -0.1200 | 0.9994  | 0.9990  |
| $N = 64$                                          | 0.1115                          | 0.0286                                          | 0.1090 | 0.1117 | 0.0279 | 0.3795  | 1.0000  | 1.0000  |
| $N = 128$                                         | 0.1057                          | 0.0201                                          | 0.1049 | 0.1058 | 0.0199 | 0.4730  | 1.0000  | 1.0000  |
| $N = 256$                                         | 0.1028                          | 0.0142                                          | 0.1024 | 0.1028 | 0.0141 | 0.0272  | 1.0000  | 1.0000  |
| $p = 16, q = 1, V_{\text{rel}}(\mathbf{P}) = 0.2$ |                                 |                                                 |        |        |        |         |         |         |
| $N = 4$                                           | 0.4184                          | 0.2009                                          | 0.3923 | 0.4189 | 0.0975 | 0.3846  | 0.5308  | 0.4138  |
| $N = 8$                                           | 0.2814                          | 0.1315                                          | 0.2670 | 0.2819 | 0.0970 | 0.3873  | 0.8970  | 0.8414  |
| $N = 16$                                          | 0.2350                          | 0.0898                                          | 0.2273 | 0.2353 | 0.0780 | 0.2734  | 0.9974  | 0.9944  |
| $N = 32$                                          | 0.2162                          | 0.0625                                          | 0.2130 | 0.2152 | 0.0580 | -1.2665 | 1.0000  | 1.0000  |
| $N = 64$                                          | 0.2078                          | 0.0438                                          | 0.2068 | 0.2077 | 0.0425 | -0.1913 | 1.0000  | 1.0000  |
| $N = 128$                                         | 0.2038                          | 0.0309                                          | 0.2026 | 0.2032 | 0.0303 | -1.4818 | 1.0000  | 1.0000  |
| $N = 256$                                         | 0.2019                          | 0.0218                                          | 0.2014 | 0.2018 | 0.0216 | -0.1586 | 1.0000  | 1.0000  |
| $p = 16, q = 1, V_{\text{rel}}(\mathbf{P}) = 0.4$ |                                 |                                                 |        |        |        |         |         |         |
| $N = 4$                                           | 0.5158                          | 0.2570                                          | 0.4947 | 0.5167 | 0.1433 | 0.4595  | 0.7744  | 0.6966  |
| $N = 8$                                           | 0.4318                          | 0.1682                                          | 0.4321 | 0.4329 | 0.1391 | 0.5780  | 0.9820  | 0.9714  |
| $N = 16$                                          | 0.4111                          | 0.1149                                          | 0.4149 | 0.4120 | 0.1073 | 0.5980  | 1.0000  | 1.0000  |
| $N = 32$                                          | 0.4046                          | 0.0799                                          | 0.4084 | 0.4055 | 0.0773 | 0.7996  | 1.0000  | 1.0000  |
| $N = 64$                                          | 0.4021                          | 0.0561                                          | 0.4030 | 0.4021 | 0.0552 | -0.0283 | 1.0000  | 1.0000  |
| $N = 128$                                         | 0.4010                          | 0.0395                                          | 0.4022 | 0.4019 | 0.0395 | 1.7153  | 1.0000  | 1.0000  |
| $N = 256$                                         | 0.4005                          | 0.0279                                          | 0.4005 | 0.4003 | 0.0281 | -0.4201 | 1.0000  | 1.0000  |
| $p = 16, q = 1, V_{\text{rel}}(\mathbf{P}) = 0.6$ |                                 |                                                 |        |        |        |         |         |         |
| $N = 4$                                           | 0.6313                          | 0.2322                                          | 0.6468 | 0.6306 | 0.1707 | -0.2806 | 0.8956  | 0.8606  |
| $N = 8$                                           | 0.5973                          | 0.1520                                          | 0.6162 | 0.5970 | 0.1467 | -0.1359 | 0.9974  | 0.9960  |
| $N = 16$                                          | 0.5963                          | 0.1039                                          | 0.6084 | 0.5967 | 0.1047 | 0.3048  | 1.0000  | 1.0000  |
| $N = 32$                                          | 0.5978                          | 0.0722                                          | 0.6040 | 0.5979 | 0.0726 | 0.1795  | 1.0000  | 1.0000  |
| $N = 64$                                          | 0.5988                          | 0.0507                                          | 0.6013 | 0.5986 | 0.0510 | -0.2188 | 1.0000  | 1.0000  |
| $N = 128$                                         | 0.5994                          | 0.0357                                          | 0.6010 | 0.5997 | 0.0362 | 0.6137  | 1.0000  | 1.0000  |
| $N = 256$                                         | 0.5997                          | 0.0252                                          | 0.6001 | 0.5994 | 0.0253 | -0.8911 | 1.0000  | 1.0000  |
| $p = 16, q = 1, V_{\text{rel}}(\mathbf{P}) = 0.8$ |                                 |                                                 |        |        |        |         |         |         |
| $N = 4$                                           | 0.7768                          | 0.1435                                          | 0.8260 | 0.7751 | 0.1589 | -0.7708 | 0.9692  | 0.9554  |
| $N = 8$                                           | 0.7831                          | 0.0939                                          | 0.8102 | 0.7835 | 0.1116 | 0.2370  | 0.9998  | 0.9998  |
| $N = 16$                                          | 0.7918                          | 0.0642                                          | 0.8045 | 0.7913 | 0.0716 | -0.5326 | 1.0000  | 1.0000  |
| $N = 32$                                          | 0.7961                          | 0.0446                                          | 0.8035 | 0.7976 | 0.0457 | 2.4043  | 1.0000  | 1.0000  |
| $N = 64$                                          | 0.7981                          | 0.0313                                          | 0.8013 | 0.7984 | 0.0325 | 0.7108  | 1.0000  | 1.0000  |
| $N = 128$                                         | 0.7991                          | 0.0221                                          | 0.7997 | 0.7985 | 0.0224 | -1.8772 | 1.0000  | 1.0000  |
| $N = 256$                                         | 0.7995                          | 0.0156                                          | 0.7998 | 0.7995 | 0.0157 | -0.3465 | 1.0000  | 1.0000  |

(continued)

**Table S3.** (continued)

|                                                   | $E[V_{\text{rel}}(\mathbf{R})]$ | $\approx \text{SD}[V_{\text{rel}}(\mathbf{R})]$ | Median | Mean   | ESD    | $T$     | Pow. 5% | Pow. 1% |
|---------------------------------------------------|---------------------------------|-------------------------------------------------|--------|--------|--------|---------|---------|---------|
| $p = 16, q = 2, V_{\text{rel}}(\mathbf{P}) = 0.1$ |                                 |                                                 |        |        |        |         |         |         |
| $N = 4$                                           | 0.3760                          | 0.0759                                          | 0.3629 | 0.3754 | 0.0568 | -0.7850 | 0.3492  | 0.2086  |
| $N = 8$                                           | 0.2123                          | 0.0497                                          | 0.2064 | 0.2116 | 0.0442 | -1.0713 | 0.8342  | 0.7150  |
| $N = 16$                                          | 0.1510                          | 0.0340                                          | 0.1484 | 0.1508 | 0.0321 | -0.2952 | 0.9966  | 0.9900  |
| $N = 32$                                          | 0.1243                          | 0.0236                                          | 0.1239 | 0.1246 | 0.0236 | 0.8037  | 1.0000  | 1.0000  |
| $N = 64$                                          | 0.1119                          | 0.0166                                          | 0.1114 | 0.1120 | 0.0165 | 0.5617  | 1.0000  | 1.0000  |
| $N = 128$                                         | 0.1059                          | 0.0117                                          | 0.1055 | 0.1057 | 0.0116 | -1.1433 | 1.0000  | 1.0000  |
| $N = 256$                                         | 0.1029                          | 0.0082                                          | 0.1024 | 0.1027 | 0.0083 | -1.6560 | 1.0000  | 1.0000  |
| $p = 16, q = 2, V_{\text{rel}}(\mathbf{P}) = 0.2$ |                                 |                                                 |        |        |        |         |         |         |
| $N = 4$                                           | 0.4256                          | 0.0909                                          | 0.4075 | 0.4256 | 0.0827 | 0.0263  | 0.6414  | 0.4660  |
| $N = 8$                                           | 0.2882                          | 0.0595                                          | 0.2814 | 0.2885 | 0.0624 | 0.2671  | 0.9890  | 0.9756  |
| $N = 16$                                          | 0.2395                          | 0.0406                                          | 0.2368 | 0.2388 | 0.0439 | -1.0447 | 1.0000  | 1.0000  |
| $N = 32$                                          | 0.2188                          | 0.0283                                          | 0.2180 | 0.2186 | 0.0298 | -0.2548 | 1.0000  | 1.0000  |
| $N = 64$                                          | 0.2091                          | 0.0198                                          | 0.2087 | 0.2084 | 0.0205 | -2.4858 | 1.0000  | 1.0000  |
| $N = 128$                                         | 0.2045                          | 0.0140                                          | 0.2045 | 0.2044 | 0.0142 | -0.7333 | 1.0000  | 1.0000  |
| $N = 256$                                         | 0.2022                          | 0.0099                                          | 0.2024 | 0.2025 | 0.0096 | 1.5185  | 1.0000  | 1.0000  |
| $p = 16, q = 2, V_{\text{rel}}(\mathbf{P}) = 0.4$ |                                 |                                                 |        |        |        |         |         |         |
| $N = 4$                                           | 0.5640                          | 0.0370                                          | 0.5251 | 0.5645 | 0.1328 | 0.2332  | 0.9850  | 0.9482  |
| $N = 8$                                           | 0.4687                          | 0.0242                                          | 0.4450 | 0.4679 | 0.0790 | -0.7910 | 1.0000  | 1.0000  |
| $N = 16$                                          | 0.4322                          | 0.0165                                          | 0.4220 | 0.4323 | 0.0439 | 0.2191  | 1.0000  | 1.0000  |
| $N = 32$                                          | 0.4156                          | 0.0115                                          | 0.4115 | 0.4153 | 0.0229 | -1.0161 | 1.0000  | 1.0000  |
| $N = 64$                                          | 0.4077                          | 0.0081                                          | 0.4064 | 0.4076 | 0.0128 | -0.6659 | 1.0000  | 1.0000  |
| $N = 128$                                         | 0.4038                          | 0.0057                                          | 0.4033 | 0.4039 | 0.0078 | 0.2858  | 1.0000  | 1.0000  |
| $N = 256$                                         | 0.4019                          | 0.0040                                          | 0.4017 | 0.4018 | 0.0048 | -1.0195 | 1.0000  | 1.0000  |
| $p = 16, q = 4, V_{\text{rel}}(\mathbf{P}) = 0.1$ |                                 |                                                 |        |        |        |         |         |         |
| $N = 4$                                           | 0.3808                          | 0.0305                                          | 0.3711 | 0.3802 | 0.0542 | -0.7788 | 0.3896  | 0.2272  |
| $N = 8$                                           | 0.2168                          | 0.0199                                          | 0.2115 | 0.2161 | 0.0343 | -1.4581 | 0.9428  | 0.8348  |
| $N = 16$                                          | 0.1538                          | 0.0136                                          | 0.1516 | 0.1542 | 0.0213 | 1.0745  | 1.0000  | 1.0000  |
| $N = 32$                                          | 0.1259                          | 0.0095                                          | 0.1249 | 0.1255 | 0.0127 | -2.3988 | 1.0000  | 1.0000  |
| $N = 64$                                          | 0.1127                          | 0.0066                                          | 0.1127 | 0.1127 | 0.0079 | -0.1133 | 1.0000  | 1.0000  |
| $N = 128$                                         | 0.1063                          | 0.0047                                          | 0.1063 | 0.1064 | 0.0052 | 1.6837  | 1.0000  | 1.0000  |
| $N = 256$                                         | 0.1031                          | 0.0033                                          | 0.1031 | 0.1031 | 0.0035 | -0.2266 | 1.0000  | 1.0000  |
| $p = 16, q = 4, V_{\text{rel}}(\mathbf{P}) = 0.2$ |                                 |                                                 |        |        |        |         |         |         |
| $N = 4$                                           | 0.4667                          | 0*                                              | 0.4502 | 0.4641 | 0.0972 | -1.8454 | 0.7790  | 0.6708  |
| $N = 8$                                           | 0.3143                          | 0*                                              | 0.3049 | 0.3131 | 0.0529 | -1.6415 | 1.0000  | 1.0000  |
| $N = 16$                                          | 0.2533                          | 0*                                              | 0.2485 | 0.2528 | 0.0275 | -1.2473 | 1.0000  | 1.0000  |
| $N = 32$                                          | 0.2258                          | 0*                                              | 0.2234 | 0.2258 | 0.0142 | 0.1036  | 1.0000  | 1.0000  |
| $N = 64$                                          | 0.2127                          | 0*                                              | 0.2113 | 0.2126 | 0.0071 | -1.1940 | 1.0000  | 1.0000  |
| $N = 128$                                         | 0.2063                          | 0*                                              | 0.2057 | 0.2064 | 0.0036 | 1.7598  | 1.0000  | 1.0000  |
| $N = 256$                                         | 0.2031                          | 0*                                              | 0.2028 | 0.2031 | 0.0018 | -0.4979 | 1.0000  | 1.0000  |

\*In this case,  $\mathbf{P}$  is singular and the asymptotic expression yields 0 (which is obviously spurious).

(continued)

**Table S3.** (continued)

|                                                   | $E[V_{\text{rel}}(\mathbf{R})]$ | $\approx \text{SD}[V_{\text{rel}}(\mathbf{R})]$ | Median | Mean   | ESD    | $T$     | Pow. 5% | Pow. 1% |
|---------------------------------------------------|---------------------------------|-------------------------------------------------|--------|--------|--------|---------|---------|---------|
| $p = 32, q = 1, V_{\text{rel}}(\mathbf{P}) = 0.1$ |                                 |                                                 |        |        |        |         |         |         |
| $N = 4$                                           | 0.3745                          | 0.1211                                          | 0.3560 | 0.3737 | 0.0551 | -1.1234 | 0.4740  | 0.3322  |
| $N = 8$                                           | 0.2108                          | 0.0793                                          | 0.1957 | 0.2087 | 0.0550 | -2.6857 | 0.8568  | 0.8010  |
| $N = 16$                                          | 0.1499                          | 0.0542                                          | 0.1442 | 0.1511 | 0.0463 | 1.8301  | 0.9952  | 0.9878  |
| $N = 32$                                          | 0.1237                          | 0.0377                                          | 0.1203 | 0.1240 | 0.0345 | 0.6352  | 1.0000  | 1.0000  |
| $N = 64$                                          | 0.1115                          | 0.0264                                          | 0.1100 | 0.1117 | 0.0254 | 0.3329  | 1.0000  | 1.0000  |
| $N = 128$                                         | 0.1057                          | 0.0186                                          | 0.1046 | 0.1051 | 0.0184 | -2.2279 | 1.0000  | 1.0000  |
| $N = 256$                                         | 0.1028                          | 0.0131                                          | 0.1019 | 0.1024 | 0.0128 | -2.1683 | 1.0000  | 1.0000  |
| $p = 32, q = 1, V_{\text{rel}}(\mathbf{P}) = 0.2$ |                                 |                                                 |        |        |        |         |         |         |
| $N = 4$                                           | 0.4184                          | 0.1905                                          | 0.3874 | 0.4152 | 0.0870 | -2.5287 | 0.6732  | 0.5566  |
| $N = 8$                                           | 0.2814                          | 0.1247                                          | 0.2661 | 0.2821 | 0.0911 | 0.5770  | 0.9640  | 0.9422  |
| $N = 16$                                          | 0.2350                          | 0.0852                                          | 0.2265 | 0.2329 | 0.0728 | -2.0126 | 0.9996  | 0.9996  |
| $N = 32$                                          | 0.2162                          | 0.0593                                          | 0.2132 | 0.2168 | 0.0560 | 0.7146  | 1.0000  | 1.0000  |
| $N = 64$                                          | 0.2078                          | 0.0416                                          | 0.2069 | 0.2084 | 0.0400 | 1.1078  | 1.0000  | 1.0000  |
| $N = 128$                                         | 0.2038                          | 0.0293                                          | 0.2038 | 0.2044 | 0.0283 | 1.3960  | 1.0000  | 1.0000  |
| $N = 256$                                         | 0.2019                          | 0.0207                                          | 0.2017 | 0.2020 | 0.0202 | 0.4522  | 1.0000  | 1.0000  |
| $p = 32, q = 1, V_{\text{rel}}(\mathbf{P}) = 0.4$ |                                 |                                                 |        |        |        |         |         |         |
| $N = 4$                                           | 0.5158                          | 0.2484                                          | 0.4965 | 0.5174 | 0.1383 | 0.8217  | 0.8696  | 0.8084  |
| $N = 8$                                           | 0.4318                          | 0.1626                                          | 0.4294 | 0.4304 | 0.1324 | -0.7173 | 0.9966  | 0.9946  |
| $N = 16$                                          | 0.4111                          | 0.1111                                          | 0.4124 | 0.4104 | 0.1016 | -0.5116 | 1.0000  | 1.0000  |
| $N = 32$                                          | 0.4046                          | 0.0773                                          | 0.4082 | 0.4056 | 0.0764 | 0.9578  | 1.0000  | 1.0000  |
| $N = 64$                                          | 0.4021                          | 0.0542                                          | 0.4033 | 0.4021 | 0.0533 | 0.0552  | 1.0000  | 1.0000  |
| $N = 128$                                         | 0.4010                          | 0.0382                                          | 0.4021 | 0.4019 | 0.0383 | 1.6504  | 1.0000  | 1.0000  |
| $N = 256$                                         | 0.4005                          | 0.0269                                          | 0.4002 | 0.4002 | 0.0265 | -0.6218 | 1.0000  | 1.0000  |
| $p = 32, q = 1, V_{\text{rel}}(\mathbf{P}) = 0.6$ |                                 |                                                 |        |        |        |         |         |         |
| $N = 4$                                           | 0.6313                          | 0.2264                                          | 0.6504 | 0.6334 | 0.1637 | 0.9116  | 0.9400  | 0.9140  |
| $N = 8$                                           | 0.5973                          | 0.1482                                          | 0.6168 | 0.5978 | 0.1394 | 0.2755  | 1.0000  | 0.9998  |
| $N = 16$                                          | 0.5963                          | 0.1013                                          | 0.6071 | 0.5952 | 0.1026 | -0.7337 | 1.0000  | 1.0000  |
| $N = 32$                                          | 0.5978                          | 0.0704                                          | 0.6041 | 0.5976 | 0.0717 | -0.1040 | 1.0000  | 1.0000  |
| $N = 64$                                          | 0.5988                          | 0.0494                                          | 0.6023 | 0.5994 | 0.0496 | 0.8511  | 1.0000  | 1.0000  |
| $N = 128$                                         | 0.5994                          | 0.0348                                          | 0.5994 | 0.5986 | 0.0349 | -1.5793 | 1.0000  | 1.0000  |
| $N = 256$                                         | 0.5997                          | 0.0246                                          | 0.6006 | 0.5997 | 0.0245 | -0.0753 | 1.0000  | 1.0000  |
| $p = 32, q = 1, V_{\text{rel}}(\mathbf{P}) = 0.8$ |                                 |                                                 |        |        |        |         |         |         |
| $N = 4$                                           | 0.7768                          | 0.1406                                          | 0.8222 | 0.7737 | 0.1558 | -1.3932 | 0.9822  | 0.9742  |
| $N = 8$                                           | 0.7831                          | 0.0921                                          | 0.8099 | 0.7846 | 0.1075 | 0.9636  | 1.0000  | 1.0000  |
| $N = 16$                                          | 0.7918                          | 0.0629                                          | 0.8024 | 0.7906 | 0.0703 | -1.2364 | 1.0000  | 1.0000  |
| $N = 32$                                          | 0.7961                          | 0.0438                                          | 0.8022 | 0.7965 | 0.0458 | 0.6030  | 1.0000  | 1.0000  |
| $N = 64$                                          | 0.7981                          | 0.0307                                          | 0.8001 | 0.7977 | 0.0310 | -0.9765 | 1.0000  | 1.0000  |
| $N = 128$                                         | 0.7991                          | 0.0216                                          | 0.8008 | 0.7995 | 0.0215 | 1.4951  | 1.0000  | 1.0000  |
| $N = 256$                                         | 0.7995                          | 0.0153                                          | 0.7999 | 0.7992 | 0.0154 | -1.2828 | 1.0000  | 1.0000  |

(continued)



**Table S3.** (continued)

|                                                   | $E[V_{\text{rel}}(\mathbf{R})]$ | $\approx \text{SD}[V_{\text{rel}}(\mathbf{R})]$ | Median | Mean   | ESD    | $T$     | Pow. 5% | Pow. 1% |
|---------------------------------------------------|---------------------------------|-------------------------------------------------|--------|--------|--------|---------|---------|---------|
| $p = 32, q = 2, V_{\text{rel}}(\mathbf{P}) = 0.1$ |                                 |                                                 |        |        |        |         |         |         |
| $N = 4$                                           | 0.3759                          | 0.0699                                          | 0.3654 | 0.3756 | 0.0446 | -0.5018 | 0.5744  | 0.3864  |
| $N = 8$                                           | 0.2122                          | 0.0458                                          | 0.2063 | 0.2115 | 0.0385 | -1.2294 | 0.9618  | 0.9252  |
| $N = 16$                                          | 0.1509                          | 0.0313                                          | 0.1477 | 0.1500 | 0.0289 | -2.1212 | 0.9998  | 0.9998  |
| $N = 32$                                          | 0.1243                          | 0.0218                                          | 0.1230 | 0.1241 | 0.0211 | -0.6802 | 1.0000  | 1.0000  |
| $N = 64$                                          | 0.1119                          | 0.0153                                          | 0.1115 | 0.1119 | 0.0150 | 0.3859  | 1.0000  | 1.0000  |
| $N = 128$                                         | 0.1059                          | 0.0107                                          | 0.1056 | 0.1058 | 0.0105 | -0.4723 | 1.0000  | 1.0000  |
| $N = 256$                                         | 0.1029                          | 0.0076                                          | 0.1030 | 0.1030 | 0.0075 | 1.0315  | 1.0000  | 1.0000  |
| $p = 32, q = 2, V_{\text{rel}}(\mathbf{P}) = 0.2$ |                                 |                                                 |        |        |        |         |         |         |
| $N = 4$                                           | 0.4250                          | 0.0881                                          | 0.4112 | 0.4255 | 0.0721 | 0.4438  | 0.8450  | 0.7344  |
| $N = 8$                                           | 0.2877                          | 0.0577                                          | 0.2840 | 0.2892 | 0.0578 | 1.7986  | 0.9992  | 0.9984  |
| $N = 16$                                          | 0.2392                          | 0.0394                                          | 0.2385 | 0.2394 | 0.0402 | 0.3791  | 1.0000  | 1.0000  |
| $N = 32$                                          | 0.2186                          | 0.0274                                          | 0.2183 | 0.2188 | 0.0285 | 0.5549  | 1.0000  | 1.0000  |
| $N = 64$                                          | 0.2091                          | 0.0192                                          | 0.2095 | 0.2094 | 0.0199 | 1.3979  | 1.0000  | 1.0000  |
| $N = 128$                                         | 0.2045                          | 0.0135                                          | 0.2045 | 0.2044 | 0.0136 | -0.3347 | 1.0000  | 1.0000  |
| $N = 256$                                         | 0.2022                          | 0.0096                                          | 0.2022 | 0.2022 | 0.0095 | -0.1785 | 1.0000  | 1.0000  |
| $p = 32, q = 2, V_{\text{rel}}(\mathbf{P}) = 0.4$ |                                 |                                                 |        |        |        |         |         |         |
| $N = 4$                                           | 0.5591                          | 0.0436                                          | 0.5191 | 0.5568 | 0.1217 | -1.3170 | 0.9976  | 0.9924  |
| $N = 8$                                           | 0.4656                          | 0.0285                                          | 0.4458 | 0.4652 | 0.0759 | -0.3893 | 1.0000  | 1.0000  |
| $N = 16$                                          | 0.4306                          | 0.0195                                          | 0.4235 | 0.4311 | 0.0424 | 0.7716  | 1.0000  | 1.0000  |
| $N = 32$                                          | 0.4148                          | 0.0136                                          | 0.4117 | 0.4149 | 0.0238 | 0.1904  | 1.0000  | 1.0000  |
| $N = 64$                                          | 0.4073                          | 0.0095                                          | 0.4065 | 0.4073 | 0.0134 | -0.2999 | 1.0000  | 1.0000  |
| $N = 128$                                         | 0.4036                          | 0.0067                                          | 0.4035 | 0.4037 | 0.0083 | 0.3745  | 1.0000  | 1.0000  |
| $N = 256$                                         | 0.4018                          | 0.0047                                          | 0.4019 | 0.4019 | 0.0053 | 1.3114  | 1.0000  | 1.0000  |
| $p = 32, q = 4, V_{\text{rel}}(\mathbf{P}) = 0.1$ |                                 |                                                 |        |        |        |         |         |         |
| $N = 4$                                           | 0.3797                          | 0.0310                                          | 0.3717 | 0.3802 | 0.0418 | 0.8412  | 0.6484  | 0.4402  |
| $N = 8$                                           | 0.2158                          | 0.0203                                          | 0.2114 | 0.2156 | 0.0293 | -0.4720 | 0.9966  | 0.9904  |
| $N = 16$                                          | 0.1532                          | 0.0139                                          | 0.1517 | 0.1533 | 0.0184 | 0.3585  | 1.0000  | 1.0000  |
| $N = 32$                                          | 0.1256                          | 0.0097                                          | 0.1251 | 0.1255 | 0.0117 | -0.3757 | 1.0000  | 1.0000  |
| $N = 64$                                          | 0.1126                          | 0.0068                                          | 0.1126 | 0.1127 | 0.0076 | 1.0420  | 1.0000  | 1.0000  |
| $N = 128$                                         | 0.1062                          | 0.0048                                          | 0.1063 | 0.1062 | 0.0051 | -0.1750 | 1.0000  | 1.0000  |
| $N = 256$                                         | 0.1031                          | 0.0034                                          | 0.1031 | 0.1031 | 0.0034 | -0.5193 | 1.0000  | 1.0000  |
| $p = 32, q = 4, V_{\text{rel}}(\mathbf{P}) = 0.2$ |                                 |                                                 |        |        |        |         |         |         |
| $N = 4$                                           | 0.4513                          | 0.0104                                          | 0.4391 | 0.4515 | 0.0789 | 0.2035  | 0.9148  | 0.8394  |
| $N = 8$                                           | 0.3073                          | 0.0068                                          | 0.3008 | 0.3073 | 0.0460 | -0.0126 | 1.0000  | 1.0000  |
| $N = 16$                                          | 0.2502                          | 0.0046                                          | 0.2459 | 0.2497 | 0.0246 | -1.3316 | 1.0000  | 1.0000  |
| $N = 32$                                          | 0.2243                          | 0.0032                                          | 0.2220 | 0.2240 | 0.0126 | -1.7985 | 1.0000  | 1.0000  |
| $N = 64$                                          | 0.2120                          | 0.0023                                          | 0.2110 | 0.2118 | 0.0065 | -1.2715 | 1.0000  | 1.0000  |
| $N = 128$                                         | 0.2059                          | 0.0016                                          | 0.2054 | 0.2060 | 0.0036 | 0.2589  | 1.0000  | 1.0000  |
| $N = 256$                                         | 0.2030                          | 0.0011                                          | 0.2028 | 0.2030 | 0.0019 | 0.3123  | 1.0000  | 1.0000  |

(continued)

**Table S3.** (continued)

|                                                   | $E[V_{\text{rel}}(\mathbf{R})]$ | $\approx \text{SD}[V_{\text{rel}}(\mathbf{R})]$ | Median | Mean   | ESD    | $T$     | Pow. 5% | Pow. 1% |
|---------------------------------------------------|---------------------------------|-------------------------------------------------|--------|--------|--------|---------|---------|---------|
| $p = 64, q = 1, V_{\text{rel}}(\mathbf{P}) = 0.1$ |                                 |                                                 |        |        |        |         |         |         |
| $N = 4$                                           | 0.3745                          | 0.1163                                          | 0.3556 | 0.3741 | 0.0519 | -0.5438 | 0.6180  | 0.5168  |
| $N = 8$                                           | 0.2108                          | 0.0762                                          | 0.1968 | 0.2103 | 0.0532 | -0.6481 | 0.9514  | 0.9188  |
| $N = 16$                                          | 0.1499                          | 0.0520                                          | 0.1437 | 0.1497 | 0.0438 | -0.3383 | 0.9998  | 0.9988  |
| $N = 32$                                          | 0.1237                          | 0.0362                                          | 0.1202 | 0.1239 | 0.0334 | 0.4985  | 1.0000  | 1.0000  |
| $N = 64$                                          | 0.1115                          | 0.0254                                          | 0.1098 | 0.1114 | 0.0249 | -0.3128 | 1.0000  | 1.0000  |
| $N = 128$                                         | 0.1057                          | 0.0179                                          | 0.1050 | 0.1057 | 0.0174 | -0.1546 | 1.0000  | 1.0000  |
| $N = 256$                                         | 0.1028                          | 0.0126                                          | 0.1025 | 0.1029 | 0.0126 | 0.5461  | 1.0000  | 1.0000  |
| $p = 64, q = 1, V_{\text{rel}}(\mathbf{P}) = 0.2$ |                                 |                                                 |        |        |        |         |         |         |
| $N = 4$                                           | 0.4184                          | 0.1855                                          | 0.3898 | 0.4192 | 0.0880 | 0.6633  | 0.7800  | 0.7118  |
| $N = 8$                                           | 0.2814                          | 0.1214                                          | 0.2667 | 0.2808 | 0.0868 | -0.4795 | 0.9898  | 0.9808  |
| $N = 16$                                          | 0.2350                          | 0.0829                                          | 0.2309 | 0.2361 | 0.0718 | 1.1428  | 0.9998  | 0.9998  |
| $N = 32$                                          | 0.2162                          | 0.0577                                          | 0.2145 | 0.2169 | 0.0541 | 0.8648  | 1.0000  | 1.0000  |
| $N = 64$                                          | 0.2078                          | 0.0405                                          | 0.2059 | 0.2073 | 0.0391 | -0.9173 | 1.0000  | 1.0000  |
| $N = 128$                                         | 0.2038                          | 0.0285                                          | 0.2026 | 0.2033 | 0.0284 | -1.2701 | 1.0000  | 1.0000  |
| $N = 256$                                         | 0.2019                          | 0.0201                                          | 0.2015 | 0.2020 | 0.0199 | 0.2640  | 1.0000  | 1.0000  |
| $p = 64, q = 1, V_{\text{rel}}(\mathbf{P}) = 0.4$ |                                 |                                                 |        |        |        |         |         |         |
| $N = 4$                                           | 0.5158                          | 0.2442                                          | 0.4971 | 0.5163 | 0.1365 | 0.2233  | 0.9130  | 0.8796  |
| $N = 8$                                           | 0.4318                          | 0.1598                                          | 0.4366 | 0.4332 | 0.1304 | 0.7802  | 0.9978  | 0.9970  |
| $N = 16$                                          | 0.4111                          | 0.1092                                          | 0.4144 | 0.4129 | 0.1015 | 1.2079  | 1.0000  | 1.0000  |
| $N = 32$                                          | 0.4046                          | 0.0760                                          | 0.4052 | 0.4039 | 0.0733 | -0.6457 | 1.0000  | 1.0000  |
| $N = 64$                                          | 0.4021                          | 0.0533                                          | 0.4029 | 0.4021 | 0.0535 | 0.0493  | 1.0000  | 1.0000  |
| $N = 128$                                         | 0.4010                          | 0.0375                                          | 0.4022 | 0.4014 | 0.0373 | 0.8757  | 1.0000  | 1.0000  |
| $N = 256$                                         | 0.4005                          | 0.0265                                          | 0.4009 | 0.4006 | 0.0262 | 0.3899  | 1.0000  | 1.0000  |
| $p = 64, q = 1, V_{\text{rel}}(\mathbf{P}) = 0.6$ |                                 |                                                 |        |        |        |         |         |         |
| $N = 4$                                           | 0.6313                          | 0.2236                                          | 0.6456 | 0.6312 | 0.1616 | -0.0385 | 0.9674  | 0.9538  |
| $N = 8$                                           | 0.5973                          | 0.1464                                          | 0.6171 | 0.5990 | 0.1390 | 0.8570  | 0.9998  | 0.9998  |
| $N = 16$                                          | 0.5963                          | 0.1000                                          | 0.6063 | 0.5966 | 0.1005 | 0.2119  | 1.0000  | 1.0000  |
| $N = 32$                                          | 0.5978                          | 0.0696                                          | 0.6042 | 0.5981 | 0.0705 | 0.2972  | 1.0000  | 1.0000  |
| $N = 64$                                          | 0.5988                          | 0.0488                                          | 0.6020 | 0.5992 | 0.0487 | 0.5630  | 1.0000  | 1.0000  |
| $N = 128$                                         | 0.5994                          | 0.0344                                          | 0.6006 | 0.5993 | 0.0343 | -0.2839 | 1.0000  | 1.0000  |
| $N = 256$                                         | 0.5997                          | 0.0243                                          | 0.6004 | 0.5997 | 0.0242 | 0.1422  | 1.0000  | 1.0000  |
| $p = 64, q = 1, V_{\text{rel}}(\mathbf{P}) = 0.8$ |                                 |                                                 |        |        |        |         |         |         |
| $N = 4$                                           | 0.7768                          | 0.1393                                          | 0.8244 | 0.7723 | 0.1573 | -2.0189 | 0.9896  | 0.9850  |
| $N = 8$                                           | 0.7831                          | 0.0912                                          | 0.8098 | 0.7841 | 0.1083 | 0.6205  | 1.0000  | 1.0000  |
| $N = 16$                                          | 0.7918                          | 0.0623                                          | 0.8046 | 0.7928 | 0.0687 | 0.9579  | 1.0000  | 1.0000  |
| $N = 32$                                          | 0.7961                          | 0.0433                                          | 0.8009 | 0.7955 | 0.0452 | -0.9741 | 1.0000  | 1.0000  |
| $N = 64$                                          | 0.7981                          | 0.0304                                          | 0.8012 | 0.7983 | 0.0309 | 0.4419  | 1.0000  | 1.0000  |
| $N = 128$                                         | 0.7991                          | 0.0214                                          | 0.8010 | 0.7996 | 0.0217 | 1.7584  | 1.0000  | 1.0000  |
| $N = 256$                                         | 0.7995                          | 0.0151                                          | 0.8004 | 0.7995 | 0.0153 | -0.3298 | 1.0000  | 1.0000  |

(continued)

**Table S3.** (continued)

|                                                   | $E[V_{\text{rel}}(\mathbf{R})]$ | $\approx \text{SD}[V_{\text{rel}}(\mathbf{R})]$ | Median | Mean   | ESD    | $T$     | Pow. 5% | Pow. 1% |
|---------------------------------------------------|---------------------------------|-------------------------------------------------|--------|--------|--------|---------|---------|---------|
| $p = 64, q = 2, V_{\text{rel}}(\mathbf{P}) = 0.1$ |                                 |                                                 |        |        |        |         |         |         |
| $N = 4$                                           | 0.3759                          | 0.0669                                          | 0.3657 | 0.3763 | 0.0404 | 0.7925  | 0.7720  | 0.6518  |
| $N = 8$                                           | 0.2122                          | 0.0438                                          | 0.2069 | 0.2121 | 0.0364 | -0.0292 | 0.9936  | 0.9878  |
| $N = 16$                                          | 0.1509                          | 0.0299                                          | 0.1487 | 0.1511 | 0.0280 | 0.6190  | 1.0000  | 1.0000  |
| $N = 32$                                          | 0.1242                          | 0.0208                                          | 0.1233 | 0.1241 | 0.0204 | -0.4629 | 1.0000  | 1.0000  |
| $N = 64$                                          | 0.1118                          | 0.0146                                          | 0.1114 | 0.1118 | 0.0142 | -0.0792 | 1.0000  | 1.0000  |
| $N = 128$                                         | 0.1059                          | 0.0103                                          | 0.1058 | 0.1060 | 0.0102 | 0.8201  | 1.0000  | 1.0000  |
| $N = 256$                                         | 0.1029                          | 0.0073                                          | 0.1029 | 0.1029 | 0.0072 | 0.1922  | 1.0000  | 1.0000  |
| $p = 64, q = 2, V_{\text{rel}}(\mathbf{P}) = 0.2$ |                                 |                                                 |        |        |        |         |         |         |
| $N = 4$                                           | 0.4248                          | 0.0866                                          | 0.4108 | 0.4247 | 0.0675 | -0.0638 | 0.9378  | 0.8990  |
| $N = 8$                                           | 0.2875                          | 0.0567                                          | 0.2828 | 0.2886 | 0.0558 | 1.4147  | 1.0000  | 1.0000  |
| $N = 16$                                          | 0.2390                          | 0.0387                                          | 0.2379 | 0.2389 | 0.0400 | -0.2156 | 1.0000  | 1.0000  |
| $N = 32$                                          | 0.2185                          | 0.0269                                          | 0.2184 | 0.2186 | 0.0277 | 0.3109  | 1.0000  | 1.0000  |
| $N = 64$                                          | 0.2090                          | 0.0189                                          | 0.2090 | 0.2087 | 0.0189 | -1.1574 | 1.0000  | 1.0000  |
| $N = 128$                                         | 0.2045                          | 0.0133                                          | 0.2045 | 0.2046 | 0.0135 | 0.7096  | 1.0000  | 1.0000  |
| $N = 256$                                         | 0.2022                          | 0.0094                                          | 0.2024 | 0.2021 | 0.0095 | -0.4674 | 1.0000  | 1.0000  |
| $p = 64, q = 2, V_{\text{rel}}(\mathbf{P}) = 0.4$ |                                 |                                                 |        |        |        |         |         |         |
| $N = 4$                                           | 0.5570                          | 0.0463                                          | 0.5220 | 0.5603 | 0.1204 | 1.9801  | 0.9990  | 0.9984  |
| $N = 8$                                           | 0.4643                          | 0.0303                                          | 0.4463 | 0.4627 | 0.0728 | -1.5320 | 1.0000  | 1.0000  |
| $N = 16$                                          | 0.4299                          | 0.0207                                          | 0.4241 | 0.4308 | 0.0405 | 1.6245  | 1.0000  | 1.0000  |
| $N = 32$                                          | 0.4145                          | 0.0144                                          | 0.4121 | 0.4149 | 0.0237 | 1.1474  | 1.0000  | 1.0000  |
| $N = 64$                                          | 0.4071                          | 0.0101                                          | 0.4063 | 0.4070 | 0.0137 | -0.7212 | 1.0000  | 1.0000  |
| $N = 128$                                         | 0.4035                          | 0.0071                                          | 0.4032 | 0.4035 | 0.0084 | -0.6864 | 1.0000  | 1.0000  |
| $N = 256$                                         | 0.4018                          | 0.0050                                          | 0.4016 | 0.4017 | 0.0056 | -0.8478 | 1.0000  | 1.0000  |
| $p = 64, q = 4, V_{\text{rel}}(\mathbf{P}) = 0.1$ |                                 |                                                 |        |        |        |         |         |         |
| $N = 4$                                           | 0.3793                          | 0.0307                                          | 0.3714 | 0.3788 | 0.0354 | -0.9303 | 0.8442  | 0.7356  |
| $N = 8$                                           | 0.2154                          | 0.0201                                          | 0.2121 | 0.2150 | 0.0257 | -0.9970 | 1.0000  | 1.0000  |
| $N = 16$                                          | 0.1530                          | 0.0137                                          | 0.1517 | 0.1529 | 0.0170 | -0.3265 | 1.0000  | 1.0000  |
| $N = 32$                                          | 0.1255                          | 0.0095                                          | 0.1249 | 0.1255 | 0.0111 | 0.0425  | 1.0000  | 1.0000  |
| $N = 64$                                          | 0.1125                          | 0.0067                                          | 0.1125 | 0.1126 | 0.0074 | 0.9617  | 1.0000  | 1.0000  |
| $N = 128$                                         | 0.1062                          | 0.0047                                          | 0.1062 | 0.1061 | 0.0050 | -1.1861 | 1.0000  | 1.0000  |
| $N = 256$                                         | 0.1031                          | 0.0033                                          | 0.1031 | 0.1031 | 0.0034 | 0.4460  | 1.0000  | 1.0000  |
| $p = 64, q = 4, V_{\text{rel}}(\mathbf{P}) = 0.2$ |                                 |                                                 |        |        |        |         |         |         |
| $N = 4$                                           | 0.4473                          | 0.0142                                          | 0.4362 | 0.4472 | 0.0703 | -0.0188 | 0.9738  | 0.9562  |
| $N = 8$                                           | 0.3049                          | 0.0093                                          | 0.2990 | 0.3053 | 0.0440 | 0.6636  | 1.0000  | 1.0000  |
| $N = 16$                                          | 0.2490                          | 0.0063                                          | 0.2455 | 0.2488 | 0.0231 | -0.5385 | 1.0000  | 1.0000  |
| $N = 32$                                          | 0.2237                          | 0.0044                                          | 0.2222 | 0.2237 | 0.0124 | 0.1394  | 1.0000  | 1.0000  |
| $N = 64$                                          | 0.2117                          | 0.0031                                          | 0.2108 | 0.2117 | 0.0067 | 0.4724  | 1.0000  | 1.0000  |
| $N = 128$                                         | 0.2058                          | 0.0022                                          | 0.2056 | 0.2058 | 0.0037 | 0.7531  | 1.0000  | 1.0000  |
| $N = 256$                                         | 0.2029                          | 0.0015                                          | 0.2028 | 0.2029 | 0.0021 | -0.1420 | 1.0000  | 1.0000  |

(continued)

**Table S3.** (continued)

|                                                    | $E[V_{\text{rel}}(\mathbf{R})]$ | $\approx \text{SD}[V_{\text{rel}}(\mathbf{R})]$ | Median | Mean   | ESD    | $T$     | Pow. 5% | Pow. 1% |
|----------------------------------------------------|---------------------------------|-------------------------------------------------|--------|--------|--------|---------|---------|---------|
| $p = 128, q = 1, V_{\text{rel}}(\mathbf{P}) = 0.1$ |                                 |                                                 |        |        |        |         |         |         |
| $N = 4$                                            | 0.3745                          | 0.1140                                          | 0.3554 | 0.3736 | 0.0496 | -1.3663 | 0.7384  | 0.6688  |
| $N = 8$                                            | 0.2108                          | 0.0746                                          | 0.1999 | 0.2121 | 0.0532 | 1.7827  | 0.9838  | 0.9758  |
| $N = 16$                                           | 0.1499                          | 0.0510                                          | 0.1440 | 0.1502 | 0.0432 | 0.5427  | 1.0000  | 1.0000  |
| $N = 32$                                           | 0.1237                          | 0.0355                                          | 0.1216 | 0.1242 | 0.0325 | 1.1239  | 1.0000  | 1.0000  |
| $N = 64$                                           | 0.1115                          | 0.0249                                          | 0.1095 | 0.1111 | 0.0240 | -1.2279 | 1.0000  | 1.0000  |
| $N = 128$                                          | 0.1057                          | 0.0175                                          | 0.1045 | 0.1054 | 0.0172 | -1.0755 | 1.0000  | 1.0000  |
| $N = 256$                                          | 0.1028                          | 0.0124                                          | 0.1027 | 0.1028 | 0.0122 | -0.1024 | 1.0000  | 1.0000  |
| $p = 128, q = 1, V_{\text{rel}}(\mathbf{P}) = 0.2$ |                                 |                                                 |        |        |        |         |         |         |
| $N = 4$                                            | 0.4184                          | 0.1830                                          | 0.3917 | 0.4178 | 0.0829 | -0.5103 | 0.8690  | 0.8286  |
| $N = 8$                                            | 0.2814                          | 0.1198                                          | 0.2677 | 0.2831 | 0.0873 | 1.4148  | 0.9962  | 0.9950  |
| $N = 16$                                           | 0.2350                          | 0.0818                                          | 0.2291 | 0.2352 | 0.0723 | 0.2642  | 1.0000  | 1.0000  |
| $N = 32$                                           | 0.2162                          | 0.0569                                          | 0.2138 | 0.2164 | 0.0530 | 0.2451  | 1.0000  | 1.0000  |
| $N = 64$                                           | 0.2078                          | 0.0399                                          | 0.2071 | 0.2081 | 0.0383 | 0.5487  | 1.0000  | 1.0000  |
| $N = 128$                                          | 0.2038                          | 0.0281                                          | 0.2035 | 0.2045 | 0.0278 | 1.7509  | 1.0000  | 1.0000  |
| $N = 256$                                          | 0.2019                          | 0.0198                                          | 0.2014 | 0.2018 | 0.0197 | -0.4400 | 1.0000  | 1.0000  |
| $p = 128, q = 1, V_{\text{rel}}(\mathbf{P}) = 0.4$ |                                 |                                                 |        |        |        |         |         |         |
| $N = 4$                                            | 0.5158                          | 0.2421                                          | 0.4971 | 0.5166 | 0.1339 | 0.4348  | 0.9574  | 0.9414  |
| $N = 8$                                            | 0.4318                          | 0.1585                                          | 0.4334 | 0.4314 | 0.1291 | -0.2045 | 0.9996  | 0.9996  |
| $N = 16$                                           | 0.4111                          | 0.1083                                          | 0.4105 | 0.4082 | 0.0999 | -2.0899 | 1.0000  | 1.0000  |
| $N = 32$                                           | 0.4046                          | 0.0753                                          | 0.4064 | 0.4055 | 0.0722 | 0.9047  | 1.0000  | 1.0000  |
| $N = 64$                                           | 0.4021                          | 0.0528                                          | 0.4013 | 0.4019 | 0.0518 | -0.2472 | 1.0000  | 1.0000  |
| $N = 128$                                          | 0.4010                          | 0.0372                                          | 0.4018 | 0.4007 | 0.0373 | -0.5842 | 1.0000  | 1.0000  |
| $N = 256$                                          | 0.4005                          | 0.0263                                          | 0.4014 | 0.4012 | 0.0259 | 2.0216  | 1.0000  | 1.0000  |
| $p = 128, q = 1, V_{\text{rel}}(\mathbf{P}) = 0.6$ |                                 |                                                 |        |        |        |         |         |         |
| $N = 4$                                            | 0.6313                          | 0.2222                                          | 0.6428 | 0.6302 | 0.1624 | -0.4981 | 0.9826  | 0.9758  |
| $N = 8$                                            | 0.5973                          | 0.1455                                          | 0.6166 | 0.5969 | 0.1405 | -0.1875 | 1.0000  | 1.0000  |
| $N = 16$                                           | 0.5963                          | 0.0994                                          | 0.6073 | 0.5965 | 0.0993 | 0.1776  | 1.0000  | 1.0000  |
| $N = 32$                                           | 0.5978                          | 0.0691                                          | 0.6027 | 0.5975 | 0.0708 | -0.2100 | 1.0000  | 1.0000  |
| $N = 64$                                           | 0.5988                          | 0.0485                                          | 0.6024 | 0.5991 | 0.0489 | 0.4259  | 1.0000  | 1.0000  |
| $N = 128$                                          | 0.5994                          | 0.0342                                          | 0.6012 | 0.5997 | 0.0340 | 0.6170  | 1.0000  | 1.0000  |
| $N = 256$                                          | 0.5997                          | 0.0241                                          | 0.6005 | 0.5996 | 0.0242 | -0.2387 | 1.0000  | 1.0000  |
| $p = 128, q = 1, V_{\text{rel}}(\mathbf{P}) = 0.8$ |                                 |                                                 |        |        |        |         |         |         |
| $N = 4$                                            | 0.7768                          | 0.1386                                          | 0.8248 | 0.7760 | 0.1528 | -0.3781 | 0.9942  | 0.9918  |
| $N = 8$                                            | 0.7831                          | 0.0907                                          | 0.8035 | 0.7804 | 0.1076 | -1.8237 | 1.0000  | 1.0000  |
| $N = 16$                                           | 0.7918                          | 0.0620                                          | 0.8028 | 0.7905 | 0.0683 | -1.4145 | 1.0000  | 1.0000  |
| $N = 32$                                           | 0.7961                          | 0.0431                                          | 0.8009 | 0.7957 | 0.0453 | -0.5783 | 1.0000  | 1.0000  |
| $N = 64$                                           | 0.7981                          | 0.0302                                          | 0.8012 | 0.7985 | 0.0313 | 1.0163  | 1.0000  | 1.0000  |
| $N = 128$                                          | 0.7991                          | 0.0213                                          | 0.8006 | 0.7994 | 0.0215 | 0.9895  | 1.0000  | 1.0000  |
| $N = 256$                                          | 0.7995                          | 0.0150                                          | 0.7999 | 0.7991 | 0.0152 | -1.8261 | 1.0000  | 1.0000  |

(continued)

**Table S3.** (continued)

|                                                    | $E[V_{\text{rel}}(\mathbf{R})]$ | $\approx \text{SD}[V_{\text{rel}}(\mathbf{R})]$ | Median | Mean   | ESD    | $T$     | Pow. 5% | Pow. 1% |
|----------------------------------------------------|---------------------------------|-------------------------------------------------|--------|--------|--------|---------|---------|---------|
| $p = 128, q = 2, V_{\text{rel}}(\mathbf{P}) = 0.1$ |                                 |                                                 |        |        |        |         |         |         |
| $N = 4$                                            | 0.3759                          | 0.0654                                          | 0.3662 | 0.3749 | 0.0366 | -1.8246 | 0.8902  | 0.8370  |
| $N = 8$                                            | 0.2121                          | 0.0428                                          | 0.2074 | 0.2125 | 0.0350 | 0.6874  | 0.9988  | 0.9984  |
| $N = 16$                                           | 0.1508                          | 0.0292                                          | 0.1483 | 0.1505 | 0.0264 | -0.7843 | 1.0000  | 1.0000  |
| $N = 32$                                           | 0.1242                          | 0.0203                                          | 0.1230 | 0.1238 | 0.0193 | -1.7367 | 1.0000  | 1.0000  |
| $N = 64$                                           | 0.1118                          | 0.0143                                          | 0.1117 | 0.1121 | 0.0140 | 1.3424  | 1.0000  | 1.0000  |
| $N = 128$                                          | 0.1059                          | 0.0100                                          | 0.1057 | 0.1060 | 0.0100 | 0.8314  | 1.0000  | 1.0000  |
| $N = 256$                                          | 0.1029                          | 0.0071                                          | 0.1027 | 0.1029 | 0.0070 | 0.2004  | 1.0000  | 1.0000  |
| $p = 128, q = 2, V_{\text{rel}}(\mathbf{P}) = 0.2$ |                                 |                                                 |        |        |        |         |         |         |
| $N = 4$                                            | 0.4247                          | 0.0857                                          | 0.4087 | 0.4234 | 0.0644 | -1.3764 | 0.9832  | 0.9696  |
| $N = 8$                                            | 0.2874                          | 0.0561                                          | 0.2826 | 0.2883 | 0.0544 | 1.0797  | 1.0000  | 1.0000  |
| $N = 16$                                           | 0.2390                          | 0.0383                                          | 0.2370 | 0.2386 | 0.0398 | -0.6199 | 1.0000  | 1.0000  |
| $N = 32$                                           | 0.2185                          | 0.0267                                          | 0.2179 | 0.2185 | 0.0267 | 0.0300  | 1.0000  | 1.0000  |
| $N = 64$                                           | 0.2090                          | 0.0187                                          | 0.2091 | 0.2089 | 0.0192 | -0.4189 | 1.0000  | 1.0000  |
| $N = 128$                                          | 0.2044                          | 0.0132                                          | 0.2044 | 0.2044 | 0.0134 | -0.1665 | 1.0000  | 1.0000  |
| $N = 256$                                          | 0.2022                          | 0.0093                                          | 0.2023 | 0.2022 | 0.0094 | -0.1209 | 1.0000  | 1.0000  |
| $p = 128, q = 2, V_{\text{rel}}(\mathbf{P}) = 0.4$ |                                 |                                                 |        |        |        |         |         |         |
| $N = 4$                                            | 0.5560                          | 0.0476                                          | 0.5211 | 0.5574 | 0.1170 | 0.8814  | 0.9994  | 0.9992  |
| $N = 8$                                            | 0.4636                          | 0.0312                                          | 0.4472 | 0.4638 | 0.0740 | 0.1420  | 1.0000  | 1.0000  |
| $N = 16$                                           | 0.4296                          | 0.0213                                          | 0.4233 | 0.4293 | 0.0415 | -0.4751 | 1.0000  | 1.0000  |
| $N = 32$                                           | 0.4143                          | 0.0148                                          | 0.4124 | 0.4144 | 0.0236 | 0.3334  | 1.0000  | 1.0000  |
| $N = 64$                                           | 0.4071                          | 0.0104                                          | 0.4066 | 0.4072 | 0.0137 | 0.5258  | 1.0000  | 1.0000  |
| $N = 128$                                          | 0.4035                          | 0.0073                                          | 0.4033 | 0.4034 | 0.0087 | -0.5183 | 1.0000  | 1.0000  |
| $N = 256$                                          | 0.4017                          | 0.0052                                          | 0.4018 | 0.4018 | 0.0056 | 0.8376  | 1.0000  | 1.0000  |
| $p = 128, q = 4, V_{\text{rel}}(\mathbf{P}) = 0.1$ |                                 |                                                 |        |        |        |         |         |         |
| $N = 4$                                            | 0.3791                          | 0.0304                                          | 0.3725 | 0.3793 | 0.0325 | 0.3717  | 0.9568  | 0.9226  |
| $N = 8$                                            | 0.2152                          | 0.0199                                          | 0.2116 | 0.2148 | 0.0250 | -1.2699 | 1.0000  | 1.0000  |
| $N = 16$                                           | 0.1529                          | 0.0136                                          | 0.1519 | 0.1531 | 0.0164 | 0.8764  | 1.0000  | 1.0000  |
| $N = 32$                                           | 0.1254                          | 0.0095                                          | 0.1249 | 0.1253 | 0.0107 | -0.4537 | 1.0000  | 1.0000  |
| $N = 64$                                           | 0.1125                          | 0.0066                                          | 0.1123 | 0.1124 | 0.0072 | -0.9179 | 1.0000  | 1.0000  |
| $N = 128$                                          | 0.1062                          | 0.0047                                          | 0.1062 | 0.1061 | 0.0048 | -0.4628 | 1.0000  | 1.0000  |
| $N = 256$                                          | 0.1031                          | 0.0033                                          | 0.1030 | 0.1030 | 0.0034 | -1.6580 | 1.0000  | 1.0000  |
| $p = 128, q = 4, V_{\text{rel}}(\mathbf{P}) = 0.2$ |                                 |                                                 |        |        |        |         |         |         |
| $N = 4$                                            | 0.4456                          | 0.0158                                          | 0.4326 | 0.4435 | 0.0656 | -2.3155 | 0.9932  | 0.9874  |
| $N = 8$                                            | 0.3039                          | 0.0103                                          | 0.2988 | 0.3042 | 0.0415 | 0.5443  | 1.0000  | 1.0000  |
| $N = 16$                                           | 0.2485                          | 0.0071                                          | 0.2455 | 0.2486 | 0.0225 | 0.4644  | 1.0000  | 1.0000  |
| $N = 32$                                           | 0.2235                          | 0.0049                                          | 0.2217 | 0.2234 | 0.0122 | -0.4670 | 1.0000  | 1.0000  |
| $N = 64$                                           | 0.2115                          | 0.0034                                          | 0.2108 | 0.2115 | 0.0066 | -1.0065 | 1.0000  | 1.0000  |
| $N = 128$                                          | 0.2057                          | 0.0024                                          | 0.2056 | 0.2058 | 0.0037 | 0.4702  | 1.0000  | 1.0000  |
| $N = 256$                                          | 0.2029                          | 0.0017                                          | 0.2028 | 0.2028 | 0.0022 | -0.1830 | 1.0000  | 1.0000  |

(continued)

**Table S3.** (continued)

|                                                    | $E[V_{\text{rel}}(\mathbf{R})]$ | $\approx \text{SD}[V_{\text{rel}}(\mathbf{R})]$ | Median | Mean   | ESD    | $T$     | Pow. 5% | Pow. 1% |
|----------------------------------------------------|---------------------------------|-------------------------------------------------|--------|--------|--------|---------|---------|---------|
| $p = 256, q = 1, V_{\text{rel}}(\mathbf{P}) = 0.1$ |                                 |                                                 |        |        |        |         |         |         |
| $N = 4$                                            | 0.3745                          | 0.1128                                          | 0.3559 | 0.3741 | 0.0484 | -0.6148 | 0.8268  | 0.7730  |
| $N = 8$                                            | 0.2108                          | 0.0739                                          | 0.1966 | 0.2094 | 0.0510 | -1.8791 | 0.9940  | 0.9892  |
| $N = 16$                                           | 0.1499                          | 0.0505                                          | 0.1435 | 0.1495 | 0.0415 | -0.7639 | 1.0000  | 1.0000  |
| $N = 32$                                           | 0.1237                          | 0.0351                                          | 0.1196 | 0.1227 | 0.0318 | -2.2709 | 1.0000  | 1.0000  |
| $N = 64$                                           | 0.1115                          | 0.0246                                          | 0.1101 | 0.1116 | 0.0234 | 0.2559  | 1.0000  | 1.0000  |
| $N = 128$                                          | 0.1057                          | 0.0173                                          | 0.1051 | 0.1057 | 0.0169 | -0.0901 | 1.0000  | 1.0000  |
| $N = 256$                                          | 0.1028                          | 0.0122                                          | 0.1022 | 0.1028 | 0.0122 | -0.3173 | 1.0000  | 1.0000  |
| $p = 256, q = 1, V_{\text{rel}}(\mathbf{P}) = 0.2$ |                                 |                                                 |        |        |        |         |         |         |
| $N = 4$                                            | 0.4184                          | 0.1818                                          | 0.3913 | 0.4174 | 0.0825 | -0.8586 | 0.9208  | 0.8878  |
| $N = 8$                                            | 0.2814                          | 0.1190                                          | 0.2651 | 0.2802 | 0.0856 | -0.9368 | 0.9996  | 0.9994  |
| $N = 16$                                           | 0.2350                          | 0.0813                                          | 0.2284 | 0.2351 | 0.0702 | 0.1706  | 1.0000  | 1.0000  |
| $N = 32$                                           | 0.2162                          | 0.0565                                          | 0.2128 | 0.2155 | 0.0527 | -0.8742 | 1.0000  | 1.0000  |
| $N = 64$                                           | 0.2078                          | 0.0397                                          | 0.2074 | 0.2079 | 0.0392 | 0.2748  | 1.0000  | 1.0000  |
| $N = 128$                                          | 0.2038                          | 0.0279                                          | 0.2041 | 0.2044 | 0.0272 | 1.4626  | 1.0000  | 1.0000  |
| $N = 256$                                          | 0.2019                          | 0.0197                                          | 0.2015 | 0.2020 | 0.0195 | 0.5562  | 1.0000  | 1.0000  |
| $p = 256, q = 1, V_{\text{rel}}(\mathbf{P}) = 0.4$ |                                 |                                                 |        |        |        |         |         |         |
| $N = 4$                                            | 0.5158                          | 0.2411                                          | 0.4975 | 0.5148 | 0.1320 | -0.5622 | 0.9706  | 0.9582  |
| $N = 8$                                            | 0.4318                          | 0.1578                                          | 0.4348 | 0.4343 | 0.1278 | 1.3865  | 1.0000  | 1.0000  |
| $N = 16$                                           | 0.4111                          | 0.1078                                          | 0.4118 | 0.4091 | 0.0995 | -1.4526 | 1.0000  | 1.0000  |
| $N = 32$                                           | 0.4046                          | 0.0750                                          | 0.4078 | 0.4052 | 0.0726 | 0.5664  | 1.0000  | 1.0000  |
| $N = 64$                                           | 0.4021                          | 0.0526                                          | 0.4033 | 0.4024 | 0.0522 | 0.4500  | 1.0000  | 1.0000  |
| $N = 128$                                          | 0.4010                          | 0.0371                                          | 0.3999 | 0.4004 | 0.0366 | -1.0479 | 1.0000  | 1.0000  |
| $N = 256$                                          | 0.4005                          | 0.0262                                          | 0.4011 | 0.4007 | 0.0260 | 0.6241  | 1.0000  | 1.0000  |
| $p = 256, q = 1, V_{\text{rel}}(\mathbf{P}) = 0.6$ |                                 |                                                 |        |        |        |         |         |         |
| $N = 4$                                            | 0.6313                          | 0.2215                                          | 0.6451 | 0.6291 | 0.1586 | -0.9820 | 0.9896  | 0.9844  |
| $N = 8$                                            | 0.5973                          | 0.1450                                          | 0.6166 | 0.5992 | 0.1353 | 0.9907  | 1.0000  | 1.0000  |
| $N = 16$                                           | 0.5963                          | 0.0991                                          | 0.6059 | 0.5966 | 0.0983 | 0.2590  | 1.0000  | 1.0000  |
| $N = 32$                                           | 0.5978                          | 0.0689                                          | 0.6044 | 0.5988 | 0.0696 | 1.0898  | 1.0000  | 1.0000  |
| $N = 64$                                           | 0.5988                          | 0.0483                                          | 0.6006 | 0.5977 | 0.0487 | -1.5654 | 1.0000  | 1.0000  |
| $N = 128$                                          | 0.5994                          | 0.0340                                          | 0.6009 | 0.5993 | 0.0344 | -0.2590 | 1.0000  | 1.0000  |
| $N = 256$                                          | 0.5997                          | 0.0240                                          | 0.6003 | 0.5997 | 0.0241 | 0.0156  | 1.0000  | 1.0000  |
| $p = 256, q = 1, V_{\text{rel}}(\mathbf{P}) = 0.8$ |                                 |                                                 |        |        |        |         |         |         |
| $N = 4$                                            | 0.7768                          | 0.1383                                          | 0.8208 | 0.7728 | 0.1551 | -1.8239 | 0.9960  | 0.9946  |
| $N = 8$                                            | 0.7831                          | 0.0905                                          | 0.8098 | 0.7857 | 0.1056 | 1.7052  | 1.0000  | 1.0000  |
| $N = 16$                                           | 0.7918                          | 0.0618                                          | 0.8031 | 0.7915 | 0.0681 | -0.3408 | 1.0000  | 1.0000  |
| $N = 32$                                           | 0.7961                          | 0.0430                                          | 0.8022 | 0.7963 | 0.0460 | 0.3738  | 1.0000  | 1.0000  |
| $N = 64$                                           | 0.7981                          | 0.0302                                          | 0.8004 | 0.7977 | 0.0305 | -0.9565 | 1.0000  | 1.0000  |
| $N = 128$                                          | 0.7991                          | 0.0212                                          | 0.8007 | 0.7993 | 0.0212 | 0.6642  | 1.0000  | 1.0000  |
| $N = 256$                                          | 0.7995                          | 0.0150                                          | 0.8002 | 0.7996 | 0.0153 | 0.4570  | 1.0000  | 1.0000  |

(continued)

**Table S3.** (continued)

|                                                    | $E[V_{\text{rel}}(\mathbf{R})]$ | $\approx \text{SD}[V_{\text{rel}}(\mathbf{R})]$ | Median | Mean   | ESD    | $T$     | Pow. 5% | Pow. 1% |
|----------------------------------------------------|---------------------------------|-------------------------------------------------|--------|--------|--------|---------|---------|---------|
| $p = 256, q = 2, V_{\text{rel}}(\mathbf{P}) = 0.1$ |                                 |                                                 |        |        |        |         |         |         |
| $N = 4$                                            | 0.3759                          | 0.0646                                          | 0.3667 | 0.3751 | 0.0357 | -1.4520 | 0.9512  | 0.9198  |
| $N = 8$                                            | 0.2121                          | 0.0423                                          | 0.2078 | 0.2126 | 0.0340 | 0.9840  | 1.0000  | 1.0000  |
| $N = 16$                                           | 0.1508                          | 0.0289                                          | 0.1483 | 0.1500 | 0.0263 | -2.1534 | 1.0000  | 1.0000  |
| $N = 32$                                           | 0.1242                          | 0.0201                                          | 0.1229 | 0.1239 | 0.0189 | -1.1190 | 1.0000  | 1.0000  |
| $N = 64$                                           | 0.1118                          | 0.0141                                          | 0.1113 | 0.1119 | 0.0139 | 0.1824  | 1.0000  | 1.0000  |
| $N = 128$                                          | 0.1058                          | 0.0099                                          | 0.1055 | 0.1057 | 0.0099 | -0.9821 | 1.0000  | 1.0000  |
| $N = 256$                                          | 0.1029                          | 0.0070                                          | 0.1030 | 0.1031 | 0.0071 | 1.5009  | 1.0000  | 1.0000  |
| $p = 256, q = 2, V_{\text{rel}}(\mathbf{P}) = 0.2$ |                                 |                                                 |        |        |        |         |         |         |
| $N = 4$                                            | 0.4246                          | 0.0853                                          | 0.4108 | 0.4236 | 0.0622 | -1.1437 | 0.9914  | 0.9872  |
| $N = 8$                                            | 0.2874                          | 0.0558                                          | 0.2829 | 0.2871 | 0.0534 | -0.3519 | 1.0000  | 1.0000  |
| $N = 16$                                           | 0.2389                          | 0.0382                                          | 0.2382 | 0.2388 | 0.0385 | -0.2851 | 1.0000  | 1.0000  |
| $N = 32$                                           | 0.2184                          | 0.0265                                          | 0.2181 | 0.2180 | 0.0270 | -1.1649 | 1.0000  | 1.0000  |
| $N = 64$                                           | 0.2090                          | 0.0186                                          | 0.2090 | 0.2088 | 0.0189 | -0.6108 | 1.0000  | 1.0000  |
| $N = 128$                                          | 0.2044                          | 0.0131                                          | 0.2045 | 0.2046 | 0.0131 | 1.0852  | 1.0000  | 1.0000  |
| $N = 256$                                          | 0.2022                          | 0.0093                                          | 0.2023 | 0.2021 | 0.0092 | -0.5046 | 1.0000  | 1.0000  |
| $p = 256, q = 2, V_{\text{rel}}(\mathbf{P}) = 0.4$ |                                 |                                                 |        |        |        |         |         |         |
| $N = 4$                                            | 0.5555                          | 0.0482                                          | 0.5217 | 0.5576 | 0.1141 | 1.2655  | 0.9996  | 0.9996  |
| $N = 8$                                            | 0.4633                          | 0.0315                                          | 0.4466 | 0.4616 | 0.0721 | -1.6268 | 1.0000  | 1.0000  |
| $N = 16$                                           | 0.4294                          | 0.0215                                          | 0.4244 | 0.4307 | 0.0414 | 2.1603  | 1.0000  | 1.0000  |
| $N = 32$                                           | 0.4142                          | 0.0150                                          | 0.4130 | 0.4146 | 0.0231 | 1.2190  | 1.0000  | 1.0000  |
| $N = 64$                                           | 0.4070                          | 0.0105                                          | 0.4064 | 0.4069 | 0.0137 | -0.8165 | 1.0000  | 1.0000  |
| $N = 128$                                          | 0.4035                          | 0.0074                                          | 0.4034 | 0.4034 | 0.0088 | -1.0027 | 1.0000  | 1.0000  |
| $N = 256$                                          | 0.4017                          | 0.0052                                          | 0.4019 | 0.4018 | 0.0058 | 0.4936  | 1.0000  | 1.0000  |
| $p = 256, q = 4, V_{\text{rel}}(\mathbf{P}) = 0.1$ |                                 |                                                 |        |        |        |         |         |         |
| $N = 4$                                            | 0.3790                          | 0.0302                                          | 0.3724 | 0.3791 | 0.0312 | 0.1148  | 0.9894  | 0.9778  |
| $N = 8$                                            | 0.2152                          | 0.0198                                          | 0.2118 | 0.2148 | 0.0236 | -1.1456 | 1.0000  | 1.0000  |
| $N = 16$                                           | 0.1528                          | 0.0135                                          | 0.1515 | 0.1525 | 0.0157 | -1.3028 | 1.0000  | 1.0000  |
| $N = 32$                                           | 0.1254                          | 0.0094                                          | 0.1246 | 0.1252 | 0.0105 | -0.9418 | 1.0000  | 1.0000  |
| $N = 64$                                           | 0.1124                          | 0.0066                                          | 0.1125 | 0.1125 | 0.0071 | 1.0205  | 1.0000  | 1.0000  |
| $N = 128$                                          | 0.1062                          | 0.0046                                          | 0.1062 | 0.1062 | 0.0048 | -0.0593 | 1.0000  | 1.0000  |
| $N = 256$                                          | 0.1031                          | 0.0033                                          | 0.1031 | 0.1031 | 0.0033 | 1.2325  | 1.0000  | 1.0000  |
| $p = 256, q = 4, V_{\text{rel}}(\mathbf{P}) = 0.2$ |                                 |                                                 |        |        |        |         |         |         |
| $N = 4$                                            | 0.4449                          | 0.0165                                          | 0.4348 | 0.4454 | 0.0668 | 0.5683  | 0.9978  | 0.9972  |
| $N = 8$                                            | 0.3034                          | 0.0108                                          | 0.2979 | 0.3032 | 0.0401 | -0.3479 | 1.0000  | 1.0000  |
| $N = 16$                                           | 0.2482                          | 0.0074                                          | 0.2452 | 0.2483 | 0.0223 | 0.2351  | 1.0000  | 1.0000  |
| $N = 32$                                           | 0.2233                          | 0.0051                                          | 0.2217 | 0.2234 | 0.0122 | 0.4341  | 1.0000  | 1.0000  |
| $N = 64$                                           | 0.2115                          | 0.0036                                          | 0.2108 | 0.2115 | 0.0065 | 0.0211  | 1.0000  | 1.0000  |
| $N = 128$                                          | 0.2057                          | 0.0025                                          | 0.2055 | 0.2057 | 0.0039 | 0.8353  | 1.0000  | 1.0000  |
| $N = 256$                                          | 0.2028                          | 0.0018                                          | 0.2028 | 0.2028 | 0.0022 | 0.1085  | 1.0000  | 1.0000  |

(continued)

**Table S3.** (continued)

|                                                     | $E[V_{\text{rel}}(\mathbf{R})]$ | $\approx \text{SD}[V_{\text{rel}}(\mathbf{R})]$ | Median | Mean   | ESD    | $T$     | Pow. 5% | Pow. 1% |
|-----------------------------------------------------|---------------------------------|-------------------------------------------------|--------|--------|--------|---------|---------|---------|
| $p = 1024, q = 1, V_{\text{rel}}(\mathbf{P}) = 0.1$ |                                 |                                                 |        |        |        |         |         |         |
| $N = 4$                                             | 0.3745                          | 0.1119                                          | 0.3575 | 0.3740 | 0.0464 | -0.8598 | 0.9402  | 0.9184  |
| $N = 8$                                             | 0.2108                          | 0.0733                                          | 0.1994 | 0.2114 | 0.0517 | 0.8268  | 0.9992  | 0.9988  |
| $N = 16$                                            | 0.1499                          | 0.0501                                          | 0.1440 | 0.1498 | 0.0421 | -0.1942 | 1.0000  | 1.0000  |
| $N = 32$                                            | 0.1237                          | 0.0348                                          | 0.1195 | 0.1232 | 0.0317 | -1.1238 | 1.0000  | 1.0000  |
| $N = 64$                                            | 0.1115                          | 0.0244                                          | 0.1100 | 0.1116 | 0.0235 | 0.0669  | 1.0000  | 1.0000  |
| $N = 128$                                           | 0.1057                          | 0.0172                                          | 0.1046 | 0.1053 | 0.0167 | -1.4923 | 1.0000  | 1.0000  |
| $N = 256$                                           | 0.1028                          | 0.0121                                          | 0.1022 | 0.1027 | 0.0120 | -1.0207 | 1.0000  | 1.0000  |
| $p = 1024, q = 1, V_{\text{rel}}(\mathbf{P}) = 0.2$ |                                 |                                                 |        |        |        |         |         |         |
| $N = 4$                                             | 0.4184                          | 0.1808                                          | 0.3901 | 0.4175 | 0.0832 | -0.7299 | 0.9720  | 0.9636  |
| $N = 8$                                             | 0.2814                          | 0.1184                                          | 0.2681 | 0.2808 | 0.0852 | -0.4595 | 1.0000  | 1.0000  |
| $N = 16$                                            | 0.2350                          | 0.0809                                          | 0.2314 | 0.2361 | 0.0695 | 1.1295  | 1.0000  | 1.0000  |
| $N = 32$                                            | 0.2162                          | 0.0563                                          | 0.2130 | 0.2156 | 0.0525 | -0.8736 | 1.0000  | 1.0000  |
| $N = 64$                                            | 0.2078                          | 0.0395                                          | 0.2072 | 0.2083 | 0.0384 | 0.9543  | 1.0000  | 1.0000  |
| $N = 128$                                           | 0.2038                          | 0.0278                                          | 0.2026 | 0.2030 | 0.0273 | -2.2022 | 1.0000  | 1.0000  |
| $N = 256$                                           | 0.2019                          | 0.0196                                          | 0.2010 | 0.2013 | 0.0193 | -2.1799 | 1.0000  | 1.0000  |
| $p = 1024, q = 1, V_{\text{rel}}(\mathbf{P}) = 0.4$ |                                 |                                                 |        |        |        |         |         |         |
| $N = 4$                                             | 0.5158                          | 0.2403                                          | 0.4926 | 0.5118 | 0.1306 | -2.1637 | 0.9890  | 0.9848  |
| $N = 8$                                             | 0.4318                          | 0.1573                                          | 0.4266 | 0.4286 | 0.1287 | -1.7550 | 1.0000  | 1.0000  |
| $N = 16$                                            | 0.4111                          | 0.1075                                          | 0.4127 | 0.4111 | 0.1008 | -0.0454 | 1.0000  | 1.0000  |
| $N = 32$                                            | 0.4046                          | 0.0748                                          | 0.4072 | 0.4055 | 0.0726 | 0.8769  | 1.0000  | 1.0000  |
| $N = 64$                                            | 0.4021                          | 0.0524                                          | 0.4035 | 0.4024 | 0.0524 | 0.4578  | 1.0000  | 1.0000  |
| $N = 128$                                           | 0.4010                          | 0.0369                                          | 0.4006 | 0.4007 | 0.0367 | -0.5419 | 1.0000  | 1.0000  |
| $N = 256$                                           | 0.4005                          | 0.0261                                          | 0.4015 | 0.4007 | 0.0263 | 0.6336  | 1.0000  | 1.0000  |
| $p = 1024, q = 1, V_{\text{rel}}(\mathbf{P}) = 0.6$ |                                 |                                                 |        |        |        |         |         |         |
| $N = 4$                                             | 0.6313                          | 0.2210                                          | 0.6412 | 0.6285 | 0.1592 | -1.2475 | 0.9946  | 0.9932  |
| $N = 8$                                             | 0.5973                          | 0.1447                                          | 0.6157 | 0.5975 | 0.1355 | 0.1026  | 1.0000  | 1.0000  |
| $N = 16$                                            | 0.5963                          | 0.0988                                          | 0.6088 | 0.5965 | 0.0979 | 0.1669  | 1.0000  | 1.0000  |
| $N = 32$                                            | 0.5978                          | 0.0688                                          | 0.6035 | 0.5971 | 0.0703 | -0.6285 | 1.0000  | 1.0000  |
| $N = 64$                                            | 0.5988                          | 0.0482                                          | 0.6019 | 0.5985 | 0.0479 | -0.4679 | 1.0000  | 1.0000  |
| $N = 128$                                           | 0.5994                          | 0.0340                                          | 0.6006 | 0.5996 | 0.0335 | 0.3479  | 1.0000  | 1.0000  |
| $N = 256$                                           | 0.5997                          | 0.0240                                          | 0.6002 | 0.5995 | 0.0240 | -0.4863 | 1.0000  | 1.0000  |
| $p = 1024, q = 1, V_{\text{rel}}(\mathbf{P}) = 0.8$ |                                 |                                                 |        |        |        |         |         |         |
| $N = 4$                                             | 0.7768                          | 0.1380                                          | 0.8236 | 0.7733 | 0.1543 | -1.5756 | 0.9986  | 0.9980  |
| $N = 8$                                             | 0.7831                          | 0.0903                                          | 0.8088 | 0.7830 | 0.1074 | -0.0831 | 1.0000  | 1.0000  |
| $N = 16$                                            | 0.7918                          | 0.0617                                          | 0.8057 | 0.7930 | 0.0683 | 1.2443  | 1.0000  | 1.0000  |
| $N = 32$                                            | 0.7961                          | 0.0429                                          | 0.8014 | 0.7954 | 0.0454 | -0.9758 | 1.0000  | 1.0000  |
| $N = 64$                                            | 0.7981                          | 0.0301                                          | 0.8006 | 0.7981 | 0.0308 | 0.0710  | 1.0000  | 1.0000  |
| $N = 128$                                           | 0.7991                          | 0.0212                                          | 0.8006 | 0.7988 | 0.0220 | -0.7670 | 1.0000  | 1.0000  |
| $N = 256$                                           | 0.7995                          | 0.0150                                          | 0.7994 | 0.7989 | 0.0154 | -2.7764 | 1.0000  | 1.0000  |

(continued)



**Table S3.** (continued)

|                                                     | $E[V_{\text{rel}}(\mathbf{R})]$ | $\approx \text{SD}[V_{\text{rel}}(\mathbf{R})]$ | Median | Mean   | ESD    | $T$     | Pow. 5% | Pow. 1% |
|-----------------------------------------------------|---------------------------------|-------------------------------------------------|--------|--------|--------|---------|---------|---------|
| $p = 1024, q = 2, V_{\text{rel}}(\mathbf{P}) = 0.1$ |                                 |                                                 |        |        |        |         |         |         |
| $N = 4$                                             | 0.3759                          | 0.0640                                          | 0.3678 | 0.3762 | 0.0350 | 0.7678  | 0.9934  | 0.9886  |
| $N = 8$                                             | 0.2121                          | 0.0419                                          | 0.2076 | 0.2116 | 0.0327 | -1.0455 | 1.0000  | 1.0000  |
| $N = 16$                                            | 0.1508                          | 0.0286                                          | 0.1485 | 0.1505 | 0.0259 | -0.8294 | 1.0000  | 1.0000  |
| $N = 32$                                            | 0.1242                          | 0.0199                                          | 0.1231 | 0.1241 | 0.0192 | -0.5213 | 1.0000  | 1.0000  |
| $N = 64$                                            | 0.1118                          | 0.0140                                          | 0.1119 | 0.1121 | 0.0138 | 1.5748  | 1.0000  | 1.0000  |
| $N = 128$                                           | 0.1058                          | 0.0098                                          | 0.1058 | 0.1059 | 0.0096 | 0.5372  | 1.0000  | 1.0000  |
| $N = 256$                                           | 0.1029                          | 0.0069                                          | 0.1027 | 0.1029 | 0.0069 | 0.0563  | 1.0000  | 1.0000  |
| $p = 1024, q = 2, V_{\text{rel}}(\mathbf{P}) = 0.2$ |                                 |                                                 |        |        |        |         |         |         |
| $N = 4$                                             | 0.4246                          | 0.0850                                          | 0.4104 | 0.4236 | 0.0623 | -1.1057 | 0.9990  | 0.9986  |
| $N = 8$                                             | 0.2873                          | 0.0556                                          | 0.2833 | 0.2877 | 0.0534 | 0.4989  | 1.0000  | 1.0000  |
| $N = 16$                                            | 0.2389                          | 0.0380                                          | 0.2370 | 0.2384 | 0.0382 | -0.9306 | 1.0000  | 1.0000  |
| $N = 32$                                            | 0.2184                          | 0.0264                                          | 0.2186 | 0.2186 | 0.0271 | 0.4335  | 1.0000  | 1.0000  |
| $N = 64$                                            | 0.2090                          | 0.0185                                          | 0.2086 | 0.2087 | 0.0186 | -1.0366 | 1.0000  | 1.0000  |
| $N = 128$                                           | 0.2044                          | 0.0131                                          | 0.2048 | 0.2044 | 0.0130 | -0.1240 | 1.0000  | 1.0000  |
| $N = 256$                                           | 0.2022                          | 0.0092                                          | 0.2025 | 0.2023 | 0.0092 | 0.9339  | 1.0000  | 1.0000  |
| $p = 1024, q = 2, V_{\text{rel}}(\mathbf{P}) = 0.4$ |                                 |                                                 |        |        |        |         |         |         |
| $N = 4$                                             | 0.5552                          | 0.0486                                          | 0.5181 | 0.5524 | 0.1116 | -1.7454 | 1.0000  | 1.0000  |
| $N = 8$                                             | 0.4631                          | 0.0318                                          | 0.4460 | 0.4617 | 0.0722 | -1.3874 | 1.0000  | 1.0000  |
| $N = 16$                                            | 0.4293                          | 0.0217                                          | 0.4240 | 0.4295 | 0.0407 | 0.3579  | 1.0000  | 1.0000  |
| $N = 32$                                            | 0.4142                          | 0.0151                                          | 0.4120 | 0.4141 | 0.0240 | -0.1373 | 1.0000  | 1.0000  |
| $N = 64$                                            | 0.4070                          | 0.0106                                          | 0.4064 | 0.4070 | 0.0137 | 0.2280  | 1.0000  | 1.0000  |
| $N = 128$                                           | 0.4035                          | 0.0075                                          | 0.4038 | 0.4037 | 0.0087 | 2.2263  | 1.0000  | 1.0000  |
| $N = 256$                                           | 0.4017                          | 0.0053                                          | 0.4017 | 0.4017 | 0.0057 | 0.1438  | 1.0000  | 1.0000  |
| $p = 1024, q = 4, V_{\text{rel}}(\mathbf{P}) = 0.1$ |                                 |                                                 |        |        |        |         |         |         |
| $N = 4$                                             | 0.3790                          | 0.0301                                          | 0.3724 | 0.3792 | 0.0307 | 0.4532  | 0.9996  | 0.9994  |
| $N = 8$                                             | 0.2151                          | 0.0197                                          | 0.2122 | 0.2155 | 0.0237 | 1.1716  | 1.0000  | 1.0000  |
| $N = 16$                                            | 0.1528                          | 0.0134                                          | 0.1515 | 0.1528 | 0.0159 | -0.0284 | 1.0000  | 1.0000  |
| $N = 32$                                            | 0.1253                          | 0.0094                                          | 0.1248 | 0.1251 | 0.0106 | -1.6034 | 1.0000  | 1.0000  |
| $N = 64$                                            | 0.1124                          | 0.0066                                          | 0.1123 | 0.1123 | 0.0070 | -1.7393 | 1.0000  | 1.0000  |
| $N = 128$                                           | 0.1062                          | 0.0046                                          | 0.1061 | 0.1062 | 0.0048 | 0.4660  | 1.0000  | 1.0000  |
| $N = 256$                                           | 0.1031                          | 0.0033                                          | 0.1031 | 0.1031 | 0.0033 | 0.1723  | 1.0000  | 1.0000  |
| $p = 1024, q = 4, V_{\text{rel}}(\mathbf{P}) = 0.2$ |                                 |                                                 |        |        |        |         |         |         |
| $N = 4$                                             | 0.4444                          | 0.0171                                          | 0.4343 | 0.4457 | 0.0657 | 1.4518  | 1.0000  | 1.0000  |
| $N = 8$                                             | 0.3030                          | 0.0112                                          | 0.2979 | 0.3037 | 0.0405 | 1.2073  | 1.0000  | 1.0000  |
| $N = 16$                                            | 0.2480                          | 0.0076                                          | 0.2455 | 0.2486 | 0.0220 | 1.7390  | 1.0000  | 1.0000  |
| $N = 32$                                            | 0.2232                          | 0.0053                                          | 0.2220 | 0.2234 | 0.0120 | 0.8155  | 1.0000  | 1.0000  |
| $N = 64$                                            | 0.2114                          | 0.0037                                          | 0.2109 | 0.2114 | 0.0065 | -0.6746 | 1.0000  | 1.0000  |
| $N = 128$                                           | 0.2057                          | 0.0026                                          | 0.2054 | 0.2056 | 0.0038 | -1.4728 | 1.0000  | 1.0000  |
| $N = 256$                                           | 0.2028                          | 0.0019                                          | 0.2028 | 0.2028 | 0.0023 | -0.1714 | 1.0000  | 1.0000  |

(continued)

**Table S3.** (continued)

|                                                                                    | $E[V_{\text{rel}}(\mathbf{R})]$ | $\approx \text{SD}[V_{\text{rel}}(\mathbf{R})]$ | Median | Mean   | ESD    | $T$     | Pow. 5% | Pow. 1% |
|------------------------------------------------------------------------------------|---------------------------------|-------------------------------------------------|--------|--------|--------|---------|---------|---------|
| $p = 2$ , linearly decreasing $\lambda$ ( $V_{\text{rel}}(\mathbf{P}) = 0.1111$ )  |                                 |                                                 |        |        |        |         |         |         |
| $N = 4$                                                                            | 0.3793                          | 0.3103                                          | 0.3202 | 0.3782 | 0.3087 | -0.2446 | 0.0640  | 0.0134  |
| $N = 8$                                                                            | 0.2185                          | 0.2096                                          | 0.1575 | 0.2187 | 0.2095 | 0.0654  | 0.1256  | 0.0354  |
| $N = 16$                                                                           | 0.1593                          | 0.1461                                          | 0.1207 | 0.1601 | 0.1476 | 0.4067  | 0.2536  | 0.0924  |
| $N = 32$                                                                           | 0.1339                          | 0.1035                                          | 0.1163 | 0.1362 | 0.1048 | 1.5246  | 0.4890  | 0.2662  |
| $N = 64$                                                                           | 0.1222                          | 0.0736                                          | 0.1139 | 0.1227 | 0.0740 | 0.4641  | 0.7850  | 0.6022  |
| $N = 128$                                                                          | 0.1166                          | 0.0522                                          | 0.1128 | 0.1173 | 0.0534 | 0.8838  | 0.9780  | 0.9248  |
| $N = 256$                                                                          | 0.1138                          | 0.0370                                          | 0.1115 | 0.1136 | 0.0369 | -0.3938 | 0.9998  | 0.9986  |
| $p = 4$ , linearly decreasing $\lambda$ ( $V_{\text{rel}}(\mathbf{P}) = 0.0667$ )  |                                 |                                                 |        |        |        |         |         |         |
| $N = 4$                                                                            | 0.3607                          | 0.1023                                          | 0.3405 | 0.3602 | 0.1328 | -0.2992 | 0.0808  | 0.0214  |
| $N = 8$                                                                            | 0.1881                          | 0.0670                                          | 0.1769 | 0.1876 | 0.0810 | -0.4529 | 0.1366  | 0.0428  |
| $N = 16$                                                                           | 0.1221                          | 0.0458                                          | 0.1145 | 0.1217 | 0.0511 | -0.5361 | 0.3872  | 0.1528  |
| $N = 32$                                                                           | 0.0932                          | 0.0318                                          | 0.0878 | 0.0925 | 0.0344 | -1.5091 | 0.8004  | 0.5156  |
| $N = 64$                                                                           | 0.0796                          | 0.0223                                          | 0.0777 | 0.0801 | 0.0229 | 1.2955  | 0.9956  | 0.9664  |
| $N = 128$                                                                          | 0.0731                          | 0.0157                                          | 0.0717 | 0.0729 | 0.0160 | -0.6557 | 1.0000  | 1.0000  |
| $N = 256$                                                                          | 0.0699                          | 0.0111                                          | 0.0696 | 0.0702 | 0.0111 | 1.9461  | 1.0000  | 1.0000  |
| $p = 8$ , linearly decreasing $\lambda$ ( $V_{\text{rel}}(\mathbf{P}) = 0.0370$ )  |                                 |                                                 |        |        |        |         |         |         |
| $N = 4$                                                                            | 0.3485                          | 0.0338                                          | 0.3374 | 0.3479 | 0.0631 | -0.7111 | 0.0804  | 0.0214  |
| $N = 8$                                                                            | 0.1679                          | 0.0221                                          | 0.1630 | 0.1672 | 0.0378 | -1.4542 | 0.1808  | 0.0612  |
| $N = 16$                                                                           | 0.0974                          | 0.0151                                          | 0.0946 | 0.0971 | 0.0219 | -1.1963 | 0.4982  | 0.2516  |
| $N = 32$                                                                           | 0.0661                          | 0.0105                                          | 0.0650 | 0.0664 | 0.0136 | 1.4437  | 0.9468  | 0.8070  |
| $N = 64$                                                                           | 0.0513                          | 0.0074                                          | 0.0506 | 0.0513 | 0.0084 | 0.3549  | 1.0000  | 0.9998  |
| $N = 128$                                                                          | 0.0441                          | 0.0052                                          | 0.0437 | 0.0440 | 0.0055 | -1.0232 | 1.0000  | 1.0000  |
| $N = 256$                                                                          | 0.0405                          | 0.0037                                          | 0.0404 | 0.0406 | 0.0038 | 1.1287  | 1.0000  | 1.0000  |
| $p = 16$ , linearly decreasing $\lambda$ ( $V_{\text{rel}}(\mathbf{P}) = 0.0196$ ) |                                 |                                                 |        |        |        |         |         |         |
| $N = 4$                                                                            | 0.3415                          | 0.0115                                          | 0.3360 | 0.3417 | 0.0318 | 0.4905  | 0.0956  | 0.0280  |
| $N = 8$                                                                            | 0.1563                          | 0.0075                                          | 0.1542 | 0.1564 | 0.0185 | 0.4621  | 0.2146  | 0.0758  |
| $N = 16$                                                                           | 0.0831                          | 0.0052                                          | 0.0823 | 0.0832 | 0.0103 | 0.9491  | 0.5530  | 0.2952  |
| $N = 32$                                                                           | 0.0502                          | 0.0036                                          | 0.0498 | 0.0503 | 0.0060 | 0.5576  | 0.9854  | 0.9070  |
| $N = 64$                                                                           | 0.0347                          | 0.0025                                          | 0.0345 | 0.0346 | 0.0035 | -0.3910 | 1.0000  | 1.0000  |
| $N = 128$                                                                          | 0.0271                          | 0.0018                                          | 0.0270 | 0.0271 | 0.0021 | -0.2154 | 1.0000  | 1.0000  |
| $N = 256$                                                                          | 0.0233                          | 0.0012                                          | 0.0233 | 0.0233 | 0.0014 | -0.0289 | 1.0000  | 1.0000  |
| $p = 32$ , linearly decreasing $\lambda$ ( $V_{\text{rel}}(\mathbf{P}) = 0.0101$ ) |                                 |                                                 |        |        |        |         |         |         |
| $N = 4$                                                                            | 0.3375                          | 0.0040                                          | 0.3343 | 0.3376 | 0.0157 | 0.3965  | 0.0998  | 0.0242  |
| $N = 8$                                                                            | 0.1497                          | 0.0026                                          | 0.1487 | 0.1496 | 0.0091 | -1.2013 | 0.2206  | 0.0844  |
| $N = 16$                                                                           | 0.0751                          | 0.0018                                          | 0.0747 | 0.0750 | 0.0050 | -0.9852 | 0.6218  | 0.3566  |
| $N = 32$                                                                           | 0.0415                          | 0.0012                                          | 0.0414 | 0.0415 | 0.0027 | -0.4252 | 0.9896  | 0.9576  |
| $N = 64$                                                                           | 0.0255                          | 0.0009                                          | 0.0255 | 0.0255 | 0.0015 | 0.1871  | 1.0000  | 1.0000  |
| $N = 128$                                                                          | 0.0178                          | 0.0006                                          | 0.0177 | 0.0178 | 0.0009 | 0.9912  | 1.0000  | 1.0000  |
| $N = 256$                                                                          | 0.0139                          | 0.0004                                          | 0.0139 | 0.0139 | 0.0005 | -0.3046 | 1.0000  | 1.0000  |

(continued)

**Table S3.** (continued)

|                                                                                      | $E[V_{\text{rel}}(\mathbf{R})]$ | $\approx \text{SD}[V_{\text{rel}}(\mathbf{R})]$ | Median | Mean   | ESD     | $T$     | Pow. 5% | Pow. 1% |
|--------------------------------------------------------------------------------------|---------------------------------|-------------------------------------------------|--------|--------|---------|---------|---------|---------|
| $p = 64$ , linearly decreasing $\lambda$ ( $V_{\text{rel}}(\mathbf{P}) = 0.0051$ )   |                                 |                                                 |        |        |         |         |         |         |
| $N = 4$                                                                              | 0.3355                          | 0.00140                                         | 0.3341 | 0.3356 | 0.00789 | 0.7901  | 0.0940  | 0.0272  |
| $N = 8$                                                                              | 0.1464                          | 0.00092                                         | 0.1459 | 0.1464 | 0.00466 | -0.4444 | 0.2506  | 0.0858  |
| $N = 16$                                                                             | 0.0710                          | 0.00063                                         | 0.0708 | 0.0709 | 0.00247 | -1.4701 | 0.6356  | 0.3802  |
| $N = 32$                                                                             | 0.0370                          | 0.00044                                         | 0.0369 | 0.0370 | 0.00132 | 0.6883  | 0.9942  | 0.9640  |
| $N = 64$                                                                             | 0.0208                          | 0.00031                                         | 0.0208 | 0.0208 | 0.00070 | 1.0001  | 1.0000  | 1.0000  |
| $N = 128$                                                                            | 0.0129                          | 0.00022                                         | 0.0129 | 0.0129 | 0.00038 | -1.1839 | 1.0000  | 1.0000  |
| $N = 256$                                                                            | 0.0090                          | 0.00015                                         | 0.0090 | 0.0090 | 0.00022 | -2.0294 | 1.0000  | 1.0000  |
| $p = 128$ , linearly decreasing $\lambda$ ( $V_{\text{rel}}(\mathbf{P}) = 0.0026$ )  |                                 |                                                 |        |        |         |         |         |         |
| $N = 4$                                                                              | 0.3344                          | 0.00049                                         | 0.3335 | 0.3343 | 0.00396 | -1.2815 | 0.1000  | 0.0318  |
| $N = 8$                                                                              | 0.1446                          | 0.00032                                         | 0.1445 | 0.1447 | 0.00231 | 0.6599  | 0.2520  | 0.0992  |
| $N = 16$                                                                             | 0.0688                          | 0.00022                                         | 0.0688 | 0.0688 | 0.00124 | -1.3645 | 0.6396  | 0.3790  |
| $N = 32$                                                                             | 0.0346                          | 0.00015                                         | 0.0346 | 0.0346 | 0.00065 | -0.4754 | 0.9924  | 0.9744  |
| $N = 64$                                                                             | 0.0183                          | 0.00011                                         | 0.0183 | 0.0183 | 0.00033 | -0.2605 | 1.0000  | 1.0000  |
| $N = 128$                                                                            | 0.0104                          | 0.00008                                         | 0.0104 | 0.0104 | 0.00018 | 0.5676  | 1.0000  | 1.0000  |
| $N = 256$                                                                            | 0.0065                          | 0.00005                                         | 0.0065 | 0.0065 | 0.00010 | 2.0255  | 1.0000  | 1.0000  |
| $p = 256$ , linearly decreasing $\lambda$ ( $V_{\text{rel}}(\mathbf{P}) = 0.0013$ )  |                                 |                                                 |        |        |         |         |         |         |
| $N = 4$                                                                              | 0.3339                          | 0.00017                                         | 0.3334 | 0.3338 | 0.00197 | -1.4148 | 0.0930  | 0.0230  |
| $N = 8$                                                                              | 0.1438                          | 0.00011                                         | 0.1437 | 0.1438 | 0.00117 | 0.7633  | 0.2498  | 0.0956  |
| $N = 16$                                                                             | 0.0678                          | 0.00008                                         | 0.0677 | 0.0678 | 0.00062 | 2.7597  | 0.6702  | 0.4300  |
| $N = 32$                                                                             | 0.0334                          | 0.00005                                         | 0.0334 | 0.0334 | 0.00032 | -0.4550 | 0.9962  | 0.9750  |
| $N = 64$                                                                             | 0.0171                          | 0.00004                                         | 0.0171 | 0.0171 | 0.00016 | 0.6150  | 1.0000  | 1.0000  |
| $N = 128$                                                                            | 0.0091                          | 0.00003                                         | 0.0091 | 0.0091 | 0.00009 | 0.2258  | 1.0000  | 1.0000  |
| $N = 256$                                                                            | 0.0052                          | 0.00002                                         | 0.0052 | 0.0052 | 0.00004 | -0.0664 | 1.0000  | 1.0000  |
| $p = 1024$ , linearly decreasing $\lambda$ ( $V_{\text{rel}}(\mathbf{P}) = 0.0003$ ) |                                 |                                                 |        |        |         |         |         |         |
| $N = 4$                                                                              | 0.3335                          | 0.00002                                         | 0.3334 | 0.3335 | 0.00049 | 0.6559  | 0.0972  | 0.0288  |
| $N = 8$                                                                              | 0.1431                          | 0.00001                                         | 0.1431 | 0.1431 | 0.00029 | -0.0088 | 0.2516  | 0.0904  |
| $N = 16$                                                                             | 0.0669                          | 0.00001                                         | 0.0669 | 0.0669 | 0.00016 | -0.5107 | 0.6618  | 0.4206  |
| $N = 32$                                                                             | 0.0326                          | 0.00001                                         | 0.0326 | 0.0326 | 0.00008 | 1.3157  | 0.9974  | 0.9772  |
| $N = 64$                                                                             | 0.0162                          | 0.00000                                         | 0.0162 | 0.0162 | 0.00004 | -0.9976 | 1.0000  | 1.0000  |
| $N = 128$                                                                            | 0.0082                          | 0.00000                                         | 0.0082 | 0.0082 | 0.00002 | -0.8058 | 1.0000  | 1.0000  |
| $N = 256$                                                                            | 0.0042                          | 0.00000                                         | 0.0042 | 0.0042 | 0.00001 | 0.4128  | 1.0000  | 1.0000  |

(continued)

**Table S3.** (continued)

|                                                                                         | $E[V_{\text{rel}}(\mathbf{R})]$ | $\approx \text{SD}[V_{\text{rel}}(\mathbf{R})]$ | Median | Mean   | ESD    | $T$     | Pow. 5% | Pow. 1% |
|-----------------------------------------------------------------------------------------|---------------------------------|-------------------------------------------------|--------|--------|--------|---------|---------|---------|
| $p = 2$ , quadratically decreasing $\lambda$ ( $V_{\text{rel}}(\mathbf{P}) = 0.3600$ )  |                                 |                                                 |        |        |        |         |         |         |
| $N = 4$                                                                                 | 0.4951                          | 0.3210                                          | 0.5073 | 0.4913 | 0.3196 | -0.8490 | 0.1268  | 0.0234  |
| $N = 8$                                                                                 | 0.4006                          | 0.2490                                          | 0.3987 | 0.3998 | 0.2514 | -0.2231 | 0.3764  | 0.1568  |
| $N = 16$                                                                                | 0.3752                          | 0.1848                                          | 0.3766 | 0.3740 | 0.1853 | -0.4712 | 0.7346  | 0.4780  |
| $N = 32$                                                                                | 0.3665                          | 0.1335                                          | 0.3654 | 0.3654 | 0.1326 | -0.6016 | 0.9654  | 0.8998  |
| $N = 64$                                                                                | 0.3630                          | 0.0952                                          | 0.3640 | 0.3637 | 0.0954 | 0.4645  | 1.0000  | 0.9978  |
| $N = 128$                                                                               | 0.3615                          | 0.0676                                          | 0.3612 | 0.3622 | 0.0675 | 0.7336  | 1.0000  | 1.0000  |
| $N = 256$                                                                               | 0.3607                          | 0.0479                                          | 0.3615 | 0.3603 | 0.0482 | -0.5713 | 1.0000  | 1.0000  |
| $p = 4$ , quadratically decreasing $\lambda$ ( $V_{\text{rel}}(\mathbf{P}) = 0.1911$ )  |                                 |                                                 |        |        |        |         |         |         |
| $N = 4$                                                                                 | 0.4160                          | 0.1703                                          | 0.3858 | 0.4156 | 0.1516 | -0.1564 | 0.1596  | 0.0568  |
| $N = 8$                                                                                 | 0.2766                          | 0.1115                                          | 0.2647 | 0.2764 | 0.1019 | -0.1091 | 0.4706  | 0.2268  |
| $N = 16$                                                                                | 0.2284                          | 0.0762                                          | 0.2182 | 0.2269 | 0.0722 | -1.4661 | 0.9412  | 0.7528  |
| $N = 32$                                                                                | 0.2085                          | 0.0530                                          | 0.2054 | 0.2086 | 0.0524 | 0.1041  | 1.0000  | 0.9992  |
| $N = 64$                                                                                | 0.1995                          | 0.0372                                          | 0.1969 | 0.1991 | 0.0367 | -0.8045 | 1.0000  | 1.0000  |
| $N = 128$                                                                               | 0.1953                          | 0.0262                                          | 0.1942 | 0.1954 | 0.0261 | 0.3599  | 1.0000  | 1.0000  |
| $N = 256$                                                                               | 0.1932                          | 0.0185                                          | 0.1928 | 0.1931 | 0.0182 | -0.2212 | 1.0000  | 1.0000  |
| $p = 8$ , quadratically decreasing $\lambda$ ( $V_{\text{rel}}(\mathbf{P}) = 0.0980$ )  |                                 |                                                 |        |        |        |         |         |         |
| $N = 4$                                                                                 | 0.3757                          | 0.0545                                          | 0.3645 | 0.3773 | 0.0786 | 1.4665  | 0.1776  | 0.0600  |
| $N = 8$                                                                                 | 0.2114                          | 0.0357                                          | 0.2056 | 0.2111 | 0.0468 | -0.3972 | 0.5748  | 0.3076  |
| $N = 16$                                                                                | 0.1496                          | 0.0244                                          | 0.1462 | 0.1493 | 0.0289 | -0.8012 | 0.9890  | 0.9326  |
| $N = 32$                                                                                | 0.1227                          | 0.0169                                          | 0.1213 | 0.1226 | 0.0188 | -0.3686 | 1.0000  | 1.0000  |
| $N = 64$                                                                                | 0.1101                          | 0.0119                                          | 0.1094 | 0.1100 | 0.0126 | -0.5086 | 1.0000  | 1.0000  |
| $N = 128$                                                                               | 0.1040                          | 0.0084                                          | 0.1038 | 0.1040 | 0.0086 | -0.2554 | 1.0000  | 1.0000  |
| $N = 256$                                                                               | 0.1010                          | 0.0059                                          | 0.1008 | 0.1010 | 0.0060 | 0.4807  | 1.0000  | 1.0000  |
| $p = 16$ , quadratically decreasing $\lambda$ ( $V_{\text{rel}}(\mathbf{P}) = 0.0496$ ) |                                 |                                                 |        |        |        |         |         |         |
| $N = 4$                                                                                 | 0.3560                          | 0.0200                                          | 0.3485 | 0.3558 | 0.0395 | -0.3027 | 0.2010  | 0.0854  |
| $N = 8$                                                                                 | 0.1786                          | 0.0131                                          | 0.1757 | 0.1785 | 0.0244 | -0.2391 | 0.6058  | 0.3646  |
| $N = 16$                                                                                | 0.1092                          | 0.0089                                          | 0.1079 | 0.1092 | 0.0144 | -0.0334 | 0.9916  | 0.9524  |
| $N = 32$                                                                                | 0.0783                          | 0.0062                                          | 0.0777 | 0.0783 | 0.0084 | -0.2148 | 1.0000  | 1.0000  |
| $N = 64$                                                                                | 0.0637                          | 0.0044                                          | 0.0634 | 0.0637 | 0.0052 | -0.0525 | 1.0000  | 1.0000  |
| $N = 128$                                                                               | 0.0565                          | 0.0031                                          | 0.0564 | 0.0565 | 0.0034 | -0.8445 | 1.0000  | 1.0000  |
| $N = 256$                                                                               | 0.0530                          | 0.0022                                          | 0.0530 | 0.0531 | 0.0023 | 1.9474  | 1.0000  | 1.0000  |
| $p = 32$ , quadratically decreasing $\lambda$ ( $V_{\text{rel}}(\mathbf{P}) = 0.0249$ ) |                                 |                                                 |        |        |        |         |         |         |
| $N = 4$                                                                                 | 0.3444                          | 0.0071                                          | 0.3400 | 0.3443 | 0.0204 | -0.1348 | 0.2064  | 0.0736  |
| $N = 8$                                                                                 | 0.1605                          | 0.0047                                          | 0.1591 | 0.1605 | 0.0123 | -0.2153 | 0.5998  | 0.3796  |
| $N = 16$                                                                                | 0.0879                          | 0.0032                                          | 0.0873 | 0.0877 | 0.0068 | -1.3347 | 0.9948  | 0.9652  |
| $N = 32$                                                                                | 0.0553                          | 0.0022                                          | 0.0551 | 0.0554 | 0.0038 | 1.4091  | 1.0000  | 1.0000  |
| $N = 64$                                                                                | 0.0398                          | 0.0016                                          | 0.0397 | 0.0398 | 0.0022 | -0.7987 | 1.0000  | 1.0000  |
| $N = 128$                                                                               | 0.0323                          | 0.0011                                          | 0.0323 | 0.0323 | 0.0014 | 0.6379  | 1.0000  | 1.0000  |
| $N = 256$                                                                               | 0.0286                          | 0.0008                                          | 0.0286 | 0.0286 | 0.0009 | 1.7252  | 1.0000  | 1.0000  |

(continued)

**Table S3.** (continued)

|                                                                                           | $E[V_{\text{rel}}(\mathbf{R})]$ | $\approx \text{SD}[V_{\text{rel}}(\mathbf{R})]$ | Median | Mean   | ESD     | $T$     | Pow. 5% | Pow. 1% |
|-------------------------------------------------------------------------------------------|---------------------------------|-------------------------------------------------|--------|--------|---------|---------|---------|---------|
| $p = 64$ , quadratically decreasing $\lambda$ ( $V_{\text{rel}}(\mathbf{P}) = 0.0125$ )   |                                 |                                                 |        |        |         |         |         |         |
| $N = 4$                                                                                   | 0.3391                          | 0.00251                                         | 0.3372 | 0.3392 | 0.01029 | 0.8681  | 0.2072  | 0.0882  |
| $N = 8$                                                                                   | 0.1519                          | 0.00165                                         | 0.1512 | 0.1518 | 0.00621 | -0.3255 | 0.6328  | 0.3828  |
| $N = 16$                                                                                  | 0.0774                          | 0.00112                                         | 0.0773 | 0.0775 | 0.00340 | 2.0673  | 0.9936  | 0.9736  |
| $N = 32$                                                                                  | 0.0439                          | 0.00078                                         | 0.0438 | 0.0439 | 0.00181 | 0.0530  | 1.0000  | 1.0000  |
| $N = 64$                                                                                  | 0.0279                          | 0.00055                                         | 0.0279 | 0.0279 | 0.00100 | 2.2327  | 1.0000  | 1.0000  |
| $N = 128$                                                                                 | 0.0201                          | 0.00039                                         | 0.0201 | 0.0201 | 0.00057 | -2.0319 | 1.0000  | 1.0000  |
| $N = 256$                                                                                 | 0.0163                          | 0.00027                                         | 0.0163 | 0.0163 | 0.00035 | 0.4608  | 1.0000  | 1.0000  |
| $p = 128$ , quadratically decreasing $\lambda$ ( $V_{\text{rel}}(\mathbf{P}) = 0.0062$ )  |                                 |                                                 |        |        |         |         |         |         |
| $N = 4$                                                                                   | 0.3362                          | 0.00089                                         | 0.3351 | 0.3362 | 0.00519 | 0.6706  | 0.2084  | 0.0942  |
| $N = 8$                                                                                   | 0.1473                          | 0.00058                                         | 0.1471 | 0.1474 | 0.00304 | 0.3257  | 0.6450  | 0.4050  |
| $N = 16$                                                                                  | 0.0720                          | 0.00040                                         | 0.0719 | 0.0720 | 0.00165 | -0.1768 | 0.9946  | 0.9700  |
| $N = 32$                                                                                  | 0.0381                          | 0.00028                                         | 0.0380 | 0.0380 | 0.00087 | -1.2068 | 1.0000  | 1.0000  |
| $N = 64$                                                                                  | 0.0219                          | 0.00019                                         | 0.0219 | 0.0219 | 0.00046 | -1.1815 | 1.0000  | 1.0000  |
| $N = 128$                                                                                 | 0.0140                          | 0.00014                                         | 0.0140 | 0.0140 | 0.00025 | 0.1212  | 1.0000  | 1.0000  |
| $N = 256$                                                                                 | 0.0101                          | 0.00010                                         | 0.0101 | 0.0101 | 0.00014 | -0.2988 | 1.0000  | 1.0000  |
| $p = 256$ , quadratically decreasing $\lambda$ ( $V_{\text{rel}}(\mathbf{P}) = 0.0031$ )  |                                 |                                                 |        |        |         |         |         |         |
| $N = 4$                                                                                   | 0.3347                          | 0.00031                                         | 0.3342 | 0.3347 | 0.00253 | -0.0296 | 0.2004  | 0.0746  |
| $N = 8$                                                                                   | 0.1451                          | 0.00020                                         | 0.1449 | 0.1451 | 0.00153 | -0.8455 | 0.6272  | 0.3982  |
| $N = 16$                                                                                  | 0.0693                          | 0.00014                                         | 0.0693 | 0.0693 | 0.00082 | -1.5371 | 0.9944  | 0.9700  |
| $N = 32$                                                                                  | 0.0352                          | 0.00010                                         | 0.0351 | 0.0352 | 0.00044 | 0.3984  | 1.0000  | 1.0000  |
| $N = 64$                                                                                  | 0.0189                          | 0.00007                                         | 0.0189 | 0.0189 | 0.00022 | -1.3213 | 1.0000  | 1.0000  |
| $N = 128$                                                                                 | 0.0109                          | 0.00005                                         | 0.0109 | 0.0109 | 0.00012 | -2.1747 | 1.0000  | 1.0000  |
| $N = 256$                                                                                 | 0.0070                          | 0.00003                                         | 0.0070 | 0.0070 | 0.00006 | 0.5172  | 1.0000  | 1.0000  |
| $p = 1024$ , quadratically decreasing $\lambda$ ( $V_{\text{rel}}(\mathbf{P}) = 0.0008$ ) |                                 |                                                 |        |        |         |         |         |         |
| $N = 4$                                                                                   | 0.3337                          | 0.000039                                        | 0.3336 | 0.3337 | 0.00062 | -0.0472 | 0.1970  | 0.0824  |
| $N = 8$                                                                                   | 0.1434                          | 0.000026                                        | 0.1434 | 0.1434 | 0.00039 | 0.3587  | 0.6418  | 0.3862  |
| $N = 16$                                                                                  | 0.0673                          | 0.000017                                        | 0.0673 | 0.0673 | 0.00020 | -1.8148 | 0.9940  | 0.9722  |
| $N = 32$                                                                                  | 0.0330                          | 0.000012                                        | 0.0330 | 0.0330 | 0.00010 | 0.7257  | 1.0000  | 1.0000  |
| $N = 64$                                                                                  | 0.0166                          | 0.000009                                        | 0.0166 | 0.0166 | 0.00005 | -1.0370 | 1.0000  | 1.0000  |
| $N = 128$                                                                                 | 0.0086                          | 0.000006                                        | 0.0086 | 0.0086 | 0.00003 | -1.2065 | 1.0000  | 1.0000  |
| $N = 256$                                                                                 | 0.0047                          | 0.000004                                        | 0.0047 | 0.0047 | 0.00001 | 0.0830  | 1.0000  | 1.0000  |

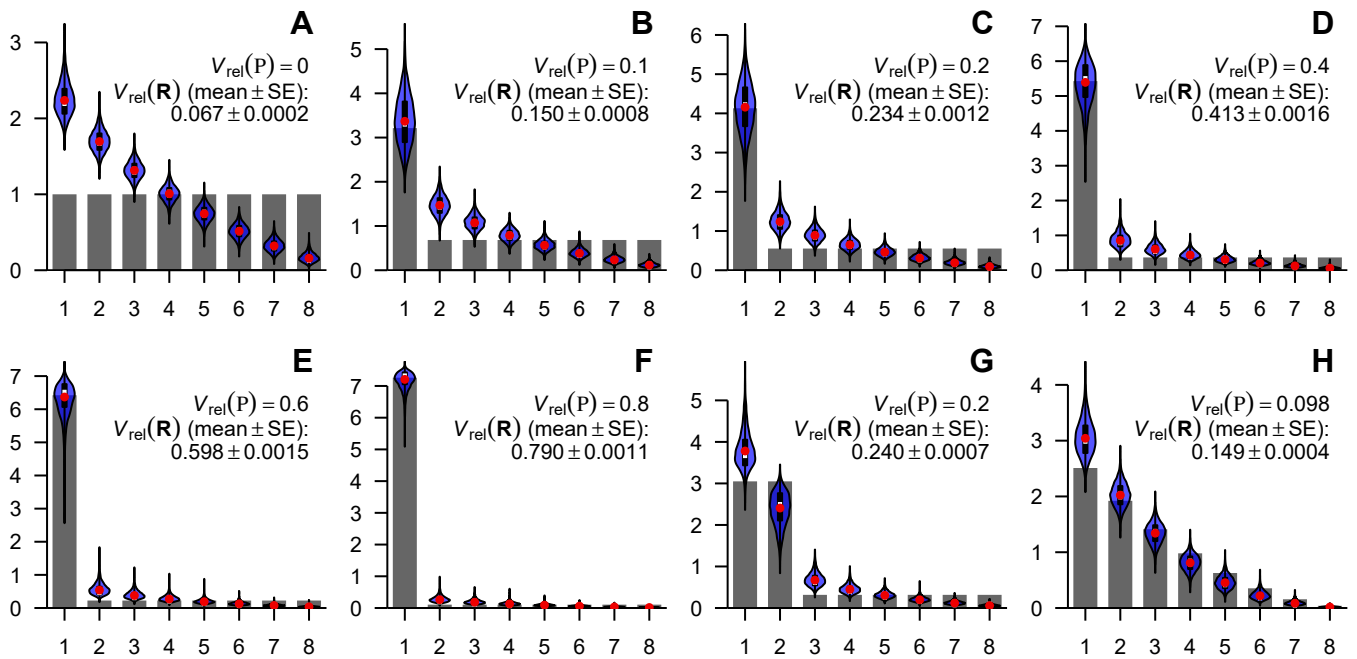

**Figure S1.** Selected population eigenvalue structures used in simulations and distributions of sample eigenvalues, examples for  $p = 8$ . The eigenvalues of population correlation matrix are shown as scree plots, and distributions of sample eigenvalues with  $N = 16$  are shown as violin plots. The conditions are as in Figure 4. **A**, null condition; **B–G**,  $q$ -large  $\lambda$  conditions,  $q = 1$  (**B–F**) or 2 (**G**), with  $V_{\text{rel}}(\Sigma) = 0.1, 0.2, 0.4, 0.6, 0.8$ , and 0.2, respectively; **H**, quadratically decreasing  $\lambda$  condition. Red dots denote empirical means of sample eigenvalues, whereas white bars (mostly overlapping with red dots) denote medians. Thick black bars within violins denote interquartile ranges. Note different scales of vertical axes.

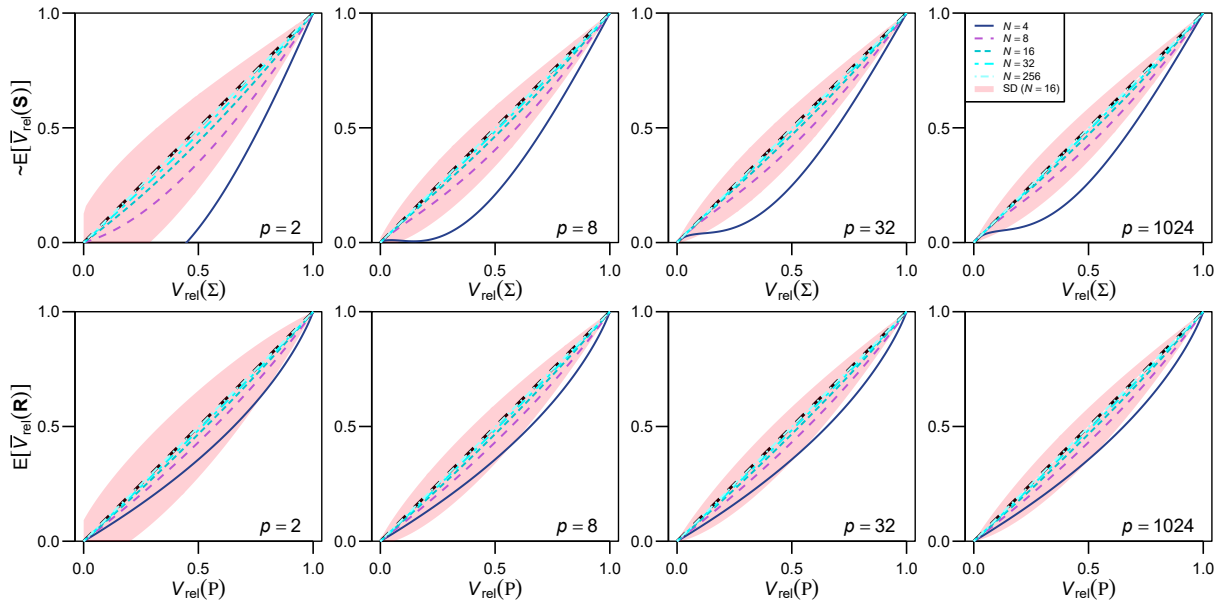

**Figure S2.** Profiles of the expectations of adjusted eigenvalue dispersion indices in selected conditions. The expectations of  $\bar{V}_{\text{rel}}(\mathbf{S})$  (approximate; top row) and  $\bar{V}_{\text{rel}}(\mathbf{R})$  (bottom row) are drawn with solid lines, for  $p = 2, 8, 32$ , and  $1024$  (from left to right) and for  $N = 4, 8, 16, 32$ , and  $256$ . In all cases,  $n = N - 1$ . The breadth of one standard deviation at  $N = 16$  is also shown around the mean profiles with pink fills; these are approximations except for  $\bar{V}_{\text{rel}}(\mathbf{R})$  for  $p = 2$ . Note that actual distributions might be skewed unlike these fills. All profiles are from 1-large  $\lambda$  conditions as in Figure 2. The initial decrease of the  $E[\bar{V}_{\text{rel}}(\mathbf{S})]$  profiles in some cases seems to be an artifact of approximation, so the negative excursion in profiles should be ignored.

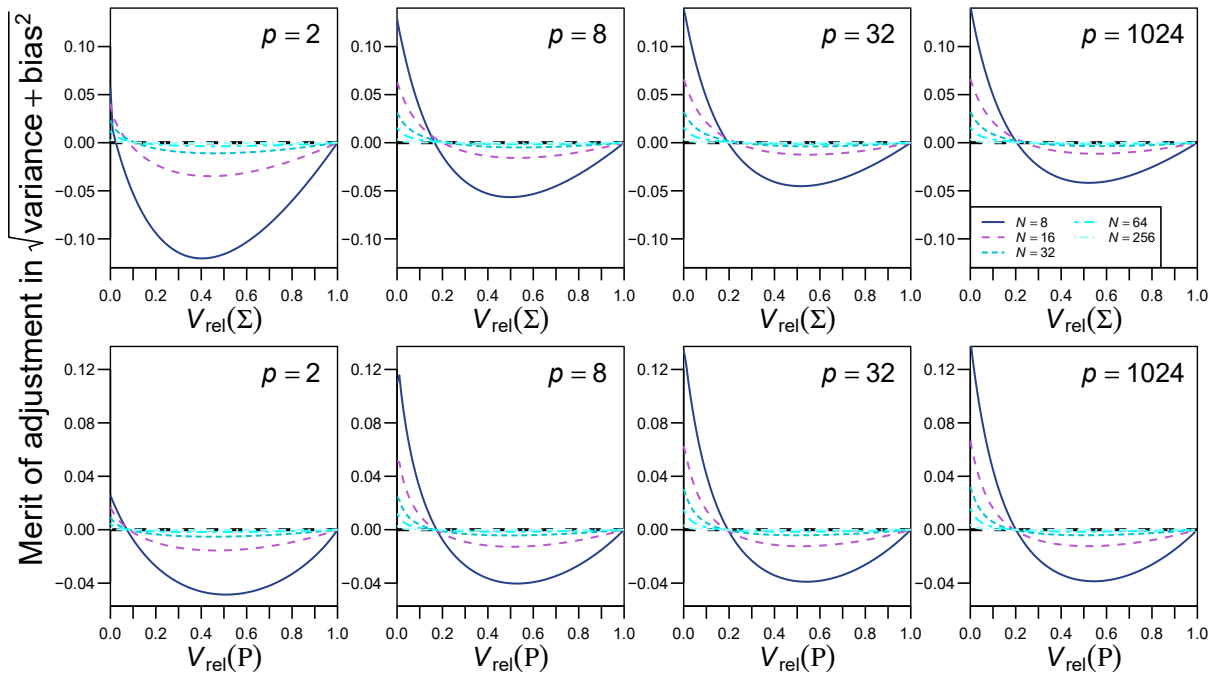

**Figure S3.** Merit of adjustment for eigenvalue dispersion indices. Square root of inaccuracy ( $= \text{Var}[V_{\text{rel}}(\mathbf{S})] + \{E[V_{\text{rel}}(\mathbf{S})] - V_{\text{rel}}(\boldsymbol{\Sigma})\}^2$ , and so on) is compared between  $\bar{V}_{\text{rel}}(\mathbf{S})$  and  $V_{\text{rel}}(\mathbf{S})$  (top row), and between  $\bar{V}_{\text{rel}}(\mathbf{R})$  and  $V_{\text{rel}}(\mathbf{R})$  (bottom row) across varying parameter values, for  $p = 2, 8, 32$ , and  $1024$  (from left to right) and for  $N = 8, 16, 32, 64$ , and  $256$ . In all cases,  $n = N - 1$ . Positive values correspond to smaller inaccuracy in the adjusted indices—merit of adjustment. Note that these profiles are approximations, except under the null conditions (left-hand end of each plot) and for  $V_{\text{rel}}(\mathbf{R})$  with  $p = 2$ . Deflection of the profile near the null condition in some cases correspond to a discrepancy between exact and approximate results. All profiles are from 1-large  $\lambda$  conditions as in Figure 2.



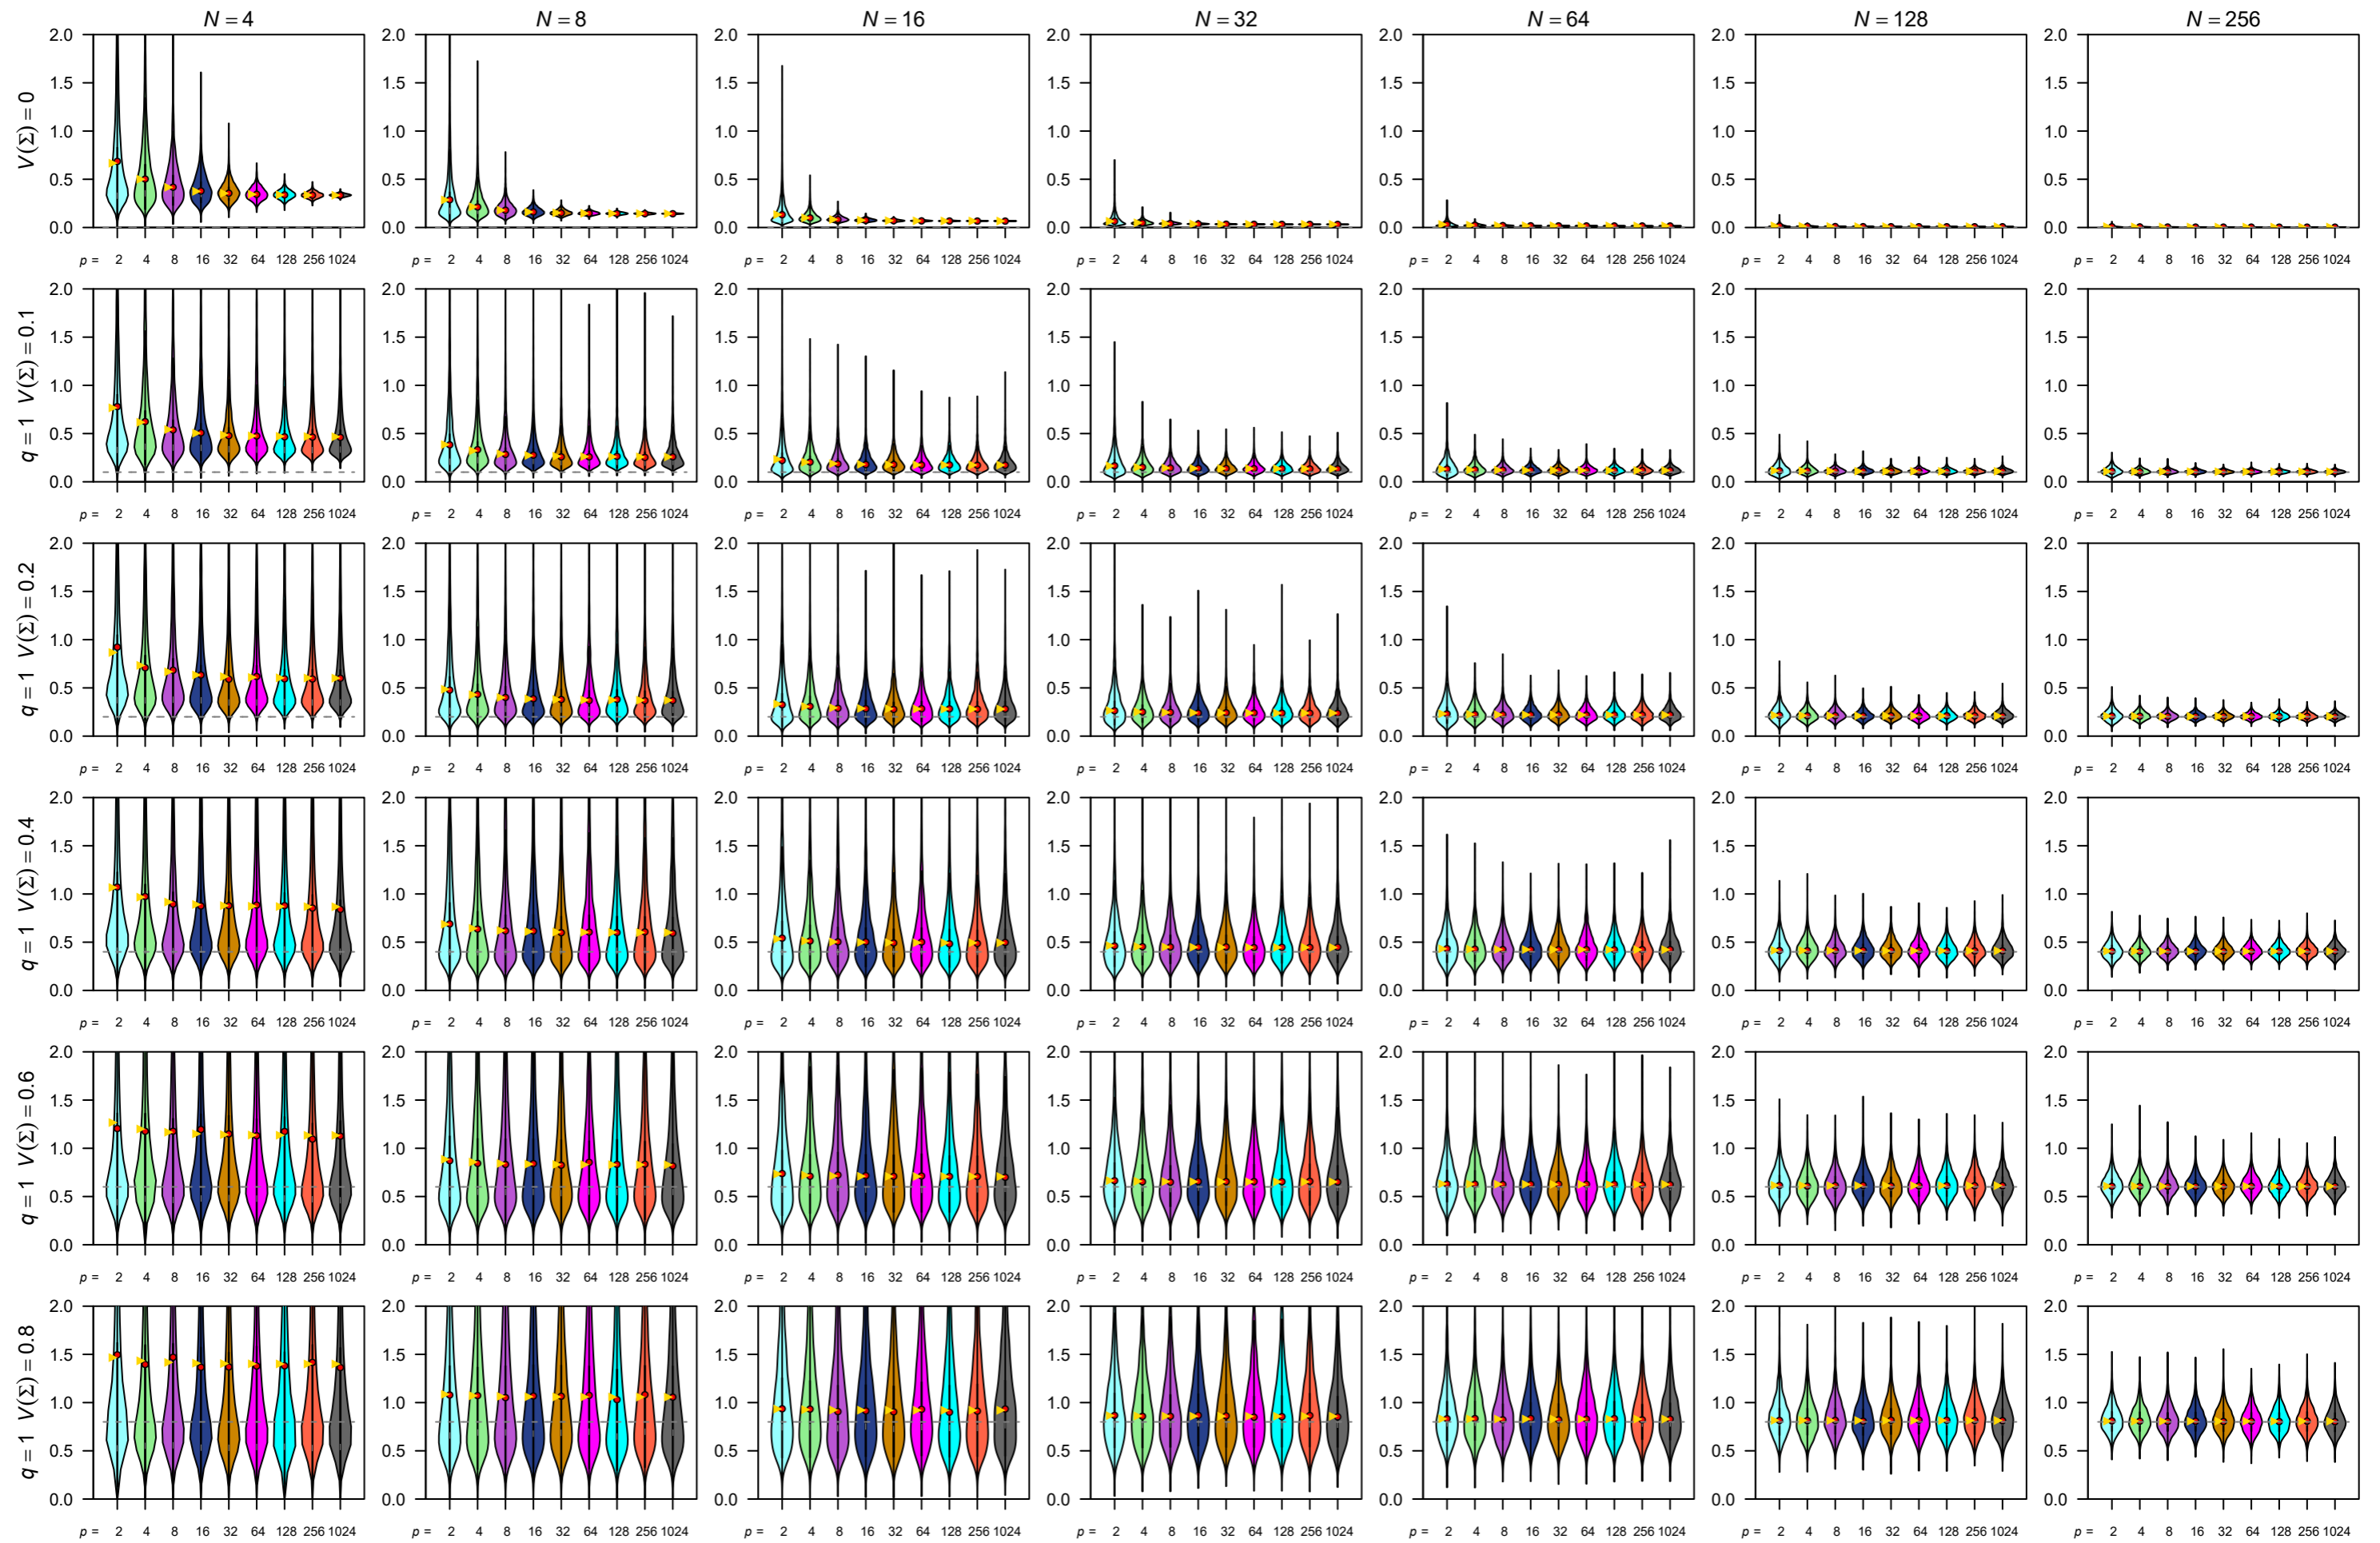

**Figure S4.** Simulation results for the eigenvalue variance of covariance matrix  $V(\mathbf{S})$ ,  $q = 1$ . See Figure 5 for legends. Note that extreme values in some panels are cropped for visual clarity.

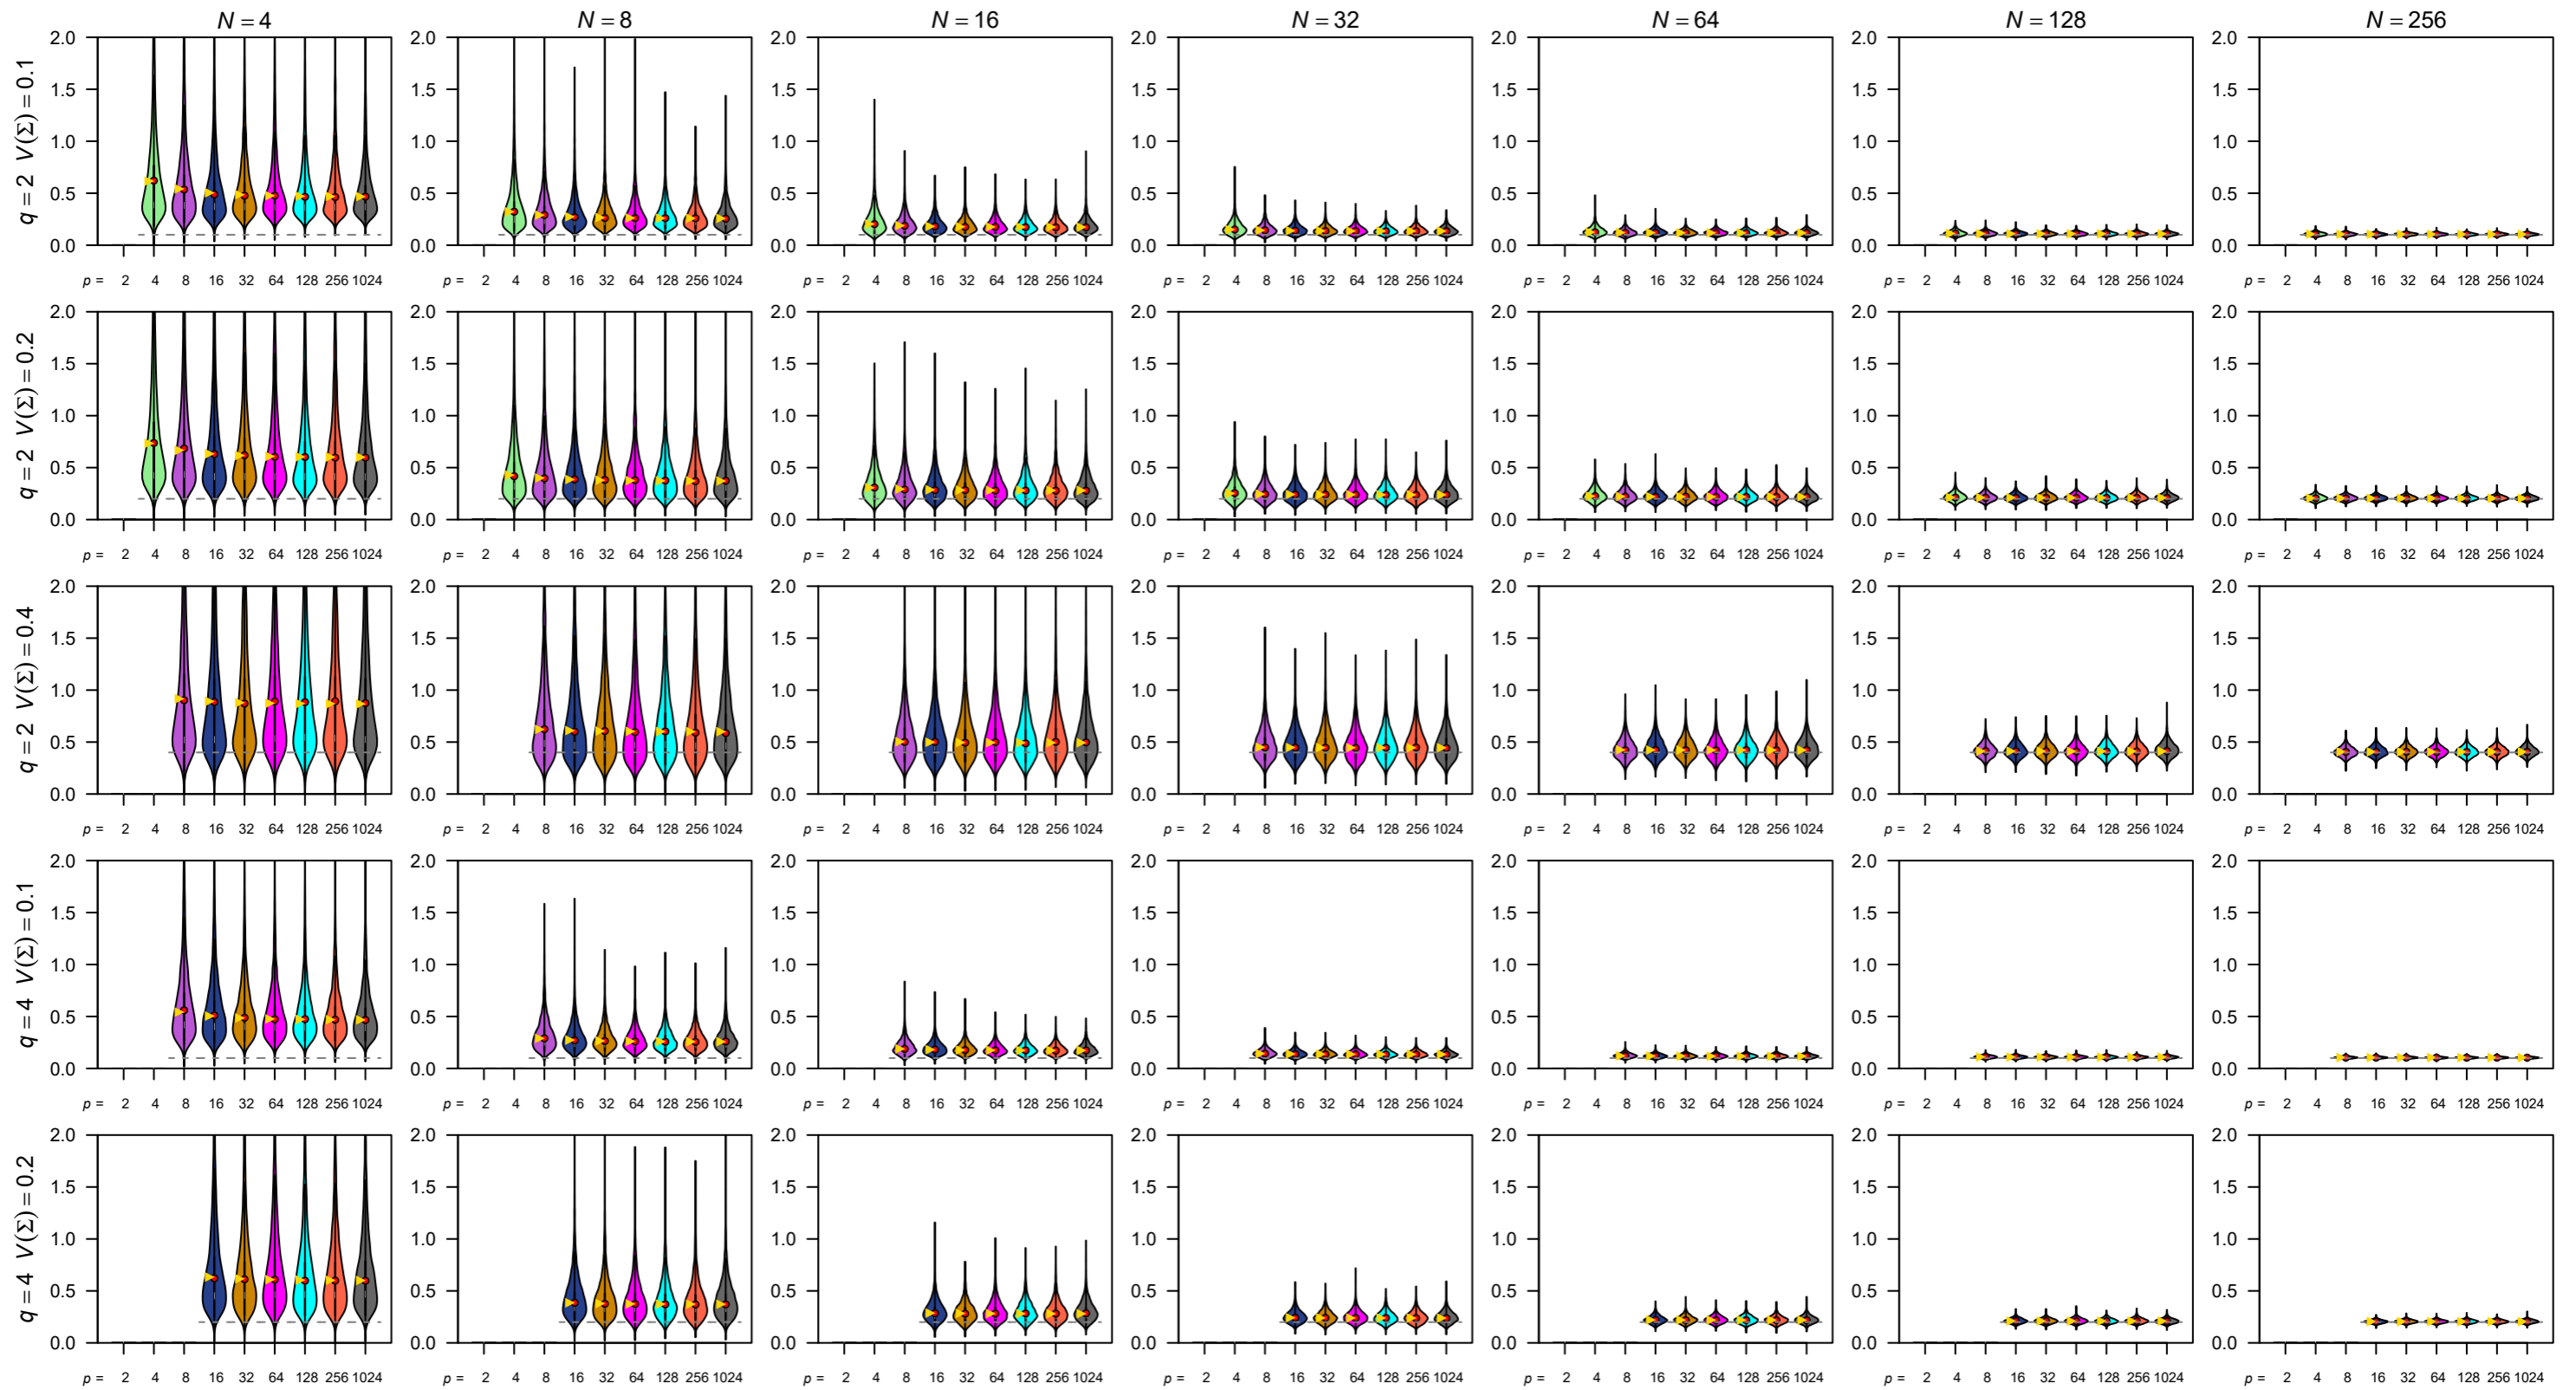

**Figure S5.** Simulation results for the eigenvalue variance of covariance matrix  $V(\mathbf{S})$ ,  $q = 2$  and  $4$ . See Figure 5 for legends. Note that extreme values in some panels are cropped for visual clarity.

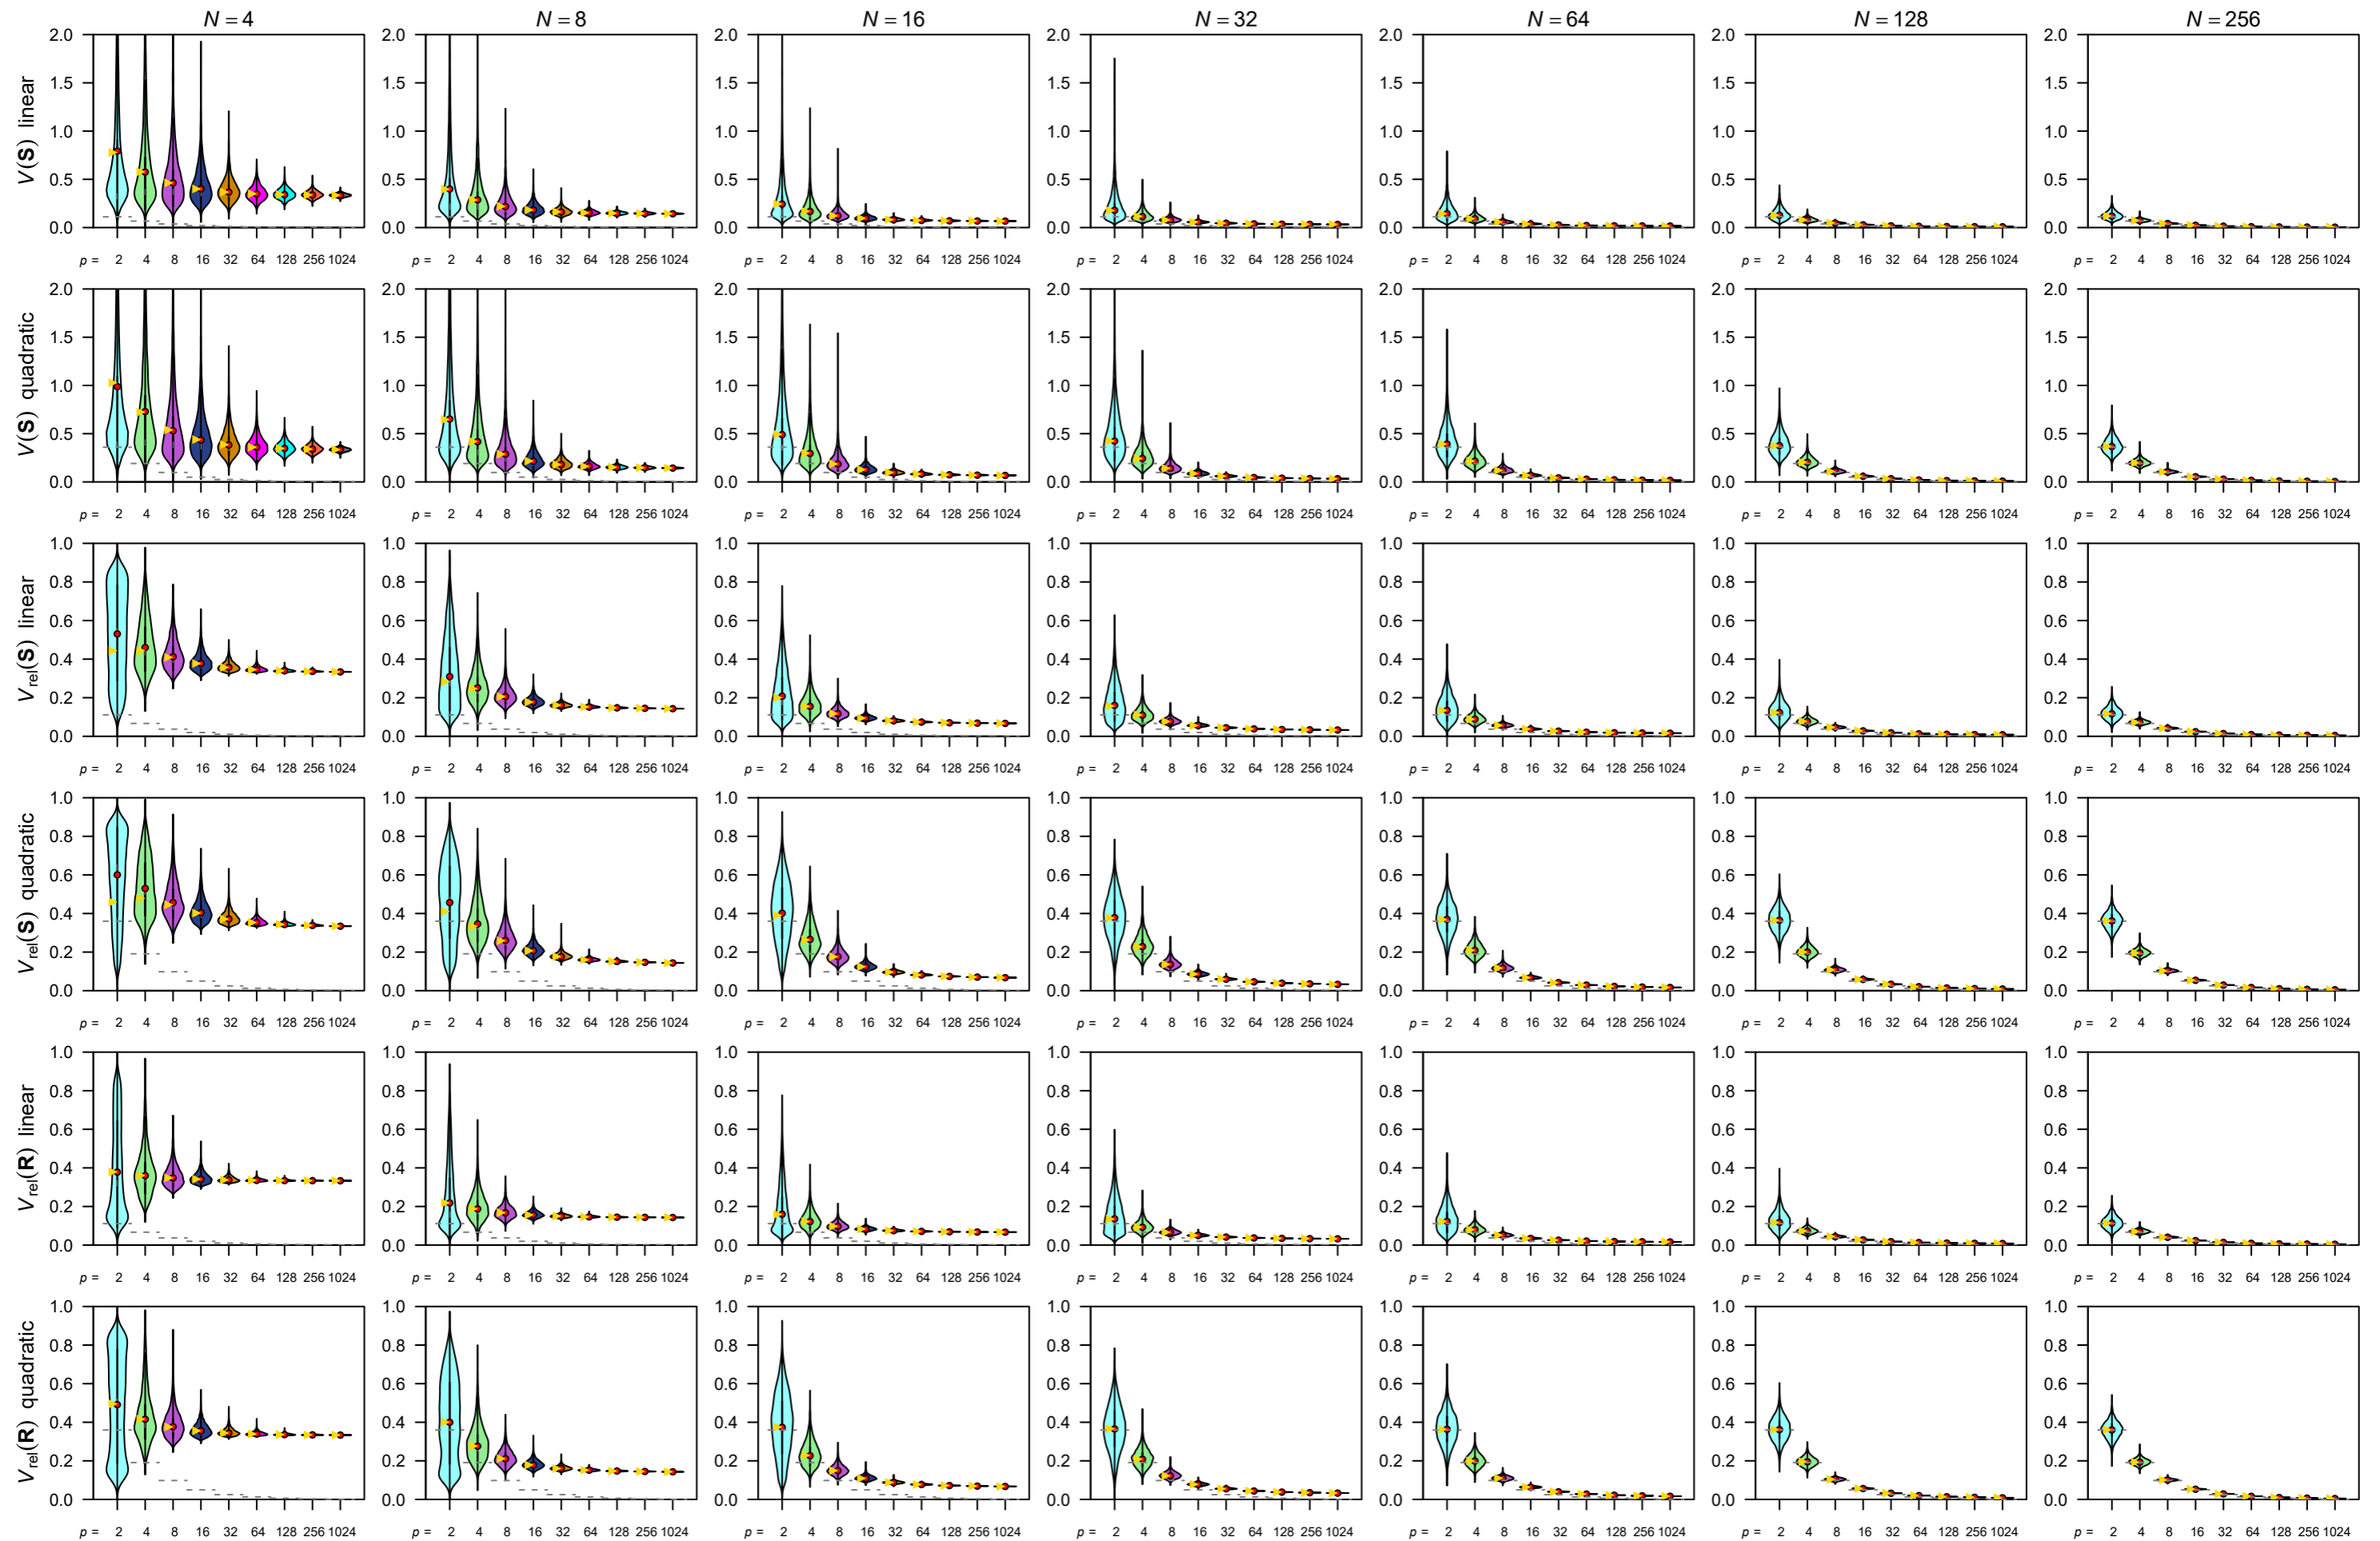

**Figure S6.** Simulation results, linearly- and quadratically decreasing  $\lambda$  conditions. Empirical distributions of simulated  $V(\mathbf{S})$ ,  $V_{\text{rel}}(\mathbf{S})$ , and  $V_{\text{rel}}(\mathbf{R})$  are shown in violin plots. See Figure 5 for legends. Note that extreme values in some panels for  $V(\mathbf{S})$  are cropped for visual clarity.

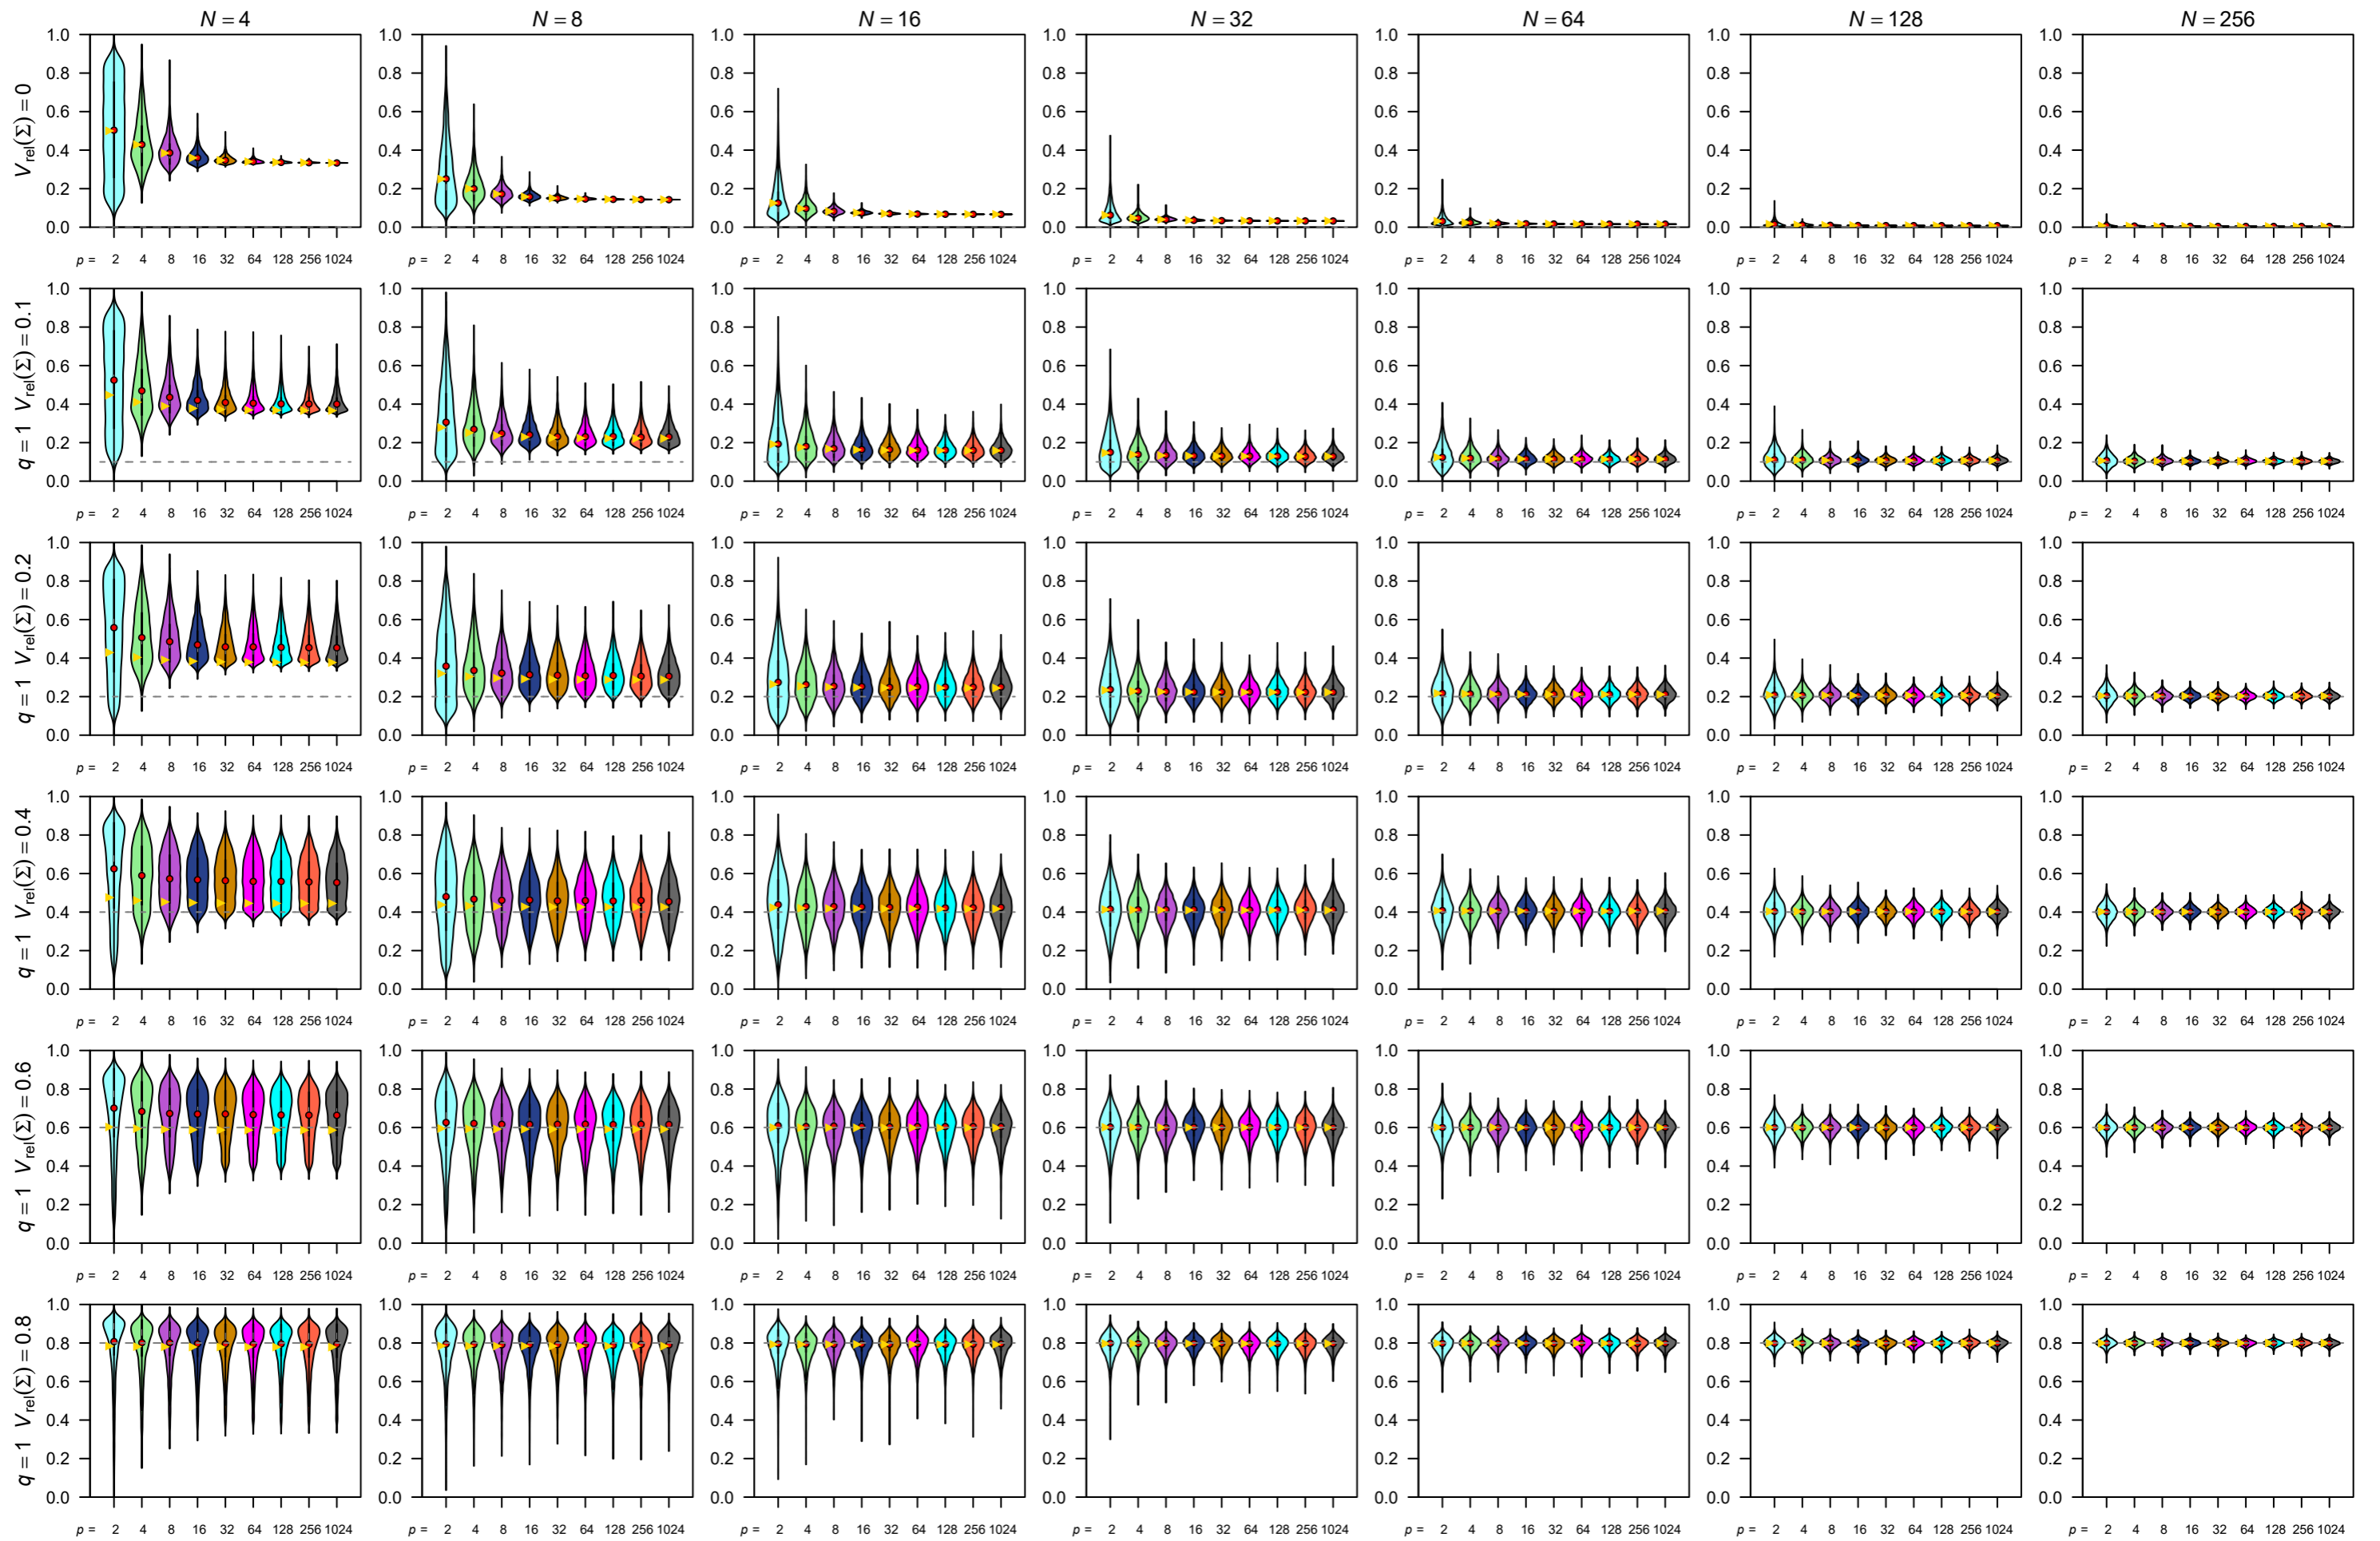

**Figure S7.** Simulation results for the relative eigenvalue variance of covariance matrix  $V_{\text{rel}}(\mathbf{S})$ ,  $q = 1$ . See Figure 5 for legends.

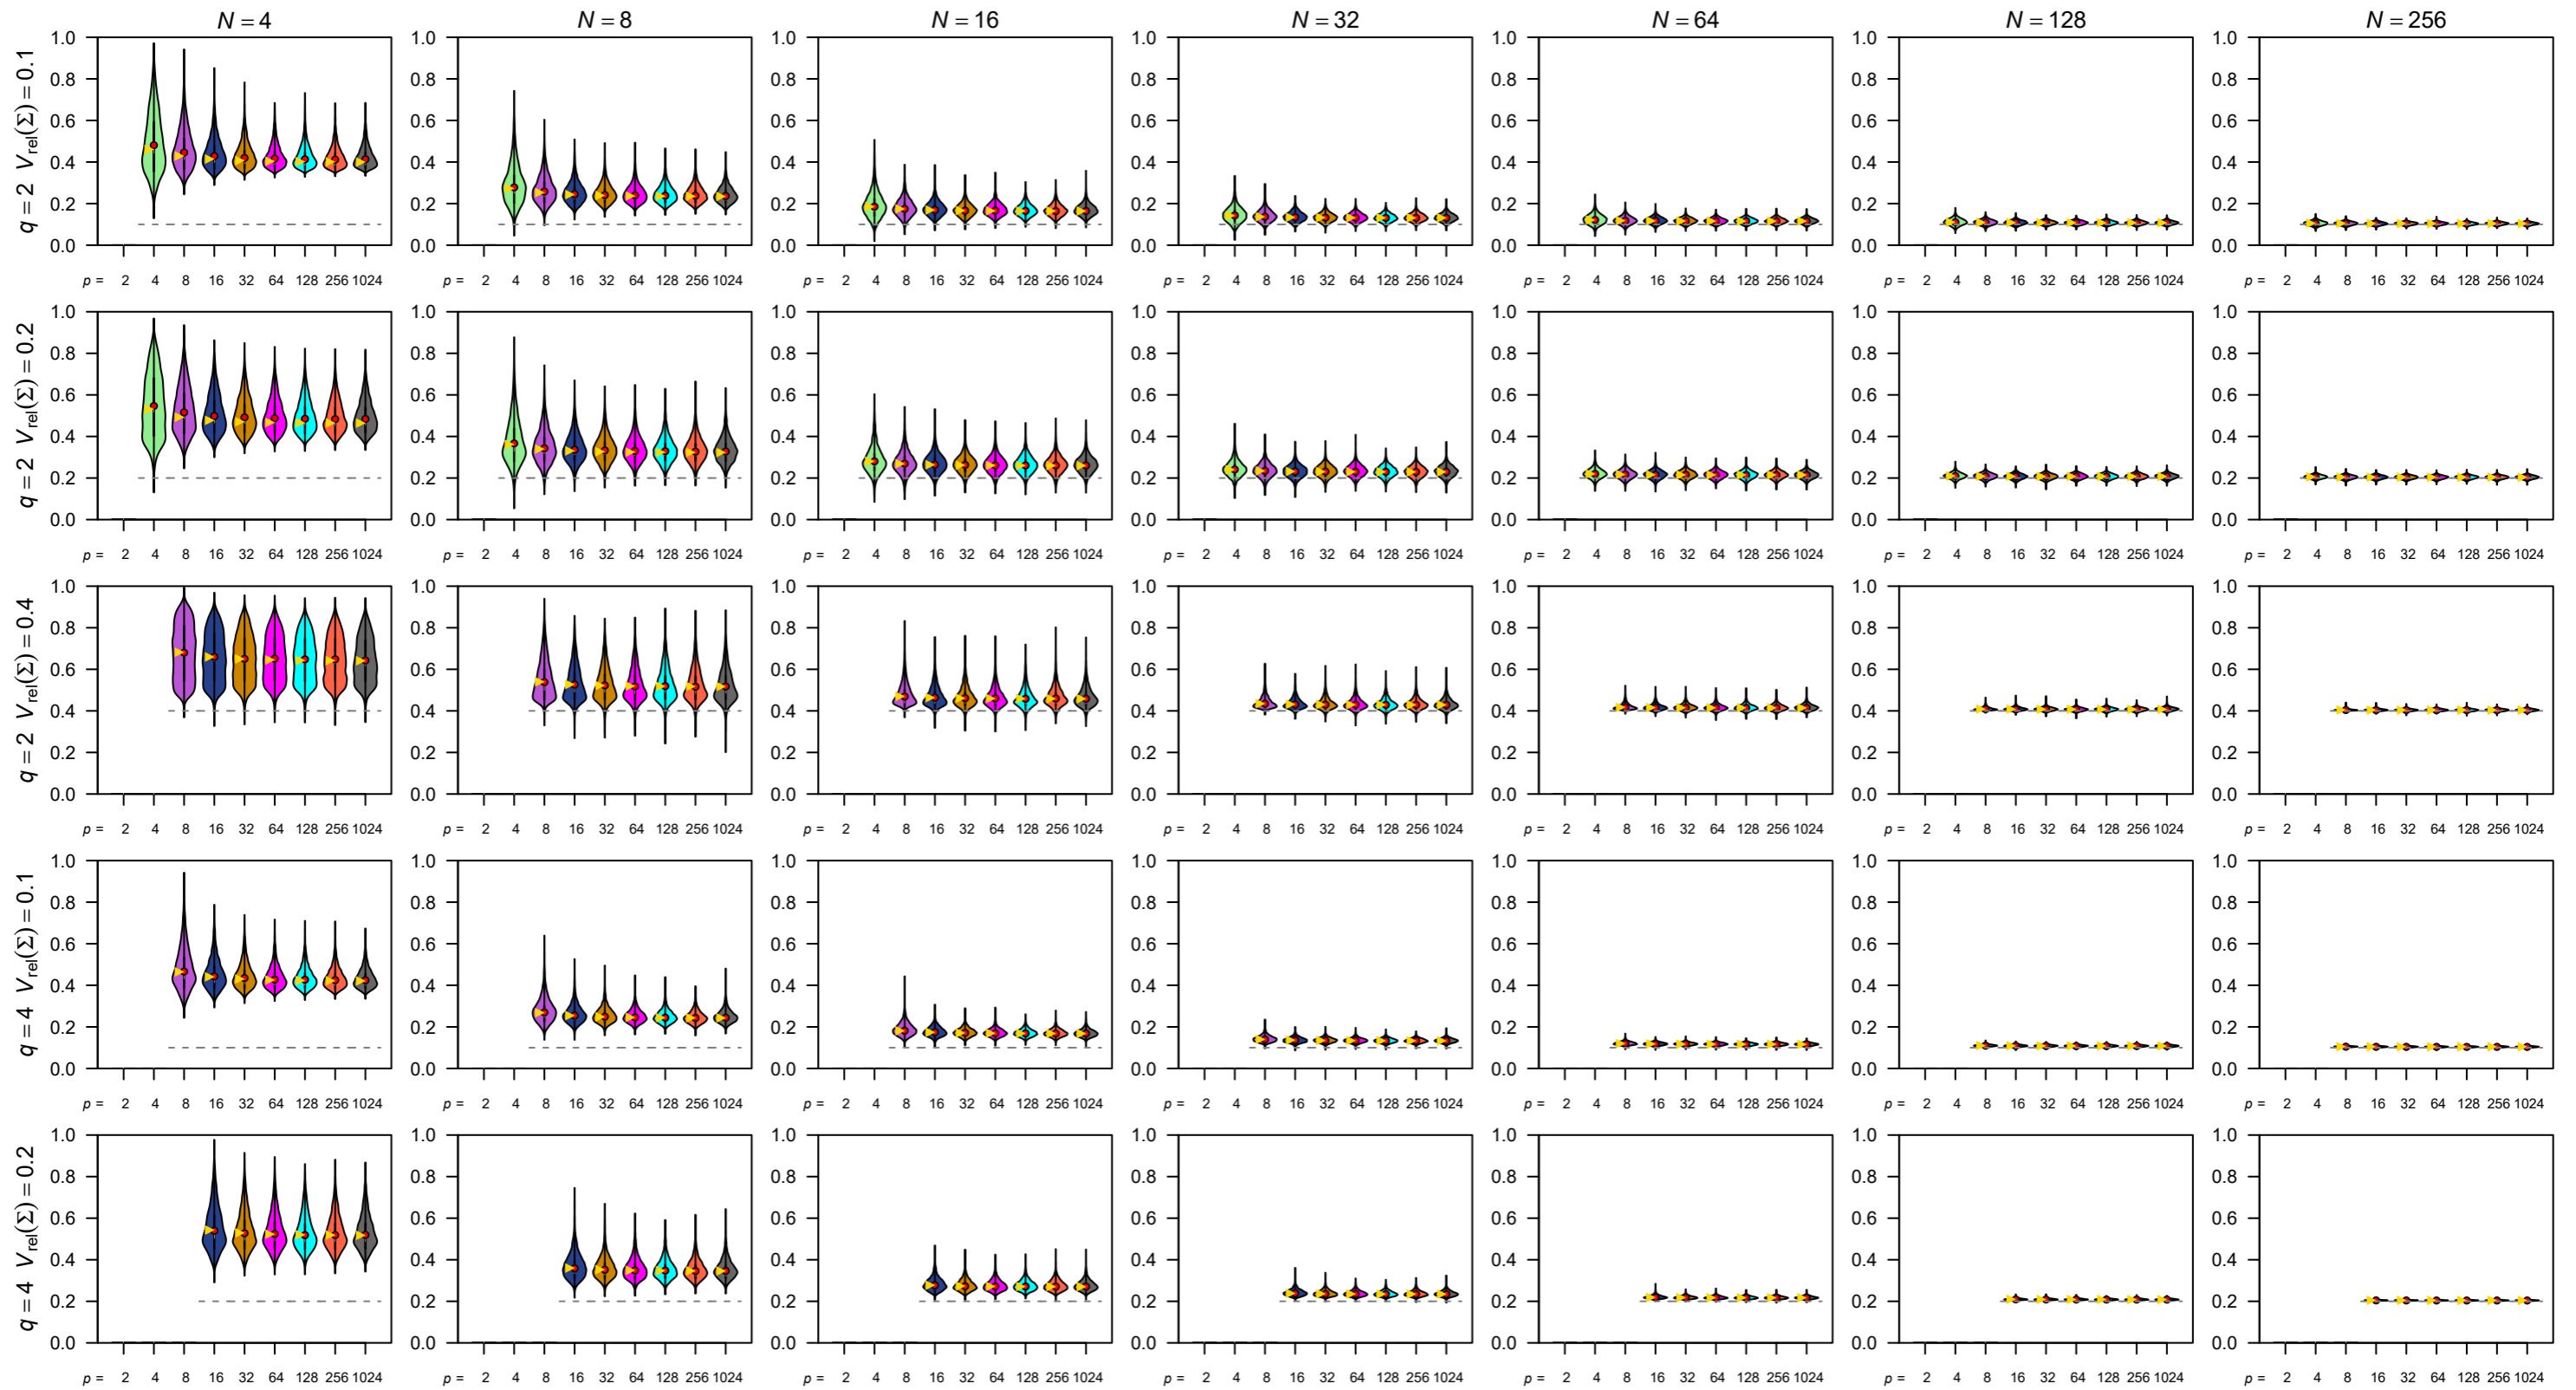

**Figure S8.** Simulation results for the relative eigenvalue variance of covariance matrix  $V_{\text{rel}}(\mathbf{S})$ ,  $q=2$  and 4. See Figure 5 for legends.

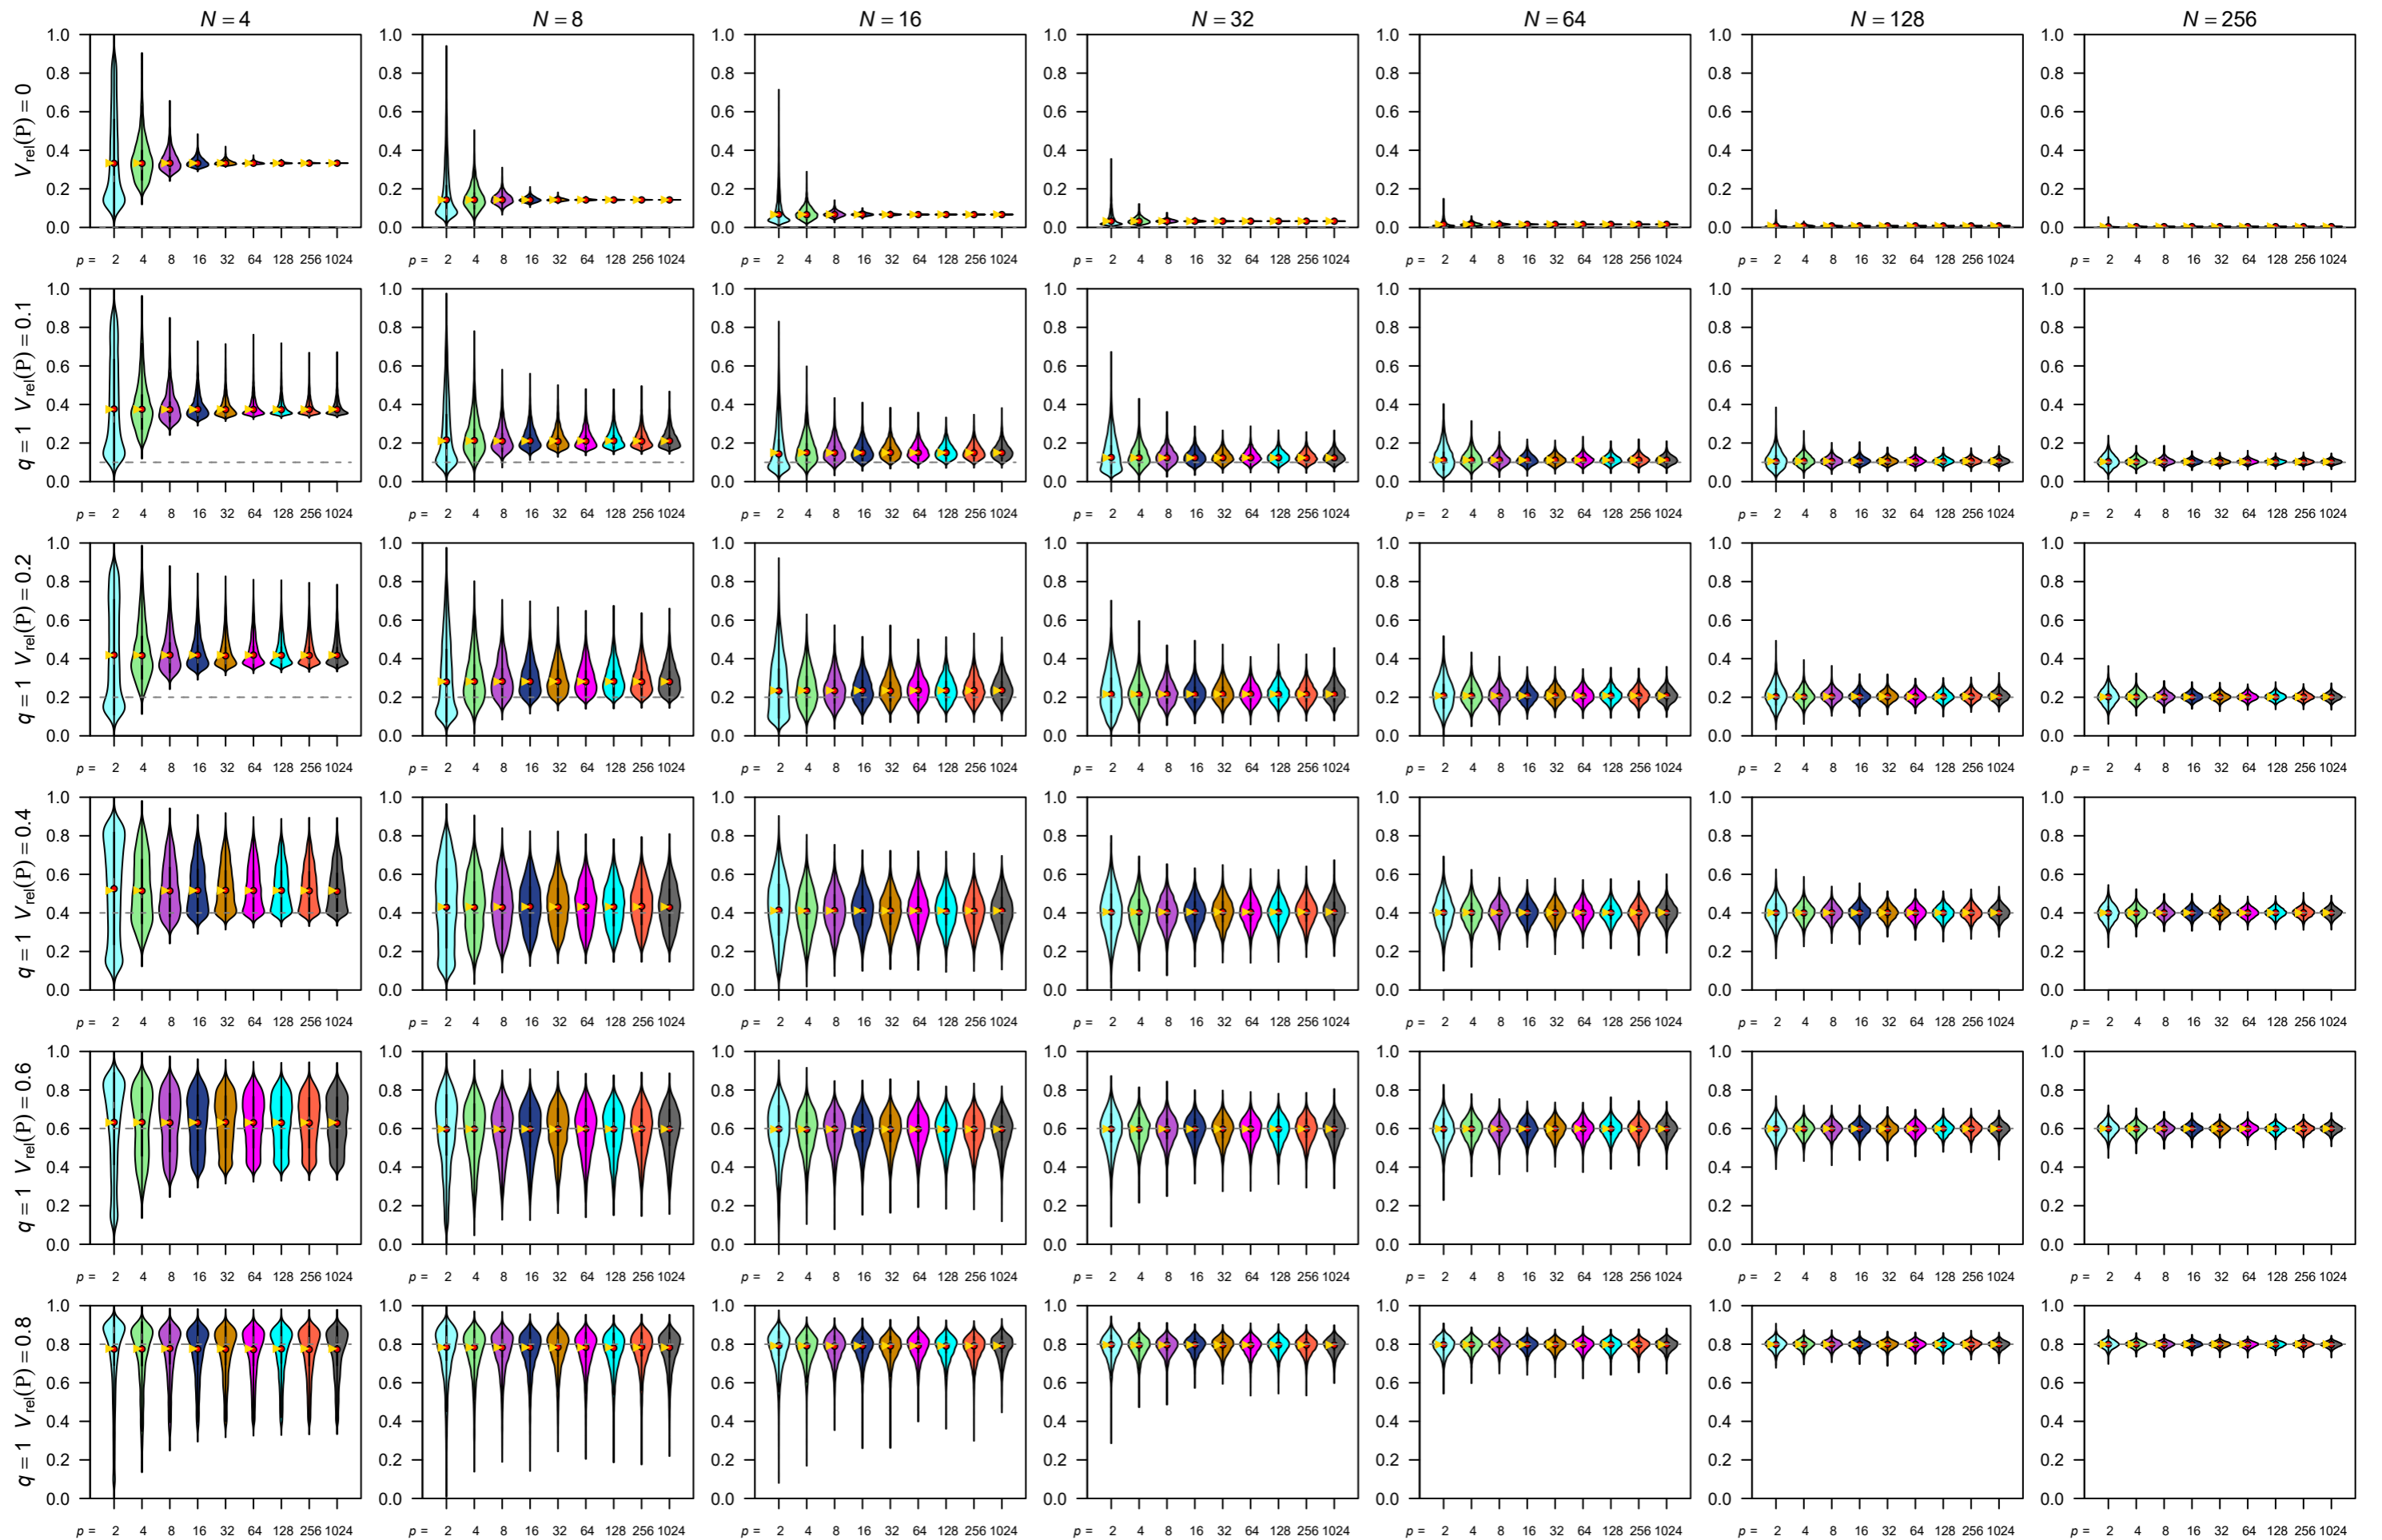

**Figure S9.** Simulation results for the relative eigenvalue variance of correlation matrix  $V_{\text{rel}}(\mathbf{R})$ ,  $q = 1$ . See Figure 5 for legends. Note that a peak is usually present near 0 when  $p = 2$  and  $N \leq 8$  (only), but this is invisible due to smoothing in the violin plot.

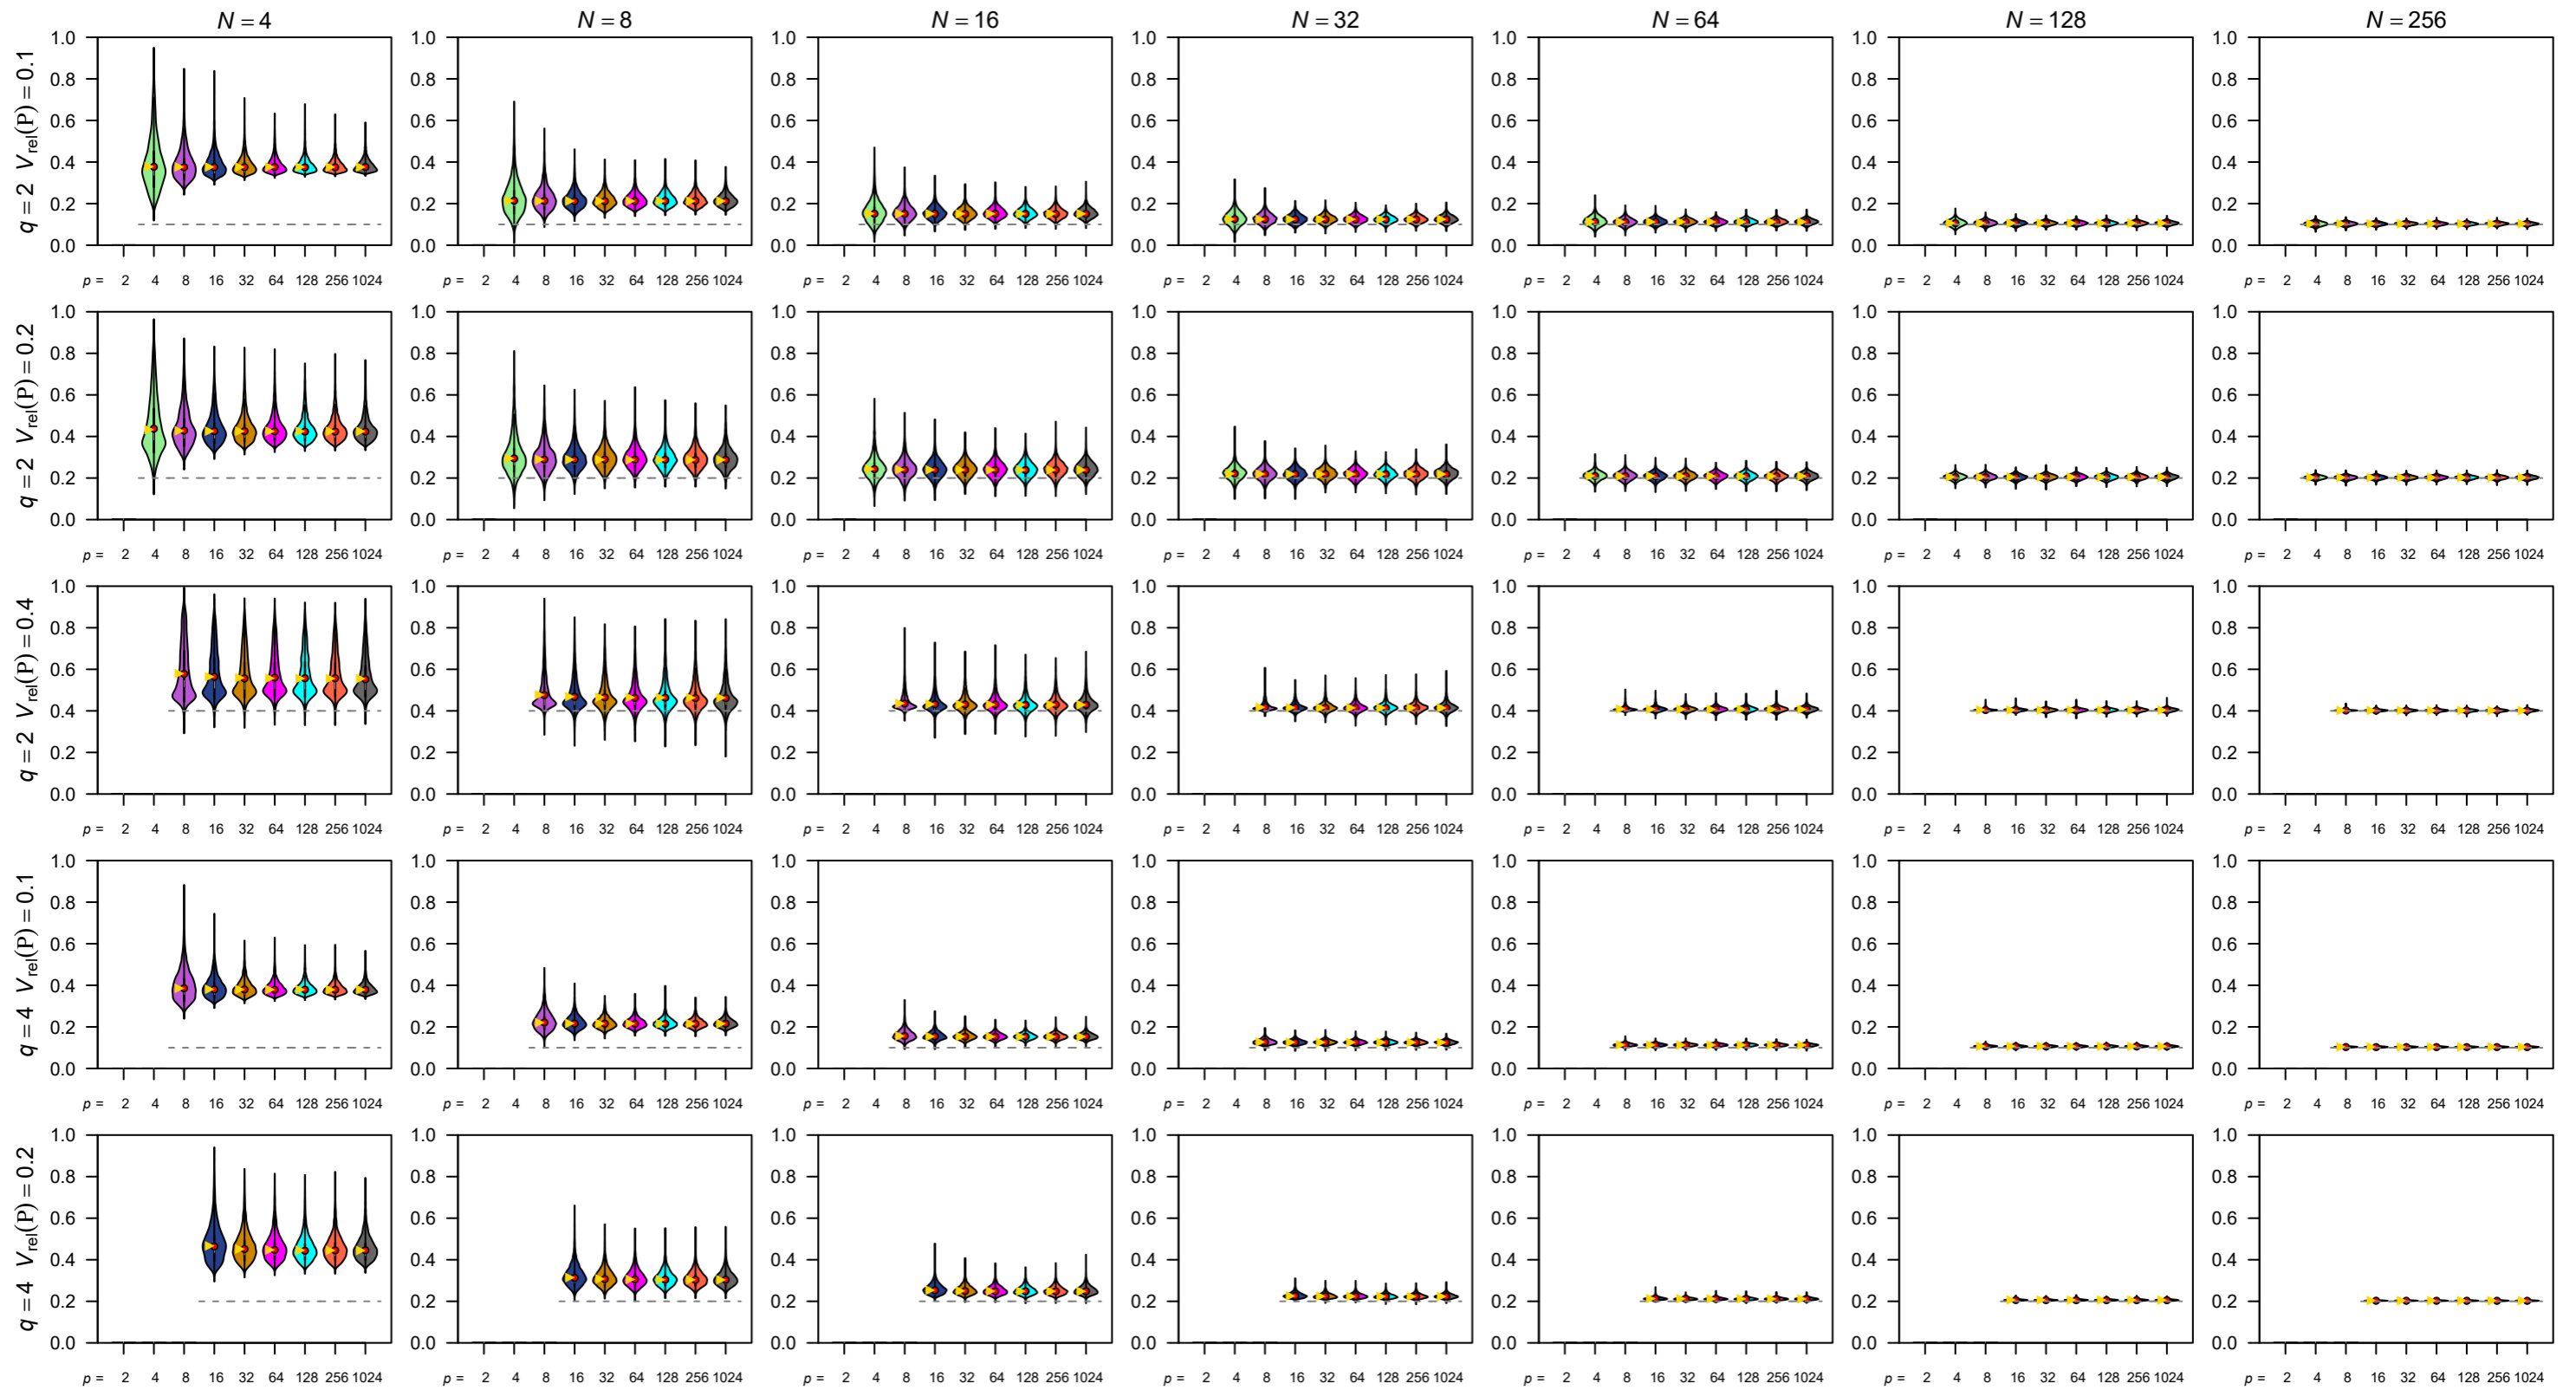

**Figure S10.** Simulation results for the relative eigenvalue variance of correlation matrix  $V_{\text{rel}}(\mathbf{R})$ ,  $q = 2$  and  $4$ . See Figure 5 for legends.
